# Supplementary material for: Complexes of Dichlorogermylene with Phosphine/Sulfoxide-Supported Carbone as Ligand
Source: MDPI journal article supplement (doi:10.3390/molecules26072005), 2021-04-01
Supplement: s1 [file s1]

## **Supporting information for**

### **Complexes of Dichlorogermylene with Phosphine/Sulfoxide-Supported Carbone as Ligand.**

Ugo Authesserre <sup>1</sup>, Sophie Hameury <sup>1,2</sup>, Aymeric Dajnak <sup>1</sup>, Nathalie Saffon-Merceron <sup>3</sup>, Antoine Baceiredo <sup>1</sup>, David Madec <sup>1,\*</sup>, and Eddy Maerten <sup>1,\*</sup>

<sup>1</sup> Université de Toulouse, UPS, and CNRS, LHFA UMR 5069, 118 route de Narbonne, 31062 Toulouse (France)

<sup>2</sup> Université de Poitiers, IC2MP, UMR CNRS 7285, 1 rue Marcel Doré, 86073 Poitiers Cedex 9 (France)

<sup>3</sup> Université de Toulouse, UPS, and CNRS, ICT UAR2599 118 route de Narbonne, 31062 Toulouse (France)

\* Correspondence : [madec@chimie.ups-tlse.fr](mailto:madec@chimie.ups-tlse.fr) ; [maerten@chimie.ups-tlse.fr](mailto:maerten@chimie.ups-tlse.fr)

|                                    | <b>Page</b> |
|------------------------------------|-------------|
| <b>Table of contents</b>           | <b>S2</b>   |
| <b>Selected spectroscopic data</b> | <b>S3</b>   |
| <b>X-ray analysis</b>              | <b>S10</b>  |

## 400.10.fid — UA-083 CD2Cl2 1H

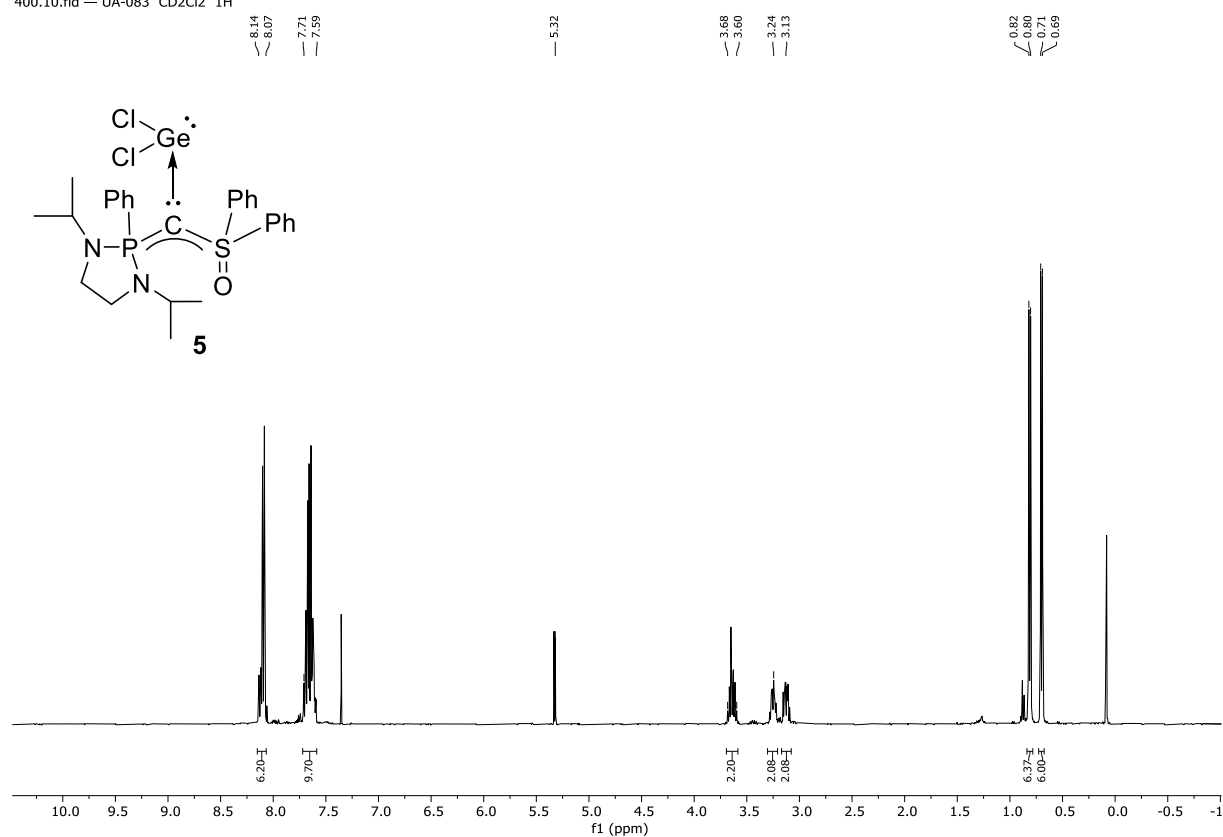

500.3.fid — UA-083 CD2CL2 13C{1H}

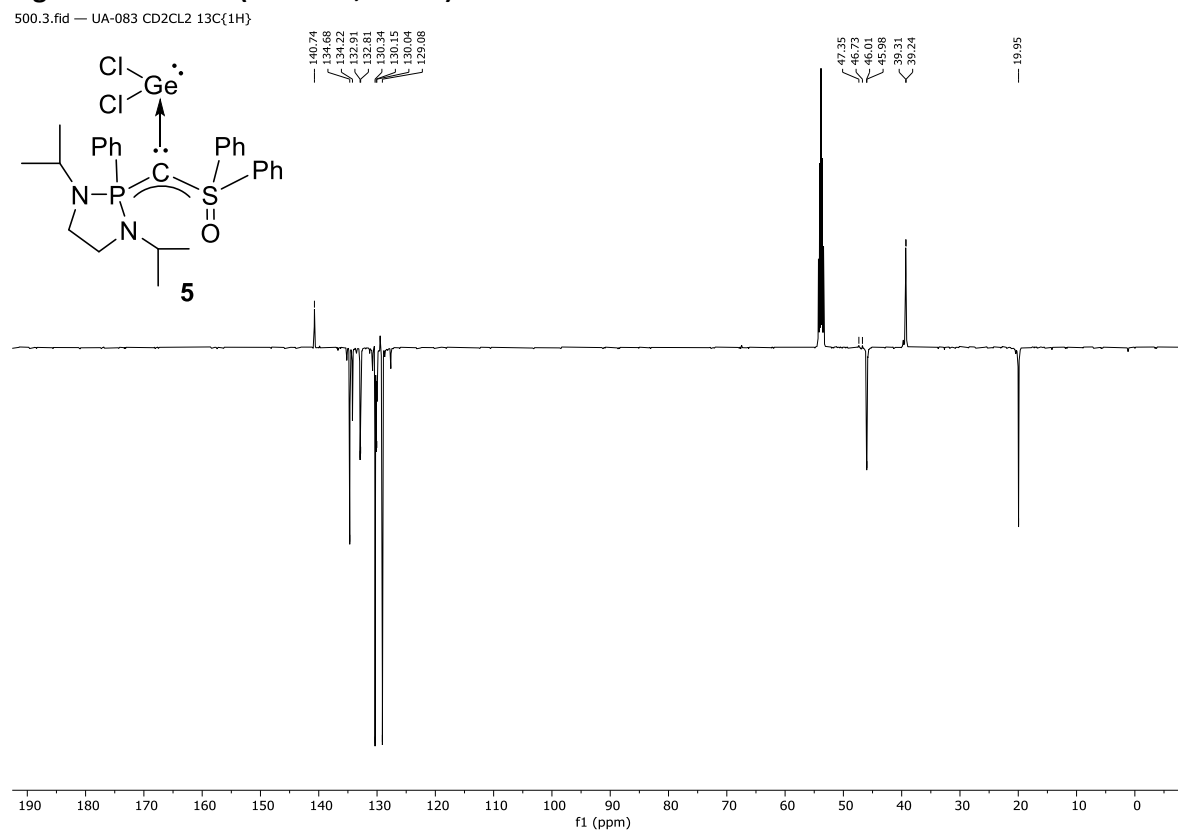

**Figure S2: J-mod  $^{13}\text{C}\{^1\text{H}\}$  NMR (125 MHz,  $\text{CD}_2\text{Cl}_2$ )**

400.8.fid — UA-083 CD<sub>2</sub>Cl<sub>2</sub> 31P{1H}

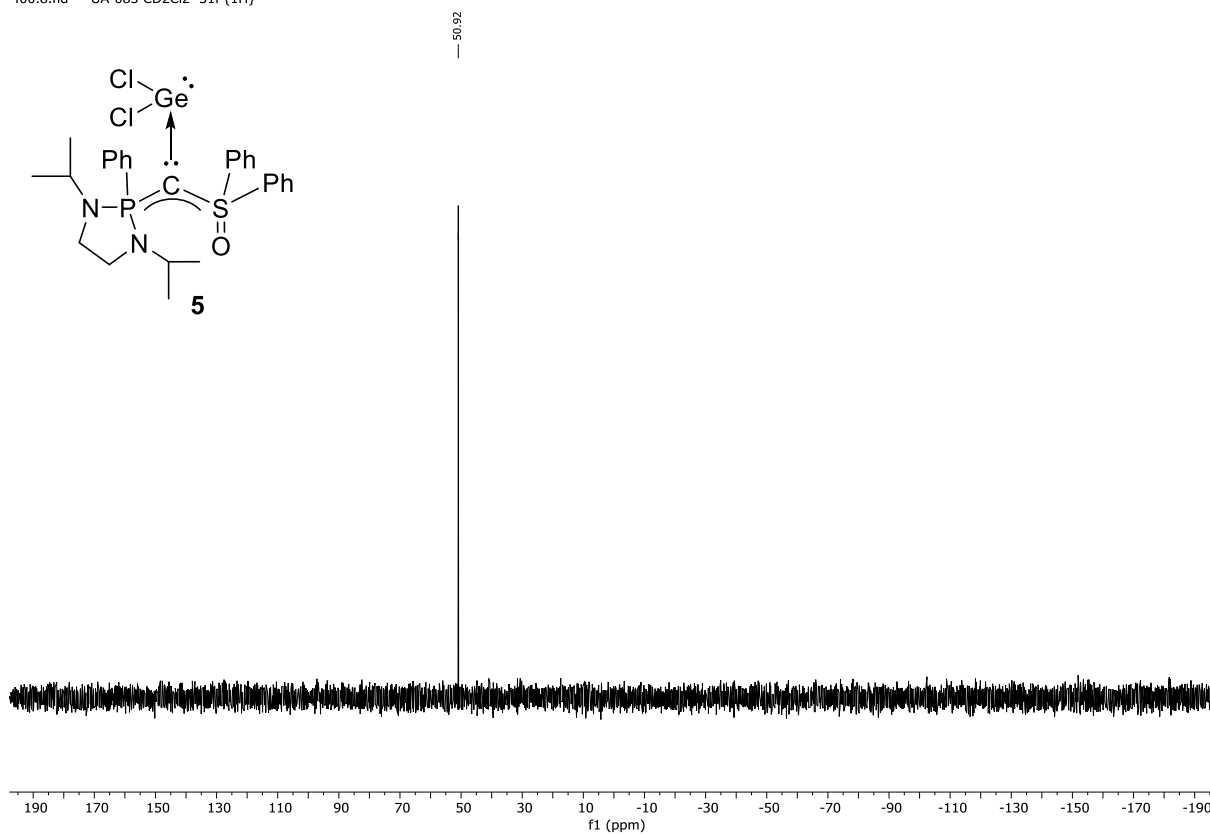

Figure S3: <sup>31</sup>P{<sup>1</sup>H} NMR (161 MHz, CD<sub>2</sub>Cl<sub>2</sub>)

authesserre\_u\_300a.29.fid — hfa ECOIH — UA-085-BY-GeCl<sub>2</sub> in benzene — 31P{

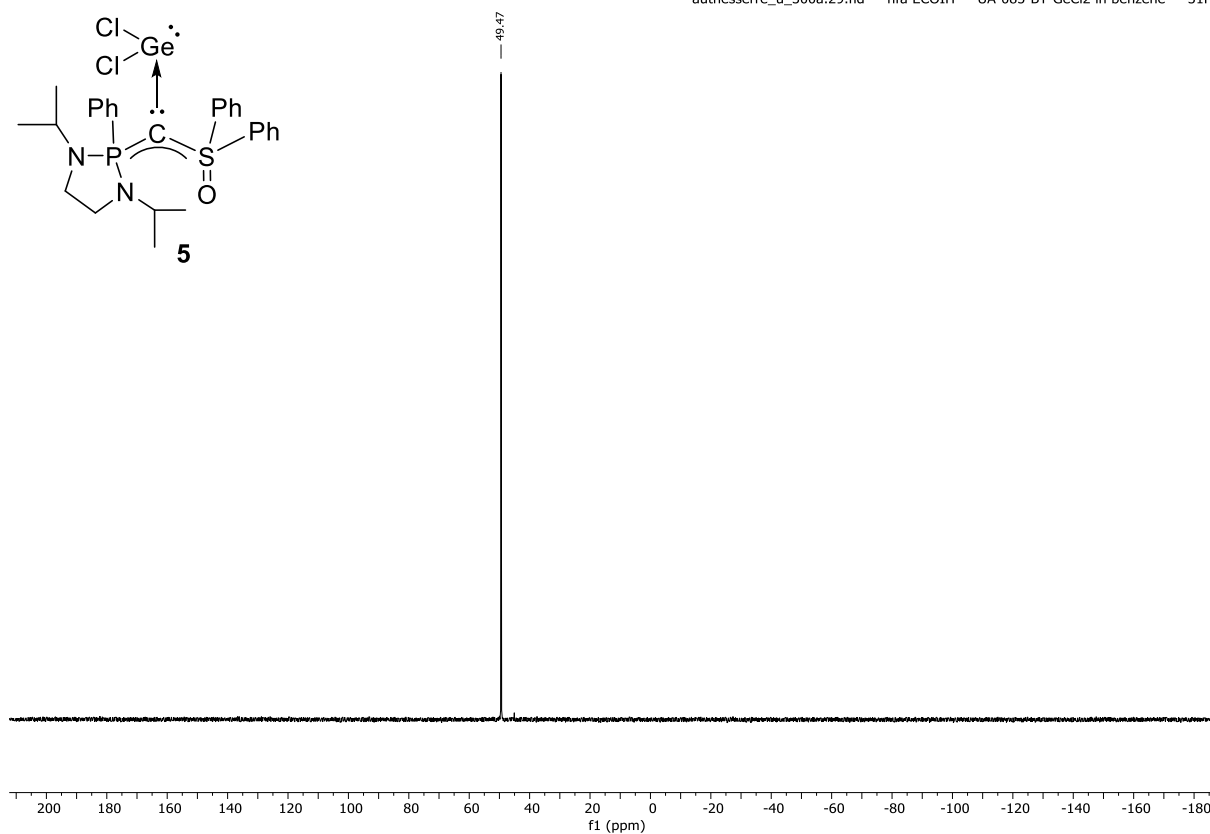

Figure S4: <sup>31</sup>P{<sup>1</sup>H} NMR (161 MHz, C<sub>6</sub>D<sub>6</sub>)

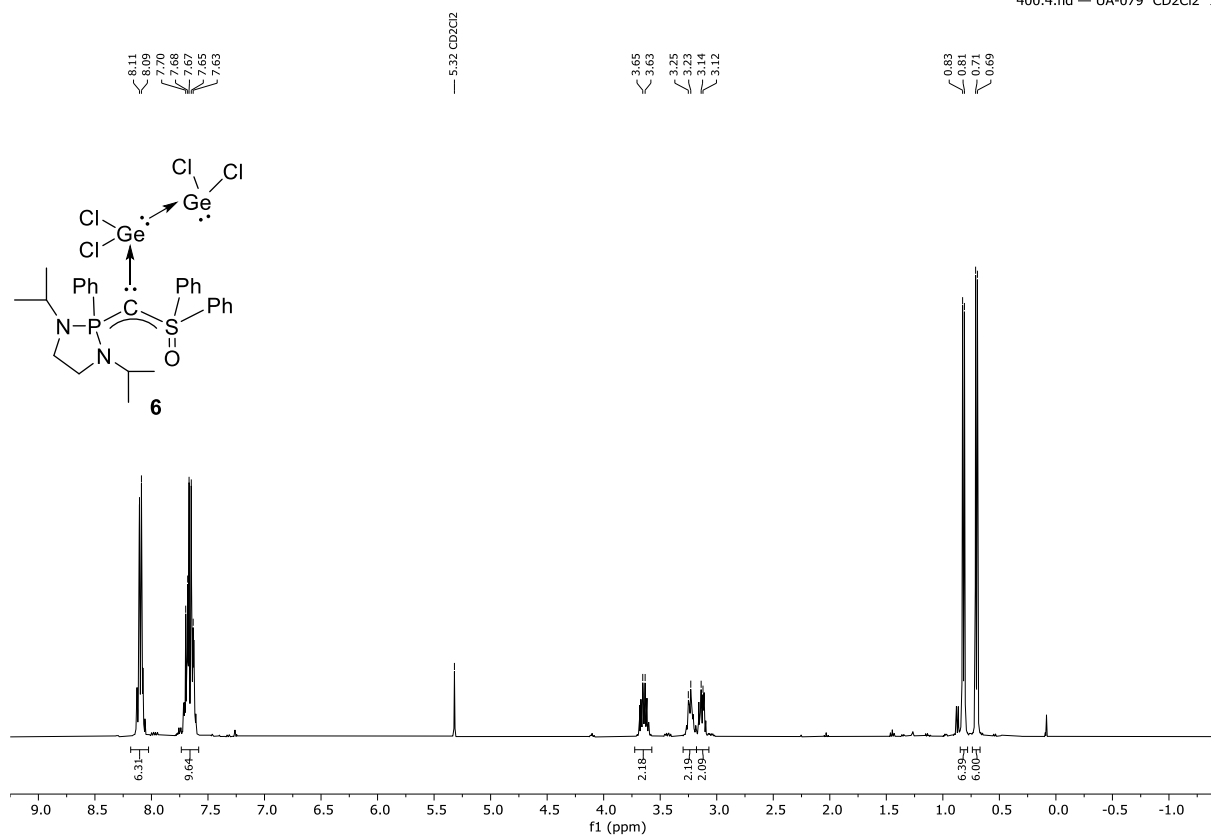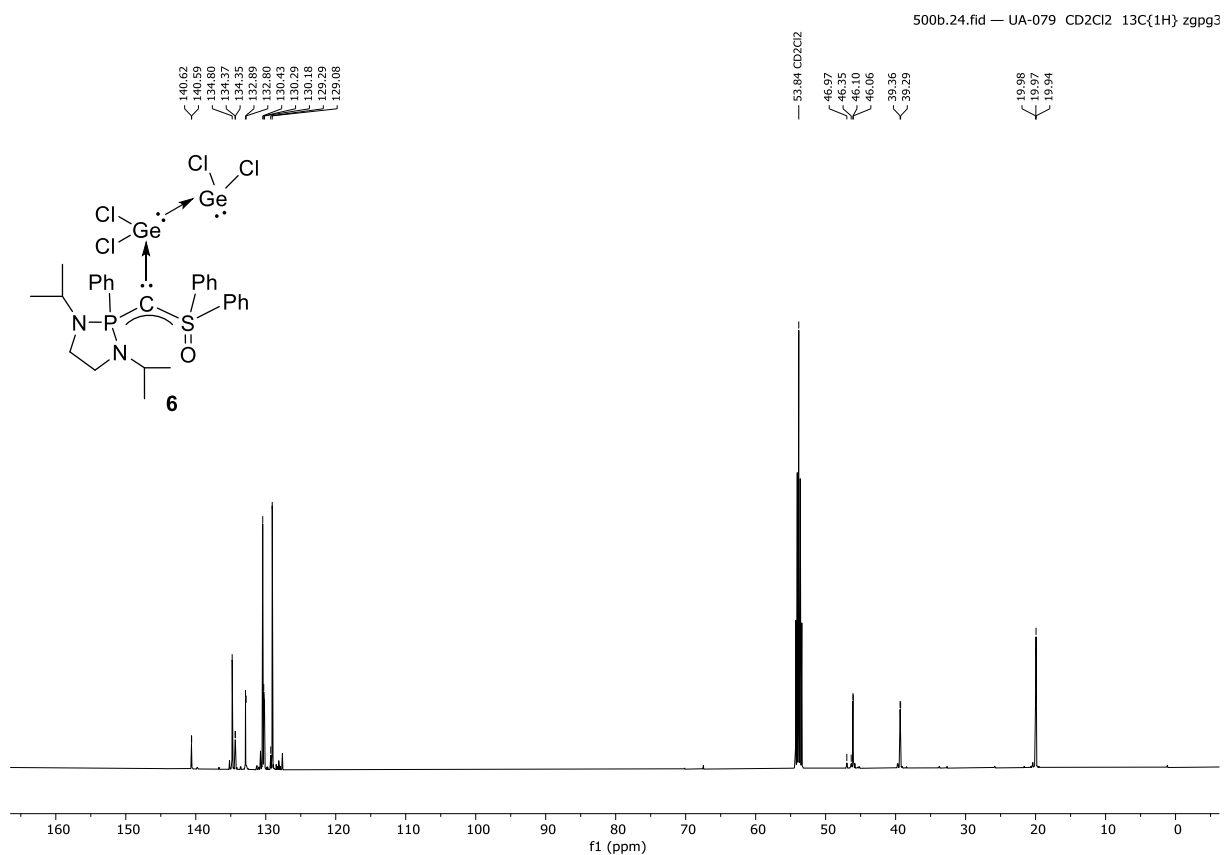

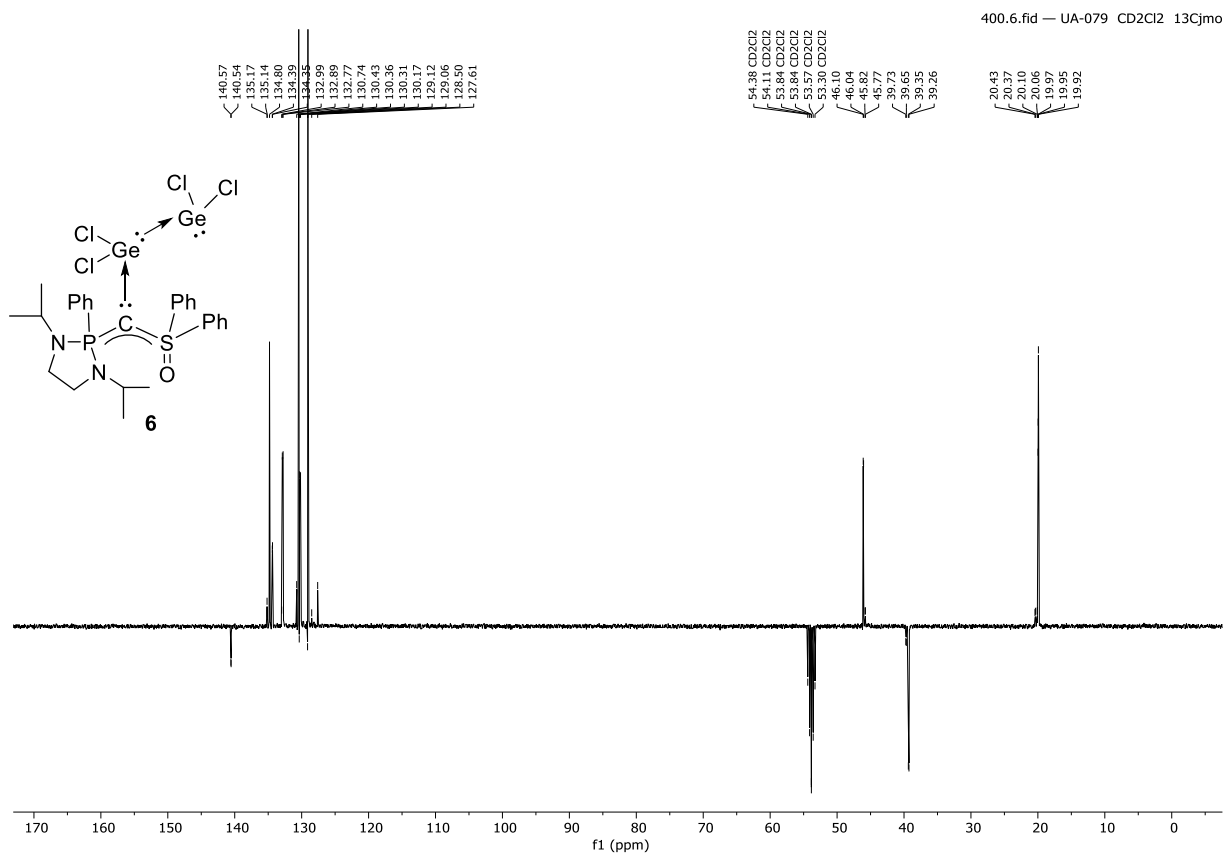

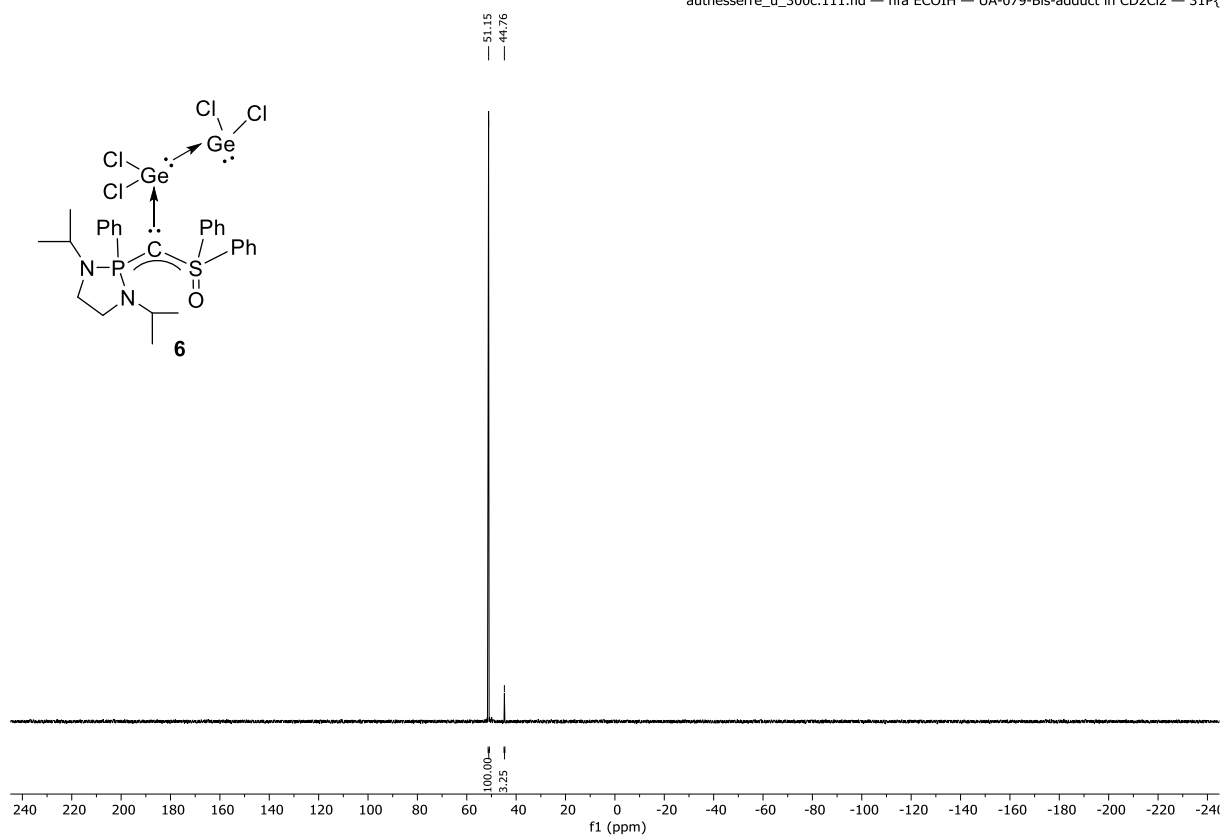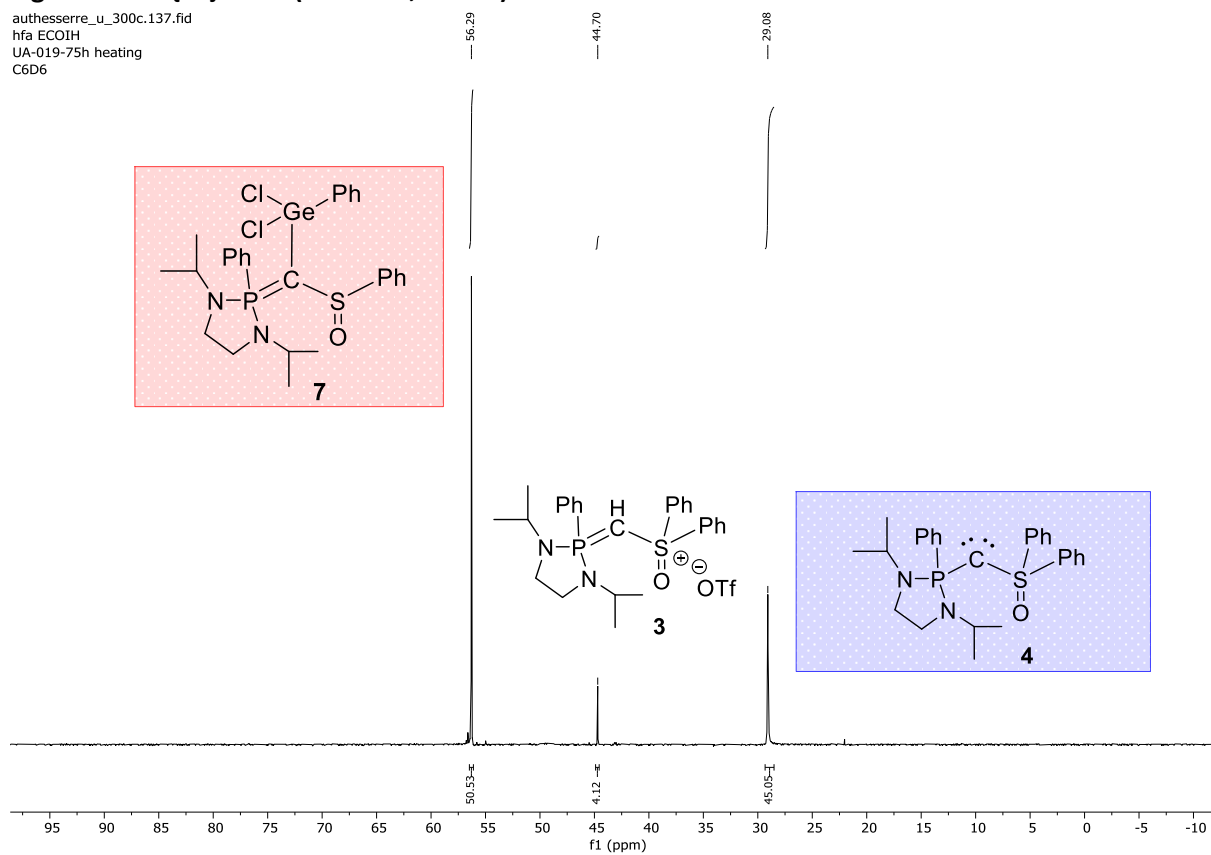

authesserre\_u\_300c.136.fid  
hfa ECOIH  
UA-019-75h heating  
C6D6

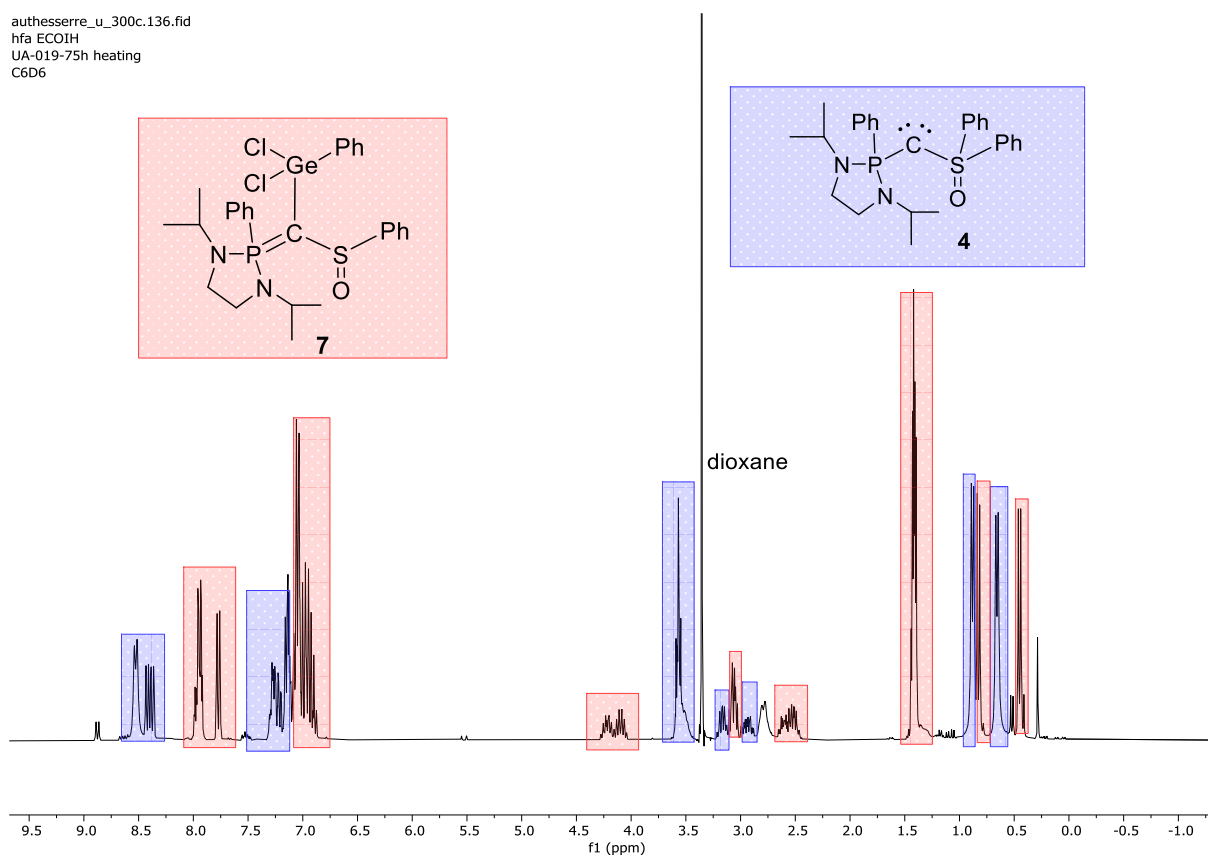

**Figure S11:**  $^1\text{H}$  NMR (300 MHz,  $\text{C}_6\text{D}_6$ )

RMN.48.fid  
UA-150 C6D6 31P{1H}

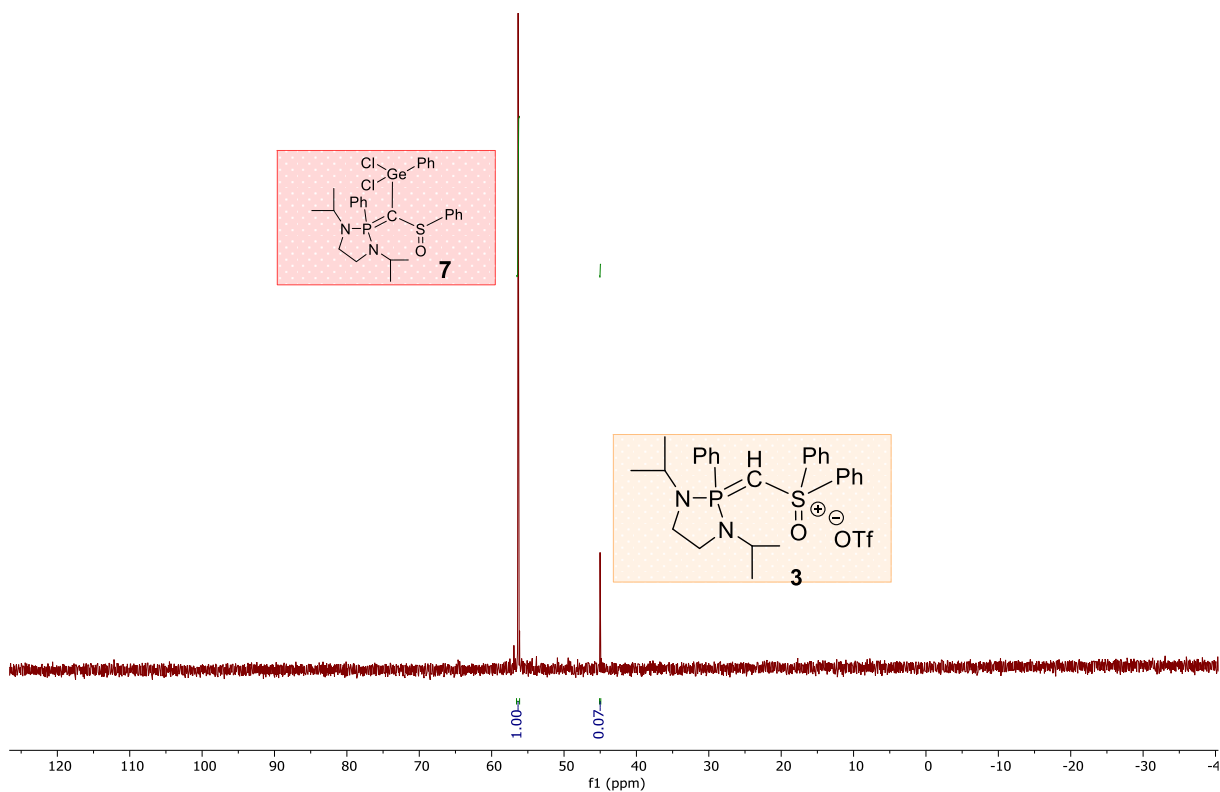

**Figure S12:**  $^{31}\text{P}\{^1\text{H}\}$  NMR (300 MHz,  $\text{C}_6\text{D}_6$ ) Migration reaction using 10 mol% of **4**, that get reprotonated into **3** at the end of the heating.



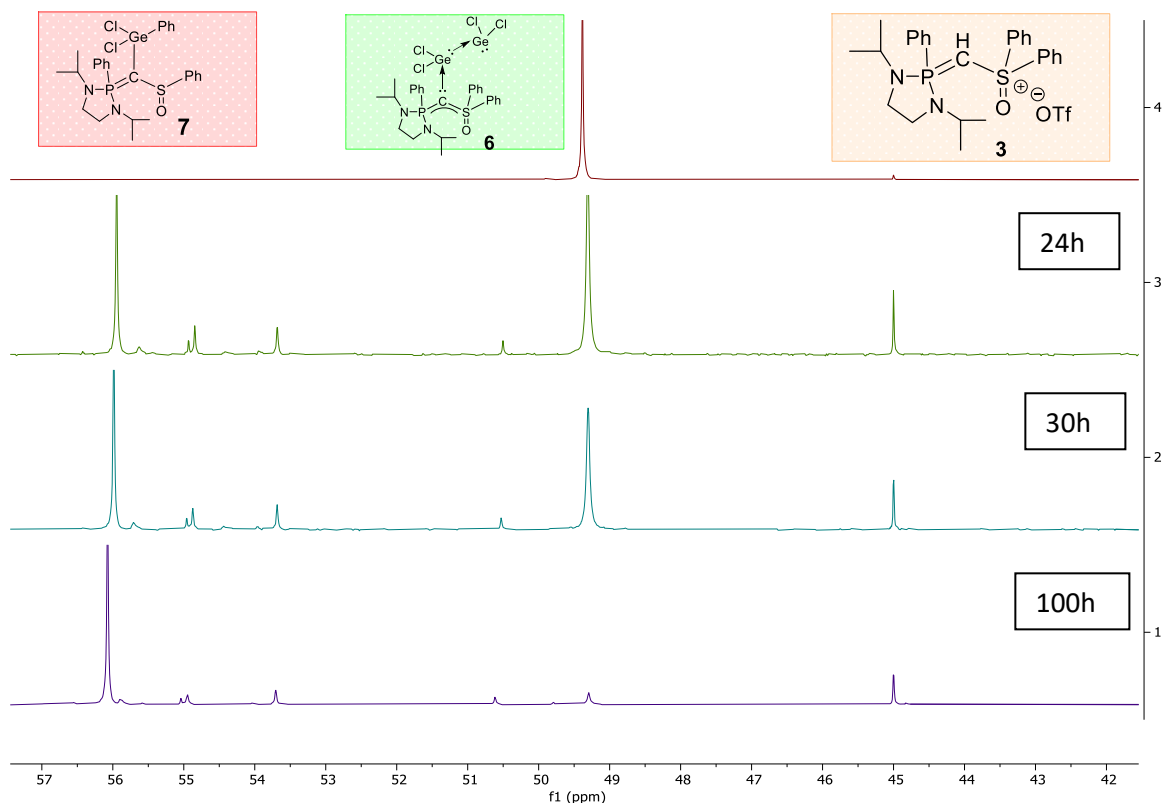

**Figure S13: Monitoring  $^{31}\text{P}\{^1\text{H}\}$  NMR (300 MHz,  $\text{C}_6\text{D}_6$ ) Migration reaction using 15 mol% of  $\text{Et}_3\text{N}$ .**

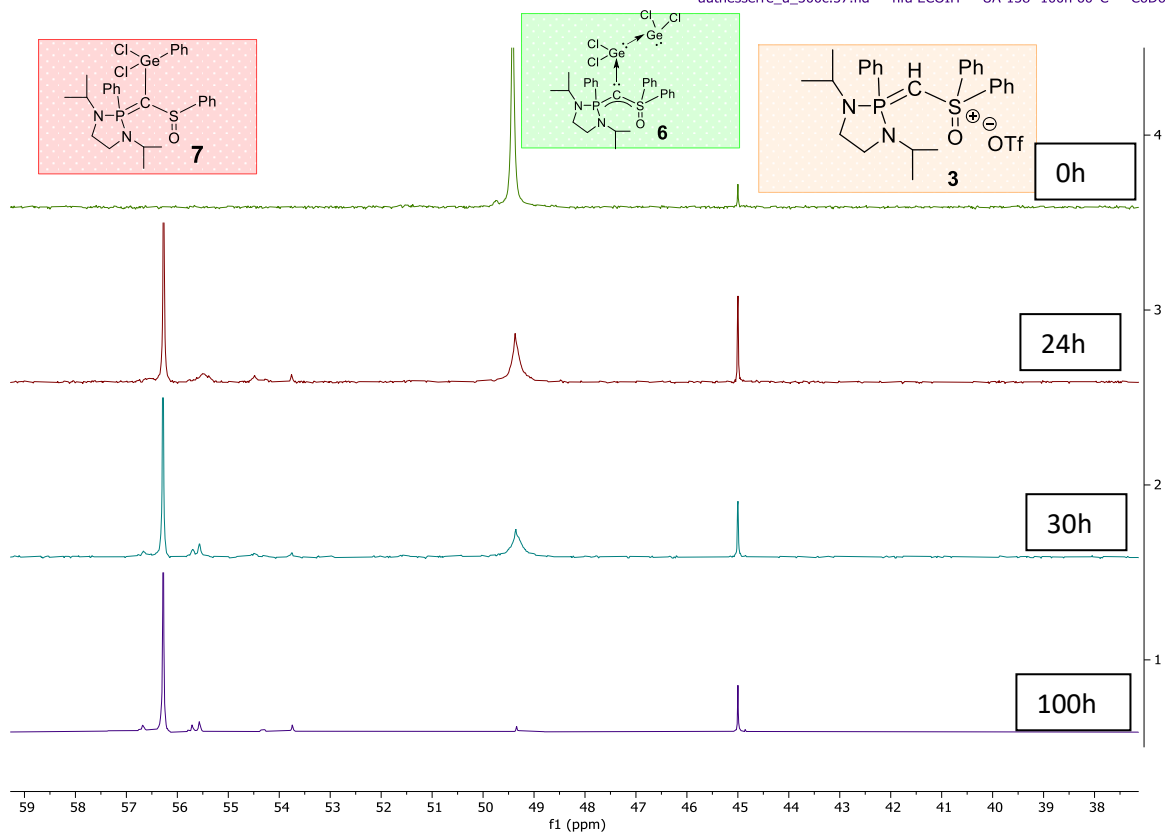

**Figure S14: Monitoring  $^{31}\text{P}\{^1\text{H}\}$  NMR (300 MHz,  $\text{C}_6\text{D}_6$ ) Migration reaction using 15 mol% of DMAP.**

## X-ray analysis

The data of the structures for **5**, **6** and **7** were collected at 193 K on a Bruker-AXS APEX II CCD Quazar diffractometer (**7**) equipped with a 30 W air-cooled microfocus source or on a Bruker-AXS D8-Venture diffractometer (**5** and **6**) equipped with a CMOS Area detector with MoK $\alpha$  radiation (wavelength = 0.71073 Å) by using phi- and omega-scans. The data were integrated with SAINT, and an empirical absorption correction with SADABS was applied [44]. The structures were solved using an intrinsic phasing method (ShelXT) [45] and refined using the least-squares method on  $F^2$  (ShelXL-2014) [46]. All non-H atoms were treated anisotropically. All H atoms attached to C atoms were fixed geometrically and treated as riding on their parent atoms with C-H = 0.95 Å (aromatic), 0.98 Å (CH<sub>3</sub>), 0.99 Å (CH<sub>2</sub>) or 1.0 Å (CH) with  $U_{\text{iso}}(\text{H}) = 1.2U_{\text{eq}}(\text{CH}, \text{CH}_2)$  or  $U_{\text{iso}}(\text{H}) = 1.5U_{\text{eq}}(\text{CH}_3)$ . Supplementary crystallographic data for CCDC-2068304 (**5**), CCDC-2068305 (**6**), CCDC-2068306 (**7**) can be obtained free of charge from The Cambridge Crystallographic Data Centre via <https://www.ccdc.cam.ac.uk/structures/>.

The details of data collection and crystal structures refinement are summarized in Table 1.

**Table S1.** Crystallographic data for the compounds **5**, **6** and **7**

| Compound                                                  | 5                                                                    | 6                                                                                  | 7                                                                     |
|-----------------------------------------------------------|----------------------------------------------------------------------|------------------------------------------------------------------------------------|-----------------------------------------------------------------------|
| Chemical formula                                          | C <sub>27</sub> H <sub>33</sub> Cl <sub>2</sub> GeN <sub>2</sub> OPS | C <sub>27</sub> H <sub>33</sub> Cl <sub>4</sub> Ge <sub>2</sub> N <sub>2</sub> OPS | C <sub>27</sub> H <sub>33</sub> Cl <sub>2</sub> Ge N <sub>2</sub> OPS |
| <i>M<sub>r</sub></i>                                      | 608.07                                                               | 751.56                                                                             | 608.07                                                                |
| Crystal system                                            | Orthorhombic                                                         | Monoclinic                                                                         | Monoclinic                                                            |
| Space group                                               | <i>P2<sub>1</sub>2<sub>1</sub>2<sub>1</sub></i>                      | <i>P2<sub>1</sub>/n</i>                                                            | <i>P2<sub>1</sub>/n</i>                                               |
| <i>a</i> [Å]                                              | 10.3934(6)                                                           | 11.2219(5)                                                                         | 9.0496(12)                                                            |
| <i>b</i> [Å]                                              | 15.3160(9)                                                           | 18.1701(7)                                                                         | 14.5792(16)                                                           |
| <i>c</i> [Å]                                              | 18.0563(11)                                                          | 15.7026(6)                                                                         | 22.036(3)                                                             |
| $\alpha$ [°]                                              | 90                                                                   | 90                                                                                 | 90                                                                    |
| $\beta$ [°]                                               | 90                                                                   | 93.4488(15)                                                                        | 90.653(4)                                                             |
| $\gamma$ [°]                                              | 90                                                                   | 90                                                                                 | 90                                                                    |
| <i>V</i> [Å <sup>3</sup> ]                                | 2874.3(3)                                                            | 3196.0(2)                                                                          | 2907.2(6)                                                             |
| <i>Z</i>                                                  | 4                                                                    | 4                                                                                  | 4                                                                     |
| $\rho$ [g cm <sup>-3</sup> ]                              | 1.405                                                                | 1.562                                                                              | 1.389                                                                 |
| $\mu$ (MoK $\alpha$ ) [mm <sup>-1</sup> ]                 | 1.403                                                                | 2.355                                                                              | 1.387                                                                 |
| Reflections collected                                     | 113982                                                               | 125271                                                                             | 72609                                                                 |
| Independent reflections                                   | 7146<br>R(int)=0.0627                                                | 9769<br>R(int)=0.0497                                                              | 5915<br>R(int)=0.1491                                                 |
| Data/<br>restraints/<br>parameters                        | 7146/0/320                                                           | 9769/0/347                                                                         | 5915/0/320                                                            |
| Crystal size [mm <sup>3</sup> ]                           | 0.460x0.200x0.160                                                    | 0.380x0.200x0.120                                                                  | 0.100x0.060x0.020                                                     |
| GOOF on <i>F</i> <sup>2</sup>                             | 1.070                                                                | 1.029                                                                              | 1.030                                                                 |
| <i>R</i> ( <i>I</i> > 2 $\sigma$ ( <i>I</i> ))            | 0.0291                                                               | 0.0306                                                                             | 0.0456                                                                |
| w <i>R</i> 2 (all data)                                   | 0.0561                                                               | 0.0741                                                                             | 0.0916                                                                |
| Largest difference peak<br>and hole, [e Å <sup>-3</sup> ] | 0.337 and -0.267                                                     | 0.666 and -0.613                                                                   | 0.343 and -0.453                                                      |
| CCDC number                                               | 2068304                                                              | 2068305                                                                            | 2068306                                                               |

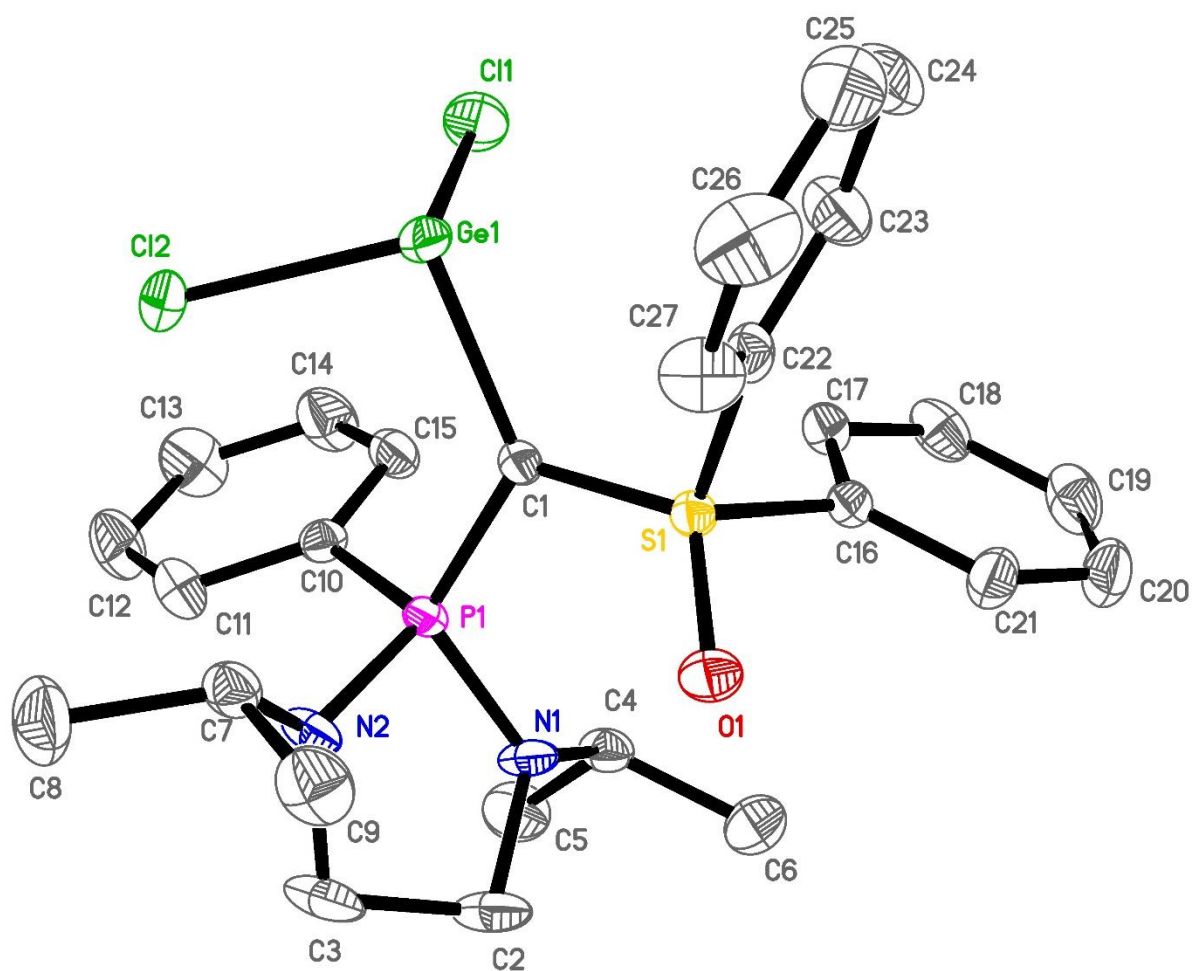

**Figure S15:** Molecular view of **5**. Thermal ellipsoids set at 50 % probability. H atoms are omitted for clarity. Selected bond lengths [Å]:

C1-Ge1 2.071(2), C1-P1 1.725(2), C1-S1 1.650(2), P1-C10 1.802(3), S1-O1 1.457(2), Ge1-Cl2 2.299(1), Ge1-Cl1 2.331(1), P1-N1 1.649(2), P1-N2 1.648(2), S1-C22 1.780(3), S1-C16 1.784(3). P1-C1-S1 113.73(14), P1-C1-Ge1 128.12(13), Ge1-C1-S1 115.65(13), C1-Ge1-Cl2 96.82(7), Cl2-Ge1-Cl1 95.37(3), Cl1-Ge1-C1 98.81(7).

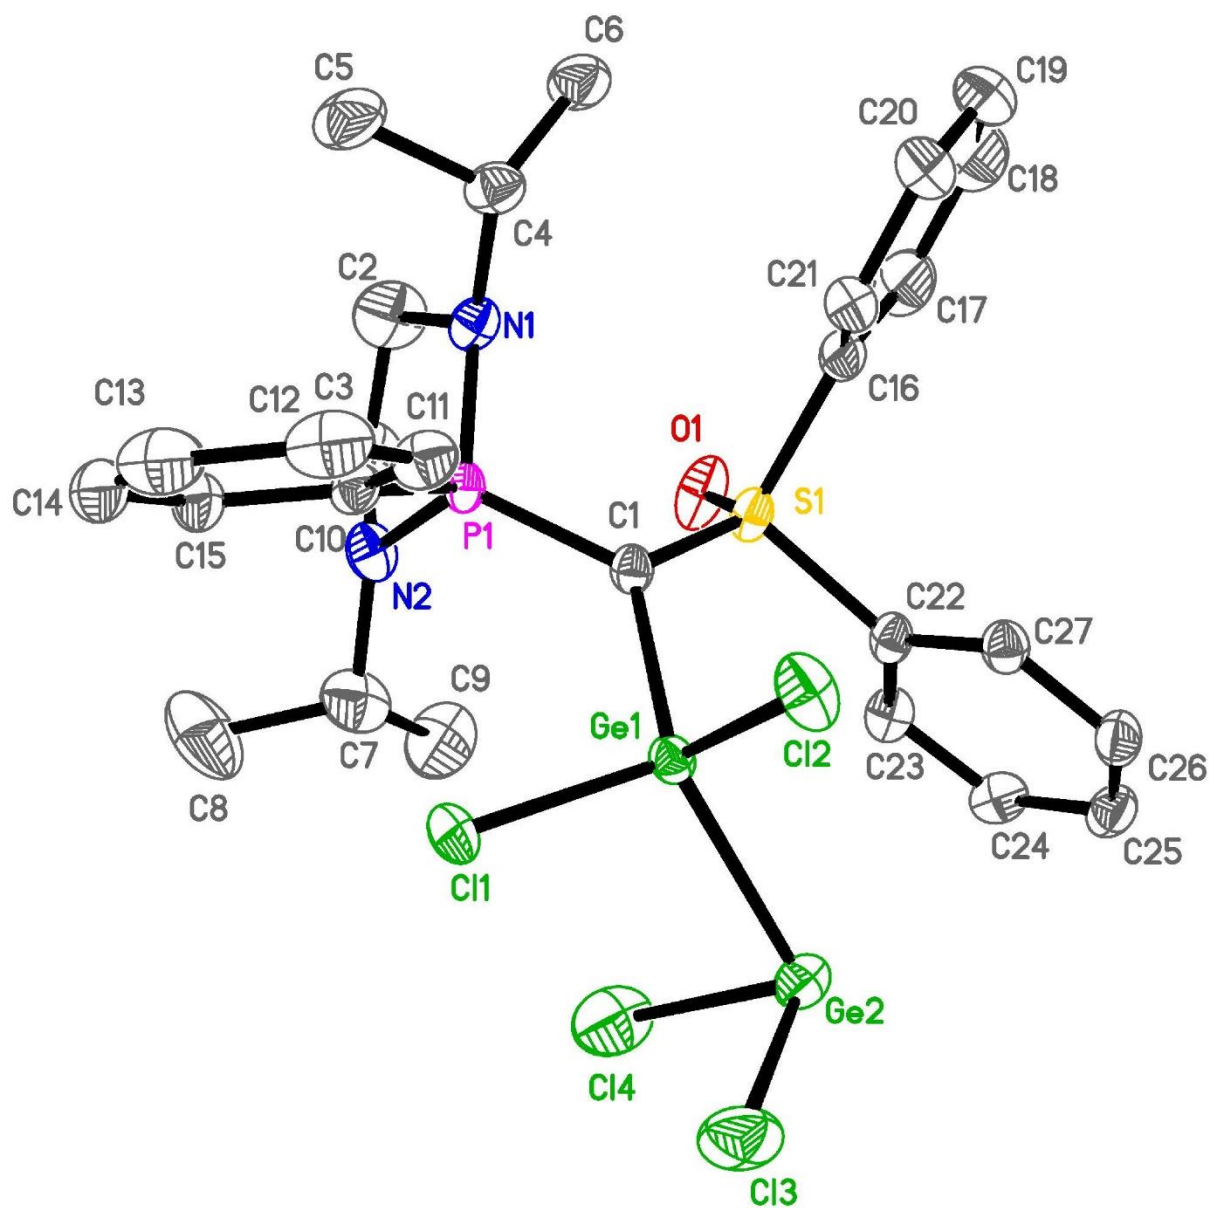

**Figure S16:** Molecular view of **6**. Thermal ellipsoids set at 50 % probability. H are omitted for clarity. Selected bond lengths [Å] and angles [°]: C1-Ge1 1.980(2), C1-P1 1.748(2), C1-S1 1.665(2), Ge1-Ge2 2.582(1), Ge1-Cl1 2.185(1), Ge1-Cl2 2.245(1), Ge2-Cl4 2.267(1), Ge2-Cl3 2.275(1), P1-C10 1.792(2), S1-O1 1.455(1), S1-C22 1.778(2), S1-C16 1.782(2), P1-C1-S1 112.40(10), P1-C1-Ge1 127.01(9), Ge1-C1-S1 117.30(9), C1-Ge1-Cl1 105.44(5), Cl1-Ge1-Cl2 101.33(2), Cl2-Ge1-Ge2 107.25(2), Cl1-Ge1-Ge2 109.25(2), Ge1-Ge2-Cl4 92.09(2), Cl4-Ge2-Cl3 98.84(3), Ge1-Ge2-Cl3 89.41(2).

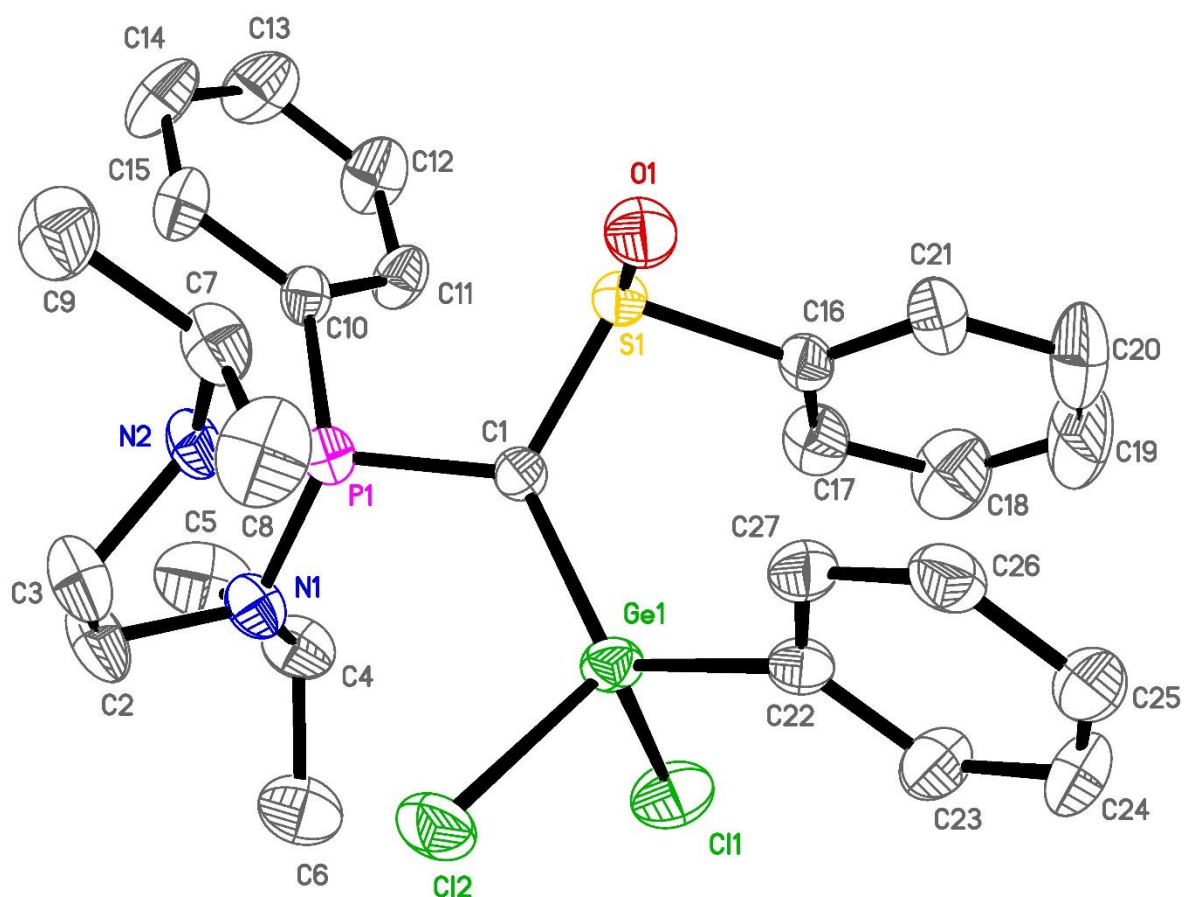

**Figure S17:** Molecular view of **7**. Thermal ellipsoids set at 50 % probability. H atoms are omitted for clarity. Selected bond lengths [Å] and angles [°]: P1-C1 1.707(3), C1-S1 1.744(3), C1-Ge1 1.891(3), Ge1-C22 1.927(3), Ge1-C22 1.927(3), Ge1-Cl2 2.172(1), Ge1-Cl1 2.173(1), P1-C10 1.805(3), S1-O1 1.499(2), S1-C16 1.800(4), P1-C1-S1 114.48(18), S1-C1-Ge1 120.89(17), Ge1-C1-P1 122.37(19), C1-Ge1-C22 119.52(14), C1-Ge1-Cl2 111.27(10), C22-Ge1-Cl2 104.77(10), C1-Ge1-Cl1 111.72(10), C22-Ge1-Cl1 106.65(11), Cl2-Ge1-Cl1 101.15(4), N1-P1-N2 94.89(15), N1-P1-C1 113.16(16), N2-P1-C1 120.48(15), N1-P1-C10 111.60(15), N2-P1-C10 108.20(16), C1-P1-C10 107.98(16), O1-S1-C1 112.64(15), O1-S1-C16 105.28(16), C1-S1-C16 100.04(16), C4-N1-C2 119.6(3), C4-N1-P1 122.2(2), C2-N1-P1 111.5(2), C3-N2-C7 120.0(3), C3-N2-P1 113.4(2), C7-N2-P1 122.5(2).
