# Supplementary material for: Complexes of Dichlorogermylene with Phosphine/Sulfoxide-Supported Carbone as Ligand
Source: Molecules. 2021 Apr 1;26(7):2005. doi: 10.3390/molecules26072005 (PMC8037485; doi:10.3390/molecules26072005)
Supplement: Supplementary file 1 [file molecules-26-02005-s001.zip › global.cif]

# 1. SUBMISSION DETAILS

_publ_requested_journal  'Molecules'

#=============================================================================
# 2. TITLE AND AUTHOR LIST
_publ_section_title
;
Complexes of Dichlorogermylene with Phosphine/Sulfoxide-Supported Carbone as 
Ligand.
;


loop_
_publ_author_name
'Ugo Authesserre'
'Sophie Hameury'
'Aymeric Dajnak'
'Nathalie Saffon-Merceron'
'Antoine Baceiredo'
'David Madec'
'Eddy Maerten '
;

; 
data_5 
  
_audit_creation_method            'SHELXL-2018/3' 
_shelx_SHELXL_version_number      '2018/3' 
_chemical_name_systematic         ? 
_chemical_name_common             ? 
_chemical_melting_point           ? 
_chemical_formula_moiety          ? 
_chemical_formula_sum 
 'C27 H33 Cl2 Ge N2 O P S' 
_chemical_formula_weight          608.07 
  
loop_ 
 _atom_type_symbol 
 _atom_type_description 
 _atom_type_scat_dispersion_real 
 _atom_type_scat_dispersion_imag 
 _atom_type_scat_source 
 'C'  'C'   0.0033   0.0016 
 'International Tables Vol C Tables 4.2.6.8 and 6.1.1.4' 
 'H'  'H'   0.0000   0.0000 
 'International Tables Vol C Tables 4.2.6.8 and 6.1.1.4' 
 'Cl'  'Cl'   0.1484   0.1585 
 'International Tables Vol C Tables 4.2.6.8 and 6.1.1.4' 
 'Ge'  'Ge'   0.1547   1.8001 
 'International Tables Vol C Tables 4.2.6.8 and 6.1.1.4' 
 'N'  'N'   0.0061   0.0033 
 'International Tables Vol C Tables 4.2.6.8 and 6.1.1.4' 
 'O'  'O'   0.0106   0.0060 
 'International Tables Vol C Tables 4.2.6.8 and 6.1.1.4' 
 'P'  'P'   0.1023   0.0942 
 'International Tables Vol C Tables 4.2.6.8 and 6.1.1.4' 
 'S'  'S'   0.1246   0.1234 
 'International Tables Vol C Tables 4.2.6.8 and 6.1.1.4' 
  
_space_group_crystal_system       orthorhombic 
_space_group_IT_number            19 
_space_group_name_H-M_alt         'P 21 21 21' 
_space_group_name_Hall            'P 2ac 2ab' 
  
_shelx_space_group_comment 
; 
The symmetry employed for this shelxl refinement is uniquely defined 
by the following loop, which should always be used as a source of 
symmetry information in preference to the above space-group names. 
They are only intended as comments. 
; 
  
loop_ 
 _space_group_symop_operation_xyz 
 'x, y, z' 
 '-x+1/2, -y, z+1/2' 
 '-x, y+1/2, -z+1/2' 
 'x+1/2, -y+1/2, -z' 
  
_cell_length_a                    10.3934(6) 
_cell_length_b                    15.3160(9) 
_cell_length_c                    18.0563(11) 
_cell_angle_alpha                 90 
_cell_angle_beta                  90 
_cell_angle_gamma                 90 
_cell_volume                      2874.3(3) 
_cell_formula_units_Z             4 
_cell_measurement_temperature     193(2) 
_cell_measurement_reflns_used     9614 
_cell_measurement_theta_min       2.99 
_cell_measurement_theta_max       28.27 
  
_exptl_crystal_description        needle 
_exptl_crystal_colour             colourless 
_exptl_crystal_density_meas       ? 
_exptl_crystal_density_method     ? 
_exptl_crystal_density_diffrn     1.405 
_exptl_crystal_F_000              1256 
_exptl_transmission_factor_min    ? 
_exptl_transmission_factor_max    ? 
_exptl_crystal_size_max           0.460 
_exptl_crystal_size_mid           0.200 
_exptl_crystal_size_min           0.160 
_exptl_absorpt_coefficient_mu     1.403 
_shelx_estimated_absorpt_T_min    0.565 
_shelx_estimated_absorpt_T_max    0.807 
_exptl_absorpt_correction_type    'multi-scan' 
_exptl_absorpt_correction_T_min   0.6163  
_exptl_absorpt_correction_T_max   0.7457  
_exptl_absorpt_process_details    'SADABS (Bruker-AXS)' 
_exptl_absorpt_special_details    ? 
_diffrn_ambient_temperature       193(2) 
_diffrn_radiation_wavelength      0.71073 
_diffrn_radiation_type            MoK\a 
_diffrn_source                    'fine-focus sealed tube' 
_diffrn_measurement_device_type   'Bruker D8-Venture CMOS detector' 
_diffrn_measurement_method        'phi and omega scans' 
_diffrn_detector_area_resol_mean  ? 
_diffrn_reflns_number             113982 
_diffrn_reflns_av_unetI/netI      0.0269 
_diffrn_reflns_av_R_equivalents   0.0627 
_diffrn_reflns_limit_h_min        -13 
_diffrn_reflns_limit_h_max        13 
_diffrn_reflns_limit_k_min        -20 
_diffrn_reflns_limit_k_max        20 
_diffrn_reflns_limit_l_min        -24 
_diffrn_reflns_limit_l_max        24 
_diffrn_reflns_theta_min          2.989 
_diffrn_reflns_theta_max          28.319 
_diffrn_reflns_theta_full         25.242 
_diffrn_measured_fraction_theta_max   0.998 
_diffrn_measured_fraction_theta_full  0.997 
_diffrn_reflns_Laue_measured_fraction_max    0.998 
_diffrn_reflns_Laue_measured_fraction_full   0.997 
_diffrn_reflns_point_group_measured_fraction_max   0.998 
_diffrn_reflns_point_group_measured_fraction_full  0.998 
_reflns_number_total              7146 
_reflns_number_gt                 6501 
_reflns_threshold_expression      'I > 2\s(I)' 
_reflns_Friedel_coverage          0.790 
_reflns_Friedel_fraction_max      0.999 
_reflns_Friedel_fraction_full     1.000 
  
_reflns_special_details 
; 
 Reflections were merged by SHELXL according to the crystal 
 class for the calculation of statistics and refinement. 
  
 _reflns_Friedel_fraction is defined as the number of unique 
 Friedel pairs measured divided by the number that would be 
 possible theoretically, ignoring centric projections and 
 systematic absences. 
; 
  
_computing_data_collection        'Bruker APEX3' 
_computing_cell_refinement        'Bruker SAINT' 
_computing_data_reduction         'Bruker SAINT' 
_computing_structure_solution     'SHELXT (Sheldrick 2015)' 
_computing_structure_refinement 'SHELXL-2018/3 (Sheldrick, 2018)' 
_computing_molecular_graphics     'Bruker SHELXTL' 
_computing_publication_material   'Bruker SHELXTL' 
_refine_special_details           ? 
_refine_ls_structure_factor_coef  Fsqd 
_refine_ls_matrix_type            full 
_refine_ls_weighting_scheme       calc 
_refine_ls_weighting_details 
'w=1/[\s^2^(Fo^2^)+(0.0233P)^2^+1.0769P] where P=(Fo^2^+2Fc^2^)/3' 
_atom_sites_solution_primary      ? 
_atom_sites_solution_secondary    ? 
_atom_sites_solution_hydrogens    geom 
_refine_ls_hydrogen_treatment     constr 
_refine_ls_extinction_method      none 
_refine_ls_extinction_coef        . 
_refine_ls_abs_structure_details 
; 
 Flack x determined using 2628 quotients [(I+)-(I-)]/[(I+)+(I-)] 
 (Parsons, Flack and Wagner, Acta Cryst. B69 (2013) 249-259). 
; 
_refine_ls_abs_structure_Flack    -0.010(3) 
_chemical_absolute_configuration  ad 
_refine_ls_number_reflns          7146 
_refine_ls_number_parameters      320 
_refine_ls_number_restraints      0 
_refine_ls_R_factor_all           0.0365 
_refine_ls_R_factor_gt            0.0291 
_refine_ls_wR_factor_ref          0.0561 
_refine_ls_wR_factor_gt           0.0541 
_refine_ls_goodness_of_fit_ref    1.070 
_refine_ls_restrained_S_all       1.070 
_refine_ls_shift/su_max           0.001 
_refine_ls_shift/su_mean          0.000 
  
loop_ 
 _atom_site_label 
 _atom_site_type_symbol 
 _atom_site_fract_x 
 _atom_site_fract_y 
 _atom_site_fract_z 
 _atom_site_U_iso_or_equiv 
 _atom_site_adp_type 
 _atom_site_occupancy 
 _atom_site_site_symmetry_order 
 _atom_site_calc_flag 
 _atom_site_refinement_flags_posn 
 _atom_site_refinement_flags_adp 
 _atom_site_refinement_flags_occupancy 
 _atom_site_disorder_assembly 
 _atom_site_disorder_group 
Ge1 Ge 0.39566(3) 0.46857(2) 0.34230(2) 0.02365(8) Uani 1 1 d . . . . . 
Cl1 Cl 0.25669(7) 0.57718(6) 0.30018(5) 0.0413(2) Uani 1 1 d . . . . . 
Cl2 Cl 0.43596(7) 0.41057(5) 0.22717(4) 0.02939(16) Uani 1 1 d . . . . . 
P1 P 0.67812(6) 0.55893(4) 0.28307(4) 0.01516(13) Uani 1 1 d . . . . . 
S1 S 0.61243(6) 0.56313(4) 0.43496(3) 0.01614(12) Uani 1 1 d . . . . . 
O1 O 0.74418(17) 0.54204(13) 0.45590(10) 0.0256(4) Uani 1 1 d . . . . . 
N1 N 0.79037(19) 0.63301(14) 0.29786(14) 0.0218(5) Uani 1 1 d . . . . . 
N2 N 0.77937(19) 0.47724(15) 0.27170(13) 0.0208(5) Uani 1 1 d . . . . . 
C1 C 0.5624(2) 0.54201(16) 0.35007(13) 0.0166(5) Uani 1 1 d . . . . . 
C2 C 0.9205(2) 0.5943(2) 0.3008(2) 0.0321(7) Uani 1 1 d . . . . . 
H2A H 0.946297 0.583001 0.352702 0.039 Uiso 1 1 calc R U . . . 
H2B H 0.984308 0.633956 0.277864 0.039 Uiso 1 1 calc R U . . . 
C3 C 0.9110(3) 0.50957(19) 0.25770(19) 0.0342(7) Uani 1 1 d . . . . . 
H3A H 0.924735 0.519958 0.204158 0.041 Uiso 1 1 calc R U . . . 
H3B H 0.975828 0.467009 0.275369 0.041 Uiso 1 1 calc R U . . . 
C4 C 0.7754(3) 0.72785(17) 0.28684(16) 0.0225(6) Uani 1 1 d . . . . . 
H4 H 0.681360 0.741393 0.289294 0.027 Uiso 1 1 calc R U . . . 
C5 C 0.8238(3) 0.7572(2) 0.21120(18) 0.0350(7) Uani 1 1 d . . . . . 
H5A H 0.915724 0.743833 0.206778 0.053 Uiso 1 1 calc R U . . . 
H5B H 0.810775 0.820281 0.205862 0.053 Uiso 1 1 calc R U . . . 
H5C H 0.776199 0.726460 0.172309 0.053 Uiso 1 1 calc R U . . . 
C6 C 0.8411(3) 0.7778(2) 0.34900(19) 0.0358(7) Uani 1 1 d . . . . . 
H6A H 0.806763 0.758373 0.396780 0.054 Uiso 1 1 calc R U . . . 
H6B H 0.824807 0.840474 0.342951 0.054 Uiso 1 1 calc R U . . . 
H6C H 0.933914 0.766926 0.347324 0.054 Uiso 1 1 calc R U . . . 
C7 C 0.7572(3) 0.38556(17) 0.29205(16) 0.0230(6) Uani 1 1 d . . . . . 
H7 H 0.664373 0.379756 0.305754 0.028 Uiso 1 1 calc R U . . . 
C8 C 0.7812(4) 0.3258(2) 0.2264(2) 0.0426(9) Uani 1 1 d . . . . . 
H8A H 0.721567 0.340647 0.186277 0.064 Uiso 1 1 calc R U . . . 
H8B H 0.767546 0.264998 0.241389 0.064 Uiso 1 1 calc R U . . . 
H8C H 0.869922 0.333157 0.209139 0.064 Uiso 1 1 calc R U . . . 
C9 C 0.8361(3) 0.3588(2) 0.35934(17) 0.0346(7) Uani 1 1 d . . . . . 
H9A H 0.927776 0.360369 0.346837 0.052 Uiso 1 1 calc R U . . . 
H9B H 0.812116 0.299473 0.374312 0.052 Uiso 1 1 calc R U . . . 
H9C H 0.819035 0.399295 0.400196 0.052 Uiso 1 1 calc R U . . . 
C10 C 0.5991(2) 0.58839(16) 0.19779(13) 0.0182(5) Uani 1 1 d . . . . . 
C11 C 0.6382(3) 0.55108(18) 0.13119(15) 0.0264(6) Uani 1 1 d . . . . . 
H11 H 0.700789 0.505854 0.131280 0.032 Uiso 1 1 calc R U . . . 
C12 C 0.5865(3) 0.5795(2) 0.06502(16) 0.0364(7) Uani 1 1 d . . . . . 
H12 H 0.610995 0.552264 0.019896 0.044 Uiso 1 1 calc R U . . . 
C13 C 0.4990(3) 0.6476(2) 0.06436(19) 0.0402(8) Uani 1 1 d . . . . . 
H13 H 0.464460 0.667715 0.018723 0.048 Uiso 1 1 calc R U . . . 
C14 C 0.4620(3) 0.6864(2) 0.12987(18) 0.0366(8) Uani 1 1 d . . . . . 
H14 H 0.403477 0.734003 0.129306 0.044 Uiso 1 1 calc R U . . . 
C15 C 0.5100(3) 0.65587(19) 0.19635(16) 0.0252(6) Uani 1 1 d . . . . . 
H15 H 0.481751 0.681306 0.241494 0.030 Uiso 1 1 calc R U . . . 
C16 C 0.5894(3) 0.67469(17) 0.46019(14) 0.0182(5) Uani 1 1 d . . . . . 
C17 C 0.5099(3) 0.72861(18) 0.41930(16) 0.0222(6) Uani 1 1 d . . . . . 
H17 H 0.464626 0.707063 0.377430 0.027 Uiso 1 1 calc R U . . . 
C18 C 0.4982(3) 0.81547(19) 0.44118(18) 0.0292(7) Uani 1 1 d . . . . . 
H18 H 0.445238 0.854200 0.413603 0.035 Uiso 1 1 calc R U . . . 
C19 C 0.5629(3) 0.8453(2) 0.50250(18) 0.0351(7) Uani 1 1 d . . . . . 
H19 H 0.554103 0.904700 0.516775 0.042 Uiso 1 1 calc R U . . . 
C20 C 0.6399(3) 0.7910(2) 0.54352(18) 0.0343(8) Uani 1 1 d . . . . . 
H20 H 0.683191 0.812493 0.586115 0.041 Uiso 1 1 calc R U . . . 
C21 C 0.6540(3) 0.7044(2) 0.52235(16) 0.0272(6) Uani 1 1 d . . . . . 
H21 H 0.707284 0.666093 0.550107 0.033 Uiso 1 1 calc R U . . . 
C22 C 0.5073(3) 0.50752(17) 0.49691(14) 0.0200(6) Uani 1 1 d . . . . . 
C23 C 0.3940(3) 0.54394(19) 0.52279(16) 0.0320(6) Uani 1 1 d . . . . . 
H23 H 0.367885 0.600416 0.507066 0.038 Uiso 1 1 calc R U . . . 
C24 C 0.3190(3) 0.4964(2) 0.5722(2) 0.0428(9) Uani 1 1 d . . . . . 
H24 H 0.241149 0.520403 0.590765 0.051 Uiso 1 1 calc R U . . . 
C25 C 0.3578(4) 0.4144(2) 0.59419(19) 0.0421(9) Uani 1 1 d . . . . . 
H25 H 0.306421 0.382358 0.628147 0.050 Uiso 1 1 calc R U . . . 
C26 C 0.4698(4) 0.3784(2) 0.5677(2) 0.0444(9) Uani 1 1 d . . . . . 
H26 H 0.494989 0.321602 0.583019 0.053 Uiso 1 1 calc R U . . . 
C27 C 0.5458(3) 0.4248(2) 0.51875(18) 0.0332(7) Uani 1 1 d . . . . . 
H27 H 0.623425 0.400235 0.500314 0.040 Uiso 1 1 calc R U . . . 
  
loop_ 
 _atom_site_aniso_label 
 _atom_site_aniso_U_11 
 _atom_site_aniso_U_22 
 _atom_site_aniso_U_33 
 _atom_site_aniso_U_23 
 _atom_site_aniso_U_13 
 _atom_site_aniso_U_12 
Ge1 0.01861(13) 0.03141(15) 0.02091(13) -0.00499(12) 0.00295(12) -0.00909(12) 
Cl1 0.0192(3) 0.0516(5) 0.0530(5) -0.0195(4) -0.0049(3) 0.0101(3) 
Cl2 0.0294(3) 0.0296(4) 0.0291(4) -0.0136(3) 0.0027(3) -0.0069(3) 
P1 0.0122(3) 0.0159(3) 0.0173(3) -0.0014(2) 0.0020(2) 0.0014(2) 
S1 0.0142(3) 0.0185(3) 0.0157(3) -0.0011(2) -0.0007(2) 0.0017(3) 
O1 0.0174(9) 0.0323(11) 0.0271(10) -0.0014(9) -0.0043(8) 0.0052(8) 
N1 0.0102(10) 0.0198(11) 0.0353(14) 0.0008(10) -0.0016(9) -0.0007(8) 
N2 0.0154(10) 0.0192(11) 0.0280(12) 0.0020(10) 0.0073(9) 0.0047(9) 
C1 0.0142(10) 0.0215(12) 0.0140(11) -0.0027(10) 0.0005(9) 0.0012(9) 
C2 0.0122(13) 0.0318(15) 0.0523(19) 0.0054(15) -0.0014(13) 0.0024(11) 
C3 0.0156(13) 0.0311(16) 0.056(2) 0.0041(14) 0.0124(13) 0.0048(12) 
C4 0.0172(12) 0.0196(13) 0.0306(15) -0.0003(11) 0.0032(11) -0.0017(10) 
C5 0.0340(17) 0.0330(16) 0.0380(18) 0.0073(14) 0.0069(15) -0.0041(14) 
C6 0.0316(15) 0.0338(16) 0.0419(19) -0.0069(15) 0.0014(15) -0.0115(13) 
C7 0.0206(13) 0.0189(13) 0.0296(15) -0.0013(11) 0.0018(12) 0.0032(11) 
C8 0.051(2) 0.0324(17) 0.045(2) -0.0161(15) -0.0057(17) 0.0114(15) 
C9 0.0368(17) 0.0320(16) 0.0350(18) 0.0039(13) -0.0021(14) 0.0111(14) 
C10 0.0162(11) 0.0204(12) 0.0180(12) 0.0009(10) -0.0001(11) -0.0026(11) 
C11 0.0312(16) 0.0244(15) 0.0237(13) 0.0001(11) 0.0068(11) 0.0053(11) 
C12 0.0453(19) 0.0452(18) 0.0189(14) -0.0023(13) 0.0072(14) 0.0063(16) 
C13 0.043(2) 0.055(2) 0.0228(16) 0.0085(16) -0.0037(14) 0.0107(17) 
C14 0.0344(17) 0.0448(19) 0.0305(17) 0.0003(15) -0.0022(14) 0.0150(15) 
C15 0.0205(13) 0.0318(15) 0.0233(14) -0.0037(12) 0.0012(11) 0.0053(12) 
C16 0.0177(13) 0.0195(12) 0.0174(12) -0.0025(9) 0.0026(10) -0.0022(10) 
C17 0.0228(14) 0.0242(14) 0.0197(14) -0.0022(11) 0.0026(11) -0.0005(11) 
C18 0.0354(17) 0.0225(14) 0.0296(16) 0.0043(12) 0.0118(13) 0.0045(12) 
C19 0.0466(19) 0.0220(15) 0.0366(18) -0.0083(13) 0.0142(15) -0.0084(14) 
C20 0.0392(19) 0.0353(17) 0.0285(16) -0.0127(13) 0.0011(13) -0.0105(14) 
C21 0.0287(15) 0.0320(16) 0.0209(14) -0.0038(12) -0.0024(12) -0.0058(12) 
C22 0.0244(13) 0.0220(14) 0.0135(12) -0.0012(10) 0.0004(10) -0.0031(11) 
C23 0.0354(15) 0.0243(15) 0.0363(16) -0.0024(12) 0.0132(14) -0.0013(14) 
C24 0.0407(19) 0.0429(19) 0.045(2) -0.0100(16) 0.0224(17) -0.0108(16) 
C25 0.052(2) 0.043(2) 0.0313(17) 0.0063(15) 0.0077(15) -0.0206(16) 
C26 0.049(2) 0.0355(18) 0.048(2) 0.0195(17) -0.0072(18) -0.0077(16) 
C27 0.0322(16) 0.0296(16) 0.0378(18) 0.0095(14) -0.0010(14) 0.0017(14) 
  
_geom_special_details 
; 
 All esds (except the esd in the dihedral angle between two l.s. planes) 
 are estimated using the full covariance matrix.  The cell esds are taken 
 into account individually in the estimation of esds in distances, angles 
 and torsion angles; correlations between esds in cell parameters are only 
 used when they are defined by crystal symmetry.  An approximate (isotropic) 
 treatment of cell esds is used for estimating esds involving l.s. planes. 
; 
  
loop_ 
 _geom_bond_atom_site_label_1 
 _geom_bond_atom_site_label_2 
 _geom_bond_distance 
 _geom_bond_site_symmetry_2 
 _geom_bond_publ_flag 
Ge1 C1 2.071(2) . ? 
Ge1 Cl2 2.2991(8) . ? 
Ge1 Cl1 2.3307(9) . ? 
P1 N2 1.648(2) . ? 
P1 N1 1.649(2) . ? 
P1 C1 1.725(2) . ? 
P1 C10 1.802(3) . ? 
S1 O1 1.4568(19) . ? 
S1 C1 1.650(2) . ? 
S1 C22 1.780(3) . ? 
S1 C16 1.784(3) . ? 
N1 C4 1.475(3) . ? 
N1 C2 1.477(3) . ? 
N2 C7 1.470(3) . ? 
N2 C3 1.477(3) . ? 
C2 C3 1.517(4) . ? 
C2 H2A 0.9900 . ? 
C2 H2B 0.9900 . ? 
C3 H3A 0.9900 . ? 
C3 H3B 0.9900 . ? 
C4 C6 1.520(4) . ? 
C4 C5 1.524(4) . ? 
C4 H4 1.0000 . ? 
C5 H5A 0.9800 . ? 
C5 H5B 0.9800 . ? 
C5 H5C 0.9800 . ? 
C6 H6A 0.9800 . ? 
C6 H6B 0.9800 . ? 
C6 H6C 0.9800 . ? 
C7 C8 1.518(4) . ? 
C7 C9 1.522(4) . ? 
C7 H7 1.0000 . ? 
C8 H8A 0.9800 . ? 
C8 H8B 0.9800 . ? 
C8 H8C 0.9800 . ? 
C9 H9A 0.9800 . ? 
C9 H9B 0.9800 . ? 
C9 H9C 0.9800 . ? 
C10 C15 1.388(4) . ? 
C10 C11 1.392(4) . ? 
C11 C12 1.381(4) . ? 
C11 H11 0.9500 . ? 
C12 C13 1.384(5) . ? 
C12 H12 0.9500 . ? 
C13 C14 1.378(5) . ? 
C13 H13 0.9500 . ? 
C14 C15 1.381(4) . ? 
C14 H14 0.9500 . ? 
C15 H15 0.9500 . ? 
C16 C17 1.381(4) . ? 
C16 C21 1.385(4) . ? 
C17 C18 1.393(4) . ? 
C17 H17 0.9500 . ? 
C18 C19 1.374(5) . ? 
C18 H18 0.9500 . ? 
C19 C20 1.371(5) . ? 
C19 H19 0.9500 . ? 
C20 C21 1.388(4) . ? 
C20 H20 0.9500 . ? 
C21 H21 0.9500 . ? 
C22 C23 1.385(4) . ? 
C22 C27 1.387(4) . ? 
C23 C24 1.391(4) . ? 
C23 H23 0.9500 . ? 
C24 C25 1.377(5) . ? 
C24 H24 0.9500 . ? 
C25 C26 1.374(5) . ? 
C25 H25 0.9500 . ? 
C26 C27 1.381(5) . ? 
C26 H26 0.9500 . ? 
C27 H27 0.9500 . ? 
  
loop_ 
 _geom_angle_atom_site_label_1 
 _geom_angle_atom_site_label_2 
 _geom_angle_atom_site_label_3 
 _geom_angle 
 _geom_angle_site_symmetry_1 
 _geom_angle_site_symmetry_3 
 _geom_angle_publ_flag 
C1 Ge1 Cl2 96.82(7) . . ? 
C1 Ge1 Cl1 98.81(7) . . ? 
Cl2 Ge1 Cl1 95.37(3) . . ? 
N2 P1 N1 95.21(11) . . ? 
N2 P1 C1 114.73(12) . . ? 
N1 P1 C1 118.87(12) . . ? 
N2 P1 C10 112.00(12) . . ? 
N1 P1 C10 106.76(12) . . ? 
C1 P1 C10 108.62(12) . . ? 
O1 S1 C1 119.56(12) . . ? 
O1 S1 C22 107.92(12) . . ? 
C1 S1 C22 107.25(12) . . ? 
O1 S1 C16 105.81(12) . . ? 
C1 S1 C16 112.48(13) . . ? 
C22 S1 C16 102.43(12) . . ? 
C4 N1 C2 119.8(2) . . ? 
C4 N1 P1 125.53(17) . . ? 
C2 N1 P1 112.19(18) . . ? 
C7 N2 C3 120.6(2) . . ? 
C7 N2 P1 126.46(17) . . ? 
C3 N2 P1 111.01(18) . . ? 
S1 C1 P1 113.73(14) . . ? 
S1 C1 Ge1 115.65(13) . . ? 
P1 C1 Ge1 128.12(13) . . ? 
N1 C2 C3 105.4(2) . . ? 
N1 C2 H2A 110.7 . . ? 
C3 C2 H2A 110.7 . . ? 
N1 C2 H2B 110.7 . . ? 
C3 C2 H2B 110.7 . . ? 
H2A C2 H2B 108.8 . . ? 
N2 C3 C2 105.0(2) . . ? 
N2 C3 H3A 110.7 . . ? 
C2 C3 H3A 110.7 . . ? 
N2 C3 H3B 110.7 . . ? 
C2 C3 H3B 110.7 . . ? 
H3A C3 H3B 108.8 . . ? 
N1 C4 C6 110.4(2) . . ? 
N1 C4 C5 112.1(2) . . ? 
C6 C4 C5 111.4(2) . . ? 
N1 C4 H4 107.5 . . ? 
C6 C4 H4 107.5 . . ? 
C5 C4 H4 107.5 . . ? 
C4 C5 H5A 109.5 . . ? 
C4 C5 H5B 109.5 . . ? 
H5A C5 H5B 109.5 . . ? 
C4 C5 H5C 109.5 . . ? 
H5A C5 H5C 109.5 . . ? 
H5B C5 H5C 109.5 . . ? 
C4 C6 H6A 109.5 . . ? 
C4 C6 H6B 109.5 . . ? 
H6A C6 H6B 109.5 . . ? 
C4 C6 H6C 109.5 . . ? 
H6A C6 H6C 109.5 . . ? 
H6B C6 H6C 109.5 . . ? 
N2 C7 C8 110.8(3) . . ? 
N2 C7 C9 111.9(2) . . ? 
C8 C7 C9 111.9(2) . . ? 
N2 C7 H7 107.3 . . ? 
C8 C7 H7 107.3 . . ? 
C9 C7 H7 107.3 . . ? 
C7 C8 H8A 109.5 . . ? 
C7 C8 H8B 109.5 . . ? 
H8A C8 H8B 109.5 . . ? 
C7 C8 H8C 109.5 . . ? 
H8A C8 H8C 109.5 . . ? 
H8B C8 H8C 109.5 . . ? 
C7 C9 H9A 109.5 . . ? 
C7 C9 H9B 109.5 . . ? 
H9A C9 H9B 109.5 . . ? 
C7 C9 H9C 109.5 . . ? 
H9A C9 H9C 109.5 . . ? 
H9B C9 H9C 109.5 . . ? 
C15 C10 C11 119.0(2) . . ? 
C15 C10 P1 120.4(2) . . ? 
C11 C10 P1 120.2(2) . . ? 
C12 C11 C10 120.3(3) . . ? 
C12 C11 H11 119.8 . . ? 
C10 C11 H11 119.8 . . ? 
C11 C12 C13 120.1(3) . . ? 
C11 C12 H12 120.0 . . ? 
C13 C12 H12 120.0 . . ? 
C14 C13 C12 120.0(3) . . ? 
C14 C13 H13 120.0 . . ? 
C12 C13 H13 120.0 . . ? 
C13 C14 C15 120.0(3) . . ? 
C13 C14 H14 120.0 . . ? 
C15 C14 H14 120.0 . . ? 
C14 C15 C10 120.6(3) . . ? 
C14 C15 H15 119.7 . . ? 
C10 C15 H15 119.7 . . ? 
C17 C16 C21 121.8(3) . . ? 
C17 C16 S1 121.1(2) . . ? 
C21 C16 S1 117.2(2) . . ? 
C16 C17 C18 118.2(3) . . ? 
C16 C17 H17 120.9 . . ? 
C18 C17 H17 120.9 . . ? 
C19 C18 C17 120.2(3) . . ? 
C19 C18 H18 119.9 . . ? 
C17 C18 H18 119.9 . . ? 
C20 C19 C18 121.3(3) . . ? 
C20 C19 H19 119.4 . . ? 
C18 C19 H19 119.4 . . ? 
C19 C20 C21 119.5(3) . . ? 
C19 C20 H20 120.3 . . ? 
C21 C20 H20 120.3 . . ? 
C16 C21 C20 119.1(3) . . ? 
C16 C21 H21 120.5 . . ? 
C20 C21 H21 120.5 . . ? 
C23 C22 C27 121.2(3) . . ? 
C23 C22 S1 122.8(2) . . ? 
C27 C22 S1 116.0(2) . . ? 
C22 C23 C24 118.8(3) . . ? 
C22 C23 H23 120.6 . . ? 
C24 C23 H23 120.6 . . ? 
C25 C24 C23 119.9(3) . . ? 
C25 C24 H24 120.1 . . ? 
C23 C24 H24 120.1 . . ? 
C26 C25 C24 120.9(3) . . ? 
C26 C25 H25 119.5 . . ? 
C24 C25 H25 119.5 . . ? 
C25 C26 C27 120.1(3) . . ? 
C25 C26 H26 120.0 . . ? 
C27 C26 H26 120.0 . . ? 
C26 C27 C22 119.1(3) . . ? 
C26 C27 H27 120.4 . . ? 
C22 C27 H27 120.4 . . ? 
  
_refine_diff_density_max    0.337 
_refine_diff_density_min   -0.267 
_refine_diff_density_rms    0.055 
  
_shelx_res_file 
; 
TITL UA017_a.res in P2(1)2(1)2(1) 
    UA017_a.res 
    created by SHELXL-2018/3 at 18:24:26 on 13-May-2019 
CELL 0.71073 10.39340 15.31600 18.05630 90.0000 90.0000 90.0000 
ZERR 4.00 0.00060 0.00090 0.00110 0.0000 0.0000 0.0000 
LATT -1 
SYMM 1/2-X, -Y, 1/2+Z 
SYMM -X, 1/2+Y, 1/2-Z 
SYMM 1/2+X, 1/2-Y, -Z 
SFAC C  H  Cl Ge N  O  P  S 
UNIT 108  132  8  4  8  4  4  4 
L.S. 10 
ACTA 
BOND $H 
FMAP 2 
PLAN 20 
SIZE 0.16 0.20 0.46 
TEMP -80.170 
WGHT    0.023300    1.076900 
FVAR       0.13904 
GE1   4    0.395663    0.468567    0.342298    11.00000    0.01861    0.03141 = 
         0.02091   -0.00499    0.00295   -0.00909 
CL1   3    0.256685    0.577184    0.300177    11.00000    0.01920    0.05159 = 
         0.05299   -0.01952   -0.00494    0.01013 
CL2   3    0.435957    0.410568    0.227169    11.00000    0.02938    0.02965 = 
         0.02914   -0.01358    0.00270   -0.00687 
P1    7    0.678120    0.558933    0.283069    11.00000    0.01223    0.01594 = 
         0.01730   -0.00137    0.00201    0.00136 
S1    8    0.612434    0.563134    0.434964    11.00000    0.01422    0.01851 = 
         0.01569   -0.00106   -0.00067    0.00169 
O1    6    0.744184    0.542037    0.455898    11.00000    0.01744    0.03226 = 
         0.02714   -0.00136   -0.00435    0.00516 
N1    5    0.790371    0.633006    0.297861    11.00000    0.01024    0.01981 = 
         0.03526    0.00077   -0.00164   -0.00070 
N2    5    0.779374    0.477239    0.271702    11.00000    0.01540    0.01916 = 
         0.02797    0.00197    0.00733    0.00468 
C1    1    0.562441    0.542012    0.350073    11.00000    0.01424    0.02149 = 
         0.01397   -0.00273    0.00047    0.00116 
C2    1    0.920459    0.594349    0.300815    11.00000    0.01217    0.03181 = 
         0.05230    0.00538   -0.00138    0.00243 
AFIX  23 
H2A   2    0.946297    0.583001    0.352702    11.00000   -1.20000 
H2B   2    0.984308    0.633956    0.277864    11.00000   -1.20000 
AFIX   0 
C3    1    0.911042    0.509568    0.257697    11.00000    0.01561    0.03112 = 
         0.05597    0.00408    0.01241    0.00476 
AFIX  23 
H3A   2    0.924735    0.519958    0.204158    11.00000   -1.20000 
H3B   2    0.975828    0.467009    0.275369    11.00000   -1.20000 
AFIX   0 
C4    1    0.775387    0.727854    0.286840    11.00000    0.01721    0.01958 = 
         0.03057   -0.00029    0.00321   -0.00171 
AFIX  13 
H4    2    0.681360    0.741393    0.289294    11.00000   -1.20000 
AFIX   0 
C5    1    0.823844    0.757227    0.211201    11.00000    0.03403    0.03302 = 
         0.03797    0.00726    0.00685   -0.00410 
AFIX 137 
H5A   2    0.915724    0.743833    0.206778    11.00000   -1.50000 
H5B   2    0.810775    0.820281    0.205862    11.00000   -1.50000 
H5C   2    0.776199    0.726460    0.172309    11.00000   -1.50000 
AFIX   0 
C6    1    0.841053    0.777850    0.348997    11.00000    0.03157    0.03378 = 
         0.04192   -0.00693    0.00143   -0.01147 
AFIX 137 
H6A   2    0.806763    0.758373    0.396780    11.00000   -1.50000 
H6B   2    0.824807    0.840474    0.342951    11.00000   -1.50000 
H6C   2    0.933914    0.766926    0.347324    11.00000   -1.50000 
AFIX   0 
C7    1    0.757203    0.385558    0.292048    11.00000    0.02062    0.01892 = 
         0.02958   -0.00128    0.00182    0.00322 
AFIX  13 
H7    2    0.664373    0.379756    0.305754    11.00000   -1.20000 
AFIX   0 
C8    1    0.781185    0.325793    0.226394    11.00000    0.05079    0.03237 = 
         0.04470   -0.01612   -0.00573    0.01145 
AFIX 137 
H8A   2    0.721567    0.340647    0.186277    11.00000   -1.50000 
H8B   2    0.767546    0.264998    0.241389    11.00000   -1.50000 
H8C   2    0.869922    0.333157    0.209139    11.00000   -1.50000 
AFIX   0 
C9    1    0.836050    0.358791    0.359338    11.00000    0.03684    0.03200 = 
         0.03503    0.00394   -0.00206    0.01112 
AFIX 137 
H9A   2    0.927776    0.360369    0.346837    11.00000   -1.50000 
H9B   2    0.812116    0.299473    0.374312    11.00000   -1.50000 
H9C   2    0.819035    0.399295    0.400196    11.00000   -1.50000 
AFIX   0 
C10   1    0.599132    0.588389    0.197793    11.00000    0.01616    0.02040 = 
         0.01797    0.00090   -0.00012   -0.00261 
C11   1    0.638232    0.551078    0.131194    11.00000    0.03121    0.02440 = 
         0.02374    0.00015    0.00680    0.00535 
AFIX  43 
H11   2    0.700789    0.505854    0.131280    11.00000   -1.20000 
AFIX   0 
C12   1    0.586513    0.579495    0.065018    11.00000    0.04532    0.04516 = 
         0.01886   -0.00232    0.00716    0.00629 
AFIX  43 
H12   2    0.610995    0.552264    0.019896    11.00000   -1.20000 
AFIX   0 
C13   1    0.499006    0.647638    0.064360    11.00000    0.04299    0.05469 = 
         0.02283    0.00853   -0.00366    0.01072 
AFIX  43 
H13   2    0.464460    0.667715    0.018723    11.00000   -1.20000 
AFIX   0 
C14   1    0.461991    0.686357    0.129866    11.00000    0.03443    0.04481 = 
         0.03048    0.00030   -0.00221    0.01501 
AFIX  43 
H14   2    0.403477    0.734003    0.129306    11.00000   -1.20000 
AFIX   0 
C15   1    0.509995    0.655866    0.196348    11.00000    0.02048    0.03184 = 
         0.02331   -0.00374    0.00118    0.00532 
AFIX  43 
H15   2    0.481751    0.681306    0.241494    11.00000   -1.20000 
AFIX   0 
C16   1    0.589363    0.674686    0.460190    11.00000    0.01766    0.01953 = 
         0.01738   -0.00252    0.00259   -0.00220 
C17   1    0.509950    0.728612    0.419303    11.00000    0.02279    0.02417 = 
         0.01971   -0.00221    0.00263   -0.00049 
AFIX  43 
H17   2    0.464626    0.707063    0.377430    11.00000   -1.20000 
AFIX   0 
C18   1    0.498176    0.815474    0.441182    11.00000    0.03545    0.02246 = 
         0.02964    0.00427    0.01180    0.00451 
AFIX  43 
H18   2    0.445238    0.854200    0.413603    11.00000   -1.20000 
AFIX   0 
C19   1    0.562870    0.845296    0.502503    11.00000    0.04657    0.02201 = 
         0.03658   -0.00834    0.01416   -0.00839 
AFIX  43 
H19   2    0.554103    0.904700    0.516775    11.00000   -1.20000 
AFIX   0 
C20   1    0.639862    0.791004    0.543525    11.00000    0.03919    0.03527 = 
         0.02853   -0.01267    0.00109   -0.01049 
AFIX  43 
H20   2    0.683191    0.812493    0.586115    11.00000   -1.20000 
AFIX   0 
C21   1    0.654006    0.704428    0.522352    11.00000    0.02869    0.03196 = 
         0.02088   -0.00376   -0.00239   -0.00583 
AFIX  43 
H21   2    0.707284    0.666093    0.550107    11.00000   -1.20000 
AFIX   0 
C22   1    0.507324    0.507523    0.496907    11.00000    0.02444    0.02205 = 
         0.01354   -0.00123    0.00042   -0.00306 
C23   1    0.393978    0.543935    0.522790    11.00000    0.03537    0.02433 = 
         0.03634   -0.00244    0.01317   -0.00128 
AFIX  43 
H23   2    0.367885    0.600416    0.507066    11.00000   -1.20000 
AFIX   0 
C24   1    0.319007    0.496381    0.572206    11.00000    0.04068    0.04294 = 
         0.04484   -0.01005    0.02244   -0.01080 
AFIX  43 
H24   2    0.241149    0.520403    0.590765    11.00000   -1.20000 
AFIX   0 
C25   1    0.357788    0.414444    0.594188    11.00000    0.05202    0.04289 = 
         0.03131    0.00630    0.00773   -0.02065 
AFIX  43 
H25   2    0.306421    0.382358    0.628147    11.00000   -1.20000 
AFIX   0 
C26   1    0.469810    0.378420    0.567678    11.00000    0.04931    0.03552 = 
         0.04848    0.01950   -0.00717   -0.00771 
AFIX  43 
H26   2    0.494989    0.321602    0.583019    11.00000   -1.20000 
AFIX   0 
C27   1    0.545815    0.424751    0.518752    11.00000    0.03220    0.02960 = 
         0.03781    0.00949   -0.00098    0.00175 
AFIX  43 
H27   2    0.623425    0.400235    0.500314    11.00000   -1.20000 
AFIX   0 
HKLF 4 
  
  
  
  
REM  UA017_a.res in P2(1)2(1)2(1) 
REM wR2 = 0.056135, GooF = S = 1.06955, Restrained GooF = 1.06955 for all data 
REM R1 = 0.029080 for 6501 Fo > 4sig(Fo) and 0.036533 for all 7146 data 
REM 320 parameters refined using 0 restraints 
  
END 
  
WGHT      0.0233      1.0769 
  
REM Highest difference peak  0.337,  deepest hole -0.267,  1-sigma level  0.055 
Q1    1   0.5889  0.5637  0.3880  11.00000  0.05    0.34 
Q2    1   0.4559  0.5137  0.3441  11.00000  0.05    0.31 
Q3    1   0.2527  0.5487  0.3363  11.00000  0.05    0.31 
Q4    1   0.6419  0.5810  0.2374  11.00000  0.05    0.30 
Q5    1   0.7359  0.5158  0.2752  11.00000  0.05    0.30 
Q6    1   0.7268  0.6052  0.2953  11.00000  0.05    0.30 
Q7    1   0.5384  0.7767  0.4221  11.00000  0.05    0.29 
Q8    1   0.5429  0.5305  0.4521  11.00000  0.05    0.29 
Q9    1   0.3755  0.5229  0.3244  11.00000  0.05    0.28 
Q10   1   0.6293  0.6980  0.4874  11.00000  0.05    0.25 
Q11   1   0.8032  0.7615  0.3170  11.00000  0.05    0.25 
Q12   1   0.4103  0.4934  0.3839  11.00000  0.05    0.24 
Q13   1   0.6037  0.5574  0.3171  11.00000  0.05    0.24 
Q14   1   0.9199  0.5617  0.2725  11.00000  0.05    0.23 
Q15   1   0.6030  0.6286  0.4594  11.00000  0.05    0.22 
Q16   1   0.4588  0.6511  0.1639  11.00000  0.05    0.22 
Q17   1   0.3264  0.4439  0.3516  11.00000  0.05    0.21 
Q18   1   0.7966  0.3712  0.3201  11.00000  0.05    0.21 
Q19   1   0.5897  0.5607  0.1683  11.00000  0.05    0.21 
Q20   1   0.3794  0.5217  0.5631  11.00000  0.05    0.20 
; 
_shelx_res_checksum   67283 
  
_shelx_hkl_file 
; 
  -2   0   0   11.72    0.65 
   2   0   0   11.17    0.59 
   2   0   0   11.61    0.60 
   2   0   0   11.25    0.57 
   2   0   0   12.00    0.61 
   2   0   0   10.68    0.68 
  -2   0   0   11.60    0.73 
  -2   0   0   12.32    0.64 
  -2   0   0   11.91    0.65 
  -2   0   0   10.75    0.61 
   3   0   0   -0.22    0.32 
  -3   0   0    0.30    0.37 
  -3   0   0   -0.15    0.33 
   3   0   0   -0.23    0.34 
   3   0   0   -0.50    0.36 
  -3   0   0   -0.46    0.33 
  -3   0   0   -0.26    0.40 
  -3   0   0   -0.06    0.35 
  -3   0   0    0.20    0.38 
   3   0   0    0.20    0.37 
   3   0   0    0.09    0.32 
  -4   0   0   31.43    1.33 
   4   0   0   30.28    1.41 
  -4   0   0   30.83    1.36 
   4   0   0   30.60    1.28 
  -4   0   0   31.71    1.27 
  -4   0   0   28.70    1.28 
  -4   0   0   31.47    1.45 
   4   0   0   32.72    1.36 
   4   0   0   31.76    1.23 
   4   0   0   28.53    1.28 
  -4   0   0   30.83    1.34 
   5   0   0   -0.58    0.60 
  -5   0   0   -0.05    0.57 
  -5   0   0   -0.02    0.67 
   5   0   0    0.13    0.57 
   5   0   0    0.43    0.63 
   5   0   0    0.20    0.53 
  -5   0   0    0.39    0.60 
  -5   0   0   -0.19    0.59 
   5   0   0   -0.20    0.53 
  -5   0   0   -0.55    0.62 
  -5   0   0   -0.45    0.55 
  -6   0   0  197.51    5.56 
   6   0   0  205.49    5.61 
  -6   0   0  207.42    5.63 
   6   0   0  204.29    5.60 
  -6   0   0  203.17    5.55 
  -6   0   0  201.18    5.73 
  -6   0   0  198.97    5.64 
   6   0   0  202.33    5.57 
   6   0   0  205.40    5.41 
  -6   0   0  207.53    5.63 
   6   0   0  201.89    5.73 
  -7   0   0   -0.69    0.71 
  -7   0   0   -0.16    0.72 
   7   0   0   -0.91    0.79 
  -7   0   0    0.62    0.81 
  -7   0   0   -0.08    0.71 
   7   0   0   -0.66    0.76 
  -7   0   0   -1.23    0.81 
  -7   0   0   -0.54    0.69 
   7   0   0   -1.24    1.09 
   7   0   0   -0.25    0.69 
   7   0   0   -0.18    0.62 
   8   0   0   42.66    2.43 
  -8   0   0   47.83    2.36 
  -8   0   0   43.92    2.26 
  -8   0   0   50.50    2.58 
  -8   0   0   41.64    2.42 
   8   0   0   46.59    2.26 
   8   0   0   47.81    2.08 
   8   0   0   46.11    2.27 
  -8   0   0   44.92    2.17 
  -8   0   0   48.20    2.37 
   8   0   0   42.94    2.29 
  -9   0   0    0.53    1.15 
  -9   0   0    0.01    0.99 
   9   0   0   -0.76    0.85 
   9   0   0   -1.23    1.05 
   9   0   0   -1.93    1.01 
  -9   0   0   -0.60    1.09 
  -9   0   0    0.64    1.06 
  -9   0   0    0.11    1.00 
   9   0   0   -0.85    0.95 
   9   0   0   -0.92    1.03 
  -9   0   0   -0.05    1.05 
  10   0   0   31.57    2.41 
 -10   0   0   34.95    2.59 
 -10   0   0   33.19    2.45 
 -10   0   0   34.07    3.39 
 -10   0   0   35.91    2.53 
 -10   0   0   34.93    2.42 
  10   0   0   34.64    2.13 
  10   0   0   34.27    2.47 
 -10   0   0   35.75    2.79 
  10   0   0   32.52    2.74 
  10   0   0   35.79    2.57 
  11   0   0    1.98    1.15 
  11   0   0   -1.58    1.46 
 -11   0   0   -0.62    1.30 
  11   0   0   -0.88    1.55 
 -11   0   0    2.62    1.59 
  11   0   0   -1.49    1.27 
  11   0   0    0.38    1.59 
 -11   0   0   -0.29    1.48 
 -11   0   0   -0.60    1.38 
 -11   0   0    0.66    1.37 
 -11   0   0   -0.64    1.37 
 -12   0   0   34.35    3.08 
  12   0   0   37.89    3.26 
  12   0   0   30.55    3.62 
 -12   0   0   28.78    2.97 
 -12   0   0   39.14    3.68 
 -12   0   0   27.92    3.33 
 -12   0   0   34.23    3.08 
  12   0   0   37.79    2.55 
  12   0   0   32.00    2.86 
 -12   0   0   36.45    3.10 
 -13   0   0   -1.12    2.30 
 -13   0   0    1.46    1.96 
 -13   0   0    3.50    1.88 
 -13   0   0    5.47    2.15 
  13   0   0   -1.36    2.40 
  -2   1   0  311.40    7.50 
  -2   1   0  302.96    7.50 
  -2  -1   0  305.40    7.38 
   2   1   0  312.23    7.40 
  -2  -1   0  303.93    7.39 
   2   1   0  269.87    7.44 
  -2   1   0  306.70    7.51 
   2  -1   0  303.03    7.50 
  -2  -1   0  300.95    7.38 
  -2  -1   0  306.61    7.45 
   2   1   0  306.42    7.47 
  -2   1   0  309.07    7.49 
   2  -1   0  308.70    7.56 
   2   1   0  306.81    7.39 
  -2  -1   0  299.66    7.39 
   2  -1   0  308.02    7.47 
  -2   1   0  309.64    7.56 
  -2   1   0  310.58    7.47 
  -2  -1   0  300.33    7.38 
   2   1   0  306.03    7.38 
   2   1   0  299.35    7.39 
   2  -1   0  304.31    7.50 
   2  -1   0  269.54    7.84 
   2  -1   0  311.77    7.50 
  -3   1   0   67.58    2.13 
  -3  -1   0   64.40    1.89 
   3   1   0   64.25    1.89 
   3   1   0   65.93    1.91 
   3  -1   0   66.48    2.11 
  -3   1   0   67.64    2.02 
  -3  -1   0   64.56    1.89 
  -3   1   0   66.81    2.01 
   3  -1   0   65.63    2.01 
  -3   1   0   63.98    1.99 
  -3   1   0   67.07    2.05 
  -3  -1   0   62.14    1.88 
   3  -1   0   67.61    2.03 
   3   1   0   66.16    1.90 
  -3   1   0   66.23    2.04 
  -3  -1   0   65.68    1.95 
   3  -1   0   68.72    2.02 
   3   1   0   56.21    2.05 
   3   1   0   64.76    1.94 
   3  -1   0   65.68    2.02 
   3   1   0   67.26    1.97 
   3  -1   0   66.85    2.01 
  -3  -1   0   62.87    1.90 
  -4   1   0   37.07    1.53 
  -4  -1   0   37.69    1.42 
   4   1   0   35.05    1.43 
  -4   1   0   38.57    1.55 
   4  -1   0   37.99    1.65 
   4   1   0   37.43    1.40 
  -4   1   0   37.32    1.66 
  -4  -1   0   39.05    1.43 
  -4  -1   0   36.83    1.40 
   4  -1   0   35.69    1.50 
   4   1   0   35.42    1.45 
   4   1   0   38.32    1.47 
   4   1   0   36.07    1.38 
   4  -1   0   38.73    1.54 
  -4  -1   0   39.20    1.52 
   4  -1   0   36.55    1.50 
  -4   1   0   37.65    1.48 
  -4   1   0   38.10    1.56 
  -4   1   0   38.52    1.52 
   4  -1   0   35.71    1.49 
  -4  -1   0   36.18    1.38 
  -5   1   0    3.94    0.71 
   5  -1   0    4.98    0.83 
   5  -1   0    4.99    0.61 
   5   1   0    5.32    0.74 
  -5  -1   0    4.92    0.69 
  -5  -1   0    4.90    0.68 
   5   1   0    3.59    0.67 
   5  -1   0    2.88    0.67 
   5   1   0    4.67    0.73 
   5  -1   0    4.92    0.86 
  -5   1   0    3.35    0.74 
  -5   1   0    3.58    0.69 
  -5   1   0    4.92    0.93 
  -5   1   0    4.14    0.75 
   5  -1   0    4.61    0.79 
  -5   1   0    5.24    0.85 
   5  -1   0    4.79    0.77 
   5   1   0    5.14    0.72 
  -5  -1   0    4.39    0.66 
  -5  -1   0    6.19    0.83 
   5   1   0    4.06    0.64 
  -5  -1   0    5.50    0.74 
   6  -1   0   25.91    1.25 
   6   1   0   24.44    1.42 
  -6   1   0   24.07    1.57 
  -6  -1   0   24.15    1.40 
  -6   1   0   24.81    1.52 
   6   1   0   25.55    1.41 
  -6  -1   0   25.45    1.47 
   6   1   0   24.72    1.43 
   6   1   0   26.21    1.41 
  -6  -1   0   25.64    1.48 
   6  -1   0   26.48    1.52 
   6   1   0   23.99    1.42 
  -6  -1   0   26.82    1.61 
  -6  -1   0   25.68    1.53 
  -6   1   0   26.70    1.78 
  -6   1   0   25.74    1.54 
   6  -1   0   23.33    1.48 
   6   1   0   23.84    1.52 
  -6  -1   0   24.41    1.43 
   6  -1   0   21.89    1.49 
   6  -1   0   25.51    1.73 
   6  -1   0   27.19    1.58 
  -6   1   0   22.86    1.47 
  -6   1   0   24.03    1.55 
   7  -1   0   57.28    2.41 
   7   1   0   59.15    2.25 
   7  -1   0   56.27    2.38 
   7  -1   0   60.03    2.63 
  -7  -1   0   56.13    2.27 
   7  -1   0   63.09    2.46 
   7   1   0   60.75    2.30 
   7   1   0   56.39    2.44 
  -7   1   0   61.09    2.51 
   7  -1   0   59.77    2.46 
  -7   1   0   62.21    2.73 
   7   1   0   58.56    2.32 
  -7  -1   0   56.23    2.42 
   7   1   0   54.31    2.64 
  -7   1   0   59.40    2.39 
  -7   1   0   57.08    2.43 
   7   1   0   63.73    2.37 
  -7  -1   0   60.94    2.38 
   7  -1   0   60.43    2.08 
  -7   1   0   58.77    2.45 
  -7  -1   0   58.71    2.49 
  -7  -1   0   57.78    2.35 
  -7   1   0   57.94    2.46 
  -7  -1   0   56.05    2.30 
   8  -1   0    0.26    0.86 
  -8   1   0    0.11    0.90 
   8  -1   0    0.11    0.89 
  -8   1   0   -0.47    0.90 
   8  -1   0    1.36    1.89 
  -8   1   0    1.31    0.93 
   8   1   0   -0.07    0.82 
   8   1   0   -0.12    0.82 
   8  -1   0    1.77    0.99 
   8   1   0   -0.26    0.72 
  -8  -1   0   -0.15    0.93 
  -8  -1   0   -0.54    0.79 
  -8  -1   0    0.06    0.81 
   8   1   0   -0.76    0.77 
  -8   1   0    1.06    1.04 
  -8   1   0    0.07    1.08 
  -8  -1   0    0.65    0.83 
   8   1   0   -0.16    0.89 
   8   1   0    0.31    0.93 
  -8  -1   0    0.43    0.91 
  -8  -1   0   -0.63    1.52 
  -8   1   0    1.32    0.88 
   8  -1   0    0.24    0.70 
   9  -1   0    2.77    0.86 
   9   1   0    2.24    1.03 
  -9   1   0    0.42    1.22 
   9   1   0    1.69    0.96 
  -9  -1   0    2.32    1.03 
  -9   1   0    2.64    1.14 
  -9   1   0    2.19    1.12 
   9  -1   0    2.25    1.09 
  -9  -1   0    0.81    1.03 
  -9   1   0    3.16    1.17 
  -9   1   0    1.41    1.13 
   9  -1   0    1.53    1.06 
   9   1   0    2.07    1.07 
   9   1   0    2.19    1.10 
   9  -1   0    1.09    1.11 
   9  -1   0   -0.07    1.17 
  -9   1   0    3.49    1.18 
  -9  -1   0    0.59    0.96 
  -9  -1   0    0.16    1.13 
  -9  -1   0    3.01    1.18 
   9   1   0    0.77    0.95 
  -9  -1   0    1.59    1.02 
   9  -1   0    0.74    1.23 
 -10   1   0   -0.76    1.23 
  10   1   0    1.99    1.33 
 -10  -1   0    0.27    1.12 
  10  -1   0    2.60    1.27 
  10   1   0    0.75    1.22 
  10   1   0    0.54    1.09 
 -10   1   0    2.52    1.38 
 -10   1   0    0.97    1.38 
  10  -1   0    2.05    0.95 
  10   1   0    0.66    1.11 
 -10  -1   0    3.28    1.37 
 -10   1   0    1.38    1.24 
 -10   1   0    2.57    1.22 
  10  -1   0    1.61    1.37 
 -10   1   0    1.87    1.31 
  10  -1   0   -0.99    1.29 
  10  -1   0    1.30    1.22 
 -10  -1   0    1.39    1.32 
  10  -1   0   -0.02    1.34 
  10   1   0    4.24    1.34 
 -10  -1   0    1.82    1.15 
 -10  -1   0    0.84    1.72 
  10   1   0    2.28    1.18 
 -10  -1   0    0.73    1.16 
  11   1   0    1.21    1.22 
 -11   1   0   -0.39    1.44 
  11   1   0   -0.72    1.45 
 -11   1   0    0.14    1.48 
  11  -1   0   -0.35    1.60 
 -11  -1   0   -1.42    1.32 
 -11  -1   0   -0.12    1.28 
  11  -1   0    0.04    1.03 
 -11   1   0   -0.70    1.42 
 -11   1   0    1.34    1.53 
 -11  -1   0   -1.82    1.29 
 -11   1   0   -0.80    1.37 
 -11   1   0   -0.47    1.58 
  11  -1   0    0.80    1.76 
  11   1   0   -0.24    1.17 
 -11  -1   0    2.98    1.44 
  11  -1   0    0.73    1.63 
 -11  -1   0    0.44    1.51 
 -11  -1   0    0.05    1.46 
  11   1   0   -0.84    1.40 
  11   1   0    0.37    1.48 
  12   1   0    3.84    1.49 
  12   1   0    5.10    1.57 
  12  -1   0    6.86    1.28 
  12  -1   0    3.06    2.12 
 -12  -1   0    5.68    1.70 
 -12  -1   0    6.84    1.79 
 -12   1   0    1.94    1.87 
 -12  -1   0    0.76    1.84 
 -12   1   0    5.05    1.74 
 -12   1   0    2.51    1.80 
  12   1   0    4.34    1.82 
 -12   1   0    7.22    1.88 
 -12   1   0    5.00    1.82 
 -12  -1   0    5.93    1.79 
  12   1   0    3.27    1.92 
 -12   1   0    5.05    1.85 
  12  -1   0    3.65    1.94 
 -12  -1   0    5.86    1.71 
  13  -1   0    1.17    2.43 
 -13   1   0   -0.03    2.15 
 -13   1   0    1.20    2.33 
 -13   1   0    8.60    2.24 
  13   1   0   -1.32    1.59 
  13   1   0    4.20    2.35 
 -13   1   0    0.52    1.92 
 -13  -1   0    3.65    1.93 
  13  -1   0    1.57    2.99 
 -13  -1   0   -0.45    2.04 
 -13  -1   0    2.84    1.78 
 -13  -1   0    1.54    3.01 
  -1   2   0    1.37    0.37 
  -1   2   0    1.11    0.32 
  -1   2   0    0.89    0.28 
   1   2   0    1.38    0.22 
  -1   2   0    1.29    0.27 
   1   2   0    0.81    0.23 
   1  -2   0    1.69    0.43 
   1  -2   0    1.26    0.34 
   1   2   0    1.29    0.26 
   1  -2   0    1.32    0.31 
   1  -2   0    1.81    0.25 
  -1   2   0    1.56    0.39 
  -1  -2   0    1.73    0.23 
  -1  -2   0    1.46    0.22 
  -1   2   0    1.18    0.31 
   1  -2   0    1.35    0.31 
  -1  -2   0    0.95    0.21 
  -1  -2   0    1.00    0.30 
   1   2   0    1.52    0.21 
   1   2   0    1.55    0.38 
   1  -2   0    1.31    0.33 
   1  -2   0    1.59    0.37 
   2  -2   0    0.90    0.42 
  -2  -2   0    1.35    0.26 
  -2  -2   0    1.52    0.29 
   2   2   0    0.92    0.26 
   2   2   0    1.53    0.26 
   2   2   0    1.28    0.45 
   2  -2   0    1.40    0.41 
   2  -2   0    0.37    0.37 
  -2   2   0    1.21    0.43 
  -2   2   0    0.79    0.39 
   2   2   0    1.39    0.22 
   2  -2   0    1.22    0.43 
   2   2   0    1.24    0.32 
  -2  -2   0    1.50    0.44 
   2  -2   0    1.12    0.39 
  -2   2   0    0.93    0.38 
   2  -2   0    0.81    0.42 
  -2  -2   0    1.11    0.26 
  -2  -2   0    1.41    0.24 
  -2   2   0    1.29    0.42 
  -2   2   0    0.93    0.49 
  -2   2   0    1.32    0.37 
   2   2   0    1.24    0.26 
  -2  -2   0    1.29    0.28 
  -3   2   0  133.22    3.60 
   3   2   0  127.62    3.36 
   3  -2   0  131.19    3.68 
   3  -2   0  130.32    3.52 
  -3   2   0  130.34    3.58 
   3  -2   0  133.32    3.59 
  -3   2   0  129.95    3.56 
   3  -2   0  132.09    3.58 
  -3  -2   0  132.27    3.36 
   3   2   0  130.56    3.36 
   3   2   0  131.69    3.35 
  -3  -2   0  128.61    3.37 
  -3  -2   0  127.62    3.35 
  -3  -2   0  125.79    3.51 
   3   2   0  129.39    3.54 
  -3   2   0  129.90    3.57 
  -3   2   0  128.56    3.68 
  -3  -2   0  129.94    3.37 
   3  -2   0  126.52    3.56 
   3  -2   0  113.13    3.73 
   3   2   0  128.92    3.36 
   3   2   0  129.49    3.35 
  -3   2   0  130.82    3.51 
  -3  -2   0  119.47    3.48 
   4   2   0  211.27    5.37 
   4  -2   0  214.20    5.64 
  -4   2   0  210.09    5.64 
   4  -2   0  214.70    5.76 
   4  -2   0  212.15    5.55 
   4   2   0  211.24    5.41 
  -4   2   0  214.95    5.56 
   4   2   0  209.18    5.41 
  -4   2   0  210.26    5.75 
  -4  -2   0  207.82    5.38 
   4   2   0  210.32    5.38 
  -4   2   0  208.47    5.60 
   4  -2   0  176.73    6.22 
   4  -2   0  210.19    5.62 
  -4  -2   0  213.03    5.40 
  -4   2   0  214.57    5.66 
  -4   2   0  212.75    5.61 
   4   2   0  211.44    5.39 
  -4  -2   0  208.80    5.41 
  -4  -2   0  207.14    5.38 
   4  -2   0  211.53    5.61 
  -4  -2   0  211.25    5.39 
   4   2   0  212.57    5.55 
   5  -2   0   38.66    1.91 
  -5  -2   0   37.98    1.53 
   5  -2   0   38.94    1.74 
  -5  -2   0   36.63    1.51 
  -5   2   0   37.53    1.81 
  -5   2   0   35.20    1.71 
  -5   2   0   36.27    2.00 
   5   2   0   35.61    1.47 
  -5   2   0   36.73    1.73 
   5   2   0   31.62    1.64 
   5   2   0   35.67    1.53 
  -5   2   0   37.79    1.79 
   5   2   0   34.58    1.67 
   5  -2   0   39.68    1.74 
  -5  -2   0   37.36    1.61 
  -5  -2   0   36.05    1.47 
   5  -2   0   35.32    1.76 
  -5   2   0   37.84    1.69 
  -5  -2   0   37.04    1.53 
   5   2   0   35.28    1.49 
   5   2   0   35.29    1.47 
   5  -2   0   35.81    1.74 
  -6  -2   0  348.63    9.14 
   6   2   0  361.01    9.15 
  -6   2   0  361.90    9.38 
   6  -2   0  355.05    8.90 
   6  -2   0  362.48    9.59 
  -6  -2   0  352.63    9.20 
  -6   2   0  346.81    9.53 
   6   2   0  358.67    9.12 
   6   2   0  356.44    9.21 
  -6   2   0  363.72    9.43 
   6  -2   0  360.05    9.40 
   6   2   0  357.37    9.25 
  -6  -2   0  355.48    9.12 
   6   2   0  365.94    9.15 
   6   2   0  374.00    9.20 
  -6   2   0  358.76    9.36 
  -6   2   0  362.43    9.34 
   6  -2   0  355.52    9.40 
  -6  -2   0  353.18    9.14 
   6  -2   0  358.43    9.37 
  -6  -2   0  354.47    9.15 
  -6   2   0  360.37    9.43 
   7  -2   0   31.68    1.90 
   7  -2   0   30.71    2.09 
  -7   2   0   32.21    2.19 
   7   2   0   32.71    1.66 
   7  -2   0   29.70    1.88 
  -7  -2   0   32.77    1.68 
   7  -2   0   28.41    1.86 
   7   2   0   28.83    1.58 
  -7  -2   0   27.20    1.65 
  -7   2   0   30.56    1.84 
   7   2   0   32.00    1.67 
  -7   2   0   30.51    1.94 
  -7   2   0   30.34    1.86 
  -7   2   0   28.45    1.79 
  -7  -2   0   27.86    1.57 
   7  -2   0   31.15    1.38 
   7   2   0   29.70    1.66 
   7   2   0   31.22    1.73 
  -7  -2   0   32.39    1.82 
   7   2   0   30.21    1.78 
  -7   2   0   31.43    1.99 
  -7  -2   0   31.86    1.70 
   8   2   0   17.91    1.49 
  -8  -2   0   21.10    1.65 
   8  -2   0   20.10    1.94 
   8   2   0   18.57    1.57 
  -8   2   0   20.68    2.14 
   8   2   0   23.76    1.67 
   8  -2   0   21.52    2.02 
  -8  -2   0   17.60    1.49 
  -8   2   0   21.85    1.92 
  -8   2   0   18.20    1.88 
  -8  -2   0   22.76    1.68 
  -8  -2   0   22.06    1.84 
   8  -2   0   18.41    2.18 
   8  -2   0   22.87    1.32 
  -8   2   0   19.72    1.80 
   8   2   0   22.62    1.79 
  -8   2   0   17.95    1.77 
   8   2   0   19.98    1.63 
  -8   2   0   20.43    1.97 
  -8  -2   0   14.99    1.78 
  -8  -2   0   22.85    1.67 
   8   2   0   18.15    1.69 
   8  -2   0   16.75    1.74 
  -9   2   0   10.02    1.48 
   9   2   0    9.87    1.21 
  -9   2   0    7.51    1.56 
   9   2   0    8.28    1.21 
  -9  -2   0    9.51    1.32 
   9   2   0   11.55    1.38 
  -9  -2   0   10.10    1.28 
  -9  -2   0    9.62    1.29 
  -9   2   0   11.32    1.63 
   9   2   0    9.31    1.33 
  -9   2   0    9.82    1.42 
  -9  -2   0    6.90    1.31 
   9  -2   0    8.99    1.62 
  -9  -2   0    9.32    1.26 
   9   2   0   10.38    1.34 
   9   2   0    9.55    1.34 
   9  -2   0    8.44    1.46 
   9  -2   0   11.05    1.27 
   9  -2   0   12.08    1.54 
  -9  -2   0   11.24    1.40 
  -9   2   0    9.33    1.40 
   9  -2   0    8.96    1.49 
   9  -2   0    7.38    1.63 
  -9   2   0    9.56    1.49 
  10   2   0   33.94    2.29 
 -10   2   0   36.44    2.68 
 -10  -2   0   33.30    2.28 
 -10  -2   0   32.32    2.30 
 -10   2   0   30.63    2.50 
  10  -2   0   31.82    2.59 
 -10   2   0   30.89    2.89 
 -10   2   0   30.75    2.47 
  10   2   0   31.67    2.16 
 -10  -2   0   33.26    2.50 
 -10  -2   0   30.31    2.33 
  10  -2   0   28.94    2.54 
  10   2   0   29.04    2.25 
  10   2   0   29.85    2.33 
  10  -2   0   30.41    2.92 
  10  -2   0   33.15    2.73 
 -10  -2   0   32.75    2.58 
  10   2   0   31.56    2.33 
 -10   2   0   34.64    2.56 
 -10   2   0   30.60    2.41 
  10   2   0   34.01    2.55 
 -10  -2   0   29.27    2.17 
  10  -2   0   31.56    2.78 
  10  -2   0   31.15    1.74 
  11  -2   0    2.08    1.75 
  11   2   0    1.50    1.45 
  11   2   0    4.08    1.43 
  11  -2   0    0.54    1.75 
  11  -2   0    1.25    0.96 
 -11  -2   0   -1.17    1.52 
 -11  -2   0    2.50    1.50 
 -11  -2   0    2.82    1.39 
 -11   2   0    4.07    1.99 
 -11   2   0    4.67    1.68 
  11   2   0    2.80    1.38 
  11  -2   0    2.44    1.67 
 -11  -2   0    2.42    1.33 
 -11  -2   0    5.39    1.38 
 -11   2   0    3.22    1.57 
 -11  -2   0    0.16    1.38 
  11   2   0    1.83    1.42 
  11   2   0    1.87    1.22 
 -11   2   0    3.21    1.61 
 -11   2   0    1.19    1.54 
 -11   2   0    1.88    1.61 
  11  -2   0    1.48    1.52 
  12  -2   0    2.61    2.28 
 -12   2   0    3.96    1.85 
  12   2   0    4.76    1.84 
 -12   2   0    5.70    2.36 
 -12   2   0    4.67    2.03 
  12   2   0    3.33    1.54 
 -12   2   0    2.86    1.89 
 -12   2   0   -0.79    1.68 
  12   2   0    2.69    1.43 
 -12  -2   0    2.84    1.98 
  12  -2   0   -0.54    1.69 
 -12   2   0    2.59    1.75 
  12  -2   0    2.32    1.05 
 -12  -2   0    4.26    1.66 
  12   2   0    4.00    1.77 
 -12  -2   0    0.67    1.54 
 -12  -2   0    1.11    1.46 
  12  -2   0   -0.04    1.95 
 -12  -2   0    1.39    1.55 
 -12  -2   0    1.36    2.78 
 -13   2   0    0.85    2.36 
 -13  -2   0    3.41    1.84 
 -13   2   0   -3.99    2.35 
 -13   2   0   -0.09    2.10 
  13   2   0   -3.65    1.74 
 -13  -2   0   -0.72    1.73 
 -13  -2   0   -2.05    3.10 
 -13   2   0   -1.90    1.86 
  13  -2   0    1.18    2.29 
   0   3   0    0.40    0.27 
   0  -3   0    0.12    0.30 
   0   3   0    0.31    0.28 
   0  -3   0    0.19    0.37 
   0   3   0    0.23    0.33 
   0  -3   0   -0.04    0.34 
   0  -3   0    0.11    0.31 
   0   3   0    0.02    0.28 
   0  -3   0    0.03    0.33 
   0  -3   0    0.08    0.34 
   0  -3   0    0.26    0.30 
   0   3   0    0.00    0.35 
   0   3   0   -0.28    0.30 
   1  -3   0   54.82    1.70 
   1  -3   0   52.21    1.68 
   1  -3   0   54.80    1.70 
  -1  -3   0   52.43    1.54 
   1   3   0   54.05    1.73 
  -1   3   0   54.68    1.69 
  -1   3   0   52.00    1.64 
  -1   3   0   54.44    1.67 
   1   3   0   54.95    1.54 
   1  -3   0   53.46    1.57 
  -1   3   0   46.31    1.84 
   1  -3   0   53.95    1.70 
   1   3   0   53.27    1.54 
  -1  -3   0   54.56    1.55 
  -1  -3   0   52.45    1.54 
  -1  -3   0   54.22    1.46 
  -1   3   0   54.35    1.73 
   1  -3   0   56.70    1.72 
   1  -3   0   54.98    1.75 
  -1  -3   0   54.40    1.55 
  -1   3   0   53.04    1.74 
  -1   3   0   52.25    1.65 
   1   3   0   54.04    1.54 
  -1  -3   0   55.25    1.74 
  -2   3   0  994.06   23.41 
  -2   3   0 1000.00   23.42 
  -2   3   0  995.77   23.44 
   2  -3   0  956.05   23.35 
   2   3   0  955.28   23.18 
   2   3   0  952.25   23.19 
  -2  -3   0  945.23   23.07 
  -2   3   0  970.87   23.36 
   2  -3   0  983.48   23.41 
   2  -3   0  997.29   23.50 
  -2  -3   0  986.21   23.42 
   2   3   0  947.14   23.17 
  -2  -3   0  936.23   23.18 
   2  -3   0  993.97   23.44 
  -2  -3   0  936.45   23.18 
   2   3   0  986.33   23.42 
   2  -3   0  980.81   23.43 
   2  -3   0  988.37   23.41 
   2  -3   0  957.76   23.16 
  -2   3   0  985.39   23.44 
   2   3   0  955.97   23.18 
  -2  -3   0  937.68   23.17 
  -2   3   0  959.78   23.47 
  -2  -3   0  940.87   23.17 
   3   3   0    1.42    0.35 
  -3  -3   0    2.07    0.37 
   3  -3   0    1.52    0.62 
  -3  -3   0    1.17    0.29 
  -3  -3   0    1.06    0.35 
   3  -3   0    1.28    0.58 
   3   3   0    1.43    0.33 
  -3  -3   0    1.20    0.34 
  -3  -3   0    1.13    0.53 
   3  -3   0    1.55    0.54 
   3  -3   0    0.94    0.59 
   3   3   0    0.95    0.58 
   3   3   0    1.63    0.36 
  -3  -3   0    1.40    0.34 
   3   3   0    1.54    0.28 
  -3   3   0    1.34    0.57 
  -3   3   0    2.02    0.63 
   3   3   0    0.98    0.32 
  -3   3   0    1.66    0.61 
  -3   3   0    1.85    0.57 
   3  -3   0    1.90    0.62 
   3  -3   0    1.20    0.50 
  -3   3   0    1.46    0.59 
  -3   3   0    2.36    0.50 
   4   3   0   26.00    1.10 
   4  -3   0   29.96    1.45 
  -4  -3   0   25.18    1.10 
   4  -3   0   25.46    1.45 
   4  -3   0   25.57    1.59 
  -4   3   0   26.62    1.52 
  -4   3   0   25.41    1.35 
  -4   3   0   24.98    1.45 
  -4  -3   0   24.82    1.39 
   4   3   0   25.27    1.07 
  -4  -3   0   28.84    1.12 
   4   3   0   26.01    1.10 
   4  -3   0   28.52    1.53 
  -4  -3   0   25.87    1.13 
  -4   3   0   28.75    1.54 
  -4  -3   0   27.72    1.15 
   4   3   0   26.51    1.10 
  -4  -3   0   26.50    1.15 
   4   3   0   25.80    1.45 
  -4   3   0   27.62    1.70 
   4  -3   0   27.08    1.44 
   4   3   0   25.24    1.12 
  -4   3   0   27.10    1.35 
   4  -3   0   25.66    1.44 
   5  -3   0   17.93    1.41 
   5   3   0   19.73    1.11 
  -5   3   0   19.43    1.42 
   5  -3   0   19.45    1.62 
   5   3   0   18.23    1.06 
  -5   3   0   16.37    1.38 
  -5  -3   0   17.21    1.07 
  -5  -3   0   19.66    1.15 
   5  -3   0   20.35    1.39 
   5  -3   0   19.20    1.49 
  -5   3   0   19.19    1.52 
  -5   3   0   20.07    1.53 
   5  -3   0   19.27    1.35 
   5   3   0   18.15    1.44 
  -5  -3   0   16.39    1.07 
   5  -3   0   18.78    1.40 
  -5   3   0   18.72    1.69 
   5   3   0   16.97    1.05 
  -5  -3   0   18.79    1.10 
  -5  -3   0   17.01    1.11 
   5   3   0   17.92    1.05 
  -5   3   0   15.82    1.29 
   5   3   0   18.22    1.07 
  -6  -3   0   12.18    1.12 
  -6   3   0   12.94    1.28 
   6  -3   0   10.97    1.35 
   6   3   0   12.02    1.04 
   6  -3   0   12.09    1.38 
  -6  -3   0   13.12    1.07 
  -6   3   0   15.65    1.53 
   6   3   0   10.12    1.02 
   6   3   0   11.88    1.09 
  -6   3   0   13.43    1.72 
   6   3   0   11.02    1.41 
   6  -3   0   13.32    1.50 
  -6  -3   0   12.52    1.18 
   6  -3   0   12.93    1.41 
   6   3   0   14.08    1.13 
  -6   3   0   12.22    1.36 
  -6  -3   0   12.92    1.15 
   6  -3   0   13.53    1.50 
  -6  -3   0   11.77    1.13 
  -6   3   0   13.75    1.42 
  -6   3   0   12.30    1.47 
   6  -3   0   11.83    1.59 
   6   3   0   10.28    1.28 
   7  -3   0   91.96    3.28 
  -7   3   0   88.84    3.55 
  -7  -3   0   88.50    2.93 
   7  -3   0   77.91    3.93 
  -7   3   0   86.05    3.20 
   7   3   0   85.68    2.91 
  -7   3   0   92.07    3.36 
  -7  -3   0   85.71    2.91 
   7  -3   0   84.16    3.24 
  -7  -3   0   85.35    2.93 
  -7   3   0   92.27    3.34 
  -7  -3   0   92.51    2.93 
   7   3   0   86.21    2.93 
   7  -3   0   90.17    3.29 
   7   3   0   93.39    2.93 
   7   3   0   87.54    2.88 
   7   3   0   85.05    2.82 
   7  -3   0   89.05    2.56 
  -7   3   0   82.61    3.20 
  -7   3   0   87.15    3.11 
  -7  -3   0   88.37    2.86 
   7   3   0   88.18    3.17 
   7  -3   0   87.15    3.26 
   8  -3   0   18.42    1.96 
   8  -3   0   19.21    1.16 
   8   3   0   18.03    1.57 
  -8  -3   0   17.17    1.52 
   8  -3   0   17.96    1.96 
  -8  -3   0   17.46    1.60 
  -8   3   0   16.93    2.24 
  -8  -3   0   17.81    1.67 
   8   3   0   17.69    1.85 
  -8   3   0   15.89    1.88 
   8   3   0   14.43    1.40 
   8  -3   0   16.16    1.85 
  -8   3   0   15.01    1.80 
  -8   3   0   17.13    2.01 
   8   3   0   15.81    1.56 
   8  -3   0   16.28    2.18 
   8   3   0   17.27    1.54 
  -8   3   0   16.38    1.82 
   8  -3   0   17.37    1.91 
  -8  -3   0   17.28    1.65 
  -8   3   0   15.63    1.93 
  -8  -3   0   16.45    1.42 
   8   3   0   15.72    1.48 
  -9   3   0    6.04    1.58 
   9   3   0   11.58    1.48 
   9  -3   0   10.53    1.80 
   9  -3   0    8.04    1.16 
   9   3   0    6.90    1.19 
   9   3   0    7.91    1.21 
   9   3   0    6.35    1.10 
   9  -3   0    7.57    1.51 
  -9  -3   0    8.73    1.23 
   9   3   0    6.72    1.32 
  -9   3   0    6.11    1.41 
  -9  -3   0    6.56    1.28 
  -9  -3   0    6.45    1.10 
  -9  -3   0    8.95    1.27 
  -9   3   0    7.12    1.33 
  -9   3   0    8.99    1.49 
  -9   3   0    8.26    1.50 
   9   3   0    9.26    1.24 
  -9  -3   0    9.47    1.22 
   9  -3   0    7.34    1.53 
   9  -3   0    8.88    1.53 
   9  -3   0   10.61    1.55 
  -9   3   0    5.96    1.35 
 -10   3   0    4.27    1.67 
 -10  -3   0    6.28    1.22 
 -10   3   0    7.88    1.62 
  10   3   0    6.89    1.27 
 -10  -3   0    6.05    1.23 
 -10  -3   0    8.05    1.33 
  10  -3   0    4.47    1.54 
  10  -3   0    4.45    1.55 
  10   3   0    7.34    1.41 
  10  -3   0    6.91    0.87 
  10  -3   0    6.94    1.55 
  10  -3   0    5.56    1.72 
 -10   3   0    7.35    1.73 
 -10  -3   0    4.90    1.34 
 -10   3   0    5.87    1.51 
  10   3   0    8.81    1.39 
  10   3   0    7.05    1.15 
 -10   3   0    6.83    1.62 
  10   3   0    6.21    1.32 
  10   3   0    6.96    1.38 
  10  -3   0    2.57    1.53 
 -10  -3   0    4.91    1.43 
 -10   3   0    3.08    1.36 
 -10  -3   0    5.75    1.37 
  11  -3   0   18.32    1.43 
 -11  -3   0   19.72    2.16 
 -11  -3   0   18.06    2.28 
  11   3   0   18.86    2.48 
  11   3   0   18.90    2.49 
 -11   3   0   18.73    2.68 
 -11   3   0   19.04    2.39 
  11  -3   0   20.94    2.76 
 -11   3   0   15.06    2.05 
 -11  -3   0   15.63    2.05 
 -11   3   0   17.29    2.09 
  11   3   0   15.21    2.07 
  11   3   0   15.72    2.23 
  11  -3   0   18.35    2.49 
 -11  -3   0   16.94    1.85 
 -11  -3   0   15.36    2.15 
 -11   3   0   20.01    2.32 
 -11  -3   0   20.63    2.43 
  11  -3   0   18.56    2.18 
  11   3   0   18.24    1.94 
 -12  -3   0   19.13    2.06 
 -12  -3   0   19.56    2.61 
 -12  -3   0   23.79    2.77 
 -12  -3   0   17.21    2.38 
  12   3   0   25.00    2.89 
 -12   3   0   18.21    2.58 
 -12   3   0   22.83    2.64 
  12   3   0   20.03    2.17 
 -12   3   0   25.65    3.29 
  12  -3   0   17.50    2.46 
  12  -3   0   20.60    1.41 
 -12   3   0   24.27    3.23 
 -12  -3   0   20.87    2.84 
  12  -3   0   19.98    2.93 
  12  -3   0   16.69    2.73 
  12   3   0   20.03    2.15 
 -12  -3   0   18.99    2.50 
  12   3   0   22.72    3.08 
 -12   3   0   18.66    2.61 
 -12   3   0   17.86    2.35 
 -13  -3   0    9.61    1.89 
 -13   3   0    5.49    2.61 
 -13  -3   0    7.64    2.14 
 -13   3   0    3.03    2.15 
 -13  -3   0    9.86    1.87 
 -13   3   0    1.71    2.51 
 -13   3   0    9.87    2.45 
  13  -3   0    3.83    2.45 
  13   3   0    8.38    2.23 
   0  -4   0   24.76    1.04 
   0  -4   0   26.26    1.05 
   0  -4   0   25.39    1.05 
   0   4   0   24.41    1.12 
   0  -4   0   23.70    1.16 
   0   4   0   25.64    1.02 
   0  -4   0   23.76    1.09 
   0   4   0   26.63    1.08 
   0   4   0   24.63    1.02 
   0   4   0   23.90    1.10 
   0  -4   0   24.63    1.05 
   0  -4   0   25.00    1.04 
   0   4   0   25.06    1.13 
   0   4   0   23.33    1.03 
   1   4   0   84.68    2.35 
  -1  -4   0   84.97    2.27 
  -1   4   0   85.04    2.40 
  -1   4   0   84.60    2.54 
  -1   4   0   81.22    3.07 
   1   4   0   83.63    2.36 
   1   4   0   85.19    2.52 
   1  -4   0   83.96    2.53 
   1  -4   0   81.70    2.47 
  -1  -4   0   84.42    2.56 
  -1  -4   0   85.83    2.36 
  -1  -4   0   83.89    2.54 
   1  -4   0   84.23    2.39 
  -1  -4   0   85.63    2.37 
   1   4   0   86.50    2.36 
  -1   4   0   84.72    2.52 
   1  -4   0   86.01    2.51 
  -1  -4   0   84.19    2.36 
  -1  -4   0   86.14    2.37 
   1  -4   0   86.19    2.50 
  -1   4   0   83.35    2.48 
   1  -4   0   85.84    2.52 
  -1   4   0   85.05    2.48 
   1  -4   0   84.39    2.52 
  -1   4   0   83.13    2.49 
  -2   4   0   36.56    1.47 
   2  -4   0   34.05    1.43 
  -2  -4   0   34.06    1.20 
   2   4   0   34.61    1.20 
  -2   4   0   35.45    1.57 
   2  -4   0   37.02    1.51 
  -2  -4   0   34.50    1.47 
   2  -4   0   35.94    1.54 
  -2   4   0   35.84    1.41 
   2   4   0   35.14    1.19 
   2   4   0   35.47    1.19 
  -2   4   0   37.28    1.48 
   2  -4   0   34.69    1.46 
  -2  -4   0   35.17    1.21 
   2  -4   0   36.30    1.44 
  -2   4   0   34.08    1.40 
  -2   4   0   36.77    1.52 
  -2  -4   0   35.84    1.21 
  -2  -4   0   34.30    1.18 
   2   4   0   35.95    1.53 
   2   4   0   35.74    1.20 
   2  -4   0   35.54    1.22 
   2  -4   0   36.62    1.46 
  -3  -4   0   86.51    2.26 
  -3  -4   0   83.32    2.75 
   3   4   0   86.83    2.43 
   3   4   0   85.65    2.78 
   3   4   0   88.54    2.44 
   3  -4   0   84.25    2.77 
  -3  -4   0   88.14    2.44 
   3   4   0   89.09    2.42 
  -3   4   0   86.63    2.73 
   3  -4   0   87.18    2.89 
   3  -4   0   91.13    2.83 
   3  -4   0   87.01    2.38 
   3  -4   0   89.44    2.71 
   3  -4   0   88.27    2.80 
   3  -4   0   87.86    2.75 
  -3  -4   0   85.26    2.41 
  -3  -4   0   88.67    2.45 
  -3   4   0   86.06    2.69 
   3   4   0   89.63    2.44 
  -3   4   0   90.23    2.84 
  -3   4   0   88.83    2.78 
  -3  -4   0   84.40    2.42 
  -3   4   0   89.03    2.84 
  -3   4   0   86.02    2.86 
   4  -4   0  105.97    3.30 
   4   4   0  109.46    2.97 
  -4   4   0  108.55    3.59 
   4  -4   0  107.75    3.35 
   4   4   0  108.45    2.98 
  -4  -4   0  104.99    3.32 
   4  -4   0  108.78    3.40 
  -4   4   0  107.36    3.41 
   4  -4   0  108.67    3.41 
  -4   4   0  114.40    3.47 
  -4  -4   0  105.88    2.95 
   4  -4   0  108.91    3.38 
   4   4   0  107.17    3.38 
  -4   4   0  103.66    3.31 
  -4   4   0  106.14    3.33 
   4  -4   0  107.91    3.55 
   4   4   0  109.62    2.98 
   4   4   0  103.43    2.97 
  -4  -4   0  100.70    3.00 
  -4  -4   0  109.09    2.99 
  -4   4   0  107.87    3.28 
  -4  -4   0  109.78    3.00 
   5   4   0   36.13    1.46 
  -5   4   0   34.74    1.72 
   5  -4   0   35.63    1.90 
  -5  -4   0   38.24    1.48 
  -5   4   0   34.11    1.95 
   5   4   0   34.61    1.40 
   5  -4   0   35.59    2.08 
   5   4   0   37.33    1.43 
  -5  -4   0   35.00    1.78 
  -5  -4   0   37.22    1.48 
   5  -4   0   37.93    1.95 
  -5   4   0   37.30    1.97 
   5  -4   0   35.05    1.79 
  -5   4   0   36.24    1.84 
  -5   4   0   35.69    2.16 
   5   4   0   36.78    1.88 
  -5  -4   0   38.64    1.40 
  -5   4   0   36.83    1.78 
   5  -4   0   34.98    1.86 
   5   4   0   32.80    1.34 
   5  -4   0   37.12    1.90 
  -5  -4   0   35.61    1.42 
   5   4   0   38.21    1.47 
   6   4   0    0.51    0.52 
   6  -4   0    1.54    0.97 
   6  -4   0   -0.10    1.31 
  -6   4   0    0.70    0.82 
  -6   4   0   -0.39    0.88 
  -6   4   0   -0.01    0.82 
   6  -4   0    0.48    0.79 
  -6  -4   0    0.78    0.58 
   6   4   0    0.78    0.53 
   6   4   0    0.35    0.85 
   6  -4   0    1.25    0.92 
   6  -4   0    0.33    0.79 
  -6  -4   0    1.16    0.57 
   6  -4   0    0.58    0.76 
   6   4   0    0.27    0.55 
  -6   4   0   -1.14    0.83 
   6   4   0    0.71    0.49 
  -6   4   0    0.09    0.91 
  -6   4   0   -0.65    0.68 
  -6  -4   0   -0.29    0.57 
  -6  -4   0    0.45    0.70 
   6   4   0    0.01    0.56 
  -6  -4   0   -0.24    0.53 
  -7  -4   0    3.83    0.74 
   7   4   0    3.90    0.72 
   7   4   0    5.38    1.15 
   7  -4   0    3.72    1.08 
  -7  -4   0    3.59    0.81 
   7   4   0    4.15    0.82 
   7  -4   0    2.99    0.99 
  -7   4   0    4.26    1.13 
   7   4   0    3.62    0.73 
   7   4   0    4.42    0.72 
  -7  -4   0    3.92    0.78 
  -7   4   0    5.86    1.02 
  -7   4   0    3.60    1.08 
  -7   4   0    3.08    0.96 
   7  -4   0    4.18    0.99 
   7  -4   0    3.62    1.11 
  -7  -4   0    5.14    0.82 
   7  -4   0    3.29    1.23 
   7  -4   0    4.04    1.21 
  -7   4   0    3.33    1.18 
  -7  -4   0    2.59    0.71 
  -7   4   0    3.04    1.17 
   7   4   0    3.08    1.00 
  -8  -4   0   19.98    1.43 
   8   4   0   19.99    1.52 
  -8  -4   0   17.79    1.54 
  -8   4   0   21.50    1.96 
  -8   4   0   16.94    2.27 
   8   4   0   19.68    1.45 
   8   4   0   24.10    1.68 
  -8   4   0   22.43    2.44 
   8  -4   0   18.64    1.98 
   8  -4   0   21.53    2.40 
  -8  -4   0   20.71    1.61 
   8   4   0   15.55    1.95 
   8  -4   0   18.21    2.00 
  -8  -4   0   18.83    1.55 
  -8   4   0   19.15    2.10 
   8   4   0   20.07    1.56 
   8  -4   0   20.64    2.11 
   8  -4   0   20.75    2.12 
   8   4   0   20.35    1.63 
   8  -4   0   20.33    1.12 
  -8   4   0   17.96    1.98 
  -8  -4   0   19.92    1.65 
  -8   4   0   19.43    2.10 
  -9   4   0    3.82    1.24 
   9  -4   0    1.93    1.30 
   9   4   0    3.24    0.97 
   9  -4   0    3.02    1.55 
   9   4   0    4.54    1.10 
  -9  -4   0    4.60    1.05 
  -9   4   0    3.85    1.51 
   9   4   0    4.09    0.92 
   9   4   0    2.59    1.29 
  -9   4   0    3.25    1.29 
   9  -4   0    4.47    1.39 
  -9  -4   0    5.30    1.05 
   9  -4   0    4.00    0.66 
   9   4   0    4.67    1.15 
  -9   4   0    3.89    1.43 
   9   4   0    3.65    0.99 
  -9  -4   0    3.88    0.98 
  -9  -4   0    3.37    1.19 
  -9   4   0    4.53    1.34 
  -9  -4   0    2.76    1.08 
   9  -4   0    3.12    1.50 
   9  -4   0    2.13    1.33 
 -10   4   0   35.13    2.92 
  10  -4   0   30.29    2.99 
  10  -4   0   33.55    1.40 
  10   4   0   35.10    2.32 
  10   4   0   37.30    2.68 
 -10   4   0   31.28    3.32 
 -10   4   0   25.33    2.55 
 -10  -4   0   33.78    2.35 
 -10  -4   0   29.86    2.05 
  10  -4   0   33.70    3.25 
 -10   4   0   37.11    2.80 
  10  -4   0   29.65    2.82 
 -10   4   0   33.81    3.83 
  10   4   0   29.65    2.16 
  10   4   0   29.94    2.25 
 -10  -4   0   30.48    2.66 
 -10  -4   0   33.83    2.17 
 -10  -4   0   31.31    2.22 
  10  -4   0   38.13    2.79 
  10   4   0   34.04    2.24 
 -10  -4   0   37.81    2.31 
 -10   4   0   27.43    2.74 
  10  -4   0   32.74    2.76 
  10   4   0   30.95    2.06 
 -11   4   0    1.87    1.83 
 -11  -4   0    3.90    1.31 
  11   4   0    3.07    1.56 
 -11   4   0    2.65    1.74 
 -11   4   0    1.60    1.84 
 -11  -4   0    4.23    1.32 
 -11   4   0    2.34    1.75 
 -11  -4   0    0.26    1.56 
  11  -4   0    2.34    1.76 
  11  -4   0    1.06    1.94 
  11   4   0    4.78    1.46 
 -11  -4   0    5.13    1.32 
 -11  -4   0    3.73    1.32 
 -11   4   0    3.86    1.78 
 -11   4   0    1.54    1.64 
  11   4   0    2.46    1.37 
  11  -4   0   -0.35    1.59 
 -11  -4   0    5.47    1.30 
  11   4   0    3.98    1.27 
 -12  -4   0   -0.01    2.04 
 -12   4   0    1.37    2.22 
  12   4   0   -1.83    1.59 
 -12  -4   0    0.23    1.47 
  12  -4   0   -3.77    1.88 
 -12  -4   0   -1.68    1.52 
  12   4   0   -0.36    1.62 
 -12   4   0   -1.59    2.60 
 -12  -4   0    4.14    1.55 
 -12   4   0   -0.10    1.99 
  12   4   0   -1.54    2.37 
 -12  -4   0    2.34    1.41 
 -12   4   0   -1.33    2.06 
 -12   4   0    4.11    1.97 
 -12   4   0   -0.76    1.89 
  12   4   0    0.49    1.78 
  12  -4   0    0.50    2.13 
 -13  -4   0    0.58    1.66 
 -13  -4   0    2.12    1.75 
 -13   4   0    4.67    2.41 
 -13   4   0   -2.06    2.19 
  13  -4   0   -0.82    2.46 
 -13   4   0    8.02    2.81 
 -13   4   0   -1.87    2.89 
  13   4   0    0.26    2.55 
   0  -5   0   -0.37    0.44 
   0  -5   0   -0.11    0.43 
   0  -5   0   -0.25    0.40 
   0   5   0    0.16    0.48 
   0  -5   0    0.09    0.39 
   0  -5   0    0.30    0.39 
   0   5   0   -0.21    0.42 
   0   5   0   -0.07    0.41 
   0  -5   0    0.33    0.48 
   0   5   0    0.04    0.41 
   0   5   0    0.23    0.48 
   0  -5   0   -0.10    0.44 
   0   5   0   -0.06    0.39 
   0   5   0    0.09    0.39 
   1   5   0    5.27    0.70 
  -1  -5   0    5.92    0.74 
   1  -5   0    8.32    0.91 
   1  -5   0    6.86    0.92 
   1  -5   0    5.76    0.67 
   1  -5   0    6.71    0.84 
  -1   5   0    6.27    0.82 
  -1  -5   0    6.13    0.61 
  -1   5   0    4.07    0.58 
   1   5   0    5.25    0.66 
  -1   5   0    6.51    0.81 
  -1  -5   0    6.16    0.71 
  -1  -5   0    5.10    0.67 
   1   5   0    7.26    0.97 
  -1  -5   0    5.93    0.72 
   1  -5   0    6.38    0.88 
  -1   5   0    4.36    0.59 
  -1  -5   0    6.62    0.74 
  -1   5   0    7.00    0.97 
  -1   5   0    5.80    0.71 
   1  -5   0    7.26    0.91 
  -1   5   0    5.62    0.74 
   1  -5   0    5.56    0.78 
  -1  -5   0    6.97    0.97 
  -2  -5   0  358.10    8.97 
  -2  -5   0  359.94    9.26 
  -2   5   0  376.29    9.30 
  -2  -5   0  358.94    8.81 
  -2   5   0  365.49    9.23 
   2   5   0  369.39    8.99 
   2   5   0  359.12    8.98 
   2   5   0  359.79    8.97 
   2  -5   0  359.04    9.00 
   2  -5   0  365.92    9.26 
  -2   5   0  368.49    9.21 
  -2   5   0  354.49    9.25 
   2  -5   0  373.35    9.28 
  -2   5   0  353.51    9.30 
   2  -5   0  367.08    9.25 
   2  -5   0  368.20    9.34 
  -2  -5   0  361.11    9.00 
   2   5   0  363.15    9.28 
   2   5   0  359.18    8.99 
  -2  -5   0  359.39    8.98 
  -2   5   0  357.56    9.20 
   2  -5   0  362.39    9.23 
   2  -5   0  361.52    9.24 
  -2  -5   0  358.99    8.98 
  -3  -5   0  118.81    3.23 
  -3  -5   0  119.14    3.23 
  -3  -5   0  117.78    3.21 
   3   5   0  113.68    3.22 
  -3   5   0  119.45    3.66 
   3  -5   0  118.01    3.20 
   3   5   0  120.03    3.23 
  -3   5   0  116.04    3.61 
  -3   5   0  116.87    3.74 
   3   5   0  117.71    3.64 
  -3  -5   0  117.71    3.22 
  -3  -5   0  115.27    3.60 
   3  -5   0  118.25    3.61 
  -3   5   0  116.62    3.55 
   3  -5   0  120.70    3.56 
   3  -5   0  119.48    3.64 
   3   5   0  120.97    3.21 
   3  -5   0  115.97    3.68 
   3  -5   0  118.37    3.63 
  -3   5   0  119.66    3.51 
   3  -5   0  120.76    3.65 
  -3   5   0  117.20    3.56 
   3   5   0  117.57    3.21 
  -3  -5   0  117.01    2.98 
  -4   5   0    4.58    0.93 
  -4  -5   0    5.40    0.74 
   4  -5   0    6.61    0.90 
   4   5   0    5.80    1.00 
   4   5   0    6.84    0.73 
   4  -5   0    4.54    0.83 
  -4   5   0    4.80    1.06 
   4  -5   0    6.52    1.06 
   4   5   0    5.24    0.60 
   4  -5   0    5.83    0.71 
  -4  -5   0    6.22    0.56 
   4  -5   0    5.05    0.94 
  -4   5   0    4.68    0.91 
  -4   5   0    6.21    0.85 
   4   5   0    6.99    0.77 
  -4  -5   0    6.18    0.80 
  -4  -5   0    5.29    0.89 
   4  -5   0    5.41    0.99 
   4  -5   0    5.60    0.93 
  -4  -5   0    6.70    0.82 
   4   5   0    6.20    0.75 
  -4   5   0    5.51    0.95 
  -4   5   0    5.06    0.86 
   5   5   0  127.06    3.59 
  -5  -5   0  125.21    3.56 
  -5   5   0  136.23    4.20 
  -5  -5   0  127.93    3.41 
   5   5   0  129.49    4.09 
  -5  -5   0  128.53    3.59 
   5  -5   0  129.65    3.98 
  -5  -5   0  131.03    3.60 
  -5  -5   0  133.50    3.63 
  -5   5   0  124.19    4.26 
   5  -5   0  131.25    4.13 
  -5   5   0  131.00    4.17 
   5   5   0  130.32    3.61 
   5   5   0  127.24    3.56 
   5   5   0  126.94    3.56 
  -5   5   0  130.38    4.10 
   5  -5   0  127.81    4.11 
  -5   5   0  129.63    3.94 
   5  -5   0  132.02    4.14 
   5  -5   0  127.47    4.30 
   5  -5   0  129.60    4.12 
  -5   5   0  129.62    4.09 
  -5  -5   0  130.17    4.05 
   6   5   0   52.74    1.95 
  -6   5   0   53.09    2.56 
   6  -5   0   45.79    2.42 
  -6   5   0   53.35    2.35 
   6   5   0   54.55    2.50 
   6   5   0   51.08    1.86 
  -6  -5   0   53.16    1.93 
   6  -5   0   51.28    2.37 
  -6   5   0   55.07    2.73 
  -6  -5   0   53.98    1.95 
   6  -5   0   52.48    2.38 
  -6   5   0   55.11    2.53 
  -6   5   0   50.84    2.44 
  -6  -5   0   52.70    1.96 
  -6  -5   0   54.03    1.78 
   6  -5   0   49.06    2.65 
  -6  -5   0   50.78    1.87 
  -6   5   0   50.82    2.26 
   6  -5   0   56.91    2.53 
   6   5   0   50.29    1.90 
   6  -5   0   49.63    2.39 
  -7   5   0   11.02    1.27 
   7  -5   0   12.47    1.47 
   7   5   0   10.05    1.12 
  -7  -5   0   11.97    1.15 
   7   5   0   10.23    1.08 
   7   5   0   11.89    1.44 
   7  -5   0    9.92    1.29 
  -7  -5   0   10.29    1.18 
   7   5   0    9.54    1.04 
  -7  -5   0   10.32    1.13 
  -7  -5   0   11.22    1.22 
  -7   5   0   11.60    1.54 
   7  -5   0    8.46    1.29 
  -7   5   0    9.88    1.40 
  -7   5   0    9.37    1.47 
  -7   5   0    9.49    1.42 
  -7   5   0   10.95    1.43 
   7   5   0    9.15    1.02 
   7   5   0    9.92    1.19 
  -7  -5   0    9.37    1.23 
   7  -5   0   10.37    1.39 
   7  -5   0   11.50    1.61 
   7  -5   0    8.31    1.39 
  -8   5   0   38.22    2.36 
   8  -5   0   45.21    2.49 
  -8  -5   0   40.63    1.88 
   8  -5   0   41.39    2.67 
   8  -5   0   38.60    2.48 
   8   5   0   38.83    1.90 
  -8   5   0   38.92    2.94 
  -8   5   0   43.25    2.71 
   8  -5   0   42.96    1.46 
   8   5   0   43.71    2.58 
   8  -5   0   41.38    2.70 
  -8   5   0   35.78    2.51 
   8   5   0   36.84    2.00 
   8   5   0   38.31    1.85 
  -8  -5   0   40.63    2.00 
  -8  -5   0   41.55    1.95 
  -8  -5   0   42.35    2.00 
  -8   5   0   41.99    2.57 
  -8  -5   0   38.09    1.87 
   8   5   0   37.37    1.79 
   8  -5   0   37.60    2.56 
   8   5   0   38.96    1.98 
  -8   5   0   44.68    2.74 
   8  -5   0   37.27    2.85 
   9  -5   0   12.71    2.04 
  -9   5   0    9.72    1.70 
  -9  -5   0   10.61    1.42 
   9   5   0    8.95    1.16 
  -9  -5   0   11.42    2.04 
  -9   5   0   12.88    2.94 
  -9   5   0   15.02    2.12 
  -9   5   0    9.29    1.71 
  -9  -5   0   13.11    1.65 
   9   5   0    9.64    1.08 
   9  -5   0    8.73    1.11 
  -9   5   0    9.36    1.48 
   9  -5   0   10.34    1.70 
   9   5   0    9.30    1.08 
   9   5   0    9.37    1.24 
  -9  -5   0   12.20    1.62 
   9  -5   0    9.83    1.75 
  -9   5   0    9.86    1.66 
   9   5   0   10.83    1.62 
   9  -5   0   12.63    1.80 
  -9  -5   0   10.13    1.17 
   9  -5   0   11.29    1.68 
 -10  -5   0   -0.17    1.00 
  10  -5   0   -1.07    1.54 
  10   5   0    0.21    1.13 
  10   5   0   -0.56    1.09 
 -10  -5   0    1.00    1.09 
  10   5   0    1.68    1.51 
 -10   5   0   -0.80    1.30 
  10  -5   0   -0.79    1.63 
 -10   5   0   -0.08    1.57 
  10  -5   0    1.85    1.60 
  10   5   0    0.59    0.93 
  10   5   0    1.18    1.01 
 -10   5   0    1.60    1.74 
  10  -5   0   -0.48    1.81 
 -10   5   0    0.70    1.57 
 -10   5   0    2.55    1.52 
  10   5   0    0.10    0.97 
 -10   5   0   -2.33    1.45 
  10  -5   0   -0.73    1.53 
 -10  -5   0    0.50    0.94 
 -10  -5   0   -0.27    1.05 
 -10  -5   0   -2.35    0.95 
 -11  -5   0   37.27    2.61 
  11  -5   0   37.63    3.39 
  11  -5   0   32.37    3.28 
 -11  -5   0   33.61    2.31 
 -11   5   0   35.01    3.70 
 -11   5   0   31.26    3.27 
 -11  -5   0   33.30    2.26 
 -11   5   0   30.95    3.17 
 -11  -5   0   37.96    2.46 
  11   5   0   31.43    2.30 
  11  -5   0   32.90    4.08 
  11   5   0   36.21    3.20 
 -11  -5   0   33.12    2.45 
 -11   5   0   37.20    3.48 
  11   5   0   34.03    2.45 
  11   5   0   41.12    2.64 
 -11  -5   0   31.72    3.17 
  11   5   0   37.35    2.61 
 -11   5   0   29.05    2.83 
 -11   5   0   31.38    3.02 
 -12  -5   0   34.79    2.67 
  12   5   0   45.46    3.84 
 -12  -5   0   31.26    2.73 
 -12  -5   0   32.81    2.93 
  12  -5   0   36.50    3.86 
 -12   5   0   32.16    3.93 
 -12  -5   0   32.87    2.80 
  12   5   0   38.05    4.18 
 -12   5   0   46.16    4.30 
 -12   5   0   33.00    3.90 
 -12   5   0   30.93    3.60 
 -12  -5   0   27.40    3.32 
  12  -5   0   39.85    3.81 
 -13   5   0    5.20    2.38 
 -13  -5   0    4.56    1.76 
  13   5   0    5.69    2.33 
 -13   5   0    2.13    2.46 
 -13   5   0    4.88    2.79 
 -13  -5   0    4.59    1.71 
   0  -6   0   97.97    2.93 
   0  -6   0   97.14    2.93 
   0   6   0   93.01    3.02 
   0   6   0   98.67    2.92 
   0   6   0   99.66    3.01 
   0  -6   0   98.69    2.91 
   0   6   0   98.03    2.94 
   0   6   0   95.23    2.88 
   0  -6   0   97.81    2.89 
   0   6   0   98.34    2.92 
   0  -6   0   97.22    3.07 
   0   6   0   99.16    2.96 
   0  -6   0   96.34    2.92 
   0  -6   0   96.53    2.99 
  -1   6   0   38.44    1.62 
  -1  -6   0   38.93    1.52 
  -1  -6   0   40.25    1.56 
   1  -6   0   35.90    1.58 
  -1   6   0   37.67    1.68 
   1  -6   0   39.62    1.75 
  -1   6   0   39.56    1.73 
   1   6   0   39.75    1.78 
  -1  -6   0   38.43    1.54 
  -1  -6   0   39.47    1.51 
  -1  -6   0   38.60    1.42 
  -1  -6   0   39.49    1.74 
  -1   6   0   39.26    1.73 
   1  -6   0   37.11    1.65 
  -1   6   0   40.10    1.72 
  -1   6   0   39.02    1.62 
  -1   6   0   39.66    1.65 
   1   6   0   40.58    1.55 
  -1  -6   0   40.23    1.74 
   1  -6   0   38.38    1.69 
   1  -6   0   38.70    1.64 
   1  -6   0   39.78    1.72 
   1  -6   0   39.69    1.70 
   1   6   0   39.53    1.50 
  -2   6   0   44.69    1.91 
   2  -6   0   47.68    1.99 
   2  -6   0   45.02    2.02 
  -2   6   0   43.51    1.88 
   2  -6   0   44.71    1.96 
   2   6   0   43.07    1.62 
   2   6   0   44.57    1.62 
  -2  -6   0   47.14    2.06 
  -2  -6   0   45.13    1.63 
   2  -6   0   45.06    1.69 
  -2  -6   0   44.71    1.64 
  -2   6   0   46.62    2.08 
   2  -6   0   45.92    1.96 
  -2  -6   0   43.72    1.64 
   2  -6   0   45.39    1.92 
  -2   6   0   44.53    1.89 
   2  -6   0   46.68    1.87 
   2   6   0   44.29    1.63 
   2   6   0   45.95    2.04 
   2   6   0   42.91    1.59 
  -2  -6   0   44.56    1.65 
  -2  -6   0   45.03    1.97 
  -2   6   0   47.12    1.99 
  -2   6   0   44.44    1.89 
  -2  -6   0   44.78    1.44 
  -3   6   0   10.23    1.46 
  -3   6   0   10.93    1.17 
   3   6   0    9.37    0.84 
  -3  -6   0    9.80    1.16 
  -3   6   0   10.64    1.40 
   3  -6   0   10.81    1.39 
  -3   6   0   10.70    1.15 
  -3  -6   0   11.37    0.94 
   3   6   0   10.81    0.86 
   3  -6   0    9.63    1.18 
  -3   6   0   10.41    1.28 
   3  -6   0   10.76    1.22 
   3   6   0    9.71    0.88 
   3  -6   0    9.36    1.31 
  -3  -6   0    9.73    0.59 
  -3  -6   0    9.94    0.90 
   3   6   0   11.71    1.44 
   3  -6   0    9.45    1.23 
   3  -6   0    9.59    1.39 
  -3  -6   0   10.30    0.91 
  -3   6   0   11.48    1.42 
   3   6   0    9.43    0.86 
  -3  -6   0   10.23    0.86 
   3  -6   0   10.05    0.94 
  -4  -6   0   10.81    0.58 
  -4   6   0   11.00    1.29 
   4  -6   0   10.49    1.24 
   4  -6   0   10.40    1.28 
   4   6   0   10.71    0.92 
   4   6   0   10.46    0.86 
   4  -6   0   14.35    1.40 
  -4   6   0   12.29    1.36 
  -4  -6   0   11.02    1.15 
  -4  -6   0   11.11    0.95 
   4  -6   0   12.14    0.89 
  -4   6   0   10.04    1.23 
   4   6   0    9.59    0.86 
  -4  -6   0   10.59    1.37 
  -4  -6   0   12.90    0.96 
   4  -6   0    9.67    1.18 
   4   6   0   12.68    0.93 
   4   6   0   10.89    1.51 
   4  -6   0    9.94    1.39 
   4  -6   0   13.05    1.38 
  -4   6   0    8.06    1.17 
  -4   6   0   11.97    1.26 
  -4   6   0    9.30    1.19 
  -4  -6   0   12.19    0.89 
   5  -6   0   89.77    3.90 
   5  -6   0   98.43    3.41 
  -5  -6   0   86.29    2.47 
  -5   6   0   94.01    3.35 
  -5   6   0   90.36    3.24 
  -5   6   0   90.06    3.54 
  -5   6   0   96.42    3.45 
  -5  -6   0   93.70    2.79 
   5  -6   0   92.00    3.25 
   5   6   0   91.42    2.78 
   5   6   0   93.35    2.79 
  -5   6   0   96.71    3.23 
   5   6   0   91.02    2.75 
   5  -6   0   93.40    3.36 
   5  -6   0   92.14    2.65 
   5  -6   0   93.36    3.38 
  -5   6   0   95.85    3.46 
  -5  -6   0   94.89    2.79 
  -5  -6   0   95.65    2.81 
   5  -6   0   97.17    3.35 
   5   6   0   95.79    2.75 
   5   6   0   95.03    3.40 
  -5  -6   0   92.46    3.29 
  -5  -6   0   86.69    2.72 
   6  -6   0   36.23    2.44 
  -6   6   0   36.82    2.03 
   6   6   0   35.37    1.54 
  -6  -6   0   41.01    1.66 
   6  -6   0   38.24    2.23 
  -6  -6   0   39.98    1.35 
   6  -6   0   35.64    3.23 
   6  -6   0   38.95    2.28 
  -6  -6   0   38.35    1.65 
   6   6   0   42.17    2.29 
   6   6   0   36.23    1.61 
  -6   6   0   37.75    2.35 
   6  -6   0   37.08    2.17 
  -6   6   0   35.09    2.15 
  -6   6   0   39.31    2.23 
  -6  -6   0   38.19    1.64 
   6   6   0   38.00    1.63 
   6  -6   0   34.79    1.35 
   6  -6   0   37.90    2.20 
  -6   6   0   38.12    2.53 
  -6   6   0   36.62    2.16 
   6   6   0   38.01    1.57 
  -6  -6   0   35.50    1.55 
  -7   6   0   -0.21    1.14 
   7   6   0    1.25    0.63 
   7   6   0    0.29    1.17 
  -7   6   0    0.86    1.08 
   7   6   0   -0.25    0.58 
   7  -6   0    1.82    1.07 
   7  -6   0    1.28    1.02 
  -7   6   0   -0.06    1.17 
   7  -6   0    0.58    1.07 
  -7  -6   0    1.44    0.73 
   7  -6   0    1.10    1.18 
  -7   6   0    0.70    1.12 
   7  -6   0    1.86    1.16 
  -7  -6   0    0.92    0.69 
   7   6   0    0.56    0.72 
   7  -6   0    1.30    1.17 
  -7  -6   0   -0.17    0.62 
   7  -6   0    1.20    0.47 
  -7  -6   0    0.84    0.51 
  -7   6   0    0.61    1.08 
  -7  -6   0    0.65    0.65 
   8   6   0    4.23    0.80 
   8   6   0    5.34    0.97 
  -8  -6   0    5.59    0.95 
   8   6   0    3.82    0.86 
  -8  -6   0    4.35    0.86 
  -8  -6   0    4.68    0.94 
  -8   6   0    4.91    1.28 
   8  -6   0    3.96    0.52 
   8  -6   0    3.92    1.54 
  -8   6   0    3.75    1.30 
   8  -6   0    4.19    1.43 
   8   6   0    3.44    0.90 
   8   6   0    5.83    1.44 
  -8   6   0    3.95    1.32 
  -8  -6   0    3.92    0.92 
   8  -6   0    4.06    1.26 
  -8   6   0    4.88    1.26 
  -8   6   0    6.10    1.64 
   8  -6   0    4.36    1.42 
  -8  -6   0    4.13    0.76 
  -8   6   0    5.16    1.48 
   8  -6   0    5.33    1.36 
   8  -6   0    3.65    1.49 
  -9   6   0   41.53    2.94 
   9  -6   0   42.60    3.37 
   9  -6   0   37.40    2.96 
   9   6   0   35.36    2.11 
  -9  -6   0   43.10    1.94 
  -9  -6   0   37.07    1.99 
  -9  -6   0   42.59    2.24 
  -9   6   0   46.36    4.36 
   9   6   0   41.03    2.22 
  -9  -6   0   43.14    2.18 
   9  -6   0   41.62    2.96 
  -9   6   0   40.32    3.54 
   9   6   0   41.95    2.01 
   9   6   0   44.08    2.89 
  -9   6   0   44.11    3.00 
   9  -6   0   44.16    2.78 
   9   6   0   42.03    2.05 
  -9   6   0   38.46    2.64 
  -9  -6   0   42.72    2.14 
  -9   6   0   42.26    2.86 
   9  -6   0   38.45    2.96 
   9  -6   0   41.09    2.99 
  10  -6   0   36.44    3.23 
 -10   6   0   35.36    3.02 
 -10  -6   0   37.02    2.20 
 -10   6   0   34.29    3.22 
 -10  -6   0   33.76    2.03 
  10  -6   0   35.08    3.19 
  10  -6   0   38.27    3.21 
 -10  -6   0   34.17    2.26 
  10   6   0   36.94    2.38 
 -10   6   0   36.29    3.48 
  10   6   0   35.00    2.32 
 -10   6   0   34.02    3.06 
  10   6   0   35.22    2.14 
  10  -6   0   28.96    3.70 
 -10   6   0   35.64    3.18 
  10   6   0   35.61    2.10 
 -10  -6   0   39.83    2.04 
 -10   6   0   35.84    2.82 
  10  -6   0   33.33    3.17 
 -10  -6   0   38.04    2.35 
  10   6   0   33.65    3.01 
 -11   6   0    3.69    2.01 
 -11   6   0    7.26    2.06 
  11  -6   0    4.90    2.14 
  11   6   0    5.34    1.21 
 -11  -6   0    3.97    1.16 
  11   6   0    1.17    1.94 
  11  -6   0    9.17    2.15 
 -11  -6   0    5.63    1.23 
 -11  -6   0    4.60    1.40 
 -11   6   0    4.52    2.24 
  11   6   0    3.84    2.42 
 -11  -6   0    6.27    1.31 
 -11  -6   0    5.94    1.37 
 -11   6   0    7.83    2.10 
 -11   6   0    8.01    2.14 
 -11   6   0    4.84    1.75 
  11   6   0    4.22    1.43 
 -12  -6   0    3.11    1.59 
  12   6   0    4.86    2.11 
  12  -6   0    3.43    2.70 
 -12   6   0    6.25    2.43 
  12   6   0    6.38    1.88 
 -12   6   0   -1.03    2.09 
  12  -6   0    1.30    3.02 
 -12   6   0    7.00    2.55 
 -12   6   0    5.06    2.71 
 -12  -6   0    6.14    1.57 
 -12  -6   0    4.54    1.50 
 -12   6   0    2.71    2.26 
  13   6   0   -0.67    2.37 
 -13   6   0   -5.31    2.37 
 -13   6   0   -0.86    2.45 
 -13  -6   0    3.36    1.64 
  13  -6   0    4.27    2.88 
 -13   6   0    0.52    2.79 
 -13  -6   0   -2.14    1.62 
   0  -7   0    0.23    0.58 
   0  -7   0   -0.51    0.64 
   0   7   0    0.00    0.56 
   0  -7   0    0.13    0.60 
   0   7   0   -0.63    0.58 
   0  -7   0   -0.71    0.66 
   0  -7   0   -0.36    0.62 
   0  -7   0   -0.26    0.56 
   0   7   0   -0.59    0.60 
   0  -7   0   -0.80    0.61 
   0   7   0   -0.28    0.71 
   0   7   0    0.28    0.55 
   0   7   0   -0.35    0.59 
   0   7   0   -0.07    0.61 
   1  -7   0   -0.69    0.61 
  -1  -7   0    0.01    0.53 
   1  -7   0   -0.09    0.66 
   1  -7   0   -0.29    0.75 
  -1  -7   0   -0.29    0.70 
  -1   7   0   -0.32    0.69 
  -1  -7   0    0.21    0.61 
  -1  -7   0   -0.12    0.60 
   1  -7   0   -0.17    0.73 
  -1   7   0    0.16    0.65 
  -1   7   0    0.37    0.67 
  -1   7   0   -0.21    0.63 
  -1   7   0    0.49    0.60 
   1  -7   0    0.88    0.77 
   1   7   0    0.94    0.64 
   1  -7   0    0.33    0.66 
  -1  -7   0    0.20    0.67 
   1   7   0   -0.28    0.73 
  -1   7   0   -0.07    0.71 
   1  -7   0   -0.27    0.63 
  -1  -7   0    0.24    0.50 
   1   7   0    0.19    0.51 
  -1  -7   0   -0.64    0.52 
  -1   7   0   -0.47    0.68 
  -2   7   0  329.53    8.57 
  -2   7   0  314.09    8.48 
   2   7   0  317.52    8.21 
   2  -7   0  324.46    8.29 
   2   7   0  331.41    8.26 
   2  -7   0  328.84    8.56 
  -2  -7   0  313.66    8.23 
  -2  -7   0  326.05    8.26 
   2  -7   0  330.21    8.62 
  -2   7   0  324.29    8.55 
  -2  -7   0  319.41    8.04 
   2  -7   0  323.80    8.57 
  -2  -7   0  318.27    8.59 
   2   7   0  334.88    8.26 
  -2  -7   0  317.71    8.21 
  -2   7   0  328.78    8.50 
   2  -7   0  328.40    8.55 
   2  -7   0  328.55    8.51 
  -2  -7   0  310.72    8.25 
   2   7   0  311.93    8.33 
  -2   7   0  322.28    8.51 
   2   7   0  326.50    8.59 
  -2  -7   0  324.26    8.56 
  -2   7   0  325.17    8.61 
   2  -7   0  316.96    8.50 
  -3   7   0   87.19    3.24 
  -3   7   0   89.56    3.15 
   3  -7   0   88.50    3.10 
   3   7   0   87.73    2.64 
  -3   7   0   88.12    2.98 
   3  -7   0   88.75    3.13 
   3  -7   0   87.13    3.10 
   3   7   0   80.92    2.62 
   3   7   0   86.62    3.15 
   3  -7   0   88.96    3.20 
   3  -7   0   87.21    2.68 
   3  -7   0   84.93    3.07 
  -3  -7   0   83.47    2.65 
  -3  -7   0   84.62    2.33 
  -3   7   0   86.96    3.15 
  -3  -7   0   85.32    3.08 
   3   7   0   84.64    2.61 
  -3   7   0   86.01    3.03 
   3   7   0   87.64    2.65 
  -3  -7   0   85.08    2.63 
  -3  -7   0   82.90    2.62 
   3  -7   0   85.91    3.05 
  -3   7   0   82.55    3.01 
  -4   7   0   16.69    1.45 
  -4   7   0   14.46    1.50 
   4   7   0   16.72    1.66 
   4  -7   0   13.05    1.53 
  -4   7   0   18.13    1.72 
   4   7   0   14.40    1.05 
   4  -7   0   16.30    1.69 
   4  -7   0   15.91    1.69 
  -4   7   0   13.21    1.50 
   4   7   0   13.69    1.05 
  -4  -7   0   14.58    1.12 
   4  -7   0   13.57    1.57 
  -4   7   0   15.05    1.73 
  -4   7   0   12.98    1.67 
   4   7   0   14.39    1.01 
   4  -7   0   16.61    1.74 
   4   7   0   15.84    1.02 
   4  -7   0   15.13    1.08 
  -4  -7   0   15.23    1.09 
  -4  -7   0   14.29    1.02 
   4  -7   0   16.30    1.56 
  -4  -7   0   13.77    1.59 
   5  -7   0   55.21    2.60 
  -5   7   0   52.76    2.78 
   5  -7   0   49.16    1.77 
  -5  -7   0   52.42    1.91 
   5  -7   0   52.83    2.54 
  -5   7   0   55.51    2.66 
  -5   7   0   51.73    2.46 
  -5  -7   0   51.00    1.83 
  -5   7   0   54.20    2.65 
   5  -7   0   53.09    2.46 
  -5   7   0   50.95    2.43 
   5  -7   0   50.19    2.71 
   5  -7   0   53.51    2.47 
   5   7   0   43.71    2.30 
   5   7   0   53.47    2.55 
  -5   7   0   49.41    2.33 
   5   7   0   51.38    1.90 
   5   7   0   50.75    1.83 
  -5  -7   0   55.49    1.94 
  -5  -7   0   49.80    1.91 
   5  -7   0   51.67    2.92 
   5   7   0   48.55    1.87 
  -6  -7   0   25.62    1.33 
   6   7   0   24.95    1.31 
   6   7   0   26.07    2.12 
   6   7   0   25.49    1.40 
  -6   7   0   27.07    2.24 
   6  -7   0   27.85    2.04 
   6   7   0   24.60    1.31 
   6  -7   0   24.63    1.17 
   6  -7   0   23.19    2.07 
   6   7   0   23.06    1.39 
  -6   7   0   23.77    1.86 
  -6   7   0   22.67    2.02 
  -6  -7   0   27.90    1.43 
  -6   7   0   24.64    1.99 
   6  -7   0   24.74    2.00 
   6  -7   0   22.58    2.10 
  -6  -7   0   24.14    1.44 
  -6   7   0   27.37    2.31 
  -6  -7   0   24.61    1.37 
   6  -7   0   24.83    2.32 
   6  -7   0   22.16    2.26 
  -6   7   0   18.48    2.65 
  -6  -7   0   24.54    2.02 
  -7   7   0   -0.93    1.08 
  -7   7   0    0.87    1.33 
   7   7   0   -0.25    0.61 
  -7   7   0    1.66    1.05 
  -7  -7   0    0.37    0.62 
  -7  -7   0   -0.48    0.69 
  -7  -7   0    0.79    0.69 
  -7  -7   0    0.66    0.72 
   7  -7   0    0.69    0.47 
   7   7   0   -0.49    1.16 
   7   7   0    0.16    0.62 
  -7   7   0   -1.45    1.15 
   7  -7   0    0.24    1.06 
   7  -7   0   -0.61    1.14 
   7  -7   0    1.91    1.24 
   7   7   0    0.23    0.72 
   7  -7   0    0.09    1.14 
  -7   7   0   -1.21    1.09 
  -7   7   0    0.54    1.19 
   7  -7   0   -0.44    1.27 
   7  -7   0   -2.04    1.13 
   7   7   0    0.83    0.69 
  -8  -7   0   69.79    2.14 
   8   7   0   69.09    2.63 
  -8   7   0   60.51    5.01 
  -8  -7   0   74.28    2.57 
   8   7   0   66.71    2.45 
  -8  -7   0   69.53    2.62 
  -8   7   0   70.68    3.81 
  -8  -7   0   67.01    2.46 
   8   7   0   67.41    3.43 
   8   7   0   63.87    2.54 
   8  -7   0   71.95    3.53 
  -8   7   0   66.44    3.37 
  -8   7   0   70.88    3.23 
  -8   7   0   69.10    3.59 
  -8   7   0   63.66    3.36 
  -8  -7   0   68.25    2.58 
   8  -7   0   69.35    3.49 
   8  -7   0   68.64    3.23 
   8   7   0   69.60    2.49 
   8  -7   0   70.40    3.32 
   8  -7   0   71.93    3.57 
   8  -7   0   67.55    1.99 
   8  -7   0   69.15    3.83 
   9  -7   0    4.75    1.52 
   9   7   0    6.25    1.14 
   9  -7   0   10.69    1.90 
   9   7   0    5.70    0.99 
   9  -7   0    8.51    2.03 
   9   7   0    6.10    1.70 
   9  -7   0    7.23    1.51 
  -9   7   0    5.71    1.94 
  -9   7   0    7.11    1.78 
  -9  -7   0    6.60    0.78 
  -9   7   0    6.55    1.64 
   9  -7   0    8.31    1.86 
  -9  -7   0    6.84    1.09 
   9  -7   0    6.35    1.86 
   9   7   0    5.55    0.93 
   9   7   0    6.12    1.08 
  -9   7   0    6.31    1.83 
  -9  -7   0    6.96    1.12 
  -9   7   0    5.74    1.51 
  -9   7   0    5.57    1.70 
  -9  -7   0    6.09    1.00 
  -9  -7   0    6.25    1.09 
 -10  -7   0    3.71    1.10 
 -10  -7   0    2.53    0.99 
 -10  -7   0    1.37    1.05 
  10   7   0    1.73    1.10 
  10  -7   0    2.77    2.37 
  10  -7   0    3.95    1.78 
 -10  -7   0    3.20    1.21 
  10  -7   0    3.08    1.87 
  10   7   0    1.59    2.98 
 -10   7   0   -0.67    1.72 
 -10   7   0    0.41    1.55 
  10   7   0    2.28    0.97 
 -10   7   0    0.23    1.81 
  10  -7   0    1.56    1.75 
  10   7   0    3.32    1.04 
  10   7   0    2.20    1.18 
 -10   7   0    1.91    1.90 
 -10   7   0    0.16    1.73 
 -11  -7   0   29.01    2.34 
  11   7   0   29.91    3.38 
 -11   7   0   25.91    2.87 
  11  -7   0   26.91    2.88 
 -11   7   0   27.02    3.45 
 -11   7   0   27.52    3.49 
  11   7   0   25.85    2.16 
  11   7   0   27.54    2.48 
 -11  -7   0   26.75    2.21 
 -11   7   0   27.52    3.93 
 -11  -7   0   32.58    2.50 
 -11  -7   0   19.00    2.00 
  11  -7   0   25.76    3.27 
 -11   7   0   28.39    2.98 
  11   7   0   28.64    2.25 
 -11   7   0   23.37    2.49 
  12   7   0   20.24    2.73 
  12  -7   0   14.26    2.92 
 -12  -7   0   16.41    2.27 
  12   7   0   17.77    2.14 
 -12   7   0   16.74    2.78 
 -12   7   0   15.43    3.28 
 -12   7   0   15.02    2.73 
 -12   7   0   14.21    2.68 
 -12  -7   0   16.93    1.73 
 -12   7   0   11.72    2.83 
 -12  -7   0   18.25    2.43 
  13   7   0    1.54    2.61 
 -13   7   0    4.08    3.08 
  13  -7   0   -3.29    3.00 
 -13   7   0    4.23    3.18 
 -13  -7   0    1.56    1.56 
   0   8   0  166.76    4.93 
   0  -8   0  171.68    4.80 
   0  -8   0  169.59    4.81 
   0   8   0  162.78    4.75 
   0  -8   0  169.44    4.81 
   0  -8   0  165.65    4.87 
   0  -8   0  163.39    4.80 
   0   8   0  164.33    4.78 
   0   8   0  172.04    4.83 
   0  -8   0  166.99    4.98 
   0  -8   0  169.12    4.76 
   0   8   0  167.12    4.75 
   0   8   0  170.73    4.91 
  -1   8   0    0.89    0.81 
   1  -8   0    0.23    0.71 
   1   8   0    0.01    0.65 
   1  -8   0   -0.27    0.65 
   1  -8   0    0.59    0.83 
   1  -8   0    0.26    0.84 
  -1  -8   0   -0.27    0.89 
  -1   8   0    0.65    0.81 
  -1   8   0    1.29    0.72 
  -1   8   0   -0.08    0.74 
  -1  -8   0    0.60    0.69 
  -1  -8   0    0.53    0.55 
  -1  -8   0   -0.85    0.77 
   1   8   0    0.69    0.56 
   1  -8   0    0.64    0.71 
   1   8   0    0.23    0.70 
  -1   8   0    0.37    0.63 
   1  -8   0    0.39    0.84 
   1  -8   0    0.39    0.72 
  -1   8   0    0.46    0.71 
  -1  -8   0    0.09    0.64 
  -1   8   0    0.72    0.78 
   1   8   0    0.00    0.80 
  -1  -8   0   -0.12    0.59 
  -1  -8   0    0.88    0.70 
   2   8   0    0.57    0.66 
  -2  -8   0   -0.54    0.62 
  -2   8   0   -0.22    0.84 
  -2  -8   0    1.51    0.91 
   2  -8   0   -0.92    0.78 
   2  -8   0   -0.73    0.62 
  -2   8   0   -0.25    0.67 
   2   8   0   -0.58    0.51 
  -2   8   0    0.26    0.70 
  -2  -8   0   -0.66    0.57 
  -2  -8   0    0.81    0.67 
   2  -8   0    0.23    0.81 
  -2  -8   0   -0.17    0.46 
   2  -8   0   -0.38    0.72 
   2   8   0    0.09    0.53 
   2   8   0   -0.58    0.86 
  -2   8   0    0.94    0.85 
  -2  -8   0   -1.49    0.85 
   2  -8   0   -1.47    0.76 
  -2   8   0   -0.57    0.67 
  -2   8   0    0.28    0.83 
   2  -8   0   -0.39    0.75 
  -2  -8   0    0.01    0.57 
   2  -8   0    0.67    0.80 
   2   8   0   -0.29    0.56 
   3  -8   0   31.20    1.92 
  -3   8   0   29.03    1.97 
  -3   8   0   29.01    1.91 
   3   8   0   26.90    1.38 
  -3   8   0   27.20    2.02 
  -3  -8   0   23.72    1.82 
  -3  -8   0   27.65    1.45 
  -3  -8   0   24.86    1.43 
  -3  -8   0   24.66    1.39 
  -3   8   0   28.73    1.83 
   3   8   0   25.67    1.34 
  -3   8   0   26.12    1.72 
   3   8   0   28.09    1.94 
  -3  -8   0   27.10    1.08 
   3  -8   0   26.63    1.92 
   3  -8   0   26.96    1.77 
   3  -8   0   28.84    1.73 
  -3  -8   0   30.90    1.49 
   3  -8   0   26.43    1.82 
  -3   8   0   24.32    1.73 
   3  -8   0   26.87    1.47 
  -3  -8   0   28.64    1.99 
   3  -8   0   29.62    1.94 
   3   8   0   23.84    1.36 
   4  -8   0   39.78    2.16 
   4  -8   0   39.74    2.25 
  -4   8   0   36.58    2.33 
   4  -8   0   35.92    2.14 
  -4  -8   0   34.29    1.55 
  -4   8   0   35.17    1.97 
   4   8   0   36.78    1.55 
  -4  -8   0   34.49    1.09 
  -4   8   0   35.58    2.09 
   4  -8   0   33.84    2.66 
   4  -8   0   35.89    2.15 
  -4   8   0   33.41    2.20 
   4   8   0   37.51    2.26 
   4   8   0   36.30    1.60 
  -4  -8   0   38.88    1.72 
  -4  -8   0   38.46    1.64 
  -4  -8   0   33.26    2.54 
   4   8   0   37.47    1.60 
   4  -8   0   37.99    1.63 
   4  -8   0   36.94    2.21 
  -4   8   0   38.53    2.26 
  -4   8   0   37.03    2.10 
  -4  -8   0   36.35    1.62 
   5   8   0   81.36    2.59 
   5  -8   0   75.30    2.48 
   5  -8   0   78.23    3.29 
   5  -8   0   80.68    3.16 
  -5   8   0   77.51    3.32 
  -5  -8   0   79.44    2.58 
   5   8   0   80.16    2.52 
  -5  -8   0   75.78    2.57 
   5   8   0   78.11    2.49 
   5  -8   0   79.65    3.29 
  -5   8   0   76.15    3.16 
  -5  -8   0   74.58    2.46 
  -5   8   0   77.78    3.20 
  -5   8   0   77.84    3.02 
   5   8   0   74.43    2.53 
   5  -8   0   75.80    3.14 
   5   8   0   80.29    3.31 
   5  -8   0   76.60    3.42 
  -5  -8   0   77.48    3.24 
  -5   8   0   76.76    3.20 
   5  -8   0   75.89    3.23 
  -6  -8   0   21.04    1.39 
  -6   8   0   19.83    1.89 
  -6   8   0   22.72    2.21 
   6  -8   0   17.87    2.13 
  -6   8   0   19.02    2.43 
  -6   8   0   17.83    2.07 
   6  -8   0   21.43    2.17 
   6  -8   0   21.91    2.09 
   6  -8   0   19.98    2.25 
   6  -8   0   16.52    2.33 
   6   8   0   18.81    1.33 
   6   8   0   19.25    1.27 
  -6  -8   0   20.14    1.36 
   6   8   0   20.24    1.27 
   6   8   0   17.97    1.57 
  -6  -8   0   19.16    1.40 
  -6  -8   0   17.27    1.26 
  -6   8   0   19.33    1.87 
   6  -8   0   18.61    1.20 
  -6   8   0   19.92    2.00 
  -6  -8   0   21.31    2.09 
   6   8   0   20.21    2.20 
   6  -8   0   18.76    2.08 
   7   8   0    4.57    0.77 
  -7  -8   0    5.35    0.85 
  -7   8   0    4.38    1.48 
  -7  -8   0    5.51    1.42 
   7  -8   0    1.10    1.26 
  -7   8   0    1.61    1.14 
   7   8   0    3.21    0.84 
   7  -8   0    3.09    0.64 
  -7   8   0    2.72    1.35 
   7  -8   0    2.94    1.39 
   7  -8   0    2.52    1.42 
  -7  -8   0    4.49    0.87 
   7  -8   0    2.87    1.43 
   7   8   0    2.54    0.82 
   7   8   0    4.67    1.38 
   7  -8   0    2.38    1.37 
   7  -8   0    5.63    1.37 
  -7   8   0    3.93    1.68 
   7   8   0    3.24    0.73 
  -7  -8   0    2.98    0.83 
  -7   8   0    3.70    1.50 
  -7   8   0    3.34    1.39 
  -7  -8   0    3.83    0.77 
   8  -8   0    0.48    1.27 
  -8   8   0   -0.30    1.58 
   8   8   0    0.88    0.74 
   8   8   0    0.79    0.74 
  -8  -8   0    1.67    0.86 
   8  -8   0    1.20    1.54 
  -8   8   0    2.61    1.54 
   8   8   0    1.52    1.55 
   8  -8   0   -0.78    1.54 
   8  -8   0   -1.91    1.43 
  -8  -8   0    1.65    0.86 
  -8   8   0    2.36    1.52 
   8   8   0    1.36    0.94 
  -8   8   0    2.35    1.22 
   8   8   0    1.24    0.85 
   8  -8   0    0.49    1.60 
   8  -8   0    2.37    0.52 
  -8  -8   0    0.01    1.00 
   8  -8   0    1.90    1.57 
  -8   8   0    2.09    1.69 
  -8   8   0    0.45    1.57 
  -8  -8   0    0.57    0.74 
   9  -8   0   55.57    3.28 
  -9   8   0   67.69    4.08 
   9  -8   0   53.01    4.00 
  -9   8   0   54.08    3.46 
  -9   8   0   55.77    3.60 
  -9   8   0   61.06    3.42 
   9  -8   0   53.80    3.33 
   9   8   0   50.76    2.22 
   9  -8   0   57.54    3.64 
  -9  -8   0   53.32    2.42 
   9  -8   0   52.44    3.61 
  -9  -8   0   50.83    2.23 
  -9  -8   0   54.89    2.48 
   9   8   0   51.33    2.44 
  -9   8   0   47.04    3.41 
  -9   8   0   53.97    3.15 
   9   8   0   55.04    2.29 
  -9  -8   0   56.94    2.37 
   9  -8   0   53.86    3.63 
  10  -8   0    0.30    2.38 
  10   8   0    1.17    1.78 
 -10   8   0    2.03    1.63 
 -10  -8   0    1.66    1.18 
  10  -8   0    3.14    1.94 
 -10  -8   0    1.13    1.02 
  10   8   0   -1.06    1.15 
 -10   8   0    0.78    1.81 
 -10   8   0    3.17    2.00 
 -10  -8   0    0.13    1.05 
 -10   8   0    1.30    1.91 
  10  -8   0   -0.88    1.89 
 -10  -8   0    0.15    0.98 
 -10   8   0   -0.69    2.12 
 -10   8   0    3.70    1.89 
  10  -8   0    0.31    2.51 
  10   8   0   -1.23    1.01 
  10   8   0    2.12    0.97 
 -11   8   0   13.53    4.46 
 -11  -8   0   14.12    1.72 
 -11  -8   0   13.25    1.47 
  11   8   0   16.65    2.30 
 -11   8   0   11.41    2.27 
 -11   8   0   13.65    2.66 
 -11   8   0   14.05    2.67 
 -11   8   0   13.62    2.73 
  11  -8   0   15.50    2.63 
  11   8   0   13.62    1.86 
 -11  -8   0   12.47    1.50 
  11   8   0   14.21    2.43 
 -11  -8   0   14.74    1.61 
  11  -8   0    9.87    2.45 
 -11   8   0    8.66    2.44 
 -12  -8   0    6.67    1.47 
 -12   8   0    6.50    2.98 
 -12   8   0    5.90    2.98 
 -12   8   0    4.99    2.52 
  12  -8   0    6.09    2.78 
  12   8   0    2.40    1.76 
 -12   8   0    4.51    3.07 
 -12   8   0    7.74    2.64 
  12   8   0    4.53    2.45 
 -12  -8   0    5.33    1.49 
   0   9   0   -0.59    0.75 
   0  -9   0    1.03    0.85 
   0   9   0    0.19    0.79 
   0  -9   0    0.20    0.78 
   0  -9   0    0.71    0.84 
   0   9   0    0.83    0.89 
   0   9   0   -0.01    0.69 
   0  -9   0    0.42    0.67 
   0  -9   0    0.73    0.70 
   0  -9   0    0.50    0.71 
   0  -9   0    0.75    0.84 
  -1   9   0   33.16    1.85 
   1  -9   0   34.83    1.85 
  -1   9   0   34.30    1.96 
   1  -9   0   35.92    2.10 
  -1  -9   0   33.08    1.75 
  -1   9   0   37.74    1.97 
   1   9   0   33.32    1.70 
  -1   9   0   37.08    2.02 
   1  -9   0   38.63    2.00 
  -1  -9   0   35.77    1.80 
  -1  -9   0   35.89    2.15 
   1  -9   0   35.28    2.02 
  -1  -9   0   34.00    1.64 
   1  -9   0   35.51    1.93 
   1   9   0   31.97    1.72 
  -1   9   0   37.28    2.02 
   1   9   0   37.36    1.82 
  -1  -9   0   32.91    1.78 
  -1   9   0   34.05    1.75 
  -1   9   0   36.46    1.93 
   1  -9   0   36.97    1.93 
   1   9   0   34.65    2.09 
   1  -9   0   35.66    1.96 
  -1  -9   0   34.65    1.81 
  -1  -9   0   33.80    2.01 
   2   9   0    0.58    0.92 
   2  -9   0    2.07    0.83 
  -2  -9   0    2.10    0.76 
   2   9   0    2.22    0.71 
   2   9   0    2.01    0.75 
  -2   9   0    1.84    0.96 
   2  -9   0    2.58    0.87 
  -2  -9   0    1.43    0.54 
   2  -9   0    1.29    0.88 
   2  -9   0    1.23    0.93 
  -2   9   0    2.83    0.89 
   2   9   0    1.79    0.63 
  -2  -9   0    2.63    1.03 
  -2   9   0    3.02    0.94 
  -2   9   0    2.25    1.03 
  -2  -9   0    2.36    0.97 
  -2  -9   0    0.96    0.66 
  -2  -9   0    1.42    0.69 
  -2   9   0    1.15    0.78 
   2   9   0    1.11    0.63 
  -2   9   0    1.57    0.89 
   2  -9   0    1.93    1.00 
   2  -9   0    1.89    0.78 
  -2  -9   0    1.43    0.75 
   2  -9   0    0.95    0.87 
   3   9   0   10.32    1.34 
   3  -9   0    9.45    1.21 
   3  -9   0   15.39    1.60 
   3   9   0   15.58    1.25 
  -3  -9   0   13.75    0.91 
  -3   9   0   14.09    1.80 
  -3  -9   0   12.26    1.19 
  -3   9   0   13.10    1.73 
  -3  -9   0   15.65    1.26 
   3   9   0   13.78    1.24 
   3  -9   0   13.52    1.30 
  -3   9   0   14.29    1.77 
  -3  -9   0   11.84    1.71 
   3   9   0   12.89    1.19 
   3  -9   0   11.36    1.34 
  -3   9   0   12.49    1.54 
   3  -9   0   13.08    1.75 
  -3   9   0   11.76    1.60 
  -3  -9   0   17.36    1.34 
   3  -9   0   12.24    1.69 
   3  -9   0   13.20    1.73 
  -3  -9   0   12.45    1.27 
  -3  -9   0   13.00    1.74 
   3   9   0   14.95    1.16 
  -3   9   0   13.51    1.50 
   4  -9   0    7.52    1.30 
  -4  -9   0    8.12    0.66 
  -4  -9   0    9.08    1.25 
  -4   9   0   10.37    1.42 
   4  -9   0    9.15    1.34 
   4   9   0    8.02    0.86 
   4  -9   0    8.80    1.20 
  -4  -9   0    8.25    1.02 
   4  -9   0    9.94    1.42 
  -4  -9   0    8.40    0.60 
   4   9   0    6.90    1.32 
   4   9   0    7.73    1.03 
  -4   9   0   10.44    1.35 
  -4  -9   0    7.87    1.34 
   4   9   0    9.97    1.17 
  -4   9   0    6.94    1.33 
   4  -9   0    8.81    1.44 
  -4   9   0    7.44    1.27 
  -4  -9   0   11.77    1.22 
  -4  -9   0    8.99    1.35 
   4  -9   0    6.68    1.22 
  -4   9   0    8.77    1.33 
  -4  -9   0    8.83    1.17 
   4   9   0    7.94    1.08 
   5  -9   0   40.10    1.81 
   5   9   0   42.01    1.86 
  -5   9   0   43.54    2.78 
  -5  -9   0   38.20    1.74 
   5   9   0   42.03    2.67 
  -5   9   0   42.00    2.67 
  -5  -9   0   42.65    1.87 
   5  -9   0   42.30    2.47 
  -5  -9   0   41.72    2.57 
  -5  -9   0   42.73    1.86 
  -5   9   0   38.26    2.32 
   5  -9   0   39.05    2.52 
   5  -9   0   43.08    2.42 
   5  -9   0   44.72    2.70 
  -5   9   0   41.57    2.52 
   5  -9   0   40.57    2.66 
   5   9   0   41.29    1.74 
  -5  -9   0   45.66    1.86 
   5   9   0   41.28    1.78 
  -5   9   0   39.37    2.30 
   5   9   0   40.64    2.08 
   5  -9   0   46.75    2.56 
  -5   9   0   47.99    2.60 
   6   9   0    3.25    0.79 
   6   9   0    3.51    1.35 
  -6   9   0    2.57    1.41 
   6  -9   0    1.72    1.43 
  -6   9   0    2.22    1.29 
  -6  -9   0    2.42    0.82 
  -6   9   0    0.30    1.21 
   6   9   0    2.66    0.70 
  -6  -9   0    2.42    0.80 
  -6  -9   0    3.03    0.73 
  -6  -9   0    2.58    1.27 
  -6   9   0    2.47    1.09 
  -6   9   0    3.17    1.30 
  -6   9   0    2.31    1.35 
  -6  -9   0    1.61    0.76 
   6  -9   0    2.06    1.42 
   6  -9   0    3.90    1.50 
   6  -9   0    0.83    1.28 
   6   9   0    2.02    0.80 
   6  -9   0    2.49    0.71 
   6  -9   0    1.69    1.22 
   6  -9   0    2.88    1.27 
   6   9   0    1.99    0.66 
   7   9   0   24.35    1.66 
  -7  -9   0   26.90    2.63 
  -7   9   0   23.53    2.67 
   7   9   0   24.47    2.68 
   7  -9   0   26.66    2.49 
   7   9   0   24.15    1.47 
   7  -9   0   22.58    2.82 
  -7   9   0   20.94    2.48 
  -7   9   0   26.40    2.74 
  -7  -9   0   23.91    1.65 
   7   9   0   24.66    1.49 
  -7  -9   0   25.45    1.50 
  -7   9   0   24.15    3.41 
   7  -9   0   27.54    2.56 
   7   9   0   24.45    1.78 
  -7   9   0   28.28    2.36 
  -7  -9   0   24.00    1.63 
   7  -9   0   24.71    1.36 
   7  -9   0   18.79    2.31 
   7  -9   0   23.10    2.65 
   7  -9   0   26.01    2.66 
  -7   9   0   23.94    2.32 
  -8   9   0    5.63    1.70 
  -8  -9   0   10.37    1.13 
   8   9   0    8.93    0.96 
   8  -9   0   11.84    2.05 
  -8   9   0    7.13    1.88 
   8  -9   0    9.38    1.81 
  -8  -9   0    8.39    1.01 
   8  -9   0    7.80    0.76 
   8  -9   0    7.82    1.85 
  -8  -9   0   10.22    1.12 
  -8   9   0    7.95    1.83 
  -8   9   0   11.81    2.06 
  -8   9   0    9.16    1.65 
   8  -9   0    7.26    1.93 
   8  -9   0    7.45    1.82 
   8   9   0   10.51    1.36 
   8   9   0    7.44    1.10 
   8  -9   0    9.36    1.70 
  -9  -9   0    1.13    0.94 
   9  -9   0    0.11    1.73 
   9   9   0   -1.69    1.69 
   9  -9   0   -2.60    2.10 
   9   9   0    1.55    1.03 
  -9   9   0   -3.28    1.85 
   9   9   0    1.26    0.83 
  -9   9   0    0.76    1.78 
  -9  -9   0    0.65    0.98 
   9   9   0   -0.71    0.81 
  -9   9   0    0.35    1.74 
  -9  -9   0    1.33    0.95 
  -9   9   0    0.42    1.92 
   9  -9   0    2.02    2.05 
   9  -9   0    0.98    2.25 
  -9   9   0   -0.54    1.42 
   9  -9   0   -0.11    1.94 
  -9  -9   0    0.62    0.88 
   9  -9   0    0.71    1.50 
  -9   9   0   -1.25    1.68 
  10  -9   0   13.36    2.41 
 -10  -9   0   20.39    2.07 
  10   9   0   15.03    2.30 
 -10   9   0   16.86    2.58 
 -10   9   0   15.39    2.56 
  10   9   0   16.55    1.76 
 -10   9   0   12.88    2.35 
 -10   9   0   15.80    2.72 
 -10  -9   0   13.66    1.87 
  10   9   0   14.76    2.43 
  10  -9   0   15.73    2.21 
 -10   9   0   15.32    2.12 
  10   9   0   17.15    2.07 
 -10   9   0   14.38    2.59 
  10  -9   0   14.16    2.56 
  10   9   0   15.24    1.73 
 -10  -9   0   15.98    1.82 
  11   9   0    1.54    1.40 
  11   9   0    4.83    2.34 
 -11  -9   0   -0.35    1.22 
  11  -9   0    5.45    2.50 
 -11   9   0   -1.53    2.31 
 -11  -9   0    2.64    1.39 
 -11   9   0    2.30    2.57 
  11  -9   0   -0.51    2.36 
 -11   9   0   -0.18    2.54 
 -11   9   0    0.99    2.14 
 -11   9   0   -1.29    2.25 
 -11   9   0   -1.53    2.24 
  11   9   0   -0.61    1.02 
 -11  -9   0    0.62    1.19 
 -12  -9   0    3.44    1.46 
 -12   9   0    9.52    2.86 
 -12  -9   0    8.41    1.42 
  12  -9   0    4.86    3.12 
 -12   9   0    6.49    2.79 
  12   9   0    6.02    2.74 
 -12   9   0   -0.03    2.53 
   0 -10   0   48.32    2.27 
   0 -10   0   47.63    2.39 
   0  10   0   49.97    2.42 
   0  10   0   49.19    2.29 
   0 -10   0   50.92    2.28 
   0 -10   0   50.31    2.34 
   0 -10   0   48.71    2.22 
   0 -10   0   49.30    2.52 
   0  10   0   44.09    2.19 
   0 -10   0   48.98    2.22 
   1 -10   0   46.79    2.27 
  -1  10   0   41.55    2.35 
   1 -10   0   44.83    2.42 
  -1  10   0   47.28    2.30 
  -1 -10   0   48.37    2.53 
   1 -10   0   47.46    2.27 
   1  10   0   47.79    2.13 
  -1 -10   0   42.27    2.06 
  -1 -10   0   44.71    2.08 
   1 -10   0   46.04    2.25 
  -1  10   0   39.41    2.49 
  -1  10   0   43.14    2.16 
  -1  10   0   44.10    2.28 
  -1 -10   0   44.11    2.16 
   1  10   0   41.51    2.01 
   1  10   0   46.87    2.43 
   1 -10   0   46.74    2.27 
   1 -10   0   47.15    2.38 
  -1 -10   0   43.50    1.96 
  -1  10   0   47.28    2.34 
  -1  10   0   46.10    2.33 
  -1 -10   0   41.58    2.09 
   1 -10   0   45.59    2.24 
   1  10   0   40.80    1.99 
  -2 -10   0    7.43    1.02 
  -2 -10   0   10.26    1.24 
  -2  10   0    7.52    1.94 
  -2  10   0   12.10    1.46 
  -2 -10   0    9.49    1.10 
   2  10   0   11.22    1.25 
  -2  10   0    8.42    1.20 
  -2 -10   0   13.40    1.84 
  -2 -10   0    9.92    1.29 
  -2 -10   0   10.70    1.46 
  -2  10   0   10.09    1.36 
   2  10   0   10.00    1.25 
   2  10   0    8.75    1.13 
  -2  10   0   11.81    1.37 
  -2  10   0    8.25    1.18 
  -2 -10   0    9.36    1.07 
   2 -10   0    8.11    1.25 
   2 -10   0    8.58    1.10 
   2  10   0    8.50    1.30 
   2 -10   0   10.89    1.33 
   2 -10   0    9.21    1.34 
   2 -10   0    6.86    1.15 
   2 -10   0    7.29    1.29 
   2 -10   0    9.32    1.28 
   3  10   0   84.41    2.84 
  -3  10   0   81.75    3.37 
  -3  10   0   77.33    3.07 
  -3 -10   0   76.42    2.84 
   3  10   0   77.81    2.76 
  -3  10   0   82.27    3.44 
   3 -10   0   77.77    3.33 
  -3 -10   0   82.10    3.32 
   3 -10   0   79.77    3.32 
  -3 -10   0   80.88    2.83 
  -3  10   0   77.01    3.15 
   3 -10   0   80.29    3.27 
  -3 -10   0   82.29    3.43 
  -3  10   0   83.05    3.34 
   3 -10   0   80.67    3.33 
   3 -10   0   82.19    3.28 
   3 -10   0   77.39    2.87 
  -3 -10   0   78.96    2.79 
   3 -10   0   77.55    3.25 
   3  10   0   75.47    2.70 
   3  10   0   83.57    3.38 
  -3 -10   0   77.21    2.41 
  -3 -10   0   78.42    2.79 
  -3  10   0   66.89    4.46 
   4  10   0   16.10    2.13 
   4 -10   0   17.76    2.04 
  -4  10   0   12.29    1.85 
  -4 -10   0   19.08    1.42 
   4  10   0   18.76    1.60 
  -4 -10   0   17.76    1.52 
  -4 -10   0   16.19    1.77 
  -4  10   0   12.26    1.67 
  -4 -10   0   14.66    0.83 
  -4  10   0   18.49    2.07 
   4  10   0   16.15    1.32 
   4 -10   0   19.35    1.91 
   4 -10   0   13.38    1.46 
  -4  10   0   13.03    1.62 
  -4 -10   0   17.84    2.16 
   4  10   0   16.85    1.35 
   4 -10   0   18.89    2.16 
  -4 -10   0   15.67    1.44 
  -4 -10   0   15.30    1.35 
  -4  10   0   17.21    2.12 
   4 -10   0   18.36    2.12 
   4 -10   0   16.51    2.06 
   4  10   0   14.36    1.39 
   4 -10   0   14.07    1.93 
  -4  10   0   17.24    1.83 
   5 -10   0   68.79    3.51 
  -5  10   0   64.17    3.06 
   5 -10   0   73.04    3.42 
   5  10   0   68.22    2.56 
   5  10   0   69.11    3.38 
   5 -10   0   67.94    3.29 
   5 -10   0   67.86    3.35 
  -5  10   0   74.80    3.46 
  -5  10   0   67.57    3.25 
   5  10   0   63.97    2.40 
  -5  10   0   69.47    3.42 
  -5 -10   0   67.57    2.49 
   5 -10   0   64.99    3.28 
  -5 -10   0   69.22    2.59 
   5 -10   0   67.01    3.34 
   5 -10   0   68.28    2.54 
  -5 -10   0   67.37    3.40 
   5  10   0   71.31    2.49 
  -5 -10   0   68.51    3.33 
   5  10   0   65.00    2.49 
  -5 -10   0   70.88    2.61 
  -5  10   0   68.51    3.46 
  -5  10   0   65.67    3.21 
  -5 -10   0   67.86    2.47 
   6 -10   0    0.33    1.25 
  -6  10   0    0.89    1.47 
  -6  10   0   -0.52    1.26 
  -6  10   0   -0.13    1.46 
   6  10   0   -0.37    0.77 
   6 -10   0    0.06    1.42 
  -6  10   0    0.08    1.34 
   6 -10   0   -0.22    1.50 
   6  10   0    0.47    0.68 
  -6  10   0    0.63    1.25 
  -6 -10   0    0.09    0.70 
   6 -10   0   -0.10    1.37 
  -6  10   0   -0.66    1.12 
   6  10   0   -0.11    0.76 
  -6 -10   0    1.05    1.38 
   6  10   0   -0.95    1.40 
   6  10   0    0.65    0.67 
  -6 -10   0    1.73    0.83 
  -6 -10   0    0.77    0.81 
   6 -10   0    0.80    0.77 
   6 -10   0    1.17    1.40 
   6 -10   0   -0.85    1.49 
  -7 -10   0    2.09    0.81 
   7 -10   0    3.16    1.68 
  -7 -10   0    2.19    0.87 
   7  10   0    2.81    1.12 
  -7  10   0    2.37    1.72 
   7 -10   0    3.69    1.63 
  -7 -10   0    1.53    1.63 
   7  10   0    2.76    0.91 
   7 -10   0    4.05    1.47 
  -7  10   0    7.42    2.20 
  -7 -10   0    2.52    0.91 
  -7  10   0    1.84    1.47 
  -7 -10   0    2.11    1.55 
  -7  10   0    2.41    1.64 
   7 -10   0    1.00    1.76 
   7  10   0    3.20    0.79 
   7 -10   0    1.01    1.52 
  -7  10   0    2.13    1.49 
   7 -10   0    2.72    0.77 
   7 -10   0    1.65    1.55 
   7  10   0    2.26    0.78 
  -7  10   0    1.11    1.31 
   8 -10   0    1.06    0.70 
  -8 -10   0    0.59    0.81 
   8 -10   0    2.55    1.79 
   8  10   0    0.33    0.79 
  -8  10   0    0.93    1.76 
   8  10   0    0.16    1.66 
  -8  10   0    3.35    1.67 
   8  10   0    3.70    0.99 
  -8  10   0    0.25    1.62 
  -8  10   0    2.12    1.76 
  -8  10   0    2.30    1.48 
   8 -10   0    0.98    1.83 
  -8 -10   0    1.57    0.93 
   8 -10   0    2.12    1.86 
   8  10   0    1.63    0.79 
   8 -10   0    2.51    1.51 
  -8 -10   0    1.80    0.94 
   8 -10   0    5.62    1.69 
  -8 -10   0    1.33    0.93 
  -8  10   0    0.93    1.76 
  -9  10   0   60.37    3.69 
   9  10   0   61.65    2.44 
   9 -10   0   63.95    4.28 
  -9  10   0   58.39    4.04 
  -9 -10   0   60.67    3.07 
  -9  10   0   67.01    4.53 
   9 -10   0   66.77    4.14 
  -9 -10   0   62.11    2.68 
   9  10   0   64.70    2.75 
   9  10   0   62.95    4.03 
  -9 -10   0   67.16    2.76 
  -9 -10   0   66.23    2.58 
  -9  10   0   68.29    4.24 
   9 -10   0   68.88    3.88 
  -9  10   0   68.96    4.17 
  -9  10   0   67.13    3.93 
   9  10   0   58.34    3.05 
   9 -10   0   68.36    4.46 
 -10 -10   0   13.63    1.55 
 -10  10   0   15.33    2.46 
 -10  10   0   13.38    2.47 
 -10  10   0   12.20    2.63 
  10  10   0   11.21    1.51 
  10  10   0   17.46    2.70 
  10  10   0   14.95    1.84 
 -10  10   0   11.85    2.25 
  10 -10   0   13.60    2.27 
  10 -10   0   14.20    2.73 
 -10  10   0   11.12    2.75 
  10  10   0   13.54    1.61 
 -10  10   0   15.62    2.67 
 -10 -10   0   12.03    1.44 
 -10 -10   0   13.48    1.38 
  11 -10   0   11.32    2.86 
  11 -10   0    5.29    2.28 
 -11 -10   0    6.35    1.39 
  11  10   0    6.56    2.54 
  11  10   0    9.85    1.62 
 -11  10   0    7.94    2.79 
  11 -10   0    9.64    2.71 
 -11  10   0    2.83    2.42 
 -11 -10   0    9.15    1.59 
 -11  10   0    8.15    2.59 
 -11  10   0   13.12    2.73 
 -12 -10   0    1.39    1.25 
 -12 -10   0   -2.21    1.33 
  12  10   0   -3.12    2.74 
  12 -10   0   -1.18    3.05 
 -12  10   0    1.69    3.41 
 -12  10   0    0.81    2.83 
   0 -11   0   -0.64    0.96 
   0  11   0   -0.04    1.00 
   0 -11   0    0.21    0.81 
   0 -11   0   -0.13    0.90 
   0 -11   0    0.02    1.02 
   0  11   0    0.26    0.91 
   0 -11   0    0.08    1.03 
   0 -11   0    0.90    0.95 
   0  11   0    1.13    1.00 
   0 -11   0   -0.24    0.78 
   0  11   0    0.60    0.82 
   0  11   0   -0.31    0.86 
   1 -11   0   27.89    2.00 
  -1 -11   0   25.21    2.14 
   1 -11   0   24.82    1.96 
  -1  11   0   28.89    2.10 
  -1 -11   0   26.31    1.77 
  -1  11   0   24.79    1.98 
  -1  11   0   26.96    2.08 
   1 -11   0   28.00    2.09 
   1  11   0   28.09    1.94 
   1  11   0   24.71    1.77 
  -1 -11   0   27.16    1.85 
  -1 -11   0   28.40    2.31 
  -1  11   0   29.31    2.08 
  -1 -11   0   25.11    1.91 
   1  11   0   23.21    1.75 
  -1  11   0   26.04    1.90 
   1 -11   0   25.63    1.95 
   1  11   0   28.17    1.79 
  -1  11   0   26.67    1.77 
  -1 -11   0   26.03    1.84 
   1  11   0   29.65    2.24 
  -1 -11   0   26.25    1.69 
   1 -11   0   24.76    2.20 
   1 -11   0   27.89    2.03 
  -2 -11   0   -0.84    0.73 
   2  11   0   -0.73    1.10 
  -2 -11   0   -0.05    0.86 
   2  11   0   -0.35    0.71 
   2 -11   0   -0.07    1.01 
   2 -11   0   -0.15    0.91 
   2 -11   0    1.16    1.18 
   2  11   0   -0.42    0.86 
  -2 -11   0    0.80    1.08 
  -2  11   0    0.99    0.95 
  -2  11   0   -0.05    1.06 
   2  11   0   -0.21    1.09 
  -2 -11   0    1.71    0.90 
   2  11   0   -0.36    0.76 
  -2  11   0    0.29    0.87 
  -2 -11   0   -1.00    1.07 
   2 -11   0   -0.96    1.05 
   2 -11   0    0.45    1.04 
  -2  11   0    0.07    1.15 
   2 -11   0    0.80    1.13 
  -2 -11   0   -0.87    0.76 
  -2 -11   0   -0.04    0.62 
  -2  11   0    0.51    1.05 
  -2  11   0   -0.02    0.99 
   2 -11   0    0.78    0.96 
   3 -11   0   56.83    2.89 
  -3 -11   0   54.04    2.31 
  -3  11   0   53.05    2.72 
   3 -11   0   60.66    2.78 
  -3  11   0   55.66    2.81 
  -3  11   0   58.57    2.98 
   3  11   0   49.43    2.28 
  -3 -11   0   51.22    2.30 
  -3  11   0   53.23    2.71 
   3 -11   0   51.32    2.89 
  -3 -11   0   50.93    2.87 
  -3  11   0   51.78    2.73 
   3 -11   0   53.60    2.87 
  -3 -11   0   55.32    2.42 
  -3  11   0   56.05    2.90 
   3  11   0   54.73    2.95 
  -3 -11   0   49.61    2.36 
   3  11   0   47.82    2.19 
   3 -11   0   54.34    2.82 
  -3 -11   0   52.88    1.93 
   3  11   0   52.33    2.33 
   3 -11   0   52.32    2.46 
   3  11   0   55.96    2.34 
  -3 -11   0   54.04    2.99 
  -4 -11   0    1.34    1.33 
  -4  11   0    3.45    1.30 
   4  11   0    2.83    0.92 
  -4  11   0    0.99    1.06 
   4 -11   0    3.46    1.25 
   4  11   0    2.33    0.77 
   4 -11   0    0.34    1.19 
  -4  11   0    2.07    1.31 
  -4  11   0    3.44    1.20 
  -4  11   0    3.07    1.47 
  -4 -11   0    2.45    0.96 
   4  11   0    2.81    0.82 
   4 -11   0    2.98    0.96 
  -4 -11   0    2.80    0.85 
   4  11   0    3.79    1.37 
   4 -11   0    3.21    1.40 
  -4  11   0    3.89    1.44 
  -4 -11   0    2.51    0.49 
  -4 -11   0    2.03    0.97 
  -4 -11   0    1.87    0.89 
  -4 -11   0    4.29    1.32 
   4  11   0    3.05    0.94 
   4 -11   0    2.20    1.32 
   4 -11   0    3.44    1.27 
   4 -11   0    3.57    1.39 
   5  11   0    4.63    1.64 
   5  11   0    6.20    0.91 
  -5 -11   0    6.72    1.71 
  -5  11   0    5.92    1.57 
   5 -11   0    5.64    1.62 
   5  11   0    6.52    0.97 
  -5  11   0    6.04    1.67 
  -5  11   0    6.16    1.45 
  -5 -11   0    7.52    1.08 
   5 -11   0    9.20    1.65 
   5  11   0    6.29    1.05 
   5 -11   0    6.03    1.45 
   5 -11   0    4.38    1.59 
  -5 -11   0    7.95    1.08 
  -5 -11   0    7.58    1.12 
   5  11   0    6.18    1.56 
  -5  11   0    6.95    1.44 
  -5  11   0    5.60    1.64 
  -5 -11   0    5.72    0.96 
   5 -11   0    5.80    1.01 
  -5 -11   0    6.63    1.65 
  -5  11   0    6.52    1.44 
   5 -11   0    7.98    1.74 
  -6  11   0   -0.90    1.47 
  -6  11   0    3.58    1.68 
   6  11   0    1.24    0.90 
   6  11   0    0.98    0.85 
  -6 -11   0    3.86    2.57 
   6 -11   0    2.02    1.48 
   6  11   0    2.07    0.80 
  -6 -11   0    3.91    0.96 
   6 -11   0   -0.07    1.47 
   6  11   0    1.43    2.23 
   6 -11   0    0.26    1.50 
  -6 -11   0    1.76    0.82 
   6 -11   0    1.92    1.62 
  -6 -11   0    2.57    1.61 
  -6  11   0    3.29    1.52 
  -6  11   0    1.49    1.69 
   6  11   0    0.67    0.80 
  -6  11   0    1.52    1.69 
   6 -11   0    0.30    1.64 
   6 -11   0    2.88    1.45 
  -6 -11   0    1.57    1.04 
   6 -11   0    1.05    0.86 
  -6 -11   0    2.47    0.96 
  -6  11   0    2.10    1.39 
   7 -11   0   22.62    2.62 
  -7 -11   0   28.68    1.76 
   7 -11   0   23.73    2.65 
   7 -11   0   25.55    3.26 
  -7 -11   0   30.28    1.88 
  -7 -11   0   25.29    1.65 
   7  11   0   23.98    2.13 
   7  11   0   26.91    1.86 
   7  11   0   22.58    3.00 
   7 -11   0   23.70    2.57 
   7 -11   0   21.45    3.02 
   7  11   0   24.23    1.59 
  -7  11   0   28.28    3.23 
   7  11   0   26.87    1.70 
  -7  11   0   22.64    2.97 
   7 -11   0   27.34    2.86 
  -7 -11   0   22.65    2.99 
  -7  11   0   26.74    2.98 
  -7  11   0   33.91    3.02 
   7 -11   0   22.93    1.68 
  -7  11   0   25.84    2.64 
  -7  11   0   24.03    2.97 
  -8  11   0    3.36    1.87 
   8  11   0    3.32    0.91 
  -8  11   0    2.48    2.01 
  -8  11   0    5.24    1.64 
   8 -11   0    5.69    2.04 
  -8  11   0    2.94    1.90 
  -8  11   0    0.91    1.76 
   8 -11   0    4.84    0.86 
  -8 -11   0    4.54    1.03 
   8  11   0   -0.14    1.90 
   8  11   0    5.83    1.11 
   8 -11   0    5.52    2.18 
  -8 -11   0    4.03    0.99 
   8  11   0    4.38    0.91 
   8 -11   0    4.93    2.05 
  -8 -11   0    5.58    1.08 
   8 -11   0    8.34    2.06 
  -9  11   0    8.77    2.41 
  -9  11   0    6.37    2.63 
   9  11   0   12.20    2.40 
  -9  11   0    8.58    2.04 
   9 -11   0    9.61    2.15 
  -9 -11   0   11.71    1.35 
   9  11   0    9.83    1.14 
  -9  11   0   12.02    2.57 
  -9 -11   0   10.56    1.27 
   9  11   0   10.74    1.38 
  -9  11   0   14.31    2.60 
   9 -11   0   15.73    2.59 
  -9 -11   0   11.84    1.37 
   9  11   0   13.10    1.65 
  -9  11   0    7.31    2.23 
   9 -11   0   10.69    2.56 
   9  11   0   10.66    1.48 
   9 -11   0   15.31    2.45 
 -10  11   0   13.84    2.80 
  10  11   0   13.99    2.76 
 -10  11   0    8.12    2.63 
 -10 -11   0   15.75    1.61 
  10 -11   0   18.93    2.92 
 -10 -11   0   14.31    1.88 
 -10  11   0   16.66    2.70 
 -10 -11   0   20.19    2.06 
  10  11   0   12.84    1.50 
 -10 -11   0   15.31    1.72 
  10 -11   0   17.74    2.81 
 -10  11   0   11.56    2.58 
  10  11   0   11.85    1.54 
  10 -11   0   15.07    2.45 
 -10  11   0    9.12    2.38 
  11  11   0   12.47    2.80 
 -11  11   0   13.36    2.84 
 -11 -11   0   10.93    1.54 
  11 -11   0   11.93    2.91 
  11 -11   0   13.38    2.72 
 -11  11   0   13.16    2.96 
 -11 -11   0   10.85    1.73 
  11 -11   0   14.03    3.13 
 -11  11   0   10.77    2.96 
   0 -12   0    0.19    0.92 
   0 -12   0    1.16    0.99 
   0  12   0    0.13    1.14 
   0 -12   0   -0.83    0.94 
   0  12   0   -1.96    0.97 
   0  12   0   -0.86    0.87 
   0 -12   0   -1.30    1.06 
   0  12   0   -0.74    1.06 
   0 -12   0   -1.66    1.06 
   0  12   0    0.21    0.95 
   0 -12   0    2.19    1.24 
   0 -12   0    1.15    1.14 
   1 -12   0  133.70    4.55 
   1 -12   0  133.17    4.55 
  -1  12   0  137.15    4.66 
   1 -12   0  136.70    4.86 
   1  12   0  136.28    4.73 
   1  12   0  131.97    4.36 
  -1 -12   0  130.11    4.38 
   1  12   0  134.99    4.41 
  -1  12   0  126.45    4.44 
  -1 -12   0  128.88    4.38 
   1 -12   0  135.33    4.56 
  -1 -12   0  138.82    4.84 
  -1  12   0  129.28    4.68 
  -1  12   0  126.50    4.42 
   1  12   0  132.27    4.30 
   1  12   0  128.05    4.31 
  -1 -12   0  136.34    4.38 
   1 -12   0  134.16    4.53 
  -1  12   0  132.68    4.51 
  -1  12   0  137.70    4.58 
  -1 -12   0  135.65    4.43 
   1 -12   0  133.84    4.57 
   1 -12   0  114.08    5.56 
  -1 -12   0  133.62    4.66 
  -1 -12   0  130.56    4.18 
   2  12   0    4.93    1.15 
  -2  12   0    7.01    1.49 
  -2 -12   0    3.98    1.36 
  -2 -12   0    5.29    1.07 
   2 -12   0    6.94    1.44 
   2 -12   0    7.13    1.25 
  -2  12   0    6.91    1.41 
  -2 -12   0    5.28    1.48 
  -2  12   0    5.41    1.30 
   2 -12   0    6.52    1.47 
   2 -12   0    3.98    1.25 
  -2  12   0    5.01    1.31 
   2 -12   0    5.76    1.25 
   2 -12   0    7.27    1.37 
   2  12   0    6.48    1.05 
  -2 -12   0    5.91    1.10 
  -2  12   0    7.04    1.35 
  -2 -12   0    5.68    0.91 
  -2 -12   0    7.47    1.22 
  -2 -12   0    9.32    1.26 
  -2  12   0    5.46    1.35 
   2 -12   0    7.06    1.55 
   2  12   0    5.45    1.11 
   2  12   0    8.70    1.58 
  -3 -12   0   34.36    2.60 
   3  12   0   33.11    1.96 
  -3 -12   0   31.07    2.08 
   3 -12   0   34.01    2.60 
   3 -12   0   35.33    2.62 
  -3 -12   0   36.17    2.05 
  -3 -12   0   29.04    1.57 
   3 -12   0   31.88    2.50 
   3  12   0   33.01    2.06 
  -3  12   0   34.74    2.69 
  -3  12   0   29.29    2.31 
  -3  12   0   30.46    2.40 
  -3 -12   0   31.12    2.66 
  -3 -12   0   32.14    2.11 
   3  12   0   31.95    1.91 
  -3  12   0   30.78    2.36 
  -3 -12   0   31.95    1.98 
   3  12   0   30.65    2.01 
  -3  12   0   32.81    2.60 
   3  12   0   34.98    2.75 
   3 -12   0   32.66    2.65 
   3 -12   0   32.29    2.62 
  -3  12   0   32.81    2.42 
   3 -12   0   31.42    2.62 
   4 -12   0   24.63    2.50 
  -4 -12   0   22.72    2.04 
  -4 -12   0   22.30    2.61 
   4  12   0   21.78    1.65 
   4 -12   0   21.68    2.53 
  -4  12   0   23.11    2.19 
   4 -12   0   23.08    2.51 
  -4 -12   0   18.64    1.73 
   4 -12   0   25.53    2.65 
  -4 -12   0   21.79    1.16 
   4  12   0   24.98    1.83 
   4  12   0   23.68    2.67 
  -4  12   0   31.30    2.47 
  -4  12   0   23.42    2.64 
   4 -12   0   30.49    2.67 
   4  12   0   25.33    1.85 
  -4  12   0   23.45    2.71 
   4 -12   0   21.77    2.47 
  -4  12   0   20.59    2.40 
   4 -12   0   19.94    1.97 
  -4  12   0   21.81    2.31 
  -4 -12   0   25.08    2.50 
  -4 -12   0   26.12    1.94 
   4  12   0   22.64    1.75 
  -4 -12   0   22.70    1.86 
  -5  12   0   33.20    4.23 
  -5 -12   0   26.27    4.33 
   5 -12   0   33.35    2.90 
  -5  12   0   30.67    2.64 
  -5 -12   0   36.00    2.04 
   5 -12   0   34.33    2.97 
   5 -12   0   35.11    2.97 
  -5  12   0   35.07    2.81 
   5 -12   0   28.40    3.08 
  -5 -12   0   35.73    2.97 
   5 -12   0   34.29    4.69 
  -5  12   0   30.29    2.78 
   5 -12   0   30.04    2.85 
   5 -12   0   30.49    2.12 
   5  12   0   33.62    1.95 
   5  12   0   31.32    2.05 
  -5  12   0   29.93    2.96 
   5  12   0   31.11    1.81 
   5  12   0   34.07    2.32 
  -5 -12   0   26.14    1.86 
  -5  12   0   34.98    3.00 
  -5 -12   0   36.72    2.15 
   5  12   0   34.62    3.04 
  -6  12   0    2.17    1.64 
  -6  12   0    3.45    1.69 
   6 -12   0    0.15    1.71 
  -6  12   0    2.07    1.74 
   6  12   0   -0.70    0.97 
   6  12   0   -0.12    0.80 
   6  12   0    0.11    0.92 
   6 -12   0    0.07    1.65 
  -6 -12   0    1.10    0.96 
   6  12   0    2.12    1.66 
   6 -12   0   -0.16    1.57 
  -6 -12   0    0.95    0.97 
   6 -12   0   -1.44    1.57 
  -6 -12   0   -0.39    1.63 
  -6 -12   0    0.51    0.84 
  -6 -12   0    0.25    1.56 
  -6  12   0    0.72    1.43 
  -6  12   0   -0.28    2.06 
  -6  12   0    4.07    1.64 
   6  12   0    0.83    0.86 
  -6 -12   0    1.60    0.97 
   6 -12   0   -0.41    0.95 
   6 -12   0    0.94    1.76 
   6 -12   0    1.33    1.49 
  -7 -12   0   21.22    1.75 
   7  12   0   18.93    1.92 
   7 -12   0   18.83    2.47 
   7 -12   0   15.84    3.37 
   7 -12   0   18.67    2.52 
  -7  12   0   16.77    2.05 
   7 -12   0   18.50    2.37 
   7  12   0   18.49    2.16 
  -7 -12   0   18.95    2.46 
   7 -12   0   17.75    1.71 
  -7 -12   0   17.78    1.59 
  -7  12   0   22.54    3.16 
  -7  12   0   23.57    3.18 
  -7  12   0   17.44    2.28 
   7  12   0   22.30    2.55 
   7 -12   0   24.10    3.13 
   7 -12   0   17.45    2.32 
  -7 -12   0   18.35    1.87 
  -7  12   0   19.27    2.59 
   7  12   0   19.45    1.57 
   7  12   0   20.41    1.67 
  -7 -12   0   15.31    2.24 
  -7 -12   0   22.91    1.87 
  -7  12   0   17.10    2.36 
   8  12   0    5.58    2.10 
   8 -12   0    5.32    1.00 
  -8  12   0    3.77    2.15 
  -8  12   0    6.84    2.30 
   8  12   0    2.38    1.20 
   8 -12   0    8.07    1.96 
   8 -12   0    3.96    1.98 
  -8 -12   0    6.97    1.23 
  -8 -12   0    5.22    2.17 
  -8 -12   0    5.72    1.15 
   8  12   0    7.70    1.67 
  -8  12   0    3.45    2.00 
  -8 -12   0    5.66    1.21 
   8 -12   0    5.72    2.27 
  -8  12   0    6.17    2.39 
  -8 -12   0    6.94    1.19 
  -8  12   0    6.55    1.88 
   8 -12   0    7.87    2.12 
   8  12   0    4.91    1.01 
  -8  12   0    4.27    2.27 
  -9 -12   0    3.24    1.20 
  -9  12   0   -0.74    2.29 
   9  12   0    1.94    1.13 
  -9  12   0    2.23    2.24 
   9 -12   0    5.03    2.55 
   9  12   0    1.81    2.32 
  -9 -12   0    3.43    1.07 
   9  12   0    0.98    1.22 
   9 -12   0    6.60    3.05 
   9 -12   0    2.91    2.15 
  -9 -12   0    3.34    1.03 
  -9  12   0   -1.54    2.32 
  -9  12   0    2.21    2.47 
  -9 -12   0    2.95    1.23 
   9  12   0    3.10    0.92 
   9 -12   0   -0.57    2.31 
  -9  12   0    1.10    2.01 
 -10  12   0   -0.59    2.49 
  10  12   0    3.25    1.41 
  10 -12   0    8.84    2.86 
  10 -12   0    6.82    2.90 
 -10 -12   0    4.66    1.36 
  10 -12   0    4.16    2.33 
 -10  12   0    2.83    2.60 
  10  12   0    4.71    2.47 
 -10  12   0    9.24    2.79 
 -10  12   0    4.66    2.63 
 -11  12   0   27.93    3.80 
  11  12   0   25.19    3.43 
  11 -12   0   31.30    3.94 
  11 -12   0   33.46    4.51 
 -11  12   0   27.12    4.17 
  11 -12   0   32.52    5.25 
 -11  12   0   29.97    4.50 
   0  13   0    1.02    1.29 
   0  13   0   -1.40    1.07 
   0 -13   0   -0.32    1.18 
   0  13   0    1.35    1.00 
   0  13   0   -0.06    1.21 
   0 -13   0    0.31    1.11 
   0 -13   0    0.71    1.03 
   0  13   0   -0.66    1.06 
   0 -13   0   -1.60    0.96 
   0 -13   0    0.16    1.21 
   0 -13   0   -1.32    1.05 
   0 -13   0   -0.81    1.32 
  -1 -13   0    0.52    1.15 
   1  13   0    0.20    1.02 
  -1 -13   0   -1.24    0.94 
   1  13   0    0.04    0.98 
   1 -13   0    0.75    1.18 
  -1 -13   0    0.90    0.90 
  -1  13   0    1.35    1.18 
   1 -13   0   -0.45    1.20 
   1  13   0    1.02    1.18 
   1 -13   0    0.69    1.35 
  -1 -13   0    2.58    1.36 
  -1 -13   0    2.00    1.07 
  -1  13   0    1.02    1.10 
   1  13   0    0.64    0.94 
   1 -13   0   -1.02    1.24 
   1 -13   0    1.36    1.19 
   1 -13   0   -2.17    1.16 
  -1 -13   0   -0.30    1.37 
  -1 -13   0    0.05    1.13 
  -1  13   0    1.15    1.29 
  -1  13   0    0.25    1.11 
   1 -13   0   -0.25    1.12 
   1  13   0    3.34    1.45 
   2  13   0    2.92    1.10 
  -2  13   0   -0.30    1.20 
  -2 -13   0   -0.62    1.06 
  -2  13   0    0.59    1.30 
  -2 -13   0    0.28    0.81 
   2 -13   0    0.60    1.34 
   2 -13   0    0.18    1.45 
   2  13   0    1.44    1.39 
  -2 -13   0   -1.14    1.32 
   2 -13   0    0.72    1.19 
  -2  13   0    0.79    1.24 
   2  13   0    1.91    1.12 
   2 -13   0    1.60    1.20 
  -2 -13   0    1.04    1.05 
  -2  13   0    0.08    1.21 
   2 -13   0   -0.83    1.35 
   2 -13   0   -1.30    1.30 
  -2 -13   0    0.11    1.06 
  -2  13   0    0.40    1.17 
  -2 -13   0    0.24    1.26 
  -2 -13   0   -0.46    0.93 
   2 -13   0    1.30    1.20 
   2  13   0    0.05    0.92 
  -3 -13   0   78.82    6.06 
  -3  13   0   90.33    3.86 
  -3 -13   0   85.48    2.90 
   3 -13   0   94.02    3.87 
   3  13   0   86.02    3.39 
  -3 -13   0   92.25    4.08 
   3 -13   0   88.38    5.65 
   3 -13   0   88.29    4.05 
  -3  13   0   91.11    4.02 
  -3 -13   0   89.64    3.43 
  -3  13   0   92.39    4.04 
  -3 -13   0   94.90    3.38 
  -3  13   0   83.41    3.64 
   3 -13   0   86.01    3.56 
   3  13   0   86.65    3.26 
  -3  13   0   83.12    3.81 
   3  13   0   85.32    3.32 
   3  13   0   85.17    3.38 
  -3 -13   0   87.27    3.46 
  -3 -13   0   81.77    4.04 
   3 -13   0   89.05    4.01 
  -3  13   0   85.92    3.86 
   3 -13   0   86.41    3.91 
   3  13   0   79.77    4.90 
   3 -13   0   89.22    4.14 
  -4 -13   0   24.78    2.74 
  -4 -13   0   19.49    2.19 
  -4 -13   0   23.91    1.96 
  -4 -13   0   21.00    1.96 
  -4 -13   0   19.18    1.21 
  -4  13   0   23.05    2.90 
  -4 -13   0   18.31    1.87 
  -4  13   0   20.54    2.50 
   4  13   0   17.65    1.82 
   4  13   0   24.81    2.81 
   4 -13   0   22.41    2.84 
   4 -13   0   20.97    2.26 
  -4  13   0   23.02    2.46 
   4 -13   0   19.69    2.68 
   4  13   0   24.63    1.99 
   4  13   0   17.09    1.73 
   4 -13   0   19.47    2.39 
   4 -13   0   22.72    2.75 
  -4  13   0   25.68    2.79 
  -4  13   0   20.08    2.45 
   4 -13   0   18.14    2.14 
   4  13   0   19.50    1.98 
  -4  13   0   18.49    2.51 
   4 -13   0   21.32    2.67 
  -4 -13   0   21.58    2.43 
  -5  13   0    5.23    1.90 
   5 -13   0    9.18    2.02 
  -5  13   0    5.51    1.55 
  -5 -13   0    9.73    1.37 
   5 -13   0    5.75    1.91 
  -5 -13   0    9.76    1.30 
   5  13   0    7.90    1.11 
   5 -13   0    7.57    2.26 
   5  13   0    7.42    1.29 
  -5 -13   0    8.63    1.31 
   5  13   0    8.71    1.24 
  -5 -13   0   10.69    2.00 
   5 -13   0    9.27    2.05 
   5  13   0    8.28    1.34 
   5 -13   0    6.15    1.71 
  -5 -13   0    9.18    2.02 
  -5  13   0   10.62    2.07 
  -5  13   0    5.19    1.79 
  -5  13   0    7.31    1.72 
   5  13   0    9.73    1.91 
  -5  13   0   11.01    2.05 
  -5 -13   0    9.57    1.24 
   5 -13   0    6.80    1.78 
   5 -13   0    9.00    2.08 
  -6  13   0    4.06    1.96 
   6  13   0    1.08    1.11 
  -6  13   0    4.70    2.01 
   6 -13   0    3.40    2.00 
  -6 -13   0    2.31    1.14 
   6 -13   0    1.69    1.83 
   6 -13   0    3.48    1.85 
  -6  13   0    3.22    1.86 
   6 -13   0   -1.26    1.82 
  -6 -13   0    0.87    0.94 
   6  13   0    1.88    1.85 
  -6  13   0    3.57    1.91 
   6  13   0    3.29    1.02 
  -6 -13   0    3.14    1.09 
  -6 -13   0    3.44    1.15 
   6  13   0    0.39    1.04 
  -6  13   0    4.04    1.80 
  -6 -13   0    4.40    1.93 
  -6  13   0    2.41    1.54 
  -6 -13   0    3.08    1.83 
   6 -13   0   -0.05    1.67 
   6 -13   0    2.78    1.14 
   6 -13   0    1.74    1.61 
   6  13   0    2.33    0.96 
  -7 -13   0   11.48    1.30 
  -7  13   0    7.46    1.88 
  -7  13   0   10.42    2.40 
  -7 -13   0    8.62    1.21 
   7 -13   0    7.89    2.27 
   7  13   0   10.99    2.38 
   7 -13   0   10.11    1.31 
   7  13   0    7.08    1.41 
  -7  13   0    9.51    2.32 
  -7 -13   0    9.12    2.31 
   7 -13   0   11.42    2.29 
  -7  13   0    9.17    2.08 
   7 -13   0   10.37    2.10 
  -7 -13   0    9.49    1.34 
   7  13   0   10.48    1.23 
   7  13   0    8.56    1.13 
   7  13   0    7.78    1.34 
   7 -13   0    9.57    2.49 
   7 -13   0   11.84    2.31 
  -7 -13   0    9.68    1.34 
  -7  13   0   10.91    2.40 
  -7  13   0    6.82    2.15 
  -8 -13   0   15.99    1.88 
   8 -13   0   13.90    2.38 
  -8  13   0   15.42    2.86 
   8 -13   0   19.76    2.84 
   8 -13   0   14.97    2.73 
  -8 -13   0   19.26    2.83 
   8 -13   0   16.64    2.78 
  -8  13   0   23.98    3.26 
   8  13   0   17.58    2.74 
   8  13   0   13.32    1.66 
   8  13   0   15.30    1.95 
   8  13   0   15.71    2.12 
  -8 -13   0   15.04    1.57 
  -8  13   0   17.29    2.52 
  -8  13   0   11.41    2.52 
  -8 -13   0   14.00    1.97 
   8 -13   0   12.84    1.77 
  -8  13   0   13.09    2.49 
  -9 -13   0   13.21    1.50 
  -9 -13   0   10.86    1.49 
   9  13   0   10.23    2.81 
  -9  13   0    3.16    2.40 
  -9  13   0    7.86    2.75 
  -9  13   0    2.72    2.48 
  -9 -13   0    4.18    2.51 
   9  13   0    8.77    1.49 
   9 -13   0   12.23    2.67 
  -9  13   0    6.40    2.78 
   9 -13   0   13.88    3.03 
   9  13   0    9.30    1.06 
  10 -13   0   11.98    3.30 
 -10 -13   0    7.64    2.87 
 -10 -13   0    9.60    1.52 
 -10 -13   0    6.79    1.53 
  10 -13   0    3.94    2.80 
 -10  13   0   14.11    3.37 
  10 -13   0    8.43    2.73 
 -10  13   0    1.25    2.76 
  10  13   0    1.91    2.61 
 -10  13   0    9.84    3.15 
   0  14   0   -0.09    1.06 
   0 -14   0   -1.22    1.05 
   0  14   0    0.71    1.37 
   0 -14   0   -0.06    1.09 
   0  14   0    0.70    1.24 
   0 -14   0    0.26    1.21 
   0  14   0   -1.05    1.42 
   0 -14   0    0.64    1.40 
  -1  14   0   33.22    2.52 
   1  14   0   33.78    2.49 
  -1 -14   0   31.40    2.26 
  -1 -14   0   38.18    2.51 
  -1 -14   0   34.23    2.57 
  -1  14   0   35.03    2.75 
  -1 -14   0   32.52    3.01 
  -1 -14   0   36.34    2.55 
   1  14   0   36.80    2.52 
   1  14   0   34.08    2.93 
  -1 -14   0   33.77    2.87 
   1 -14   0   33.91    2.66 
  -1  14   0   34.83    2.56 
   1  14   0   29.12    2.38 
   1 -14   0   25.89    3.55 
  -1 -14   0   37.09    2.44 
   1 -14   0   30.36    2.68 
   1  14   0   34.24    2.33 
  -1  14   0   36.88    2.78 
   1 -14   0   31.20    2.59 
   1 -14   0   26.82    2.57 
   1 -14   0   33.69    2.61 
  -2 -14   0    8.00    1.43 
  -2  14   0    7.84    1.63 
  -2  14   0    8.57    1.68 
   2  14   0    7.75    1.32 
  -2 -14   0    7.99    1.37 
  -2 -14   0    7.03    1.26 
   2 -14   0    3.29    2.71 
  -2 -14   0    6.10    1.68 
  -2  14   0    6.01    1.40 
  -2 -14   0    7.66    1.88 
   2 -14   0    4.73    1.46 
  -2 -14   0    7.18    1.13 
   2  14   0    5.28    1.32 
  -2 -14   0    6.86    1.45 
   2 -14   0    7.44    1.59 
  -2  14   0    8.21    1.62 
   2 -14   0    9.62    1.68 
   2  14   0    8.46    1.50 
   2 -14   0    5.46    1.66 
   2  14   0    6.28    1.97 
  -2  14   0    8.64    1.81 
   2 -14   0    9.05    2.65 
   2 -14   0    4.85    1.54 
   3  14   0   25.86    2.06 
   3  14   0   25.59    2.25 
   3  14   0   28.50    2.90 
  -3 -14   0   22.62    2.98 
  -3  14   0   23.23    2.82 
  -3 -14   0   23.17    2.15 
  -3  14   0   30.15    2.94 
  -3  14   0   22.51    2.66 
   3 -14   0   25.51    2.52 
  -3 -14   0   22.10    1.63 
  -3  14   0   20.92    2.58 
   3  14   0   27.17    2.13 
  -3 -14   0   26.31    3.02 
   3 -14   0   22.62    2.64 
   3 -14   0   28.43    3.61 
  -3 -14   0   22.22    2.25 
   3 -14   0   25.07    2.71 
   3 -14   0   26.23    2.95 
   3  14   0   28.01    2.28 
   3 -14   0   22.67    2.87 
   3 -14   0   24.72    2.46 
  -3 -14   0   26.93    2.30 
  -3  14   0   21.20    2.60 
  -3 -14   0   25.35    2.18 
  -4  14   0    3.59    1.73 
  -4  14   0    3.48    1.60 
  -4 -14   0    5.43    1.41 
  -4 -14   0    5.09    1.79 
  -4  14   0    5.62    1.96 
  -4 -14   0    3.04    1.20 
  -4  14   0    3.88    1.77 
   4 -14   0    3.61    1.76 
   4  14   0    3.94    1.30 
   4 -14   0    0.54    1.73 
   4 -14   0    2.78    1.55 
  -4  14   0    3.72    1.79 
  -4 -14   0    4.72    1.32 
   4 -14   0    2.82    1.36 
   4  14   0    4.14    1.24 
   4 -14   0    3.14    1.82 
   4  14   0    3.74    1.72 
  -4  14   0    6.76    1.67 
   4  14   0    4.52    1.20 
   4 -14   0    6.66    1.88 
  -4 -14   0    2.13    1.67 
   4  14   0    4.26    1.10 
  -4 -14   0    4.31    0.74 
  -4 -14   0    3.66    1.16 
   5 -14   0   40.19    3.40 
  -5 -14   0   36.94    2.31 
   5  14   0   41.42    2.46 
   5  14   0   36.05    3.42 
  -5  14   0   31.10    3.26 
  -5 -14   0   37.75    2.53 
   5 -14   0   43.49    3.52 
  -5 -14   0   36.43    3.59 
  -5  14   0   37.54    3.56 
  -5 -14   0   36.98    3.40 
   5 -14   0   40.20    4.88 
  -5 -14   0   40.02    2.45 
   5  14   0   34.16    2.39 
  -5 -14   0   41.63    2.50 
   5  14   0   38.02    2.20 
  -5  14   0   39.10    3.11 
   5 -14   0   36.18    2.57 
  -5  14   0   44.56    3.61 
   5 -14   0   35.52    3.40 
  -5  14   0   29.30    3.33 
   5  14   0   35.12    2.50 
   5 -14   0   36.73    3.67 
   5 -14   0   41.66    3.53 
  -5  14   0   34.10    3.19 
  -6  14   0   32.01    3.66 
   6  14   0   28.44    2.01 
  -6  14   0   33.36    3.23 
  -6  14   0   30.95    3.70 
  -6 -14   0   32.45    2.43 
  -6 -14   0   25.46    3.44 
   6 -14   0   30.43    3.35 
  -6 -14   0   22.49    2.75 
  -6 -14   0   28.29    2.32 
   6 -14   0   26.98    2.84 
   6 -14   0   30.07    3.16 
   6  14   0   28.90    2.23 
  -6 -14   0   22.90    2.04 
  -6  14   0   31.71    3.35 
   6 -14   0   30.84    3.20 
   6  14   0   36.19    3.62 
   6  14   0   28.98    2.43 
  -6  14   0   29.17    4.14 
   6 -14   0   30.47    3.51 
  -6  14   0   32.69    3.22 
   6 -14   0   27.50    3.44 
  -7  14   0    0.83    2.28 
  -7  14   0    3.67    2.34 
   7 -14   0    2.45    2.37 
   7 -14   0    0.87    2.27 
   7 -14   0    2.24    2.06 
  -7  14   0    1.77    2.27 
  -7 -14   0    3.92    2.26 
  -7 -14   0    1.77    1.28 
  -7  14   0    0.93    2.19 
  -7 -14   0    3.05    1.56 
  -7  14   0    2.76    2.08 
   7  14   0    2.56    1.32 
   7 -14   0    1.28    1.30 
  -7 -14   0    2.68    1.14 
   7  14   0    0.34    1.02 
   7  14   0    3.17    2.19 
   7  14   0    0.20    1.30 
  -7 -14   0    2.87    1.24 
   7 -14   0   -0.14    2.04 
   8  14   0   -0.21    1.00 
  -8  14   0    2.42    2.65 
  -8 -14   0   -0.16    1.27 
   8 -14   0   -2.99    2.37 
  -8 -14   0   -2.72    2.24 
  -8 -14   0    0.81    1.13 
  -8  14   0    0.90    2.59 
   8  14   0   -0.04    1.38 
   8 -14   0    2.39    2.69 
   8  14   0    5.55    2.48 
   8 -14   0    2.93    2.34 
  -8  14   0   -1.81    2.41 
  -8  14   0    4.03    2.38 
   8 -14   0    3.97    2.30 
  -8 -14   0    0.43    1.26 
  -9  14   0    6.59    3.06 
   9 -14   0    4.32    3.00 
  -9  14   0    7.14    2.76 
  -9 -14   0    5.84    1.46 
  -9 -14   0    8.05    1.31 
   9  14   0   10.70    2.88 
  -9  14   0    4.22    2.97 
  -9  14   0    6.80    2.83 
   9 -14   0    7.55    3.08 
   9  14   0    7.90    1.55 
  -9 -14   0   10.30    1.54 
   9 -14   0    8.12    2.74 
  -9 -14   0   10.10    2.84 
  10 -14   0    1.64    2.99 
  10 -14   0    5.41    3.30 
 -10 -14   0    4.62    1.43 
  10 -14   0    2.14    3.47 
 -10  14   0    6.41    3.39 
 -10  14   0    6.30    3.38 
  10  14   0    3.38    3.04 
 -10 -14   0   -0.89    2.86 
   0 -15   0    0.14    1.33 
   0  15   0    0.28    1.25 
   0 -15   0   -2.07    1.45 
   0 -15   0    1.64    1.66 
   0 -15   0   -0.56    1.18 
   0  15   0    0.52    1.49 
   0  15   0   -2.92    1.77 
   0 -15   0   -1.75    1.17 
   0 -15   0    0.52    1.36 
   0 -15   0   -2.48    1.29 
   0  15   0    1.63    1.38 
   1  15   0   30.63    2.47 
  -1 -15   0   32.34    2.49 
   1  15   0   28.02    2.49 
  -1  15   0   27.23    2.59 
   1  15   0   29.42    2.99 
   1  15   0   32.66    2.67 
  -1 -15   0   34.01    2.68 
  -1 -15   0   27.08    3.05 
  -1 -15   0   27.38    3.10 
   1 -15   0   30.67    2.71 
  -1 -15   0   31.05    2.50 
   1 -15   0   27.31    2.71 
   1 -15   0   30.17    2.75 
   1  15   0   28.22    2.64 
  -1  15   0   33.71    2.78 
   1 -15   0   30.75    2.81 
  -1  15   0   31.29    2.87 
  -1  15   0   33.46    2.89 
  -1 -15   0   28.30    2.61 
   1 -15   0   28.61    2.90 
   1 -15   0   28.89    2.84 
   1 -15   0   30.71    3.14 
  -2 -15   0    0.58    1.18 
  -2  15   0    1.30    1.73 
   2  15   0    0.09    1.20 
  -2 -15   0    0.89    1.26 
  -2  15   0   -0.90    1.54 
  -2 -15   0   -1.17    1.74 
   2 -15   0    1.34    1.50 
   2 -15   0   -0.46    1.61 
   2 -15   0    0.74    1.48 
  -2 -15   0    0.53    0.99 
   2 -15   0   -0.88    1.52 
   2  15   0   -1.15    1.53 
   2  15   0    1.62    1.35 
  -2  15   0    1.69    1.60 
   2 -15   0    0.27    1.64 
  -2 -15   0    0.19    1.65 
   2  15   0    2.00    1.40 
   2 -15   0    2.12    1.51 
  -2 -15   0    0.08    1.30 
  -2 -15   0    1.65    1.32 
   2 -15   0    1.38    1.64 
  -3 -15   0   80.88    4.42 
  -3  15   0   89.43    4.37 
  -3  15   0   78.13    4.06 
   3  15   0   78.34    3.53 
  -3 -15   0   81.03    3.64 
   3 -15   0   84.00    4.18 
   3 -15   0   88.59    4.29 
   3 -15   0   90.03    4.30 
   3  15   0   74.97    3.38 
   3 -15   0   82.21    4.36 
   3 -15   0   88.41    4.24 
  -3 -15   0   79.12    3.50 
  -3 -15   0   86.27    3.60 
  -3  15   0   80.11    4.04 
   3 -15   0   78.37    4.26 
  -3 -15   0   74.70    3.56 
  -3 -15   0   90.32    4.48 
  -3  15   0   88.93    4.34 
   3  15   0   80.96    3.61 
   3 -15   0   79.00    3.78 
   3  15   0   91.49    4.43 
  -3 -15   0   75.95    2.95 
  -3  15   0   77.85    4.09 
   3  15   0   77.10    3.55 
  -4 -15   0    6.61    1.44 
  -4  15   0    4.18    1.83 
  -4 -15   0    7.21    1.51 
  -4 -15   0    5.27    2.67 
   4 -15   0    6.29    1.59 
  -4  15   0    6.60    2.36 
  -4  15   0    7.46    2.50 
  -4  15   0    3.79    1.71 
   4 -15   0    8.55    2.16 
   4 -15   0    5.95    2.03 
  -4  15   0    6.17    1.92 
  -4 -15   0    4.58    1.40 
   4 -15   0    9.02    2.46 
   4  15   0    7.32    1.31 
   4  15   0    4.86    1.37 
  -4 -15   0    5.45    0.84 
   4  15   0    8.52    1.55 
  -4 -15   0    4.49    1.31 
   4 -15   0    4.82    2.05 
   4  15   0    7.95    2.19 
   4  15   0    5.31    1.48 
   4 -15   0    4.71    1.98 
   4 -15   0    3.32    1.81 
  -4 -15   0    6.82    2.17 
   5 -15   0   27.62    3.44 
   5 -15   0   25.59    3.44 
  -5  15   0   20.52    2.56 
  -5  15   0   15.67    2.26 
   5 -15   0   20.65    2.84 
   5  15   0   25.89    2.34 
   5 -15   0   29.16    3.55 
  -5 -15   0   26.20    2.25 
  -5  15   0   21.60    2.60 
   5 -15   0   18.06    2.55 
   5 -15   0   20.66    2.57 
  -5 -15   0   20.02    2.82 
  -5 -15   0   24.28    2.49 
   5  15   0   18.19    2.02 
  -5 -15   0   24.31    2.39 
  -5  15   0   31.17    3.38 
   5 -15   0   19.31    2.49 
   5  15   0   19.71    2.33 
  -5  15   0   19.89    2.58 
  -5 -15   0   20.06    2.18 
   5  15   0   18.76    2.81 
  -6 -15   0    0.52    1.36 
   6  15   0    3.06    1.44 
   6 -15   0   -2.38    2.09 
  -6 -15   0    2.26    1.21 
   6  15   0    1.40    1.15 
  -6  15   0    0.71    2.06 
   6 -15   0   -0.19    2.25 
  -6  15   0   -2.14    2.09 
   6 -15   0    1.61    1.47 
  -6 -15   0    1.90    1.27 
  -6 -15   0    2.57    2.32 
   6 -15   0   -1.20    1.99 
  -6  15   0    2.67    2.32 
   6 -15   0   -2.30    2.46 
  -6 -15   0    2.20    1.31 
   6 -15   0    0.13    2.25 
  -6  15   0   -0.94    2.15 
  -6  15   0    0.80    2.41 
   6  15   0   -0.47    2.04 
  -7 -15   0    1.43    1.48 
  -7 -15   0    4.60    1.35 
  -7  15   0    1.65    2.40 
  -7  15   0    5.88    3.65 
   7 -15   0    7.76    2.42 
   7 -15   0    2.59    2.35 
  -7  15   0    1.73    2.70 
   7  15   0    3.63    1.55 
   7  15   0    4.28    2.40 
   7 -15   0    4.57    2.41 
  -7 -15   0    2.98    2.00 
  -7  15   0   -3.69    2.11 
   7 -15   0    1.74    1.55 
  -7 -15   0    3.69    2.40 
   7 -15   0   -2.63    2.54 
  -7 -15   0    2.03    1.33 
  -8 -15   0    4.23    2.51 
  -8 -15   0    3.77    1.48 
  -8  15   0   -1.37    2.55 
  -8  15   0   -2.92    2.71 
  -8 -15   0    0.08    1.24 
  -8 -15   0   -1.96    1.41 
   8 -15   0   -0.74    3.06 
   8 -15   0    2.10    2.70 
   8 -15   0    0.89    2.79 
   8  15   0    3.07    1.67 
   8  15   0   -3.74    2.42 
   8 -15   0    0.62    2.47 
  -8  15   0   -0.45    2.44 
   9 -15   0   17.16    3.59 
   9 -15   0    6.93    3.01 
  -9 -15   0   10.83    1.61 
  -9  15   0   12.81    3.46 
  -9 -15   0   15.21    3.19 
  -9  15   0    4.71    3.32 
   9 -15   0    8.29    3.57 
  -9 -15   0   12.82    1.41 
   9  15   0   12.18    3.07 
  -9  15   0   11.31    3.26 
   0 -16   0    5.66    1.89 
   0  16   0    5.26    1.70 
   0 -16   0    9.33    1.85 
   0  16   0    3.53    1.52 
   0 -16   0    4.00    1.51 
   0 -16   0    4.96    2.87 
   0 -16   0    3.52    1.43 
   0 -16   0    4.57    1.65 
   0  16   0    6.12    1.76 
   0  16   0    6.28    1.73 
   0  16   0    4.78    1.84 
   0 -16   0    6.58    2.01 
   1  16   0    8.75    1.90 
   1 -16   0    8.10    1.90 
  -1 -16   0    6.54    1.64 
  -1 -16   0    7.04    1.47 
   1 -16   0    7.95    1.71 
  -1 -16   0    7.76    2.11 
   1 -16   0    5.41    1.90 
  -1 -16   0    5.98    1.71 
   1 -16   0    7.63    1.69 
  -1  16   0    9.14    2.01 
  -1 -16   0    8.19    1.69 
  -1  16   0    7.74    1.77 
   1 -16   0   11.50    2.25 
  -1 -16   0    8.35    2.08 
   1 -16   0    8.54    2.00 
  -1 -16   0    7.10    1.72 
   1  16   0    5.91    1.79 
   1  16   0    7.00    1.93 
  -1  16   0    8.37    1.91 
   1 -16   0    7.13    1.84 
   1  16   0    7.46    1.67 
   1  16   0    7.02    1.71 
  -2  16   0   10.01    2.06 
   2 -16   0   16.58    2.24 
  -2 -16   0   14.23    1.84 
  -2  16   0   14.09    2.31 
   2  16   0   15.24    2.03 
   2 -16   0   13.93    2.09 
  -2 -16   0   11.42    2.40 
   2 -16   0   12.62    2.17 
   2  16   0   15.11    1.99 
  -2 -16   0   12.80    1.53 
  -2 -16   0   15.14    1.92 
  -2 -16   0   15.72    1.95 
   2 -16   0   11.84    2.10 
  -2  16   0   12.48    2.18 
   2 -16   0   14.05    2.28 
  -2 -16   0   11.35    1.91 
   2  16   0   18.28    2.47 
  -2 -16   0    9.84    2.18 
   2 -16   0   13.39    2.17 
   2 -16   0   17.13    2.42 
  -3 -16   0    1.09    1.51 
   3  16   0    3.71    1.37 
   3  16   0    3.71    2.06 
  -3 -16   0    0.09    1.03 
   3  16   0    4.43    1.56 
  -3 -16   0    0.12    1.42 
   3 -16   0    2.28    1.83 
  -3 -16   0    2.48    1.42 
   3 -16   0    1.50    1.97 
  -3  16   0    3.88    1.80 
  -3 -16   0   -1.34    1.33 
   3 -16   0    0.56    1.72 
  -3 -16   0   -0.53    1.86 
   3 -16   0   -0.07    1.95 
  -3  16   0    4.47    1.97 
   3  16   0    3.21    1.57 
  -3  16   0    2.44    1.98 
   3 -16   0    2.55    1.89 
   3 -16   0    2.75    1.89 
   3 -16   0    0.97    1.90 
   4 -16   0    4.80    2.15 
   4  16   0    5.16    1.68 
   4 -16   0    4.91    1.82 
  -4 -16   0    4.52    1.47 
  -4 -16   0    6.36    2.22 
   4 -16   0    3.77    2.15 
  -4 -16   0    3.13    1.48 
   4 -16   0    2.15    2.16 
   4 -16   0    5.80    2.10 
   4  16   0    3.68    2.17 
  -4  16   0   -2.45    2.98 
  -4 -16   0    3.22    1.51 
   4  16   0    5.24    1.62 
   4 -16   0    3.72    2.16 
  -4 -16   0    3.24    0.84 
   4  16   0    2.56    1.36 
  -4  16   0    2.47    2.27 
   4 -16   0    7.31    2.28 
  -4  16   0    3.01    1.91 
  -4 -16   0    4.70    1.56 
  -5 -16   0    3.81    1.49 
  -5  16   0    2.01    2.20 
  -5  16   0   -1.82    2.04 
   5 -16   0    4.61    2.38 
   5  16   0   -0.24    1.27 
   5 -16   0    0.06    2.08 
  -5 -16   0    1.63    1.54 
   5 -16   0    4.72    2.33 
   5  16   0   -1.51    2.10 
   5  16   0    3.24    1.64 
   5 -16   0   -2.48    2.05 
   5 -16   0    0.83    1.66 
  -5 -16   0    1.55    2.11 
   5 -16   0    0.35    2.28 
  -5 -16   0    2.14    1.46 
  -5 -16   0    1.56    1.37 
   5  16   0    3.13    1.50 
  -6 -16   0   30.88    2.90 
   6 -16   0   27.60    3.04 
   6 -16   0   23.87    3.19 
   6 -16   0   29.48    3.37 
   6 -16   0   26.39    3.22 
  -6 -16   0   26.20    2.61 
   6 -16   0   23.53    3.08 
  -6 -16   0   28.70    2.55 
  -6  16   0   33.39    4.14 
   6  16   0   29.51    2.92 
  -6 -16   0   25.76    3.23 
   6  16   0   34.44    4.32 
  -6  16   0   34.53    4.24 
   7 -16   0    2.30    2.98 
  -7  16   0   -1.96    2.45 
   7 -16   0   -0.38    2.53 
  -7 -16   0    1.66    1.44 
   7 -16   0    0.66    2.78 
  -7 -16   0   -1.87    2.67 
  -7  16   0    6.16    2.97 
   7  16   0    0.75    1.97 
  -7 -16   0   -0.01    1.44 
   7 -16   0   -0.04    2.68 
  -7 -16   0   -0.90    2.03 
   7  16   0   -4.64    2.52 
   8  16   0   -0.72    2.93 
  -8  16   0   -0.89    2.92 
   8 -16   0    3.45    2.88 
  -8 -16   0    0.89    2.91 
  -8  16   0   -1.82    3.02 
  -8 -16   0   -0.23    1.48 
   8 -16   0    0.35    3.05 
  -8 -16   0   -1.35    1.36 
   8 -16   0   -2.71    2.70 
   0 -17   0    3.25    2.11 
   0  17   0    0.70    1.83 
   0  17   0    1.90    1.64 
   0 -17   0    1.81    1.81 
   0 -17   0   -1.62    1.44 
   0 -17   0    0.85    1.61 
   0 -17   0    1.47    1.79 
   0 -17   0    0.77    1.84 
   0 -17   0    3.09    1.97 
  -1 -17   0   53.32    4.23 
   1 -17   0   53.03    3.65 
   1 -17   0   50.26    3.67 
  -1  17   0   54.16    3.76 
   1 -17   0   52.99    3.64 
  -1 -17   0   46.09    3.45 
   1  17   0   43.88    3.30 
   1 -17   0   44.74    4.00 
   1  17   0   47.18    3.89 
  -1 -17   0   48.35    3.19 
  -1 -17   0   48.98    3.41 
  -1  17   0   52.27    3.85 
  -1 -17   0   51.63    3.35 
  -1 -17   0   53.54    3.43 
   1 -17   0   60.78    3.72 
   1 -17   0   52.65    3.72 
   1  17   0   50.75    3.73 
   1 -17   0   57.85    4.23 
  -2 -17   0    2.77    2.29 
  -2 -17   0    4.30    1.72 
  -2 -17   0    2.31    1.57 
   2 -17   0   -2.19    1.79 
   2 -17   0    6.15    2.32 
   2 -17   0   -2.24    1.83 
   2 -17   0   -1.05    2.02 
  -2  17   0    6.37    2.16 
   2  17   0    2.19    1.87 
  -2 -17   0    3.05    1.62 
   2 -17   0   -2.26    1.89 
  -2 -17   0    0.19    1.66 
   2 -17   0   -1.52    1.78 
   2  17   0   -1.26    1.74 
   2  17   0    0.98    1.92 
   2 -17   0    2.39    1.99 
  -2  17   0   -0.58    1.88 
   3 -17   0   34.15    3.80 
   3 -17   0   31.14    3.66 
  -3 -17   0   29.05    2.88 
   3 -17   0   27.57    3.16 
   3 -17   0   23.88    2.93 
   3  17   0   36.35    3.96 
  -3 -17   0   25.89    3.07 
   3  17   0   27.32    2.67 
  -3 -17   0   34.46    3.06 
   3 -17   0   22.53    2.74 
  -3 -17   0   25.82    2.85 
  -3  17   0   32.51    3.84 
   3 -17   0   35.00    3.73 
  -3  17   0   30.24    3.87 
  -3 -17   0   30.66    2.31 
   3  17   0   40.10    3.16 
  -3 -17   0   30.50    4.02 
   3 -17   0   32.31    3.50 
   4 -17   0    6.20    1.99 
   4  17   0    6.44    1.76 
   4 -17   0    4.71    2.41 
  -4 -17   0    2.95    2.41 
  -4 -17   0    4.26    1.75 
   4 -17   0    4.64    2.41 
   4 -17   0    3.75    2.28 
  -4  17   0    3.78    2.28 
  -4 -17   0    2.44    1.57 
   4 -17   0    0.94    2.25 
  -4  17   0    5.59    2.51 
  -4 -17   0    3.83    1.66 
  -4 -17   0    3.64    0.96 
   4  17   0    7.01    2.26 
  -4 -17   0    6.44    1.71 
   4 -17   0    1.49    2.35 
   4  17   0    3.64    2.28 
   5 -17   0   -3.12    1.89 
   5 -17   0   -6.75    3.50 
   5 -17   0   -4.55    2.32 
  -5  17   0    1.45    2.64 
   5 -17   0   -0.30    2.55 
   5  17   0   -3.08    2.43 
  -5 -17   0    0.81    1.55 
  -5  17   0    0.29    2.60 
  -5 -17   0   -1.03    1.58 
   5 -17   0    1.11    2.30 
   5 -17   0    4.47    2.43 
  -5 -17   0   -0.02    2.37 
  -5 -17   0    0.74    1.91 
  -6 -17   0   10.17    1.81 
  -6  17   0    3.78    2.75 
   6 -17   0   15.23    3.15 
  -6 -17   0    5.34    1.71 
   6 -17   0    7.11    2.77 
  -6  17   0    5.48    2.74 
   6 -17   0    8.35    2.88 
   6 -17   0    0.81    2.57 
  -6 -17   0    9.02    2.98 
   6  17   0   10.83    2.79 
  -7 -17   0   10.60    1.88 
  -7 -17   0   15.14    1.89 
   7  17   0   14.60    3.28 
  -7  17   0   19.56    3.48 
   7 -17   0   21.06    3.50 
  -7  17   0   21.17    3.58 
  -7 -17   0   13.33    3.08 
   7 -17   0   12.76    3.26 
   0 -18   0    2.23    2.00 
   0 -18   0   -1.23    1.77 
   0  18   0    5.90    2.07 
   0 -18   0   -0.20    2.01 
   0 -18   0    3.13    2.22 
   0 -18   0    1.28    1.88 
   0  18   0   -2.48    2.05 
   0 -18   0    2.23    2.13 
   1 -18   0   12.08    2.43 
  -1  18   0    9.82    2.45 
  -1 -18   0    6.49    1.82 
  -1 -18   0    9.25    2.32 
   1 -18   0   11.70    2.42 
   1 -18   0    8.51    2.41 
   1  18   0   11.45    2.18 
  -1 -18   0   11.14    2.63 
   1  18   0    8.95    2.27 
  -1 -18   0   10.08    2.19 
  -1 -18   0    8.68    2.60 
   1 -18   0    8.40    2.19 
   1 -18   0    6.76    2.49 
   1 -18   0    9.21    2.35 
  -1 -18   0    8.00    2.05 
  -1  18   0    8.37    2.15 
   2  18   0    1.05    2.28 
  -2 -18   0    3.73    1.95 
  -2  18   0   -0.09    2.21 
   2 -18   0    1.72    2.30 
  -2  18   0    6.84    3.81 
   2 -18   0    4.06    2.28 
  -2 -18   0    4.42    2.23 
   2  18   0    6.02    2.13 
   2 -18   0    1.83    2.11 
   2 -18   0    2.60    2.30 
  -2 -18   0    2.60    1.86 
   2 -18   0    3.37    2.51 
  -2 -18   0    4.77    2.47 
   2 -18   0    0.31    2.34 
   2 -18   0   -0.69    2.53 
  -2 -18   0    2.67    1.62 
   3 -18   0    5.65    2.73 
  -3  18   0    6.57    2.65 
   3  18   0    0.99    2.38 
  -3  18   0    4.67    2.53 
   3  18   0    3.09    2.09 
   3 -18   0   -0.94    2.42 
   3 -18   0    2.85    2.28 
  -3 -18   0    3.47    2.59 
  -3 -18   0    2.42    1.81 
  -3 -18   0   -0.77    1.76 
   3 -18   0    3.31    2.54 
   3 -18   0    4.33    2.48 
   4  18   0    3.54    2.69 
  -4 -18   0    1.62    2.72 
   4 -18   0    1.00    2.51 
  -4  18   0    2.81    2.59 
   4 -18   0    2.39    2.60 
   4 -18   0    2.90    2.45 
   4 -18   0    4.88    2.64 
  -4 -18   0    3.56    1.84 
   4 -18   0    5.17    2.29 
  -4  18   0    2.90    2.60 
  -4 -18   0    3.96    1.83 
   5 -18   0    6.54    2.98 
  -5  18   0    9.79    3.23 
   5 -18   0    9.45    2.98 
   5  18   0    8.22    2.94 
  -5  18   0    7.22    2.78 
  -5 -18   0    6.63    1.91 
  -5 -18   0   14.06    3.14 
   5 -18   0    5.69    2.83 
  -5 -18   0    3.34    1.87 
  -6 -18   0   14.18    2.06 
   6 -18   0   15.81    3.30 
  -6  18   0   11.08    5.32 
   6 -18   0   19.18    3.52 
  -6 -18   0   14.50    3.18 
  -6 -18   0   22.08    3.07 
   6  18   0   16.98    3.94 
  -6  18   0   17.46    3.67 
   6 -18   0    9.44    3.22 
   0 -19   0    0.39    2.21 
   0 -19   0   -1.80    2.08 
   0 -19   0    2.49    2.15 
   0 -19   0    4.52    2.59 
   0  19   0   -1.03    2.39 
  -1 -19   0    8.94    2.78 
  -1  19   0    8.91    2.67 
   1 -19   0    7.38    2.81 
   1 -19   0    7.41    2.49 
   1 -19   0    6.72    2.49 
   1 -19   0    4.54    2.50 
   1  19   0   10.00    2.57 
  -1 -19   0   10.16    2.32 
  -1 -19   0    7.82    2.22 
   2  19   0    1.63    2.56 
  -2 -19   0   -3.52    1.97 
  -2 -19   0    6.58    2.76 
  -2  19   0    3.13    2.53 
   2 -19   0    2.64    2.50 
  -2 -19   0    2.21    2.15 
   2 -19   0    3.82    2.46 
   2 -19   0   -0.66    2.66 
   2 -19   0    3.42    2.68 
   2  19   0    3.37    3.00 
   3 -19   0    7.54    2.81 
  -3 -19   0    5.93    2.23 
   3 -19   0    5.05    2.83 
  -3 -19   0    4.42    2.05 
   3 -19   0    2.57    2.73 
  -3 -19   0    6.79    2.99 
  -3  19   0    4.44    2.83 
   3 -19   0    0.65    3.13 
   3  19   0    5.80    2.67 
   4 -19   0    7.07    3.04 
  -4 -19   0   11.57    3.25 
  -4 -19   0   14.67    2.31 
  -4  19   0    8.02    3.26 
   4 -19   0    9.92    2.85 
  -4 -19   0    7.81    2.14 
   4  19   0    4.96    2.77 
   4 -19   0    6.06    3.13 
   5 -19   0    4.01    3.14 
  -5  19   0    5.85    3.02 
  -5 -19   0    2.21    3.00 
   5 -19   0    5.25    3.13 
  -5 -19   0    6.32    2.13 
   0 -20   0    2.47    2.50 
   0  20   0    4.34    3.28 
   0 -20   0    2.20    2.96 
   0 -20   0    5.66    2.59 
   1 -20   0   18.06    2.90 
   1 -20   0   13.93    3.35 
   1 -20   0   11.42    2.88 
  -1 -20   0   23.40    3.55 
  -1 -20   0   13.30    2.78 
  -1 -20   0   20.37    2.92 
  -1  20   0   19.77    3.27 
  -2  20   0   -3.50    2.92 
   2 -20   0   -0.98    2.88 
  -2 -20   0    3.53    2.35 
   2 -20   0   -3.91    2.61 
   2 -20   0    6.70    3.83 
  -2   0   1   13.76    0.80 
  -2   0  -1   13.70    0.76 
  -2   0  -1   12.89    0.72 
  -2   0   1   12.45    0.59 
   2   0  -1   13.01    0.74 
  -2   0   1   12.06    0.54 
   2   0   1   12.28    0.69 
   2   0  -1   13.19    0.60 
  -2   0  -1   13.90    0.92 
   2   0  -1   12.43    0.60 
   2   0   1   12.91    0.72 
  -2   0   1   13.86    0.64 
   2   0  -1   12.86    0.55 
  -2   0   1   12.72    0.63 
   2   0   1   13.15    0.70 
  -2   0  -1   12.43    0.72 
  -2   0  -1   12.23    0.70 
   2   0   1   12.59    0.72 
   2   0   1   13.39    0.70 
  -2   0   1   12.70    0.60 
   2   0  -1   12.78    0.59 
   3   0  -1   82.14    2.48 
  -3   0  -1   83.05    2.41 
   3   0  -1   83.30    2.34 
   3   0  -1   84.96    2.35 
  -3   0  -1   82.21    2.46 
  -3   0   1   84.37    2.49 
   3   0   1   81.84    2.41 
   3   0   1   86.85    2.44 
   3   0  -1   82.68    2.33 
  -3   0   1   81.20    2.33 
  -3   0  -1   83.78    2.44 
  -3   0  -1   85.85    2.46 
  -3   0   1   87.47    2.37 
   3   0   1   80.88    2.42 
  -3   0   1   83.39    2.32 
  -3   0   1   85.35    2.36 
   3   0   1   85.26    2.44 
  -3   0  -1   84.25    2.43 
  -3   0  -1   85.72    2.45 
   3   0   1   82.38    2.41 
  -3   0   1   83.06    2.35 
  -4   0  -1   19.55    1.16 
   4   0   1   19.77    1.11 
   4   0  -1   19.47    0.99 
  -4   0   1   19.05    1.04 
   4   0  -1   19.33    1.18 
   4   0  -1   19.28    1.01 
  -4   0   1   18.81    0.96 
   4   0  -1   20.71    0.96 
  -4   0   1   19.29    1.03 
   4   0   1   19.32    1.08 
   4   0   1   19.15    1.09 
  -4   0   1   21.05    1.24 
  -4   0   1   20.43    1.07 
  -4   0  -1   19.35    1.10 
  -4   0  -1   21.12    1.16 
  -4   0  -1   19.95    1.22 
  -4   0  -1   20.34    1.19 
   4   0   1   20.47    1.16 
  -4   0   1   20.37    1.07 
   4   0   1   21.54    1.14 
  -4   0  -1   19.34    1.09 
   5   0   1  236.88    6.12 
   5   0  -1  239.65    6.18 
  -5   0  -1  228.68    6.22 
  -5   0   1  230.18    6.34 
   5   0   1  231.87    6.21 
  -5   0   1  240.63    6.19 
  -5   0   1  230.20    6.14 
   5   0  -1  239.04    6.16 
   5   0   1  231.43    6.29 
  -5   0  -1  235.37    6.25 
   5   0  -1  237.28    6.34 
   5   0   1  232.13    6.23 
  -5   0   1  234.07    6.12 
   5   0   1  231.94    6.23 
   5   0   1  237.04    6.26 
  -5   0  -1  229.25    6.28 
  -5   0  -1  233.41    6.30 
  -5   0   1  237.58    6.17 
   5   0  -1  234.67    6.15 
  -5   0  -1  233.20    6.21 
  -5   0   1  234.04    6.18 
  -5   0  -1  232.99    6.25 
   5   0  -1  235.84    5.99 
   6   0   1   13.59    1.40 
   6   0  -1   15.53    1.42 
   6   0   1   16.65    1.24 
  -6   0  -1   15.08    1.40 
  -6   0  -1   15.03    1.34 
   6   0  -1   15.75    1.21 
   6   0   1   16.21    1.42 
  -6   0  -1   14.37    1.31 
   6   0   1   15.07    1.30 
   6   0  -1   15.89    1.10 
   6   0   1   14.85    1.27 
  -6   0   1   15.84    1.55 
   6   0  -1   15.24    1.29 
  -6   0   1   14.02    1.16 
  -6   0  -1   16.21    1.42 
  -6   0   1   15.98    1.29 
   6   0  -1   14.73    1.26 
  -6   0   1   16.49    1.32 
  -6   0  -1   16.66    1.46 
  -6   0  -1   13.95    1.26 
  -6   0   1   13.77    1.21 
  -6   0   1   13.21    1.31 
   6   0   1   15.03    1.27 
  -7   0   1    0.89    0.90 
   7   0   1    1.49    0.81 
  -7   0  -1    1.10    0.77 
   7   0  -1    0.73    1.24 
   7   0  -1    0.61    0.77 
  -7   0   1    0.00    0.76 
   7   0   1    0.20    0.75 
   7   0   1    0.57    0.81 
   7   0  -1    0.62    0.79 
   7   0   1   -0.01    0.72 
  -7   0   1   -0.10    0.68 
  -7   0   1    1.29    0.72 
   7   0   1   -0.26    0.71 
   7   0  -1    0.69    0.70 
   7   0  -1    0.25    0.59 
  -7   0  -1    0.83    0.80 
  -7   0  -1    2.10    0.85 
  -7   0  -1    1.52    0.81 
  -7   0   1    0.53    0.76 
  -7   0  -1    1.40    0.91 
   7   0   1    1.49    0.83 
  -7   0  -1    0.57    0.85 
  -7   0   1    0.23    0.73 
   8   0  -1   15.67    1.56 
   8   0   1   18.18    1.70 
  -8   0   1   16.43    1.72 
  -8   0  -1   15.81    1.71 
   8   0   1   18.48    1.70 
  -8   0   1   19.27    1.63 
  -8   0  -1   19.22    1.97 
  -8   0   1   16.78    1.63 
  -8   0   1   16.36    1.49 
  -8   0   1   17.87    1.99 
   8   0   1   19.12    1.59 
  -8   0   1   17.94    1.73 
   8   0  -1   17.70    1.39 
   8   0  -1   18.29    1.70 
   8   0   1   13.76    1.68 
  -8   0  -1   15.98    1.83 
   8   0   1   16.50    1.80 
  -8   0  -1   19.05    1.86 
  -8   0  -1   16.73    1.60 
   8   0   1   18.29    1.87 
   8   0  -1   17.16    1.90 
   8   0  -1   18.18    1.60 
  -8   0  -1   16.51    1.85 
   8   0  -1   16.35    1.65 
   9   0   1   10.61    1.28 
   9   0   1   10.63    1.48 
  -9   0   1   10.10    1.30 
   9   0   1    9.51    1.45 
   9   0  -1    9.81    1.44 
   9   0  -1    9.60    1.36 
   9   0  -1    9.73    1.37 
  -9   0   1    9.65    1.27 
  -9   0  -1    7.67    1.34 
  -9   0  -1    9.73    1.39 
   9   0   1   10.91    1.44 
  -9   0   1    8.28    1.27 
  -9   0   1   10.67    1.41 
   9   0  -1    8.74    1.20 
   9   0   1    9.45    1.38 
  -9   0   1    9.02    1.37 
   9   0  -1   11.46    1.46 
  -9   0  -1   10.54    1.43 
  -9   0  -1   11.40    1.53 
   9   0  -1   11.04    1.30 
  -9   0   1   11.35    1.59 
   9   0   1    8.04    1.35 
  -9   0  -1   11.18    1.58 
  -9   0  -1   12.06    1.51 
  10   0  -1    1.89    1.29 
 -10   0   1   -0.22    1.11 
 -10   0   1   -0.43    1.20 
  10   0   1    2.23    1.32 
  10   0   1    0.02    1.07 
  10   0  -1   -1.70    1.15 
  10   0   1   -0.04    1.16 
  10   0   1    0.13    1.33 
 -10   0  -1    0.80    1.33 
 -10   0  -1   -0.94    1.26 
  10   0  -1    0.89    1.12 
  10   0  -1    0.79    0.96 
  10   0  -1    0.32    1.36 
 -10   0  -1   -0.40    1.17 
 -10   0   1    0.12    1.12 
  10   0  -1   -0.87    1.05 
 -10   0   1    1.98    1.39 
 -10   0  -1   -0.38    1.13 
  10   0   1    1.03    1.40 
  10   0   1   -1.46    1.24 
 -10   0   1    0.62    1.15 
 -10   0  -1    0.50    1.21 
 -10   0   1   -1.28    1.85 
 -10   0  -1   -0.28    1.30 
  11   0  -1   31.58    2.10 
 -11   0  -1   18.76    2.15 
 -11   0   1   25.60    2.37 
  11   0  -1   25.61    2.65 
 -11   0   1   26.91    2.54 
 -11   0  -1   24.54    2.81 
  11   0   1   28.26    2.27 
  11   0   1   26.16    2.96 
 -11   0   1   30.92    3.08 
 -11   0  -1   23.20    2.60 
  11   0  -1   24.87    2.59 
  11   0  -1   28.71    2.43 
 -11   0  -1   28.11    2.71 
 -11   0   1   27.28    2.62 
  11   0  -1   25.45    3.02 
  11   0   1   30.21    2.83 
 -11   0  -1   28.48    2.73 
  11   0   1   23.47    2.89 
 -11   0   1   22.04    2.52 
 -11   0   1   25.06    2.69 
 -11   0  -1   27.15    2.51 
 -12   0  -1    5.33    1.80 
 -12   0  -1    0.10    1.63 
  12   0   1   -0.03    1.97 
  12   0  -1    0.66    1.74 
  12   0   1    4.34    1.43 
  12   0   1   -0.79    1.84 
 -12   0   1    0.99    1.86 
 -12   0   1    3.39    1.66 
  12   0  -1    1.83    1.49 
  12   0  -1    3.47    2.04 
 -12   0   1   -0.27    1.62 
 -12   0   1   -0.11    1.54 
 -12   0   1    0.28    1.70 
  12   0   1   -2.69    1.87 
 -12   0  -1    3.15    1.94 
 -12   0  -1    2.88    1.69 
 -12   0  -1    2.30    1.72 
 -12   0   1    4.62    1.68 
  12   0  -1    1.59    1.27 
  13   0  -1   17.85    2.86 
 -13   0  -1   15.77    2.36 
 -13   0  -1   11.88    2.39 
  13   0   1   13.81    3.00 
  13   0   1   16.33    1.96 
 -13   0   1   10.53    2.44 
 -13   0   1   13.65    2.46 
 -13   0  -1    9.56    2.36 
 -13   0   1   13.13    2.22 
  13   0   1   14.20    2.69 
 -13   0   1   10.13    2.23 
   2  -1   1   99.88    2.78 
  -2  -1  -1  101.39    2.60 
   2   1  -1   93.87    2.78 
  -2   1   1   99.91    2.70 
  -2   1   1   99.66    2.69 
   2  -1   1  100.58    2.75 
   2  -1   1   96.90    2.73 
  -2   1   1  102.17    2.72 
  -2  -1  -1  101.48    2.67 
   2   1  -1  103.33    2.54 
  -2   1   1   98.30    2.71 
   2   1  -1  101.43    2.55 
  -2  -1  -1  103.82    2.69 
   2  -1   1  103.00    2.77 
  -2  -1  -1  102.05    2.69 
  -2   1   1  101.39    2.83 
   2   1  -1  101.27    2.68 
   2   1  -1  101.53    2.54 
  -2   1   1  101.88    2.62 
   2  -1   1  100.45    2.74 
  -2  -1  -1  101.83    2.67 
   2  -1   1  100.23    2.75 
   2   1   1  110.43    2.92 
  -2  -1   1  112.38    2.79 
   2  -1  -1  112.65    2.96 
   2  -1  -1  113.71    2.95 
  -2   1  -1  112.90    3.05 
   2  -1  -1  105.62    2.89 
  -2   1  -1  109.94    3.01 
   2   1   1  112.00    2.93 
   2  -1  -1  111.51    2.95 
  -2   1  -1  113.60    3.01 
  -2  -1   1  107.07    2.80 
  -2   1  -1  113.20    3.01 
  -2   1  -1  109.25    2.97 
  -2  -1   1  113.14    2.92 
  -2   1  -1  116.57    3.01 
   2  -1  -1  112.94    3.07 
   2  -1  -1  110.35    2.95 
   2   1   1  112.56    2.85 
   2   1   1  108.92    2.91 
  -2  -1   1  109.28    2.78 
  -2  -1   1  110.32    2.80 
   3   1  -1  210.37    5.28 
  -3   1   1  217.01    5.46 
  -3  -1  -1  209.16    5.38 
   3  -1   1  214.40    5.50 
   3  -1   1  214.54    5.48 
   3   1  -1  214.67    5.37 
   3   1  -1  210.17    5.29 
  -3  -1  -1  212.85    5.36 
   3   1  -1  211.55    5.43 
  -3  -1  -1  212.40    5.40 
   3  -1   1  216.37    5.55 
   3   1  -1  209.74    5.27 
   3   1  -1  207.67    5.29 
  -3  -1  -1  212.56    5.41 
  -3  -1  -1  206.27    5.38 
   3  -1   1  209.65    5.49 
  -3   1   1  210.41    5.45 
   3  -1   1  212.92    5.49 
   3  -1   1  213.97    5.50 
  -3   1   1  210.67    5.41 
  -3   1   1  213.44    5.37 
  -3   1   1  207.01    5.56 
  -3   1   1  211.15    5.43 
  -3  -1   1  207.67    5.15 
   3  -1  -1  210.28    5.24 
  -3  -1   1  202.10    5.15 
  -3  -1   1  208.16    5.30 
  -3   1  -1  201.41    5.39 
   3  -1  -1  205.14    5.02 
   3   1   1  207.55    5.26 
   3  -1  -1  209.84    5.29 
  -3   1  -1  206.64    5.35 
   3   1   1  177.54    5.35 
  -3  -1   1  208.04    5.15 
   3   1   1  204.49    5.27 
  -3  -1   1  204.89    5.13 
  -3   1  -1  211.27    5.37 
   3  -1  -1  206.56    5.42 
   3   1   1  209.25    5.22 
  -3   1  -1  216.68    5.35 
   3   1   1  209.45    5.30 
   3  -1  -1  205.47    5.29 
  -3   1  -1  201.29    5.34 
   3  -1  -1  208.43    5.30 
  -3  -1   1  202.78    5.20 
  -3   1  -1  207.91    5.36 
   3  -1  -1  203.02    5.34 
   4  -1   1  153.53    4.16 
   4   1  -1  149.21    3.93 
  -4   1   1  144.40    4.07 
  -4   1   1  148.77    4.26 
   4  -1   1  149.47    4.13 
  -4  -1  -1  148.06    4.03 
   4  -1   1  151.23    4.16 
  -4   1   1  151.27    4.11 
  -4  -1  -1  147.14    4.05 
   4   1  -1  150.66    4.00 
  -4  -1  -1  149.75    4.08 
  -4  -1  -1  153.00    4.08 
  -4   1   1  150.12    4.04 
   4  -1   1  148.61    4.16 
  -4  -1  -1  147.43    4.04 
  -4   1   1  149.14    4.11 
   4   1  -1  145.42    4.10 
   4   1  -1  153.30    3.96 
   4   1  -1  150.57    3.97 
  -4   1   1  151.21    4.07 
   4   1  -1  148.11    3.93 
   4  -1   1  148.51    4.21 
  -4   1  -1  158.49    4.36 
   4  -1  -1  161.85    4.28 
  -4  -1   1  155.48    4.14 
   4  -1  -1  156.97    4.27 
  -4   1  -1  155.13    4.39 
   4  -1  -1  157.80    4.27 
   4  -1  -1  158.39    4.28 
  -4  -1   1  154.71    4.15 
  -4  -1   1  155.57    4.11 
  -4  -1   1  159.05    4.14 
   4   1   1  156.16    4.24 
   4   1   1  159.55    4.24 
  -4   1  -1  155.88    4.31 
  -4   1  -1  160.93    4.37 
  -4   1  -1  158.45    4.33 
   4   1   1  156.70    4.24 
   4   1   1  158.14    4.26 
   4   1   1  157.44    4.22 
  -4  -1   1  151.84    4.12 
  -4   1  -1  155.13    4.35 
  -4  -1   1  155.64    4.30 
   4  -1  -1  158.34    4.44 
   5   1  -1   66.96    2.38 
   5  -1   1   67.25    2.40 
  -5   1   1   66.94    2.33 
   5  -1   1   68.20    2.42 
  -5   1   1   69.15    2.40 
  -5  -1  -1   71.95    2.38 
   5  -1   1   67.16    2.42 
   5   1  -1   68.32    2.24 
  -5   1   1   71.44    2.62 
   5   1  -1   66.61    2.25 
  -5   1   1   69.11    2.38 
   5  -1   1   70.03    2.44 
   5   1  -1   71.00    2.22 
   5  -1   1   67.39    2.53 
  -5  -1  -1   70.04    2.30 
   5   1  -1   71.09    2.23 
   5   1  -1   67.23    2.18 
  -5  -1  -1   69.84    2.37 
  -5  -1  -1   70.53    2.36 
  -5  -1  -1   65.88    2.31 
  -5   1   1   67.43    2.35 
  -5   1   1   69.00    2.33 
  -5  -1   1   73.75    2.31 
   5  -1  -1   73.03    2.42 
   5   1   1   69.26    2.38 
  -5   1  -1   72.71    2.65 
  -5  -1   1   70.59    2.25 
   5   1   1   71.55    2.39 
   5  -1  -1   71.08    2.64 
   5   1   1   72.54    2.42 
   5   1   1   72.77    2.42 
  -5  -1   1   69.81    2.49 
   5  -1  -1   71.32    2.40 
   5  -1  -1   72.75    2.42 
  -5  -1   1   68.81    2.28 
  -5   1  -1   71.10    2.49 
  -5   1  -1   72.45    2.53 
   5  -1  -1   70.82    2.43 
  -5  -1   1   73.10    2.31 
  -5   1  -1   73.21    2.49 
   5   1   1   73.05    2.42 
   5  -1  -1   72.02    2.09 
  -5   1  -1   70.47    2.52 
  -5   1  -1   71.42    2.53 
  -6   1   1    3.00    0.75 
  -6   1   1    3.93    0.77 
  -6  -1  -1    2.82    0.76 
   6  -1   1    4.08    0.87 
   6  -1   1    4.47    0.74 
  -6   1   1    2.92    0.80 
   6  -1   1    2.79    0.75 
  -6   1   1    3.61    0.97 
   6   1  -1    4.14    0.72 
   6   1  -1    3.55    0.72 
   6   1  -1    3.59    0.66 
  -6   1   1    3.94    0.88 
   6  -1   1    4.38    0.91 
  -6  -1  -1    4.07    0.79 
   6   1  -1    2.83    0.77 
  -6  -1  -1    3.49    0.78 
  -6  -1  -1    3.16    0.77 
  -6   1   1    4.19    0.79 
   6  -1   1    3.44    0.84 
  -6  -1  -1    2.63    0.74 
  -6  -1  -1    4.71    0.85 
   6   1  -1    3.67    0.74 
   6  -1   1    3.20    0.75 
   6   1  -1    3.63    0.67 
  -6   1  -1    2.35    0.84 
  -6  -1   1    1.65    0.63 
   6   1   1    1.65    0.66 
   6  -1  -1    2.95    0.82 
   6  -1  -1    1.16    0.64 
  -6  -1   1    1.46    0.66 
  -6  -1   1    1.39    0.69 
   6  -1  -1    0.66    0.51 
  -6   1  -1    1.97    0.74 
   6  -1  -1    1.28    0.66 
   6   1   1    0.89    0.71 
   6  -1  -1    2.51    0.75 
   6   1   1    1.25    0.69 
   6   1   1    2.18    0.75 
   6  -1  -1    2.03    0.83 
  -6  -1   1    1.35    0.63 
  -6  -1   1    2.28    0.78 
  -6   1  -1    1.09    0.84 
   6   1   1    1.57    0.65 
  -6   1  -1    2.31    0.78 
  -6  -1   1    2.54    0.73 
  -6   1  -1    1.81    0.77 
  -6   1  -1    2.46    0.90 
   7   1  -1    4.33    0.92 
  -7  -1  -1    3.12    0.94 
  -7   1   1    3.26    0.87 
   7   1  -1    3.42    0.74 
  -7   1   1    3.80    0.90 
  -7   1   1    5.60    1.02 
  -7   1   1    4.39    0.95 
  -7  -1  -1    4.74    0.94 
  -7  -1  -1    5.09    0.94 
   7   1  -1    4.50    0.81 
   7   1  -1    2.84    0.76 
   7  -1   1    1.15    0.80 
   7  -1   1    1.88    0.92 
  -7   1   1    3.94    0.90 
  -7  -1  -1    2.72    0.83 
   7  -1   1    3.97    0.78 
  -7  -1  -1    3.04    0.90 
  -7   1   1    3.18    1.07 
   7  -1   1    4.51    0.98 
   7   1  -1    3.58    0.85 
   7   1  -1    3.35    0.78 
  -7  -1  -1    3.58    0.87 
   7  -1   1    2.38    0.89 
   7  -1   1    4.40    0.92 
   7  -1  -1    3.83    1.00 
   7  -1  -1    3.26    0.91 
   7  -1  -1    2.86    0.82 
  -7   1  -1    5.25    1.09 
   7   1   1    3.56    0.84 
   7  -1  -1    2.86    0.91 
   7   1   1    3.55    1.06 
  -7  -1   1    3.54    0.85 
   7   1   1    4.21    0.87 
  -7  -1   1    3.40    0.81 
   7   1   1    3.59    0.90 
   7  -1  -1    2.67    0.80 
  -7   1  -1    4.53    0.98 
   7  -1  -1    5.39    0.68 
  -7  -1   1    4.17    0.79 
  -7  -1   1    2.85    0.82 
  -7   1  -1    4.35    1.09 
  -7   1  -1    2.20    0.87 
  -7   1  -1    3.34    0.89 
  -7  -1   1    3.12    0.79 
  -7  -1   1    4.39    0.96 
  -7   1  -1    3.51    0.93 
   7   1   1    3.04    0.90 
   8  -1   1  126.62    3.83 
   8  -1   1  132.17    4.30 
   8  -1   1  126.65    4.23 
  -8   1   1  127.99    4.47 
  -8   1   1  125.13    4.11 
  -8   1   1  121.67    4.10 
   8  -1   1  131.98    4.27 
  -8  -1  -1  120.97    4.06 
   8   1  -1  128.63    3.98 
  -8  -1  -1  127.05    4.08 
  -8  -1  -1  126.50    4.19 
  -8   1   1  129.74    4.21 
   8  -1   1  128.18    4.25 
  -8   1   1  126.87    4.16 
   8   1  -1  126.59    4.25 
  -8  -1  -1  129.86    4.15 
   8   1  -1  128.36    3.90 
   8   1  -1  132.94    4.02 
  -8  -1  -1  128.31    4.13 
   8  -1   1  108.53    5.73 
   8   1  -1  130.37    4.05 
  -8  -1  -1  120.14    4.20 
  -8   1   1  133.02    4.20 
   8   1  -1  127.36    3.93 
   8  -1  -1  134.53    4.25 
  -8  -1   1  132.49    4.39 
   8   1   1  133.22    4.22 
   8   1   1  131.54    4.28 
  -8  -1   1  127.83    4.19 
  -8   1  -1  128.88    4.30 
   8  -1  -1  137.10    4.33 
   8   1   1  132.95    4.19 
  -8   1  -1  127.87    4.32 
   8  -1  -1  121.97    4.63 
   8   1   1  137.05    4.26 
   8  -1  -1  136.86    4.24 
  -8  -1   1  131.27    4.04 
  -8   1  -1  137.06    4.39 
  -8   1  -1  134.66    4.40 
   8   1   1  132.57    4.12 
  -8   1  -1  123.96    4.49 
  -8  -1   1  126.51    4.09 
  -8   1  -1  127.72    4.50 
   8  -1  -1  130.96    3.73 
   8  -1  -1  118.88    4.48 
  -8  -1   1  134.34    4.16 
  -8  -1   1  134.26    4.12 
   9  -1   1   74.59    3.28 
   9   1  -1   74.77    2.92 
  -9   1   1   84.28    3.34 
   9   1  -1   73.79    3.03 
  -9   1   1   69.46    3.07 
  -9  -1  -1   77.30    3.17 
   9   1  -1   75.08    2.96 
   9  -1   1   72.27    3.22 
  -9   1   1   75.53    3.52 
  -9  -1  -1   72.42    3.12 
  -9  -1  -1   78.36    3.09 
  -9   1   1   74.88    3.17 
  -9  -1  -1   81.22    3.33 
   9  -1   1   79.29    3.39 
  -9   1   1   80.84    3.26 
   9   1  -1   73.57    3.40 
  -9  -1  -1   75.59    3.31 
   9   1  -1   78.83    3.07 
   9   1  -1   78.21    2.91 
   9  -1   1   78.13    3.28 
  -9  -1  -1   78.46    3.13 
  -9   1   1   74.52    3.17 
   9  -1   1   77.02    2.83 
   9  -1   1   75.56    3.51 
  -9   1  -1   73.23    3.22 
  -9  -1   1   71.72    3.22 
  -9  -1   1   64.96    2.86 
   9  -1  -1   73.41    3.07 
  -9  -1   1   73.14    2.97 
  -9   1  -1   69.07    3.37 
   9   1   1   71.95    3.05 
   9  -1  -1   71.59    3.01 
   9   1   1   67.25    3.03 
  -9   1  -1   68.80    3.18 
  -9   1  -1   67.27    3.19 
  -9   1  -1   65.41    3.08 
   9  -1  -1   72.00    3.02 
   9  -1  -1   71.80    3.34 
   9   1   1   71.72    3.00 
  -9  -1   1   68.55    3.00 
  -9   1  -1   65.01    3.08 
   9  -1  -1   72.78    2.46 
  -9  -1   1   72.85    2.92 
   9   1   1   65.47    3.16 
  -9  -1   1   67.73    2.79 
   9   1   1   71.18    2.93 
 -10   1   1   11.35    1.55 
 -10  -1  -1   15.69    2.28 
  10  -1   1   12.45    1.77 
  10  -1   1   11.27    1.69 
 -10  -1  -1   13.99    1.58 
  10  -1   1    8.19    1.52 
 -10   1   1   10.37    1.53 
  10  -1   1   12.35    1.69 
  10   1  -1   11.42    1.35 
 -10  -1  -1   14.30    1.67 
 -10   1   1   10.33    1.73 
 -10   1   1   12.97    1.77 
  10   1  -1   12.93    1.61 
  10   1  -1   12.83    1.49 
  10   1  -1   14.64    1.98 
  10   1  -1   13.63    1.85 
  10   1  -1    9.43    1.59 
 -10  -1  -1    9.70    1.69 
  10  -1   1   13.54    1.78 
 -10  -1  -1   14.97    2.08 
 -10   1   1   10.28    1.50 
 -10   1   1   11.92    1.59 
 -10  -1  -1   12.13    2.07 
  10  -1   1    7.50    1.67 
  10   1   1   10.69    1.55 
 -10   1  -1   10.69    1.60 
 -10  -1   1   13.01    1.84 
  10  -1  -1   11.82    1.69 
 -10   1  -1   11.49    1.65 
  10   1   1   12.11    1.64 
  10   1   1   12.69    1.70 
 -10  -1   1   11.49    1.48 
 -10  -1   1   11.11    1.46 
 -10  -1   1   12.05    1.50 
 -10   1  -1   11.65    1.69 
  10  -1  -1   11.11    1.53 
  10  -1  -1   10.61    1.76 
 -10  -1   1   11.51    1.65 
  10  -1  -1   13.34    1.69 
  10   1   1   14.31    2.00 
 -10   1  -1   10.73    1.73 
  10   1   1   12.31    1.62 
 -10   1  -1   11.80    1.70 
  10  -1  -1   11.60    1.47 
 -10  -1   1    9.84    1.57 
 -10   1  -1   12.07    1.65 
  10   1   1   12.98    1.56 
  11   1  -1    5.02    1.29 
  11  -1   1    4.65    1.55 
  11   1  -1    7.13    1.69 
 -11  -1  -1    7.45    1.56 
  11  -1   1    9.64    1.92 
 -11  -1  -1    6.17    1.54 
 -11   1   1    5.93    1.66 
  11  -1   1    6.33    1.80 
  11   1  -1    6.37    1.57 
  11   1  -1    7.64    1.55 
 -11   1   1    5.33    1.83 
 -11  -1  -1    5.93    1.62 
  11  -1   1    6.50    1.29 
 -11   1   1    7.98    1.72 
  11   1  -1    8.59    1.43 
  11  -1   1    5.84    1.78 
  11   1  -1    8.82    2.42 
 -11   1   1    7.37    1.56 
 -11   1   1    7.18    1.62 
 -11  -1  -1    5.08    1.78 
 -11  -1  -1    6.56    1.50 
 -11   1   1    6.89    1.58 
 -11  -1  -1    5.69    1.60 
 -11   1  -1    6.75    1.77 
  11   1   1    8.26    1.71 
 -11  -1   1    6.51    1.55 
 -11  -1   1    7.76    1.68 
 -11  -1   1    5.05    1.40 
 -11  -1   1    8.47    1.55 
 -11   1  -1    2.72    1.63 
 -11  -1   1    7.17    1.52 
  11  -1  -1    7.82    1.73 
  11  -1  -1    5.97    1.98 
 -11   1  -1    7.12    1.67 
  11  -1  -1    8.91    1.73 
  11   1   1    9.69    1.53 
  11  -1  -1    7.62    1.12 
  11   1   1    7.61    1.48 
  11  -1  -1    2.83    1.78 
 -11   1  -1    7.75    1.73 
 -11   1  -1    6.22    1.71 
  11   1   1    7.69    1.76 
  11   1   1    4.44    1.61 
 -11  -1   1    7.88    1.72 
 -11   1  -1    6.94    1.64 
  12  -1   1    5.09    1.37 
  12  -1   1    4.65    1.78 
 -12  -1  -1    4.01    1.70 
  12  -1   1    1.23    2.11 
 -12  -1  -1    5.19    1.77 
 -12   1   1    6.67    1.85 
 -12   1   1    3.22    1.76 
 -12  -1  -1    8.10    1.87 
  12   1  -1    4.60    1.49 
  12   1  -1    2.71    1.73 
 -12   1   1    4.23    1.69 
 -12   1   1    2.31    1.75 
  12  -1   1    5.64    2.05 
  12   1  -1    1.63    1.39 
 -12  -1  -1    2.19    1.66 
 -12  -1  -1    3.00    1.92 
  12   1  -1    7.48    2.10 
 -12   1   1    0.95    1.89 
 -12  -1  -1    7.14    1.79 
  12  -1  -1    1.60    1.89 
  12  -1  -1    5.05    1.68 
 -12  -1   1    3.26    1.58 
  12   1   1    1.73    1.51 
 -12   1  -1    2.68    1.89 
  12  -1  -1    2.96    1.13 
 -12   1  -1    4.50    1.75 
 -12  -1   1    2.19    1.77 
 -12  -1   1   -0.85    1.48 
 -12  -1   1    4.06    1.65 
 -12   1  -1    0.94    1.79 
 -12   1  -1    4.66    1.78 
 -12   1  -1   -0.10    1.83 
 -12   1  -1    2.34    1.87 
 -12  -1   1    4.21    2.16 
  12   1   1    6.10    1.55 
  12   1   1    1.97    1.89 
  12   1   1    8.29    2.01 
  12  -1  -1    0.40    2.05 
 -13  -1  -1   10.70    2.20 
  13   1  -1   12.32    2.28 
 -13  -1  -1   11.17    2.16 
  13  -1   1    6.84    2.72 
 -13  -1  -1   12.28    2.38 
  13  -1   1   12.37    2.58 
 -13   1   1   12.61    2.26 
 -13   1   1   13.13    2.58 
 -13   1   1    7.90    2.39 
 -13   1   1   11.83    2.29 
  13   1  -1    9.54    2.55 
 -13   1  -1   15.68    2.50 
 -13   1  -1   17.59    2.64 
 -13  -1   1    8.30    2.50 
 -13   1  -1   12.45    2.48 
 -13  -1   1   15.76    2.42 
  13   1   1    7.52    2.44 
  13   1   1   15.04    2.02 
 -13  -1   1   14.80    2.14 
 -13  -1   1   10.89    2.14 
  -1  -2  -1  253.63    6.11 
  -1  -2  -1  221.60    6.00 
   1   2  -1  252.81    6.10 
   1  -2   1  240.51    6.08 
  -1  -2  -1  236.95    6.02 
   1  -2   1  230.72    6.21 
   1   2  -1  248.54    5.88 
   1   2  -1  245.62    5.88 
   1  -2   1  228.36    6.06 
  -1   2   1  249.26    6.10 
   1  -2   1  255.46    6.11 
   1  -2   1  255.66    6.15 
   1  -2   1  253.16    6.09 
  -1   2   1  242.68    6.08 
  -1  -2  -1  250.94    6.02 
  -1   2   1  246.47    5.92 
  -1   2   1  252.84    6.14 
  -1   2   1  230.98    6.00 
  -1   2   1  242.01    6.07 
  -1  -2  -1  248.80    6.03 
  -1   2  -1  239.26    6.27 
   1   2   1  249.84    6.04 
  -1  -2   1  240.56    5.90 
  -1   2  -1  245.54    6.10 
   1   2   1  249.01    6.12 
   1  -2  -1  243.60    6.14 
  -1  -2   1  246.89    5.90 
   1  -2  -1  253.98    6.11 
  -1   2  -1  257.51    6.10 
  -1   2  -1  255.03    6.17 
  -1  -2   1  246.55    6.10 
  -1  -2   1  244.61    5.89 
  -1  -2   1  242.42    5.90 
   1  -2  -1  228.44    6.09 
   1  -2  -1  250.01    5.94 
   1   2   1  251.02    6.04 
   1  -2  -1  236.88    6.14 
  -1   2  -1  246.04    6.10 
   1   2   1  250.47    6.04 
   1  -2  -1  246.49    6.04 
  -1  -2   1  245.40    6.10 
  -1   2  -1  245.54    6.09 
   1  -2  -1  221.40    6.08 
  -2   2   1  207.35    5.23 
  -2   2   1  206.85    5.12 
   2  -2   1  205.66    5.31 
  -2  -2  -1  203.17    5.11 
  -2   2   1  201.83    5.31 
  -2  -2  -1  201.17    5.12 
  -2   2   1  209.89    5.25 
   2   2  -1  203.99    4.94 
  -2  -2  -1  199.67    5.10 
   2  -2   1  202.93    5.24 
  -2   2   1  204.89    5.21 
   2   2  -1  204.73    4.94 
   2  -2   1  200.16    5.24 
  -2   2   1  199.16    5.23 
   2   2  -1  204.53    4.95 
   2  -2   1  202.42    5.23 
   2  -2   1  203.36    5.25 
   2  -2   1  204.57    5.26 
   2   2  -1  208.65    5.22 
  -2  -2  -1  201.71    5.11 
  -2  -2  -1  203.69    4.93 
   2  -2  -1  211.93    5.40 
   2   2   1  213.12    5.30 
   2  -2  -1  213.92    5.41 
  -2  -2   1  209.71    5.12 
   2  -2  -1  212.48    5.29 
  -2  -2   1  211.51    5.13 
   2  -2  -1  211.72    5.41 
  -2  -2   1  205.98    5.13 
  -2   2  -1  211.71    5.44 
   2   2   1  213.09    5.11 
  -2   2  -1  212.59    5.40 
   2  -2  -1  218.99    5.41 
   2  -2  -1  214.94    5.50 
   2   2   1  214.65    5.30 
  -2   2  -1  216.78    5.42 
   2  -2  -1  192.82    5.08 
  -2   2  -1  216.15    5.44 
  -2  -2   1  199.92    5.27 
  -2   2  -1  212.40    5.49 
   2   2   1  210.93    5.29 
  -2  -2   1  212.72    5.38 
  -2   2  -1  213.94    5.42 
  -2  -2   1  209.50    5.12 
   2   2   1  209.84    5.41 
  -3   2   1  361.85    8.98 
  -3  -2  -1  340.85    8.80 
   3  -2   1  368.16    9.01 
   3  -2   1  358.34    8.97 
   3   2  -1  359.70    8.90 
  -3   2   1  355.16    9.08 
  -3  -2  -1  355.94    8.82 
  -3  -2  -1  330.35    8.72 
  -3  -2  -1  361.33    8.84 
  -3   2   1  359.82    8.94 
  -3   2   1  353.98    8.97 
   3  -2   1  358.41    9.00 
   3   2  -1  359.74    8.69 
  -3   2   1  355.50    8.94 
   3   2  -1  363.71    8.68 
   3   2  -1  358.03    8.81 
   3   2  -1  359.38    8.67 
   3  -2   1  356.34    9.06 
  -3  -2  -1  355.25    8.83 
  -3   2   1  359.19    8.84 
   3  -2   1  366.24    9.00 
   3  -2   1  357.53    8.97 
   3   2   1  346.48    8.40 
  -3   2  -1  338.85    8.75 
   3  -2  -1  347.87    8.65 
   3  -2  -1  339.38    8.53 
  -3   2  -1  346.47    8.70 
   3  -2  -1  345.27    8.64 
  -3  -2   1  334.34    8.36 
   3   2   1  345.66    8.53 
  -3   2  -1  349.45    8.68 
   3   2   1  341.48    8.64 
   3   2   1  348.86    8.53 
   3   2   1  340.66    8.52 
  -3  -2   1  345.42    8.51 
  -3   2  -1  343.81    8.66 
   3  -2  -1  353.23    8.80 
   3  -2  -1  346.92    8.66 
  -3  -2   1  333.58    8.38 
  -3  -2   1  345.29    8.38 
  -3   2  -1  345.12    8.68 
   3  -2  -1  353.42    8.67 
  -3  -2   1  341.23    8.38 
  -3   2  -1  339.68    8.69 
  -3  -2   1  344.22    8.60 
  -4   2   1   31.32    1.43 
   4   2  -1   31.53    1.17 
   4  -2   1   31.52    1.49 
   4   2  -1   32.78    1.44 
   4   2  -1   32.07    1.18 
  -4  -2  -1   32.16    1.36 
  -4   2   1   33.19    1.52 
  -4  -2  -1   34.08    1.29 
  -4   2   1   33.30    1.52 
   4  -2   1   32.54    1.50 
  -4   2   1   33.92    1.72 
   4  -2   1   33.25    1.56 
  -4  -2  -1   31.12    1.31 
  -4   2   1   29.98    1.45 
   4   2  -1   32.63    1.34 
   4   2  -1   32.90    1.20 
   4  -2   1   33.08    1.56 
   4   2  -1   32.69    1.17 
  -4   2   1   31.23    1.35 
  -4  -2  -1   32.00    1.31 
  -4  -2  -1   32.24    1.33 
   4  -2   1   35.32    1.59 
   4  -2   1   31.62    1.61 
   4   2   1   35.51    1.33 
  -4  -2   1   34.34    1.45 
   4   2   1   35.22    1.42 
   4  -2  -1   37.23    1.58 
  -4   2  -1   35.20    1.58 
  -4  -2   1   35.39    1.28 
   4  -2  -1   35.85    1.54 
  -4   2  -1   35.48    1.57 
  -4  -2   1   35.13    1.25 
  -4  -2   1   36.79    1.29 
   4  -2  -1   36.07    1.55 
  -4   2  -1   37.56    1.75 
  -4  -2   1   34.69    1.27 
  -4   2  -1   36.85    1.63 
  -4   2  -1   36.15    1.60 
   4  -2  -1   39.95    1.51 
   4   2   1   36.25    1.40 
  -4   2  -1   34.77    1.64 
  -4  -2   1   36.40    1.45 
   4   2   1   35.85    1.57 
   4  -2  -1   35.75    1.70 
   4  -2  -1   37.63    1.58 
   4  -2  -1   34.88    1.05 
  -5   2   1   71.26    2.56 
  -5   2   1   71.55    2.50 
   5  -2   1   67.32    2.66 
   5   2  -1   71.71    2.25 
  -5   2   1   71.88    2.55 
   5  -2   1   75.96    2.59 
   5   2  -1   70.16    2.37 
   5   2  -1   71.81    2.23 
   5   2  -1   71.06    2.19 
   5  -2   1   72.57    2.57 
  -5   2   1   70.72    2.75 
  -5  -2  -1   71.18    2.32 
   5   2  -1   72.55    2.21 
   5  -2   1   75.14    2.60 
  -5  -2  -1   71.25    2.34 
  -5  -2  -1   71.71    2.36 
  -5  -2  -1   70.59    2.34 
   5  -2   1   75.06    2.58 
  -5   2   1   72.77    2.41 
  -5  -2  -1   68.10    2.37 
   5   2  -1   73.68    2.43 
   5  -2   1   72.83    2.57 
  -5   2   1   70.87    2.47 
  -5  -2   1   68.94    2.13 
  -5   2  -1   70.76    2.56 
   5  -2  -1   69.51    2.44 
   5   2   1   68.09    2.45 
  -5  -2   1   69.41    2.18 
   5  -2  -1   67.42    2.44 
  -5  -2   1   67.49    2.33 
  -5   2  -1   68.94    2.48 
   5  -2  -1   67.48    2.42 
  -5   2  -1   68.63    2.49 
   5   2   1   70.04    2.31 
  -5  -2   1   69.30    2.18 
  -5   2  -1   70.42    2.67 
  -5  -2   1   71.49    2.37 
  -5   2  -1   70.18    2.50 
   5  -2  -1   69.91    2.68 
  -5   2  -1   67.11    2.50 
   5  -2  -1   70.19    2.46 
   5   2   1   71.40    2.34 
   5   2   1   67.36    2.24 
   5   2   1   69.25    2.32 
  -5  -2   1   70.21    2.20 
   6  -2   1   30.81    1.75 
   6  -2   1   34.30    1.85 
   6   2  -1   29.95    1.44 
  -6   2   1   32.00    1.69 
   6   2  -1   31.66    1.64 
  -6  -2  -1   30.75    1.63 
  -6  -2  -1   31.98    1.64 
  -6   2   1   28.80    1.69 
   6  -2   1   35.33    1.84 
   6   2  -1   30.86    1.43 
  -6   2   1   31.30    1.62 
  -6   2   1   30.84    1.76 
  -6  -2  -1   30.83    1.60 
  -6  -2  -1   31.46    1.57 
   6  -2   1   31.51    1.77 
  -6   2   1   33.35    2.10 
   6   2  -1   30.44    1.61 
   6   2  -1   31.65    1.44 
  -6   2   1   31.55    1.78 
   6  -2   1   32.04    1.95 
   6   2  -1   31.76    1.42 
  -6  -2  -1   32.81    1.61 
   6  -2  -1   32.62    1.97 
  -6  -2   1   31.79    1.43 
   6   2   1   35.34    1.66 
   6   2   1   32.72    1.59 
   6  -2  -1   32.62    1.73 
  -6   2  -1   31.79    2.00 
  -6  -2   1   35.57    1.74 
   6  -2  -1   29.52    1.77 
  -6  -2   1   32.61    1.53 
   6  -2  -1   34.37    1.23 
   6  -2  -1   33.91    1.78 
  -6   2  -1   31.49    1.79 
  -6   2  -1   33.12    1.80 
  -6  -2   1   32.21    1.51 
  -6   2  -1   35.80    1.92 
  -6   2  -1   33.60    1.77 
   6   2   1   31.26    1.57 
   6   2   1   28.92    1.69 
   6   2   1   32.84    1.77 
  -6  -2   1   32.90    1.49 
  -6   2  -1   33.06    1.88 
   6   2   1   34.90    1.66 
   6  -2  -1   32.30    1.72 
   7  -2   1   16.65    1.66 
  -7   2   1   16.26    1.59 
   7  -2   1   17.91    1.66 
  -7  -2  -1   17.68    1.48 
   7   2  -1   15.23    1.47 
  -7   2   1   14.51    1.62 
  -7   2   1   15.84    1.93 
   7  -2   1   14.81    1.73 
  -7   2   1   14.13    1.43 
   7  -2   1   14.57    1.57 
  -7   2   1   14.09    1.46 
  -7  -2  -1   14.41    1.35 
   7  -2   1   14.63    1.55 
   7   2  -1   15.86    1.46 
   7   2  -1   15.30    1.31 
   7   2  -1   15.24    1.21 
   7  -2   1   14.98    1.20 
  -7   2   1   14.44    1.45 
  -7  -2  -1   12.87    1.57 
  -7  -2  -1   14.96    1.47 
  -7  -2  -1   13.54    1.39 
   7   2  -1   17.40    1.30 
   7   2  -1   13.51    1.23 
  -7  -2  -1   18.49    1.49 
   7   2   1   15.62    1.39 
   7  -2  -1   14.56    1.63 
  -7   2  -1   16.08    1.54 
  -7  -2   1   14.72    1.34 
  -7  -2   1   16.00    1.30 
   7   2   1   18.16    1.38 
  -7   2  -1   18.04    1.90 
  -7  -2   1   14.66    1.30 
   7  -2  -1   13.61    1.61 
   7   2   1   16.46    2.33 
  -7   2  -1   16.41    1.67 
   7  -2  -1   14.18    1.52 
   7  -2  -1   14.60    1.77 
   7  -2  -1   17.36    1.56 
   7   2   1   14.20    1.32 
  -7   2  -1   14.37    1.60 
  -7   2  -1   17.61    1.69 
  -7  -2   1   17.25    1.59 
  -7   2  -1   15.41    1.62 
   7   2   1   16.51    1.58 
  -7  -2   1   15.09    1.22 
   7  -2  -1   16.84    0.99 
   7   2   1   13.90    1.37 
  -8  -2  -1   17.19    1.80 
  -8   2   1   16.87    2.17 
   8   2  -1   20.21    1.73 
  -8  -2  -1   17.88    1.66 
   8  -2   1   15.77    1.34 
   8  -2   1   20.58    1.93 
   8  -2   1   15.10    2.09 
  -8  -2  -1   18.68    1.75 
   8   2  -1   19.96    1.55 
  -8   2   1   19.23    1.89 
  -8   2   1   18.18    1.78 
   8   2  -1   15.40    1.39 
   8  -2   1   15.77    1.78 
  -8   2   1   17.42    1.69 
  -8  -2  -1   17.92    1.70 
   8   2  -1   17.65    1.67 
  -8   2   1   14.94    1.67 
  -8  -2  -1   18.42    1.66 
   8  -2   1   15.65    1.89 
   8   2  -1   18.13    1.48 
  -8   2   1   13.13    1.75 
   8  -2   1   17.92    1.84 
   8   2  -1   17.70    1.53 
  -8  -2  -1   14.96    1.53 
  -8   2  -1   14.67    1.73 
  -8   2  -1   11.87    1.42 
  -8  -2   1   14.40    1.49 
   8  -2  -1   11.30    1.37 
   8  -2  -1   12.68    1.37 
  -8  -2   1   12.00    1.38 
   8  -2  -1   12.30    1.57 
   8   2   1   12.74    1.58 
   8  -2  -1   13.19    1.04 
   8   2   1   13.67    1.46 
  -8   2  -1   11.86    1.40 
   8  -2  -1   13.10    1.66 
  -8   2  -1   14.89    2.03 
  -8  -2   1   13.56    1.46 
  -8   2  -1   16.54    2.00 
   8   2   1   15.60    1.55 
  -8   2  -1   13.37    1.79 
   8   2   1   11.46    1.50 
  -8  -2   1   13.68    1.42 
  -8  -2   1   13.84    1.40 
   8   2   1   12.72    1.39 
  -8  -2   1   12.23    1.74 
   8  -2  -1   12.97    1.41 
   8   2   1   12.84    1.55 
   9   2  -1    6.70    1.06 
  -9   2   1    4.97    1.27 
  -9   2   1    4.93    1.50 
   9  -2   1    8.04    1.40 
  -9  -2  -1    7.41    1.43 
  -9  -2  -1    6.09    1.20 
   9  -2   1    6.82    1.47 
  -9  -2  -1    6.03    1.20 
   9   2  -1    4.60    1.18 
  -9   2   1    7.34    1.47 
   9   2  -1    7.00    1.17 
  -9  -2  -1    7.70    1.28 
  -9   2   1    8.21    1.35 
   9   2  -1    5.47    0.97 
   9  -2   1    4.68    1.41 
  -9  -2  -1    6.09    1.23 
   9   2  -1    6.88    1.20 
   9  -2   1    3.64    1.25 
  -9   2   1    5.47    1.37 
   9   2  -1    6.24    1.17 
  -9   2   1    5.00    1.20 
   9  -2   1    5.31    1.35 
  -9  -2  -1    7.25    1.26 
   9  -2   1    7.43    1.01 
   9  -2  -1    7.23    1.29 
   9  -2  -1    5.73    1.36 
  -9   2  -1    5.58    1.31 
  -9   2  -1    7.54    1.56 
  -9  -2   1    7.68    1.19 
  -9   2  -1    5.52    1.38 
  -9  -2   1    7.56    1.16 
   9   2   1    9.27    1.35 
   9  -2  -1    6.83    1.28 
   9   2   1    7.97    1.28 
  -9   2  -1    7.36    1.42 
   9   2   1    7.09    1.20 
  -9   2  -1    7.96    1.54 
  -9   2  -1    5.57    1.28 
  -9  -2   1    8.88    1.37 
   9  -2  -1    7.14    1.48 
   9   2   1    5.81    1.11 
   9   2   1    7.17    1.32 
  -9  -2   1    7.94    1.13 
  -9  -2   1    5.49    1.26 
   9   2   1    6.84    1.24 
   9  -2  -1    4.44    1.32 
   9  -2  -1   10.25    1.13 
 -10   2   1   -0.54    1.13 
 -10  -2  -1   -0.17    1.13 
  10   2  -1    0.28    1.08 
 -10  -2  -1    1.44    1.19 
 -10  -2  -1    1.89    1.40 
  10  -2   1   -0.91    1.44 
 -10  -2  -1   -1.45    1.09 
 -10   2   1   -0.58    1.22 
 -10  -2  -1    0.72    1.11 
  10   2  -1   -0.46    1.25 
 -10   2   1    0.08    1.25 
  10   2  -1   -0.77    1.12 
  10  -2   1    1.97    1.30 
  10  -2   1    0.80    1.40 
  10  -2   1    0.78    1.50 
 -10   2   1    0.00    1.25 
  10   2  -1    1.52    1.08 
  10  -2   1    0.14    0.91 
  10  -2   1   -2.11    1.40 
  10   2  -1    0.20    1.13 
  10   2  -1    0.85    0.95 
 -10   2   1   -0.84    1.49 
 -10   2   1   -1.10    1.29 
 -10   2  -1   -1.19    1.41 
 -10  -2   1   -1.41    1.09 
  10  -2  -1    0.06    0.71 
 -10  -2   1    1.14    1.24 
  10   2   1    0.40    1.22 
 -10   2  -1   -1.85    1.27 
  10   2   1   -1.18    1.21 
 -10   2  -1    0.20    1.23 
 -10  -2   1   -0.35    1.31 
 -10   2  -1   -0.75    1.32 
 -10  -2   1   -0.52    1.02 
  10   2   1    0.02    1.05 
  10  -2  -1    0.14    1.20 
  10  -2  -1    0.39    1.24 
  10   2   1    1.96    1.16 
 -10   2  -1    1.58    1.42 
  10  -2  -1   -0.41    1.37 
  10   2   1    1.19    1.24 
 -10   2  -1    0.00    1.29 
  10   2   1    0.24    1.20 
  10  -2  -1    0.49    1.33 
 -10  -2   1   -0.18    1.02 
  10  -2  -1   -0.81    1.41 
 -10  -2   1   -1.33    1.16 
  11  -2   1   24.29    2.58 
 -11   2   1   19.67    2.69 
  11   2  -1   20.70    2.72 
 -11  -2  -1   25.04    2.47 
  11   2  -1   23.85    2.82 
  11  -2   1   18.88    2.31 
 -11  -2  -1   18.70    2.43 
 -11   2   1   23.12    2.53 
  11   2  -1   20.97    2.43 
 -11  -2  -1   19.01    2.30 
  11   2  -1   22.81    2.31 
 -11   2   1   19.53    2.58 
  11   2  -1   20.11    2.35 
  11  -2   1   20.99    2.78 
 -11   2   1   18.59    2.60 
  11   2  -1   22.14    2.10 
 -11  -2  -1   20.75    2.61 
 -11   2   1   19.30    2.51 
 -11  -2  -1   15.56    1.88 
 -11   2   1   16.05    2.27 
  11  -2   1   21.12    1.86 
 -11  -2  -1   18.10    2.28 
  11  -2   1   17.00    2.19 
  11  -2  -1   22.40    2.60 
 -11  -2   1   19.34    2.39 
 -11   2  -1   14.85    1.97 
  11   2   1   16.35    2.19 
  11   2   1   16.32    1.98 
  11  -2  -1   20.47    1.44 
  11   2   1   18.45    2.58 
  11  -2  -1   19.17    2.45 
 -11   2  -1   19.66    2.68 
 -11   2  -1   13.44    2.03 
 -11  -2   1   14.77    2.01 
 -11  -2   1   16.91    1.97 
 -11  -2   1   17.03    2.03 
 -11  -2   1   21.28    2.29 
 -11   2  -1   20.04    3.23 
 -11   2  -1   18.59    2.21 
  11   2   1   18.89    1.96 
 -11  -2   1   16.72    1.80 
  11   2   1   17.58    1.96 
  11  -2  -1   15.61    2.13 
 -11   2  -1   19.68    2.74 
  11  -2  -1   16.22    2.36 
 -12   2   1    3.69    1.87 
 -12  -2  -1    3.69    1.65 
 -12   2   1    4.43    1.88 
  12  -2   1    4.19    3.08 
 -12   2   1    0.63    2.02 
 -12   2   1    3.69    1.70 
  12   2  -1    3.90    1.44 
  12  -2   1    4.40    1.23 
  12   2  -1    3.99    1.70 
  12  -2   1    4.74    2.24 
 -12  -2  -1    4.21    1.70 
 -12   2   1    5.41    1.91 
 -12  -2  -1    2.00    1.61 
 -12  -2  -1    2.24    2.12 
 -12   2   1   -0.24    1.66 
  12   2  -1    3.51    1.52 
  12   2  -1    5.13    1.83 
 -12  -2  -1    4.42    1.70 
 -12  -2  -1    4.10    1.72 
  12  -2   1    3.05    2.07 
  12   2   1    7.52    1.77 
 -12   2  -1    1.49    2.03 
  12   2   1    4.05    1.56 
 -12  -2   1    4.99    1.58 
 -12  -2   1    4.00    1.65 
 -12   2  -1    7.02    1.95 
  12  -2  -1    7.49    2.01 
 -12   2  -1    6.77    2.05 
 -12  -2   1    5.27    1.89 
  12   2   1    5.70    1.86 
 -12  -2   1    5.77    1.49 
  12   2   1    5.88    1.83 
 -12   2  -1    4.02    1.88 
  12  -2  -1    2.88    2.30 
 -12  -2   1    7.14    1.99 
 -12   2  -1    4.25    1.83 
 -12   2  -1    4.89    2.01 
 -12  -2   1    6.82    1.66 
 -13  -2  -1    7.09    2.00 
 -13   2   1   10.92    2.66 
  13   2  -1    6.46    3.84 
 -13   2   1   10.39    2.30 
  13   2  -1   11.45    1.94 
 -13  -2  -1    7.88    1.97 
 -13   2   1    7.15    2.33 
 -13   2   1    6.43    2.10 
  13  -2   1    4.19    2.46 
 -13  -2   1    4.75    2.51 
 -13   2  -1   11.06    2.64 
  13   2   1   12.74    2.10 
 -13   2  -1   10.66    2.44 
 -13  -2   1   10.18    2.18 
 -13   2  -1    8.07    2.22 
 -13  -2   1    9.40    1.97 
  13  -2  -1    4.95    2.77 
 -13  -2   1    5.94    1.85 
   0  -3  -1   62.24    1.88 
   0  -3   1   63.63    1.91 
   0   3   1   62.34    1.82 
   0  -3   1   61.17    1.85 
   0  -3   1   62.36    1.77 
   0  -3   1   62.11    1.78 
   0  -3   1   63.62    1.84 
   0  -3   1   61.31    1.76 
   0   3  -1   62.31    1.87 
   0  -3   1   61.05    1.77 
   0  -3  -1   61.64    1.83 
   0   3   1   61.56    1.84 
   0   3  -1   62.51    1.75 
   0  -3  -1   61.30    1.84 
   0  -3  -1   63.23    1.86 
   0   3  -1   62.33    1.77 
   0  -3  -1   62.20    1.84 
   0  -3  -1   62.56    1.84 
   0   3  -1   62.70    1.88 
   0   3   1   59.22    1.80 
   0   3   1   64.79    1.85 
   0  -3  -1   60.69    1.77 
   0   3  -1   62.06    1.76 
   1   3  -1  377.93    9.25 
   1   3  -1  387.42    9.48 
   1   3  -1  379.20    9.25 
  -1   3   1  388.93    9.50 
   1  -3   1  381.99    9.48 
   1  -3   1  388.19    9.44 
  -1   3   1  389.49    9.47 
   1  -3   1  392.11    9.52 
  -1   3   1  382.86    9.49 
  -1   3   1  378.30    9.47 
   1  -3   1  385.48    9.45 
   1  -3   1  380.50    9.44 
   1   3  -1  380.42    9.25 
   1  -3   1  388.00    9.38 
  -1  -3  -1  373.89    9.37 
  -1  -3  -1  378.19    9.38 
  -1   3   1  381.46    9.44 
  -1  -3  -1  382.39    9.37 
  -1  -3  -1  381.62    9.46 
  -1   3   1  378.83    9.40 
  -1  -3  -1  379.03    9.38 
  -1  -3  -1  376.36    9.19 
   1  -3   1  393.46    9.46 
   1  -3  -1  370.44    9.13 
  -1   3  -1  367.70    9.07 
   1   3   1  367.92    9.02 
  -1   3  -1  368.13    9.07 
  -1  -3   1  366.30    9.11 
   1  -3  -1  373.10    9.12 
   1  -3  -1  368.62    9.11 
  -1  -3   1  358.49    8.90 
   1  -3  -1  377.38    8.96 
   1  -3  -1  364.25    9.06 
  -1   3  -1  370.06    9.15 
   1   3   1  362.07    8.83 
   1  -3  -1  366.14    9.09 
   1   3   1  368.86    9.02 
  -1   3  -1  378.28    9.10 
  -1  -3   1  355.91    8.90 
   1   3   1  366.97    9.11 
   1  -3  -1  367.00    9.11 
  -1  -3   1  368.30    8.90 
  -1   3  -1  367.94    9.09 
   1   3   1  367.51    9.02 
  -1   3  -1  372.07    9.12 
  -1  -3   1  358.68    8.89 
  -1  -3   1  374.47    9.12 
   2  -3   1   64.33    2.04 
  -2   3   1   65.89    2.10 
   2  -3   1   65.89    2.05 
  -2  -3  -1   63.96    1.87 
  -2   3   1   63.19    2.03 
   2   3  -1   64.31    1.69 
   2  -3   1   61.60    2.01 
   2  -3   1   65.26    2.05 
  -2   3   1   61.50    1.98 
  -2  -3  -1   65.37    1.88 
  -2  -3  -1   62.08    1.86 
  -2  -3  -1   64.32    2.05 
  -2  -3  -1   65.54    1.88 
  -2   3   1   65.42    1.93 
  -2   3   1   64.41    2.07 
  -2   3   1   64.43    2.13 
   2  -3   1   64.20    2.14 
   2  -3   1   65.89    2.07 
   2   3  -1   63.02    1.68 
   2   3  -1   65.48    2.06 
   2   3  -1   65.05    1.70 
  -2   3  -1   80.23    2.41 
   2   3   1   81.59    2.47 
  -2  -3   1   76.47    2.11 
   2   3   1   81.41    2.27 
  -2   3  -1   82.58    2.54 
  -2  -3   1   75.37    2.19 
   2   3   1   81.29    2.26 
   2  -3  -1   83.51    2.45 
  -2  -3   1   79.23    2.09 
  -2  -3   1   82.57    2.11 
   2  -3  -1   83.00    2.52 
   2  -3  -1   80.05    2.42 
  -2  -3   1   82.74    2.10 
  -2  -3   1   81.42    2.42 
  -2   3  -1   83.86    2.47 
   2  -3  -1   82.72    2.46 
  -2   3  -1   80.92    2.44 
   2  -3  -1   82.32    2.11 
  -2   3  -1   82.71    2.48 
   2  -3  -1   83.04    2.45 
  -2   3  -1   80.91    2.41 
   2  -3  -1   83.30    2.34 
   2   3   1   79.56    2.27 
  -3  -3  -1  769.52   19.32 
   3   3  -1  784.81   19.18 
  -3   3   1  819.12   19.55 
   3  -3   1  823.57   19.59 
   3  -3   1  821.89   19.68 
   3  -3   1  791.10   19.52 
   3   3  -1  785.54   19.17 
  -3  -3  -1  802.30   19.54 
  -3   3   1  817.27   19.57 
   3   3  -1  803.39   19.51 
   3  -3   1  803.12   19.58 
   3  -3   1  817.21   19.57 
  -3   3   1  801.95   19.67 
   3  -3   1  826.48   19.57 
  -3   3   1  805.40   19.53 
  -3  -3  -1  784.94   19.34 
  -3   3   1  803.72   19.57 
  -3  -3  -1  782.27   19.11 
   3   3  -1  794.07   19.17 
  -3  -3  -1  785.75   19.33 
  -3   3   1  804.68   19.41 
  -3  -3  -1  785.50   19.34 
  -3  -3   1  752.61   18.47 
  -3  -3   1  753.93   18.46 
   3  -3  -1  791.73   18.83 
  -3  -3   1  676.63   18.60 
   3  -3  -1  785.26   18.95 
  -3   3  -1  778.04   18.88 
  -3  -3   1  781.25   18.79 
   3   3   1  761.48   18.63 
  -3  -3   1  750.46   18.56 
   3  -3  -1  797.82   18.86 
   3  -3  -1  773.76   18.82 
  -3  -3   1  745.05   18.45 
   3   3   1  788.33   18.64 
  -3   3  -1  790.63   18.84 
   3   3   1  734.85   18.66 
   3  -3  -1  762.78   18.68 
  -3   3  -1  786.44   18.82 
   3  -3  -1  791.79   18.86 
  -3   3  -1  795.29   18.86 
   3   3   1  776.99   18.84 
  -3   3  -1  780.54   18.94 
   3  -3  -1  757.31   18.37 
  -3   3  -1  802.47   18.89 
   3   3   1  773.81   18.40 
   3   3   1  771.19   18.63 
   4   3  -1   87.91    2.40 
  -4  -3  -1   83.82    2.54 
   4   3  -1   87.82    2.38 
  -4   3   1   83.67    2.76 
   4  -3   1   91.67    2.88 
   4  -3   1   84.27    2.82 
   4   3  -1   84.61    2.36 
   4   3  -1   84.94    2.50 
   4  -3   1   85.03    2.81 
  -4  -3  -1   86.34    2.57 
   4   3  -1   84.46    2.75 
  -4  -3  -1   85.16    2.53 
  -4   3   1   85.54    2.64 
  -4  -3  -1   87.78    2.57 
  -4   3   1   85.72    2.77 
   4  -3   1   87.14    2.79 
   4  -3   1   85.43    2.84 
   4  -3   1   84.69    2.95 
  -4  -3  -1   86.28    2.43 
  -4   3   1   84.29    2.96 
  -4   3   1   87.53    2.80 
  -4   3   1   91.11    2.87 
   4   3   1   86.79    2.42 
   4  -3  -1   86.03    2.98 
   4  -3  -1   90.66    2.73 
   4   3   1   88.71    2.60 
   4   3   1   90.36    2.88 
  -4   3  -1   89.66    2.87 
  -4  -3   1   84.28    2.47 
   4   3   1   88.49    2.62 
  -4   3  -1   90.08    2.92 
   4   3   1   85.85    2.59 
   4  -3  -1   90.39    2.85 
  -4   3  -1   87.15    2.82 
  -4  -3   1   88.33    2.46 
  -4   3  -1   89.76    2.90 
  -4  -3   1   91.17    2.58 
  -4  -3   1   87.37    2.76 
   4  -3  -1   90.27    2.87 
   4  -3  -1   92.11    2.88 
  -4  -3   1   88.68    2.44 
  -4   3  -1   90.07    2.88 
  -4  -3   1   85.60    2.42 
  -4   3  -1   90.62    3.05 
   4   3   1   83.40    2.63 
   4  -3  -1   87.85    2.84 
   5  -3   1    6.51    0.99 
   5   3  -1    5.68    0.72 
   5   3  -1    4.53    0.58 
   5  -3   1    5.55    0.94 
   5  -3   1    4.68    0.88 
   5   3  -1    6.85    0.74 
  -5  -3  -1    4.00    0.68 
   5   3  -1    4.83    0.63 
  -5   3   1    4.47    0.72 
   5  -3   1    5.99    1.02 
   5   3  -1    5.77    0.80 
   5  -3   1    4.69    0.86 
  -5   3   1    5.32    0.87 
  -5   3   1    5.19    0.87 
  -5  -3  -1    7.48    0.88 
  -5  -3  -1    5.89    0.71 
   5   3  -1    4.89    0.87 
  -5   3   1    4.26    1.02 
  -5  -3  -1    4.82    0.74 
  -5   3   1    6.20    0.93 
  -5  -3  -1    6.06    0.71 
   5  -3   1    4.52    0.88 
  -5   3   1    5.73    0.90 
   5   3   1    8.34    0.95 
  -5   3  -1    8.17    1.00 
   5   3   1    7.53    0.82 
  -5  -3   1    6.68    0.86 
   5  -3  -1    6.00    0.84 
  -5   3  -1    8.88    1.09 
  -5  -3   1    8.17    0.85 
  -5   3  -1    6.51    1.03 
   5  -3  -1    8.93    1.13 
   5  -3  -1    7.94    1.01 
  -5  -3   1    8.14    1.00 
  -5   3  -1    6.95    0.97 
   5  -3  -1    7.52    0.92 
   5   3   1    8.02    0.90 
   5   3   1    8.00    0.94 
   5  -3  -1    7.50    0.53 
  -5  -3   1    8.73    0.83 
  -5   3  -1    6.91    0.97 
   5   3   1    7.57    1.02 
   5   3   1    6.62    0.95 
   5  -3  -1    8.41    1.14 
  -5   3  -1    7.48    0.96 
   5  -3  -1    9.47    1.20 
  -5  -3   1    9.01    0.87 
  -5  -3   1    7.37    0.77 
   6   3  -1  112.38    3.25 
   6   3  -1  109.51    3.20 
  -6  -3  -1  111.74    3.27 
   6  -3   1  112.11    3.68 
   6  -3   1  113.03    3.86 
  -6   3   1  108.78    3.85 
   6  -3   1  112.41    3.63 
   6   3  -1  109.39    3.35 
  -6  -3  -1  112.57    3.40 
   6  -3   1  110.32    3.66 
   6  -3   1  108.72    3.66 
   6   3  -1  115.08    3.20 
  -6   3   1  109.44    3.44 
   6   3  -1  112.28    3.53 
  -6  -3  -1  106.15    3.34 
  -6   3   1  112.79    3.70 
  -6  -3  -1  112.32    3.38 
  -6  -3  -1  106.93    3.31 
   6   3  -1  111.89    3.17 
  -6   3   1  107.25    3.51 
  -6   3   1  109.71    3.66 
   6  -3   1  117.52    3.69 
  -6   3   1  110.11    3.61 
   6  -3  -1   89.40    3.24 
   6   3   1   96.40    3.25 
  -6  -3   1   94.76    2.86 
  -6   3  -1   94.56    3.23 
  -6   3  -1  102.88    3.43 
  -6  -3   1   99.63    2.91 
  -6  -3   1   96.90    3.03 
   6  -3  -1   91.05    3.46 
   6  -3  -1   97.49    3.28 
  -6   3  -1  101.35    3.54 
  -6  -3   1   95.52    2.89 
   6  -3  -1   93.89    3.25 
  -6   3  -1   93.23    3.26 
   6  -3  -1   96.98    3.30 
  -6   3  -1   99.80    3.41 
   6  -3  -1   95.95    3.14 
  -6   3  -1   95.14    3.30 
   6   3   1   98.09    3.03 
   6   3   1   95.50    3.00 
  -6  -3   1   92.19    2.82 
   6   3   1   97.91    3.05 
   6   3   1   92.84    2.96 
   6   3   1   94.36    2.90 
   7  -3   1   -0.86    0.99 
  -7  -3  -1    0.78    0.68 
  -7   3   1   -0.22    0.80 
  -7  -3  -1    0.51    0.70 
   7   3  -1    0.22    0.64 
   7   3  -1   -0.49    0.63 
  -7   3   1   -0.08    0.87 
  -7  -3  -1    0.00    0.76 
   7   3  -1    0.85    0.67 
  -7  -3  -1    0.64    0.72 
  -7   3   1   -0.15    1.01 
   7  -3   1   -0.07    0.92 
  -7   3   1    0.17    0.94 
  -7  -3  -1    0.32    0.67 
   7  -3   1   -0.05    0.81 
   7  -3   1   -0.70    0.86 
   7   3  -1    0.15    0.56 
   7   3  -1   -0.17    0.82 
   7   3  -1    0.42    0.58 
  -7   3   1   -0.53    0.70 
  -7   3   1   -0.08    0.85 
   7   3   1    0.08    0.91 
  -7   3  -1    1.33    1.01 
  -7   3  -1    1.64    0.90 
   7   3   1    0.34    0.63 
   7  -3  -1    1.24    0.45 
  -7   3  -1    0.53    1.04 
   7   3   1    0.87    1.11 
  -7   3  -1    0.37    0.82 
   7  -3  -1   -0.64    1.05 
   7   3   1    1.58    0.69 
   7  -3  -1   -0.36    0.82 
   7  -3  -1    1.02    1.01 
  -7  -3   1    0.56    0.68 
   7  -3  -1    0.01    0.85 
   7  -3  -1    0.83    0.89 
  -7   3  -1    0.50    0.90 
   7   3   1    0.79    0.66 
  -7  -3   1    0.12    0.72 
  -7  -3   1    0.40    0.66 
   7   3   1    1.14    0.76 
  -7  -3   1    0.13    0.63 
  -7  -3   1    0.73    0.62 
  -7   3  -1   -0.95    0.98 
   8   3  -1   27.79    2.01 
   8  -3   1   28.66    2.23 
  -8  -3  -1   32.77    1.91 
   8  -3   1   29.99    2.46 
  -8  -3  -1   27.18    1.84 
  -8   3   1   26.76    2.43 
   8   3  -1   30.04    1.65 
  -8   3   1   27.18    2.11 
   8   3  -1   31.92    1.90 
  -8   3   1   25.77    1.92 
   8  -3   1   28.18    2.16 
  -8  -3  -1   30.47    1.88 
   8   3  -1   26.94    1.68 
   8   3  -1   29.69    1.60 
  -8  -3  -1   29.45    1.85 
  -8   3   1   27.96    2.01 
  -8  -3  -1   28.94    1.75 
   8  -3   1   25.58    2.08 
   8   3  -1   26.66    2.64 
   8  -3   1   30.25    2.18 
  -8   3   1   27.04    2.11 
   8  -3   1   27.57    1.52 
  -8   3   1   31.15    2.24 
  -8   3  -1   36.37    2.39 
  -8  -3   1   34.40    1.86 
   8   3   1   31.87    1.91 
  -8   3  -1   31.34    2.49 
   8   3   1   32.57    1.91 
   8  -3  -1   29.43    2.48 
  -8  -3   1   32.95    1.79 
   8  -3  -1   32.01    2.18 
   8   3   1   31.69    1.85 
   8  -3  -1   33.35    2.17 
   8   3   1   30.65    1.82 
  -8   3  -1   30.88    2.18 
   8  -3  -1   29.74    2.15 
   8   3   1   30.67    2.17 
   8   3   1   29.14    1.80 
  -8  -3   1   34.43    1.79 
  -8   3  -1   32.18    2.23 
  -8  -3   1   31.31    1.67 
   8  -3  -1   28.89    2.07 
  -8   3  -1   29.57    2.17 
  -8  -3   1   32.34    2.00 
   8  -3  -1   32.23    1.25 
  -8   3  -1   34.24    2.34 
  -9   3   1  112.02    4.12 
   9   3  -1  121.85    3.78 
  -9  -3  -1  109.08    4.05 
   9   3  -1  110.03    3.67 
  -9   3   1  109.42    4.00 
  -9   3   1  116.83    4.27 
  -9   3   1  118.57    4.38 
   9  -3   1  115.35    4.32 
   9  -3   1  112.59    4.27 
   9   3  -1  113.49    3.64 
   9   3  -1  115.65    3.98 
   9  -3   1  115.04    4.21 
   9   3  -1  115.87    3.81 
  -9  -3  -1  122.19    3.95 
  -9   3   1  109.38    4.18 
  -9  -3  -1  115.08    3.89 
   9  -3   1  116.22    4.29 
  -9  -3  -1  107.44    3.79 
   9  -3   1  112.53    4.61 
  -9  -3  -1  112.08    3.94 
  -9  -3  -1  101.87    4.14 
   9   3  -1  117.31    4.03 
   9  -3   1  114.08    3.47 
  -9   3   1  116.30    4.64 
  -9   3  -1  104.86    4.01 
  -9   3  -1  108.31    4.08 
   9   3   1  104.35    3.63 
   9   3   1  103.24    3.69 
   9   3   1  109.55    3.74 
   9   3   1  105.90    3.68 
  -9   3  -1  109.57    4.17 
  -9  -3   1  100.84    3.87 
  -9  -3   1  107.93    3.61 
  -9  -3   1  109.99    3.60 
   9   3   1  104.14    3.75 
   9  -3  -1  108.17    2.95 
  -9  -3   1  106.10    3.80 
   9  -3  -1  105.68    4.03 
  -9  -3   1  103.71    3.49 
   9  -3  -1  104.22    4.00 
   9  -3  -1  107.49    4.02 
   9   3   1  105.55    3.91 
  -9   3  -1  108.64    4.21 
   9  -3  -1  106.30    4.10 
   9  -3  -1   99.47    4.39 
  -9  -3   1  113.31    3.67 
  -9   3  -1   93.35    4.02 
  -9   3  -1  104.83    4.40 
  10   3  -1    6.80    1.19 
  10  -3   1    5.78    1.57 
  10  -3   1    1.22    1.59 
 -10  -3  -1    3.77    1.29 
  10   3  -1    6.75    1.27 
 -10   3   1    5.58    1.81 
 -10   3   1    4.91    1.49 
  10  -3   1    3.91    1.55 
  10  -3   1    4.15    1.64 
 -10  -3  -1    7.73    1.34 
  10   3  -1    8.42    1.34 
  10   3  -1    6.15    1.09 
 -10  -3  -1    4.34    1.22 
 -10   3   1    5.87    1.52 
  10  -3   1    5.67    0.99 
 -10  -3  -1    3.27    1.52 
 -10   3   1    6.57    1.41 
 -10   3   1    5.65    1.53 
 -10  -3  -1    6.28    1.60 
  10  -3   1    5.55    1.66 
  10   3  -1    6.18    2.12 
  10   3  -1    3.97    1.35 
 -10   3   1    3.92    1.31 
 -10  -3  -1    4.32    1.23 
 -10   3  -1    2.62    1.37 
  10  -3  -1    5.58    0.66 
 -10   3  -1    5.98    1.51 
  10  -3  -1    5.62    1.59 
 -10   3  -1    3.98    1.54 
 -10   3  -1    5.33    1.73 
 -10  -3   1    7.14    1.25 
 -10  -3   1    6.68    1.29 
  10   3   1    3.70    1.32 
  10   3   1    6.07    1.26 
 -10  -3   1    4.01    1.36 
 -10  -3   1    5.44    1.16 
  10  -3  -1    3.00    1.55 
  10  -3  -1    2.04    1.66 
 -10   3  -1    2.79    1.43 
  10   3   1    6.24    1.37 
 -10   3  -1    7.57    1.64 
  10   3   1    2.98    1.33 
 -10  -3   1    4.09    1.11 
 -10  -3   1    5.00    1.33 
  10   3   1    3.67    1.21 
  10  -3  -1    4.38    1.44 
  10   3   1    4.84    1.16 
  11  -3   1   15.39    1.59 
  11  -3   1   12.21    1.96 
  11  -3   1   10.36    2.23 
 -11   3   1   11.14    1.99 
 -11   3   1   13.81    1.87 
  11   3  -1   11.71    1.75 
  11   3  -1   12.90    1.81 
 -11  -3  -1   12.29    1.70 
 -11  -3  -1   11.77    1.60 
 -11   3   1   14.22    2.13 
  11   3  -1   11.64    1.45 
 -11   3   1   10.38    1.89 
 -11  -3  -1   13.06    1.93 
 -11  -3  -1   13.30    2.00 
  11   3  -1   14.41    1.92 
 -11   3   1   17.05    2.36 
 -11  -3  -1   19.35    2.39 
  11   3  -1   16.44    2.15 
 -11   3   1   12.18    1.87 
  11  -3   1   12.73    2.19 
 -11  -3  -1   14.17    1.75 
  11   3  -1   16.99    2.36 
  11   3   1   11.86    1.57 
 -11  -3   1   15.86    2.16 
 -11   3  -1   11.24    2.00 
 -11   3  -1   11.43    1.87 
 -11  -3   1   13.30    1.53 
 -11  -3   1   14.31    1.64 
 -11   3  -1   10.83    1.89 
  11   3   1   14.52    1.78 
  11  -3  -1   10.90    2.85 
 -11   3  -1   15.02    2.24 
  11   3   1   12.79    1.80 
  11   3   1   14.05    1.88 
  11   3   1   10.58    1.72 
  11  -3  -1   17.33    2.42 
 -11   3  -1   13.89    2.12 
 -11   3  -1   13.43    2.14 
  11  -3  -1   15.31    2.11 
 -11  -3   1   13.32    1.59 
 -11  -3   1   15.02    1.79 
 -11  -3   1   12.61    1.88 
  11  -3  -1   11.42    3.39 
 -12  -3  -1   12.84    2.50 
 -12   3   1   14.22    2.15 
 -12  -3  -1   12.36    1.90 
  12   3  -1   12.68    1.78 
 -12  -3  -1   12.20    1.89 
 -12   3   1   11.35    2.07 
 -12  -3  -1   13.24    1.87 
 -12  -3  -1   13.30    1.94 
  12   3  -1   12.94    1.93 
  12   3  -1   13.35    1.86 
 -12   3   1   13.28    2.25 
 -12   3   1   15.39    2.59 
  12  -3   1   16.11    1.71 
 -12  -3  -1    9.67    2.34 
  12  -3   1   11.14    2.70 
  12  -3   1   16.23    2.37 
  12   3  -1   12.32    2.05 
 -12   3   1   16.24    2.40 
  12  -3   1    8.05    2.27 
 -12   3   1   24.29    3.24 
  12   3  -1   13.49    2.08 
  12  -3  -1   10.66    2.05 
 -12   3  -1   17.65    2.54 
  12   3   1   16.11    2.12 
 -12  -3   1   12.70    2.22 
  12   3   1   13.49    2.07 
 -12   3  -1   16.68    2.50 
 -12  -3   1   15.14    1.95 
  12   3   1   17.57    2.18 
 -12  -3   1   15.47    1.91 
  12  -3  -1   17.02    2.46 
 -12   3  -1   16.22    2.47 
  12   3   1   12.78    2.14 
 -12  -3   1   12.73    1.77 
 -12   3  -1   13.61    2.29 
 -12  -3   1   17.01    2.08 
 -12   3  -1   13.34    2.30 
 -12  -3   1   17.35    1.85 
  12  -3  -1   13.12    3.27 
 -12   3  -1   14.49    2.45 
 -13  -3  -1    2.64    1.77 
  13   3  -1    6.51    2.01 
 -13   3   1    4.56    2.16 
 -13   3   1    3.37    2.56 
  13  -3   1    3.38    2.52 
 -13   3   1    2.80    2.31 
 -13   3   1   -4.54    2.24 
 -13  -3  -1    3.60    1.83 
 -13   3  -1    3.29    2.25 
 -13  -3   1    4.54    1.72 
 -13   3  -1    1.47    2.62 
  13   3   1    2.66    2.05 
  13  -3  -1    4.28    2.50 
 -13  -3   1    3.90    1.73 
 -13  -3   1    3.82    1.98 
 -13   3  -1    3.26    2.31 
   0  -4   1   71.75    2.23 
   0   4  -1   73.68    2.25 
   0  -4  -1   73.34    2.10 
   0  -4   1   71.77    2.19 
   0   4  -1   73.17    2.09 
   0  -4   1   71.08    2.09 
   0  -4   1   73.15    2.15 
   0  -4  -1   73.34    2.24 
   0  -4  -1   73.99    2.19 
   0   4  -1   69.43    2.08 
   0   4   1   74.69    2.19 
   0   4   1   75.84    2.12 
   0  -4  -1   74.18    2.17 
   0   4   1   70.74    2.17 
   0  -4   1   70.77    2.10 
   0   4  -1   73.20    2.20 
   0  -4  -1   74.56    2.19 
   0  -4   1   74.35    2.12 
   0   4   1   74.07    2.20 
   0  -4  -1   72.93    2.15 
   0  -4   1   72.95    2.10 
   0  -4  -1   74.88    2.20 
   0   4  -1   64.02    2.25 
   0   4  -1   63.41    2.24 
   0   4   1   72.14    2.15 
  -1   4   1   31.90    1.30 
  -1  -4  -1   31.25    1.20 
   1   4  -1   30.70    1.07 
   1  -4   1   32.67    1.30 
   1  -4   1   31.89    1.35 
  -1  -4  -1   29.29    1.31 
   1   4  -1   33.65    1.37 
   1  -4   1   31.25    1.23 
  -1   4   1   30.48    1.23 
  -1   4   1   29.65    1.23 
  -1  -4  -1   30.59    1.00 
   1  -4   1   33.14    1.36 
  -1   4   1   31.53    1.28 
  -1  -4  -1   32.48    1.20 
  -1   4   1   31.79    1.34 
  -1   4   1   33.48    1.36 
  -1  -4  -1   31.49    1.20 
   1  -4   1   30.75    1.21 
   1  -4   1   30.81    1.26 
  -1   4   1   32.04    1.19 
   1   4  -1   31.66    1.07 
   1   4  -1   31.29    1.06 
  -1  -4  -1   30.73    1.20 
   1  -4   1   32.61    1.25 
  -1  -4   1   22.80    1.15 
   1   4   1   22.42    1.15 
  -1   4  -1   22.82    1.11 
  -1  -4   1   23.44    1.17 
   1  -4  -1   23.72    1.08 
   1  -4  -1   23.21    1.12 
  -1   4  -1   22.79    1.07 
  -1  -4   1   23.13    0.90 
   1   4   1   19.64    0.99 
  -1   4  -1   21.54    1.10 
   1   4   1   22.27    0.98 
  -1   4  -1   23.05    1.02 
   1  -4  -1   20.88    1.05 
  -1   4  -1   23.86    1.13 
   1  -4  -1   24.36    1.11 
   1  -4  -1   25.13    1.17 
   1   4   1   21.97    0.98 
  -1   4  -1   24.76    1.20 
   1  -4  -1   23.12    0.98 
  -1  -4   1   23.26    0.89 
  -1  -4   1   23.81    0.91 
   1   4   1   22.43    0.82 
   1  -4  -1   23.10    1.12 
  -1  -4   1   23.24    0.90 
   2  -4   1  323.19    8.08 
   2  -4   1  326.29    8.16 
  -2  -4  -1  310.99    7.87 
  -2   4   1  315.16    8.13 
   2  -4   1  315.07    8.04 
  -2   4   1  315.58    7.95 
  -2  -4  -1  312.30    7.87 
  -2   4   1  320.90    8.09 
   2   4  -1  314.32    7.71 
   2  -4   1  311.96    8.05 
  -2  -4  -1  309.56    7.87 
  -2   4   1  309.14    7.76 
   2  -4   1  316.49    8.06 
  -2   4   1  319.93    8.08 
  -2   4   1  322.75    8.06 
   2  -4   1  319.36    8.06 
  -2  -4  -1  315.64    8.07 
  -2  -4  -1  307.13    7.86 
   2   4  -1  316.76    7.72 
  -2   4   1  319.75    8.05 
   2   4  -1  313.44    7.73 
   2   4  -1  316.27    8.07 
  -2   4  -1  310.70    7.65 
   2  -4  -1  300.54    7.60 
  -2  -4   1  294.13    7.29 
  -2   4  -1  303.46    7.60 
  -2   4  -1  293.80    7.59 
  -2   4  -1  296.11    7.57 
   2   4   1  298.40    7.43 
   2   4   1  300.69    7.64 
   2   4   1  296.14    7.42 
   2  -4  -1  302.67    7.54 
  -2  -4   1  301.40    7.62 
   2   4   1  289.21    7.41 
   2  -4  -1  299.76    7.62 
  -2   4  -1  293.43    7.62 
  -2  -4   1  289.84    7.27 
  -2   4  -1  293.94    7.68 
   2  -4  -1  302.39    7.64 
  -2  -4   1  296.24    7.26 
   2  -4  -1  288.52    7.60 
   2  -4  -1  295.70    7.67 
   2  -4  -1  297.31    7.31 
  -2  -4   1  288.09    7.27 
   3   4  -1   21.56    0.82 
  -3   4   1   21.72    1.30 
   3   4  -1   22.74    0.86 
   3   4  -1   21.63    0.83 
  -3  -4  -1   22.01    1.05 
  -3  -4  -1   22.62    1.02 
   3   4  -1   23.87    1.39 
  -3   4   1   21.38    1.22 
  -3   4   1   22.35    1.13 
  -3   4   1   22.73    1.49 
   3  -4   1   21.54    1.23 
  -3  -4  -1   21.83    1.32 
   3  -4   1   23.80    1.34 
   3  -4   1   22.51    1.30 
  -3  -4  -1   23.77    1.06 
  -3   4   1   20.68    1.19 
   3  -4   1   21.90    1.31 
  -3   4   1   22.67    1.38 
   3  -4   1   21.76    1.45 
   3  -4   1   21.61    1.27 
  -3  -4  -1   20.51    1.01 
   3  -4  -1   21.79    1.18 
  -3   4  -1   20.28    1.28 
   3  -4  -1   20.30    1.21 
  -3   4  -1   21.73    1.37 
   3  -4  -1   21.81    1.34 
  -3  -4   1   20.31    0.81 
  -3   4  -1   21.81    1.50 
  -3   4  -1   22.95    1.29 
  -3   4  -1   22.37    1.23 
  -3  -4   1   21.16    0.95 
  -3   4  -1   21.30    1.24 
   3   4   1   20.46    1.02 
  -3  -4   1   21.61    0.85 
  -3  -4   1   22.09    0.85 
   3  -4  -1   21.82    1.39 
   3  -4  -1   21.32    0.81 
  -3  -4   1   20.80    0.85 
   3   4   1   21.46    1.02 
   3  -4  -1   21.51    1.30 
   3   4   1   19.94    1.00 
   3   4   1   21.45    1.00 
   3  -4  -1   22.10    1.36 
  -3  -4   1   20.67    1.27 
   3   4   1   21.27    1.37 
  -4  -4  -1   11.88    0.94 
  -4   4   1   13.68    1.09 
   4  -4   1   12.73    1.37 
  -4   4   1   12.40    1.25 
  -4   4   1   13.54    1.38 
   4  -4   1   10.22    1.34 
   4  -4   1   12.95    1.30 
   4   4  -1   11.13    0.72 
  -4  -4  -1   13.26    1.26 
  -4   4   1   12.72    1.36 
   4  -4   1   11.18    1.22 
   4  -4   1   14.79    1.31 
   4   4  -1   11.54    0.75 
   4   4  -1   12.53    1.28 
  -4  -4  -1   12.96    1.02 
  -4  -4  -1   13.11    0.63 
  -4  -4  -1   11.60    0.91 
  -4   4   1   11.98    1.53 
  -4  -4  -1   12.77    1.01 
   4   4  -1   12.13    0.72 
   4  -4   1   12.44    1.48 
  -4   4   1   13.31    1.27 
  -4  -4   1    6.36    0.65 
   4   4   1    6.33    0.84 
   4  -4  -1    7.80    0.86 
  -4  -4   1    7.29    0.92 
  -4   4  -1    8.27    0.99 
   4   4   1    7.46    0.86 
  -4   4  -1    7.94    1.03 
   4  -4  -1    6.75    0.92 
  -4   4  -1    7.32    1.08 
   4  -4  -1    7.45    1.00 
  -4  -4   1    7.55    0.80 
   4   4   1    6.25    0.82 
  -4  -4   1    7.02    0.69 
  -4  -4   1    7.38    0.69 
   4  -4  -1    6.10    0.90 
  -4   4  -1    8.83    1.22 
  -4   4  -1    7.26    0.88 
   4  -4  -1    7.64    0.52 
   4  -4  -1    6.09    0.85 
  -4   4  -1    6.22    0.92 
   4   4   1    6.56    0.83 
  -4  -4   1    8.56    0.72 
   4   4   1    7.98    0.53 
   4   4   1    8.37    1.03 
   4  -4  -1    6.58    0.99 
  -5  -4  -1   53.33    1.94 
  -5  -4  -1   54.77    1.94 
   5   4  -1   53.26    1.75 
   5   4  -1   53.76    2.25 
   5  -4   1   52.09    2.23 
   5  -4   1   53.59    2.34 
   5  -4   1   51.86    2.25 
  -5   4   1   51.91    2.07 
   5  -4   1   51.49    2.43 
  -5   4   1   52.14    2.32 
  -5  -4  -1   56.87    1.71 
  -5   4   1   54.13    2.33 
   5   4  -1   53.41    1.82 
   5  -4   1   55.66    2.24 
   5   4  -1   54.38    1.70 
  -5  -4  -1   51.26    1.90 
  -5   4   1   50.84    2.13 
  -5   4   1   52.79    2.52 
   5  -4   1   53.86    2.32 
  -5   4   1   52.99    2.22 
  -5  -4  -1   54.04    1.89 
   5   4  -1   54.35    1.72 
  -5   4  -1   44.30    2.08 
  -5   4  -1   46.56    2.07 
  -5  -4   1   48.12    1.61 
   5  -4  -1   45.16    2.08 
   5   4   1   42.48    1.70 
  -5  -4   1   46.56    1.61 
   5   4   1   45.67    1.50 
  -5   4  -1   43.42    2.08 
   5  -4  -1   49.78    2.14 
  -5   4  -1   47.27    2.23 
   5   4   1   44.57    1.74 
   5   4   1   46.44    1.73 
   5  -4  -1   42.83    2.03 
  -5  -4   1   45.41    1.68 
  -5  -4   1   48.28    1.58 
   5  -4  -1   48.25    2.05 
  -5   4  -1   48.86    2.23 
   5  -4  -1   46.53    2.32 
  -5  -4   1   43.79    1.53 
   5   4   1   48.46    2.14 
   5  -4  -1   46.22    1.97 
  -5   4  -1   48.89    2.35 
  -5  -4   1   42.54    1.99 
  -6   4   1   32.04    1.74 
  -6  -4  -1   29.38    1.50 
  -6   4   1   29.82    1.82 
   6  -4   1   26.98    2.95 
  -6  -4  -1   31.84    1.34 
  -6   4   1   29.22    1.98 
   6   4  -1   30.71    1.45 
   6   4  -1   30.35    1.85 
  -6   4   1   30.48    2.17 
   6  -4   1   28.83    1.84 
   6   4  -1   30.31    1.38 
  -6   4   1   30.50    1.69 
   6   4  -1   29.51    1.31 
  -6  -4  -1   34.12    1.58 
  -6  -4  -1   29.32    1.45 
   6  -4   1   29.33    1.87 
   6  -4   1   29.66    2.02 
  -6  -4  -1   31.37    1.54 
   6   4  -1   29.64    1.34 
  -6   4   1   30.14    1.84 
   6   4  -1   30.59    1.29 
   6  -4   1   32.06    1.95 
   6  -4   1   33.18    1.87 
  -6  -4   1   30.84    1.34 
   6  -4  -1   32.88    1.96 
  -6   4  -1   31.45    1.90 
  -6   4  -1   31.65    2.00 
  -6  -4   1   32.56    1.53 
  -6   4  -1   28.95    1.75 
  -6   4  -1   31.29    2.01 
   6   4   1   33.72    1.99 
   6   4   1   31.96    1.34 
  -6  -4   1   32.72    1.44 
   6   4   1   34.54    1.65 
  -6  -4   1   31.45    1.41 
   6   4   1   27.76    2.26 
  -6   4  -1   36.25    2.23 
   6  -4  -1   31.53    1.76 
   6  -4  -1   26.23    2.84 
   6  -4  -1   32.33    1.89 
   6   4   1   31.96    1.51 
  -6  -4   1   32.01    1.38 
   6   4   1   32.52    1.56 
   6  -4  -1   29.57    0.98 
  -6  -4   1   30.45    1.76 
   6  -4  -1   30.53    2.11 
  -6   4  -1   28.71    1.82 
   6  -4  -1   30.56    1.93 
  -7   4   1   35.48    2.08 
  -7   4   1   37.20    2.20 
  -7  -4  -1   32.86    1.76 
  -7   4   1   32.24    2.14 
   7   4  -1   31.22    1.55 
  -7  -4  -1   31.52    1.64 
  -7   4   1   30.78    1.89 
   7  -4   1   36.22    2.12 
   7  -4   1   35.94    2.41 
  -7   4   1   32.43    2.01 
   7   4  -1   30.91    1.46 
  -7  -4  -1   33.71    1.58 
   7  -4   1   34.07    2.14 
   7   4  -1   33.25    1.52 
   7   4  -1   34.23    1.59 
   7  -4   1   31.61    2.12 
  -7  -4  -1   30.63    1.73 
   7  -4   1   31.23    2.14 
   7  -4   1   31.84    2.04 
  -7  -4  -1   34.67    1.73 
   7   4  -1   31.33    1.64 
  -7   4   1   28.92    2.39 
   7   4  -1   30.30    2.01 
   7  -4  -1   26.01    2.25 
  -7  -4   1   31.32    1.68 
  -7  -4   1   29.32    1.47 
  -7   4  -1   25.97    2.00 
   7   4   1   29.23    1.48 
  -7   4  -1   31.58    2.18 
  -7  -4   1   32.32    1.58 
  -7  -4   1   29.54    1.44 
   7  -4  -1   30.18    2.08 
   7  -4  -1   35.96    1.99 
   7  -4  -1   29.97    2.07 
  -7   4  -1   28.89    1.96 
   7   4   1   26.56    2.00 
  -7   4  -1   28.63    2.04 
   7  -4  -1   31.23    2.01 
   7   4   1   25.32    2.02 
  -7   4  -1   31.50    2.37 
  -7  -4   1   30.55    1.54 
   7   4   1   35.48    1.76 
   7   4   1   33.36    1.66 
   7  -4  -1   28.56    1.99 
   7   4   1   28.37    1.58 
  -7   4  -1   33.03    2.23 
   8   4  -1   14.43    1.37 
  -8   4   1   11.28    1.37 
  -8   4   1   12.06    1.46 
  -8  -4  -1   12.10    1.53 
  -8  -4  -1   16.94    1.60 
   8   4  -1   15.39    1.88 
   8   4  -1   14.81    1.27 
  -8   4   1   16.38    2.37 
   8  -4   1   15.24    1.72 
  -8  -4  -1   17.33    1.58 
  -8  -4  -1   14.82    1.49 
   8  -4   1   12.31    1.54 
  -8   4   1   14.85    1.74 
   8  -4   1   15.06    1.99 
  -8   4   1   15.13    2.01 
   8   4  -1   14.60    1.48 
   8  -4   1   14.13    1.61 
  -8  -4  -1   14.52    1.41 
  -8   4   1   17.04    2.06 
   8   4  -1   13.40    1.44 
   8   4  -1   13.79    1.30 
   8  -4   1   13.12    1.74 
   8   4   1   13.15    1.35 
  -8  -4   1   13.55    1.39 
  -8  -4   1   10.91    1.25 
   8  -4  -1   14.38    1.67 
  -8   4  -1   13.12    1.82 
   8  -4  -1   15.35    1.87 
  -8  -4   1   12.34    1.40 
   8  -4  -1   12.77    1.56 
   8   4   1   13.85    1.48 
  -8   4  -1   13.22    1.63 
   8   4   1   16.30    1.58 
   8   4   1   14.20    1.95 
   8   4   1   13.07    1.52 
   8  -4  -1   13.47    1.84 
   8  -4  -1   11.41    1.73 
  -8   4  -1   16.95    1.95 
  -8  -4   1   14.49    1.44 
  -8   4  -1   14.92    1.75 
  -8   4  -1   13.07    1.67 
  -8  -4   1   13.51    1.55 
   8   4   1   11.73    1.42 
  -9   4   1   15.83    2.20 
   9  -4   1   17.30    1.34 
   9  -4   1   17.12    2.29 
   9   4  -1   14.46    1.60 
   9  -4   1   14.47    1.77 
  -9  -4  -1   19.83    1.73 
   9   4  -1   15.32    1.44 
  -9   4   1   14.91    1.63 
  -9   4   1   14.24    1.71 
   9   4  -1   15.10    1.77 
  -9   4   1   16.29    1.83 
  -9   4   1   16.22    2.86 
   9   4  -1   14.93    2.07 
   9  -4   1   13.95    1.83 
   9   4  -1   18.52    2.13 
   9   4  -1   14.78    1.51 
   9  -4   1   16.82    2.27 
  -9  -4  -1   16.28    1.64 
  -9   4   1   18.18    2.62 
  -9  -4  -1   16.26    1.77 
   9  -4   1   13.36    1.90 
   9  -4  -1   13.55    1.78 
  -9  -4   1   17.59    1.61 
   9  -4  -1   13.28    1.60 
   9  -4  -1   16.08    2.17 
   9   4   1   18.09    2.21 
   9   4   1   15.85    1.73 
  -9   4  -1   17.27    2.32 
  -9  -4   1   16.59    1.87 
   9  -4  -1   16.12    2.05 
  -9  -4   1   14.83    1.44 
   9   4   1   18.63    1.68 
  -9   4  -1   17.23    2.26 
   9   4   1   14.12    1.82 
   9   4   1   15.38    1.66 
  -9   4  -1   19.72    2.68 
  -9  -4   1   15.18    1.60 
  -9   4  -1   16.89    2.15 
   9  -4  -1   17.07    2.24 
   9   4   1   18.05    1.79 
  -9  -4   1   16.43    1.68 
  -9   4  -1   12.23    1.64 
 -10  -4  -1   19.09    2.52 
  10   4  -1   22.14    3.06 
 -10  -4  -1   18.50    2.02 
  10  -4   1   22.37    2.69 
 -10  -4  -1   17.06    1.84 
  10   4  -1   17.54    1.68 
  10  -4   1   19.82    2.26 
  10  -4   1   24.72    2.69 
 -10   4   1   19.66    2.10 
 -10   4   1   18.68    2.47 
  10   4  -1   17.65    2.09 
 -10   4   1   20.55    2.52 
 -10  -4  -1   21.14    2.05 
  10  -4   1   18.64    2.20 
  10  -4   1   11.69    2.03 
  10   4  -1   20.36    1.79 
 -10   4   1   20.15    2.49 
 -10  -4  -1   17.58    2.08 
 -10   4   1   18.29    2.27 
  10   4  -1   20.70    2.01 
  10   4  -1   20.19    2.38 
 -10  -4  -1   16.66    1.97 
  10  -4   1   16.32    1.41 
 -10   4   1   23.83    3.03 
 -10   4  -1   12.73    1.86 
  10   4   1   16.08    1.89 
 -10   4  -1   17.06    2.12 
  10   4   1   16.22    1.89 
  10   4   1   15.88    2.00 
 -10   4  -1   11.49    1.72 
 -10  -4   1   18.01    1.79 
 -10  -4   1   20.34    1.86 
 -10  -4   1   13.84    1.75 
  10   4   1   15.69    2.01 
  10   4   1   17.13    2.04 
 -10  -4   1   17.16    1.88 
  10  -4  -1   18.11    2.55 
  10  -4  -1   20.06    2.54 
 -10   4  -1   16.68    2.14 
  10  -4  -1   13.87    1.82 
  10  -4  -1   17.18    2.06 
 -10   4  -1   18.21    2.47 
 -10  -4   1   16.84    1.70 
 -10   4  -1   18.22    2.78 
 -10  -4   1   21.37    2.16 
  10  -4  -1   15.94    2.21 
  10   4   1   17.92    1.97 
 -11  -4  -1   11.36    1.64 
  11   4  -1   16.70    2.14 
  11  -4   1   11.35    1.39 
  11   4  -1   11.83    1.85 
 -11  -4  -1   10.44    2.03 
 -11  -4  -1   10.54    1.57 
 -11   4   1   13.37    2.37 
 -11  -4  -1   10.85    1.60 
  11  -4   1   16.51    2.35 
  11   4  -1   12.14    1.89 
 -11   4   1   10.31    1.96 
 -11  -4  -1   13.30    1.61 
  11   4  -1   13.95    1.43 
 -11   4   1   19.81    2.66 
 -11   4   1   11.86    2.04 
  11   4  -1   12.04    1.65 
  11  -4   1   11.99    2.15 
 -11   4   1   12.22    1.83 
  11   4  -1   14.47    1.78 
 -11  -4  -1   13.95    1.82 
 -11   4   1   12.15    2.09 
  11  -4   1   10.90    2.30 
  11  -4  -1   12.30    2.27 
 -11  -4   1   13.98    1.61 
 -11   4  -1   13.14    2.23 
  11   4   1   10.63    1.60 
 -11  -4   1    9.86    1.49 
 -11  -4   1   11.28    1.43 
  11  -4  -1    9.89    1.92 
 -11   4  -1   12.43    2.19 
 -11  -4   1   11.85    1.47 
  11   4   1   14.25    1.95 
  11  -4  -1   10.70    2.10 
  11   4   1   12.26    1.57 
 -11   4  -1   13.70    2.07 
 -11  -4   1   11.49    1.88 
 -11   4  -1   12.59    2.12 
 -11   4  -1   13.50    2.24 
  11   4   1   10.75    1.76 
 -11  -4   1   12.66    1.69 
 -11   4  -1   10.00    1.95 
  11   4   1   12.35    1.74 
 -12   4   1   10.81    2.36 
  12  -4   1   13.86    2.42 
  12  -4   1   12.87    1.39 
 -12   4   1   16.21    2.45 
  12   4  -1   13.36    2.04 
  12   4  -1   11.53    1.93 
 -12  -4  -1   19.80    2.70 
 -12  -4  -1    9.07    2.69 
  12   4  -1   15.31    1.98 
 -12  -4  -1   12.41    1.81 
  12   4  -1   15.61    2.12 
  12   4  -1   15.85    2.01 
  12  -4   1   16.06    2.54 
 -12   4   1   13.90    2.67 
 -12   4   1   12.32    2.14 
 -12  -4  -1   10.89    1.86 
 -12   4   1   11.66    2.32 
 -12   4  -1   16.40    2.59 
 -12  -4   1   14.74    2.29 
 -12   4  -1   17.28    2.41 
  12   4   1   17.70    2.02 
  12  -4  -1   18.48    2.58 
 -12   4  -1   14.90    2.49 
  12   4   1   19.80    2.67 
 -12   4  -1   17.00    2.51 
 -12   4  -1   16.41    2.69 
 -12  -4   1   19.26    2.58 
 -12  -4   1   17.84    2.04 
  12  -4  -1   15.81    2.63 
 -12   4  -1   13.14    3.36 
 -12  -4   1   19.97    2.48 
 -12  -4   1   17.53    2.26 
  12   4   1   21.46    3.03 
 -13   4   1   10.59    2.80 
 -13   4   1   10.42    2.74 
 -13   4   1   13.66    2.75 
 -13   4   1   16.40    2.64 
 -13  -4  -1    9.62    2.01 
 -13  -4  -1   12.86    2.03 
  13  -4   1    8.65    2.76 
  13   4  -1   15.19    2.49 
 -13   4  -1   10.00    2.92 
 -13   4  -1   10.00    2.48 
 -13  -4   1    7.92    1.81 
 -13   4  -1   11.89    2.71 
  13  -4  -1    7.53    2.66 
 -13  -4   1   12.72    1.92 
 -13  -4   1   16.27    2.13 
   0   5   1   47.82    1.73 
   0  -5  -1   46.32    1.68 
   0   5  -1   47.41    1.75 
   0  -5   1   47.03    1.67 
   0  -5  -1   46.37    1.69 
   0  -5   1   47.58    1.61 
   0  -5   1   46.83    1.61 
   0   5  -1   47.60    1.77 
   0  -5   1   47.86    1.80 
   0  -5  -1   46.19    1.60 
   0   5   1   49.18    1.72 
   0   5  -1   49.11    1.65 
   0   5  -1   47.01    1.60 
   0  -5   1   49.07    1.63 
   0  -5  -1   47.29    1.65 
   0  -5   1   47.94    1.74 
   0  -5  -1   48.44    1.72 
   0  -5  -1   48.90    1.80 
   0   5   1   47.46    1.62 
   0  -5   1   47.12    1.61 
   0   5  -1   40.28    1.55 
   0   5   1   46.60    1.69 
   0  -5  -1   47.54    1.70 
   0   5  -1   44.78    1.58 
   0   5   1   45.97    1.65 
  -1   5   1  341.94    8.72 
  -1   5   1  353.60    8.75 
   1   5  -1  343.26    8.74 
  -1  -5  -1  341.65    8.42 
  -1  -5  -1  338.79    8.75 
  -1   5   1  340.05    8.69 
   1  -5   1  343.68    8.62 
   1  -5   1  344.17    8.69 
   1  -5   1  359.26    8.71 
   1   5  -1  341.81    8.49 
  -1  -5  -1  350.91    8.74 
   1  -5   1  351.28    8.67 
  -1  -5  -1  341.01    8.61 
  -1   5   1  341.66    8.68 
  -1   5   1  342.59    8.70 
  -1   5   1  340.21    8.57 
  -1  -5  -1  342.22    8.59 
  -1  -5  -1  346.65    8.62 
   1   5  -1  302.68    8.48 
   1  -5   1  344.18    8.76 
   1   5  -1  338.62    8.50 
   1  -5   1  348.63    8.67 
  -1   5   1  339.86    8.68 
   1  -5   1  349.52    8.75 
   1  -5  -1  355.28    8.89 
   1   5   1  347.07    8.78 
   1  -5  -1  350.98    8.90 
  -1   5  -1  359.95    8.86 
  -1  -5   1  351.35    8.95 
  -1  -5   1  348.24    8.68 
   1  -5  -1  350.79    8.89 
   1  -5  -1  358.02    8.77 
  -1  -5   1  344.62    8.69 
  -1  -5   1  351.03    8.69 
  -1   5  -1  355.02    8.84 
  -1  -5   1  351.85    8.92 
   1   5   1  348.90    8.79 
  -1   5  -1  327.80    9.06 
   1  -5  -1  353.12    8.89 
  -1  -5   1  351.23    8.67 
   1   5   1  340.03    8.78 
   1   5   1  349.78    8.78 
   1  -5  -1  356.44    8.91 
   1  -5  -1  362.88    8.93 
  -1   5  -1  352.83    8.93 
  -1  -5   1  347.43    8.69 
   1   5   1  340.17    8.64 
  -1   5  -1  353.85    8.88 
  -1   5  -1  352.19    8.93 
   1   5   1  352.60    8.92 
   2  -5   1   29.64    1.53 
   2   5  -1   30.34    1.11 
  -2   5   1   31.35    1.49 
   2   5  -1   30.44    1.13 
  -2   5   1   34.01    1.56 
   2  -5   1   30.59    1.50 
  -2   5   1   34.68    1.63 
  -2  -5  -1   31.36    0.93 
   2   5  -1   32.01    1.13 
  -2  -5  -1   31.50    1.55 
   2  -5   1   33.96    1.54 
  -2  -5  -1   31.40    1.29 
   2  -5   1   30.71    1.43 
  -2  -5  -1   30.59    1.27 
  -2   5   1   31.16    1.43 
  -2   5   1   31.75    1.40 
   2  -5   1   31.84    1.52 
  -2   5   1   33.25    1.51 
  -2   5   1   31.36    1.23 
   2  -5   1   31.05    1.30 
  -2  -5  -1   31.15    1.28 
   2   5  -1   30.59    1.57 
   2  -5   1   29.81    1.45 
   2   5  -1   30.78    1.14 
  -2  -5  -1   29.68    1.28 
  -2   5  -1   36.58    1.60 
  -2  -5   1   32.37    1.20 
   2  -5  -1   32.94    1.55 
  -2   5  -1   32.41    1.64 
  -2   5  -1   30.68    1.50 
   2   5   1   34.82    1.64 
  -2  -5   1   34.52    1.60 
   2  -5  -1   34.15    1.61 
   2   5   1   33.15    1.30 
  -2   5  -1   32.74    1.51 
   2  -5  -1   33.85    1.50 
  -2  -5   1   34.89    1.21 
  -2   5  -1   33.53    1.51 
   2  -5  -1   31.95    1.25 
   2  -5  -1   34.68    1.57 
  -2  -5   1   32.57    1.57 
  -2   5  -1   32.72    1.49 
  -2  -5   1   33.89    1.19 
  -2  -5   1   32.89    1.18 
   2   5   1   33.19    1.31 
   2  -5  -1   34.26    1.52 
   2  -5  -1   34.17    1.60 
  -3   5   1  318.73    8.63 
  -3   5   1  324.66    8.49 
  -3   5   1  328.91    8.39 
  -3  -5  -1  328.06    8.55 
  -3   5   1  332.51    8.58 
   3   5  -1  333.24    8.05 
   3  -5   1  323.51    8.53 
   3  -5   1  325.96    8.64 
   3   5  -1  329.50    8.08 
   3  -5   1  324.26    8.53 
   3   5  -1  334.12    8.55 
  -3  -5  -1  325.18    8.24 
  -3  -5  -1  327.15    8.24 
   3  -5   1  324.77    8.20 
  -3   5   1  329.57    8.51 
   3   5  -1  323.76    8.05 
  -3   5   1  326.64    8.56 
   3  -5   1  335.69    8.56 
   3  -5   1  332.46    8.52 
  -3  -5  -1  323.08    8.23 
   3  -5   1  330.26    8.51 
  -3  -5  -1  319.39    8.23 
   3  -5  -1  329.48    8.53 
   3   5   1  313.60    8.23 
   3   5   1  317.47    8.21 
   3  -5  -1  336.53    8.67 
   3   5   1  327.74    8.55 
  -3   5  -1  335.59    8.54 
  -3  -5   1  328.27    8.07 
   3   5   1  335.84    8.23 
  -3  -5   1  316.69    8.03 
   3  -5  -1  325.26    8.07 
  -3   5  -1  329.85    8.56 
  -3   5  -1  335.15    8.50 
  -3   5  -1  328.15    8.55 
   3  -5  -1  335.90    8.57 
  -3  -5   1  323.89    8.07 
   3   5   1  333.46    8.25 
  -3   5  -1  318.88    8.47 
   3  -5  -1  336.00    8.56 
  -3  -5   1  324.22    8.51 
   3  -5  -1  325.43    8.40 
   3  -5  -1  332.35    8.53 
  -3  -5   1  308.94    8.07 
  -3   5  -1  320.24    8.64 
  -4  -5  -1   47.76    2.12 
  -4   5   1   49.66    2.17 
  -4   5   1   48.18    2.34 
   4  -5   1   48.49    2.10 
  -4  -5  -1   44.94    1.72 
   4  -5   1   46.82    2.27 
   4  -5   1   47.80    2.07 
  -4  -5  -1   45.21    1.68 
   4  -5   1   47.93    2.05 
  -4   5   1   48.96    2.11 
   4  -5   1   49.46    2.20 
   4   5  -1   49.22    1.56 
   4   5  -1   49.64    2.19 
  -4   5   1   47.35    1.92 
  -4   5   1   50.00    2.21 
  -4   5   1   45.60    2.05 
  -4  -5  -1   47.38    1.75 
  -4  -5  -1   49.16    1.78 
   4   5  -1   47.71    1.50 
   4  -5   1   51.10    2.20 
   4   5  -1   47.22    1.51 
   4  -5  -1   45.01    2.04 
   4   5   1   43.25    1.65 
  -4   5  -1   45.25    2.08 
   4  -5  -1   42.73    1.96 
   4   5   1   43.81    2.10 
   4   5   1   43.87    1.63 
   4  -5  -1   44.54    1.87 
  -4   5  -1   43.33    2.27 
  -4   5  -1   44.95    2.03 
   4  -5  -1   42.84    2.20 
   4   5   1   43.38    1.63 
  -4  -5   1   43.59    1.48 
   4  -5  -1   44.06    2.08 
  -4  -5   1   42.91    1.99 
  -4   5  -1   41.72    1.92 
   4  -5  -1   41.80    1.96 
   4   5   1   46.20    1.68 
  -4  -5   1   43.43    1.45 
  -4  -5   1   45.64    1.50 
  -4  -5   1   44.44    1.47 
  -4  -5   1   41.61    1.41 
   4  -5  -1   43.38    1.37 
  -4   5  -1   43.51    2.02 
  -4   5  -1   46.57    2.05 
  -5   5   1   33.66    1.96 
   5   5  -1   32.16    1.21 
  -5   5   1   28.86    1.69 
  -5  -5  -1   29.27    1.44 
  -5  -5  -1   31.56    1.42 
  -5   5   1   32.19    1.67 
  -5  -5  -1   29.31    1.44 
   5  -5   1   31.37    1.93 
  -5   5   1   33.43    2.16 
   5  -5   1   29.44    1.78 
   5  -5   1   31.15    2.03 
  -5  -5  -1   33.23    1.51 
   5   5  -1   31.40    1.27 
   5   5  -1   31.61    1.22 
  -5   5   1   34.52    1.87 
  -5  -5  -1   31.63    1.04 
  -5   5   1   29.73    1.84 
   5  -5   1   28.86    1.84 
   5   5  -1   33.18    1.94 
   5  -5   1   32.15    1.99 
   5  -5   1   34.43    1.92 
   5  -5  -1   35.80    1.14 
  -5   5  -1   33.33    1.93 
   5   5   1   35.91    1.51 
   5   5   1   37.60    1.56 
   5  -5  -1   35.24    1.88 
  -5  -5   1   36.84    1.35 
   5  -5  -1   35.86    1.88 
   5  -5  -1   34.05    1.98 
  -5   5  -1   37.11    2.12 
  -5   5  -1   37.72    1.87 
   5  -5  -1   34.30    1.95 
  -5   5  -1   36.32    1.98 
  -5   5  -1   35.96    1.96 
   5   5   1   35.14    2.05 
   5   5   1   34.35    1.68 
   5  -5  -1   33.74    2.10 
  -5  -5   1   35.58    1.86 
  -5  -5   1   38.60    1.43 
  -5  -5   1   38.03    1.41 
  -5  -5   1   34.21    1.31 
   5   5   1   35.86    1.51 
   5  -5  -1   37.20    1.82 
  -5   5  -1   36.01    2.18 
  -5  -5   1   36.30    1.38 
  -6   5   1   56.68    2.57 
  -6  -5  -1   54.62    2.18 
  -6   5   1   59.06    2.36 
   6  -5   1   54.33    2.63 
  -6   5   1   61.06    2.71 
  -6  -5  -1   61.16    2.20 
   6   5  -1   60.38    2.61 
   6  -5   1   54.58    2.76 
   6   5  -1   56.24    1.89 
   6   5  -1   61.02    2.01 
   6   5  -1   59.95    1.94 
   6  -5   1   60.52    2.57 
  -6   5   1   61.33    2.93 
  -6   5   1   58.00    2.47 
  -6  -5  -1   60.66    2.17 
  -6  -5  -1   61.16    1.84 
   6  -5   1   59.19    2.64 
  -6   5   1   61.74    2.67 
   6  -5   1   57.01    2.56 
  -6  -5  -1   56.08    2.10 
   6  -5   1   61.23    2.69 
   6  -5  -1   54.01    2.78 
  -6   5  -1   59.90    2.85 
  -6  -5   1   54.88    1.85 
  -6  -5   1   59.63    1.99 
   6  -5  -1   54.89    2.55 
  -6   5  -1   57.76    2.45 
   6  -5  -1   57.15    2.39 
  -6  -5   1   58.37    1.96 
  -6   5  -1   55.81    2.45 
  -6  -5   1   56.40    1.90 
   6  -5  -1   58.66    2.50 
   6   5   1   54.57    2.06 
  -6   5  -1   53.67    2.61 
   6  -5  -1   55.28    2.52 
   6   5   1   53.99    2.54 
   6   5   1   54.99    1.75 
  -6  -5   1   57.13    1.93 
   6   5   1   54.16    2.10 
  -6   5  -1   57.53    2.57 
  -6   5  -1   56.70    2.56 
   6   5   1   54.45    2.05 
  -6  -5   1   53.21    2.44 
   6  -5  -1   50.17    3.66 
   7   5  -1    5.92    0.89 
   7   5  -1    3.64    1.11 
   7  -5   1    5.05    1.32 
   7  -5   1    6.52    1.16 
  -7   5   1    6.54    1.05 
  -7  -5  -1    5.87    0.85 
  -7   5   1    6.45    1.45 
  -7   5   1    5.22    1.16 
   7  -5   1    4.40    1.23 
   7  -5   1    3.60    1.19 
  -7  -5  -1    7.38    0.95 
  -7  -5  -1    5.71    0.89 
  -7  -5  -1    5.94    0.88 
  -7   5   1    5.58    1.32 
   7  -5   1    5.59    1.20 
   7   5  -1    5.38    0.70 
  -7   5   1    8.48    1.43 
   7  -5   1    5.81    1.19 
   7   5  -1    4.97    0.80 
   7   5  -1    6.02    0.73 
  -7   5   1    5.40    1.24 
   7   5   1    3.22    0.73 
  -7   5  -1    1.96    1.24 
  -7  -5   1    3.86    0.75 
  -7   5  -1    2.12    1.13 
   7   5   1    3.80    0.85 
   7  -5  -1    3.22    1.21 
   7  -5  -1    3.75    1.09 
  -7  -5   1    3.28    0.72 
  -7   5  -1    3.85    1.18 
  -7  -5   1    2.49    0.71 
   7  -5  -1    2.32    0.97 
  -7   5  -1    0.46    1.55 
   7  -5  -1    4.02    1.02 
  -7  -5   1    3.13    0.65 
   7   5   1    3.59    1.19 
   7   5   1    2.26    0.76 
  -7  -5   1    2.99    0.72 
  -7   5  -1    3.15    1.29 
   7  -5  -1    2.59    1.08 
   7   5   1    2.66    0.58 
  -7   5  -1    3.42    1.03 
   7   5   1    3.95    0.89 
   7  -5  -1    2.33    1.17 
   8  -5   1   24.77    2.30 
  -8  -5  -1   24.47    1.74 
  -8  -5  -1   22.52    1.46 
   8   5  -1   24.35    1.53 
  -8  -5  -1   25.34    1.75 
   8  -5   1   24.75    2.19 
   8   5  -1   21.00    1.49 
   8  -5   1   24.54    2.55 
  -8   5   1   23.13    2.61 
  -8   5   1   15.67    2.07 
   8   5  -1   23.27    1.45 
   8  -5   1   20.92    2.21 
  -8   5   1   24.13    2.17 
  -8   5   1   24.23    2.29 
   8   5  -1   21.70    1.54 
   8  -5   1   21.02    2.29 
  -8  -5  -1   21.81    1.63 
   8   5  -1   23.41    1.39 
  -8   5   1   24.49    2.31 
   8   5  -1   22.67    2.19 
  -8  -5  -1   25.54    1.76 
   8  -5   1   22.59    2.24 
   8   5   1   26.25    1.71 
   8  -5  -1   29.55    2.35 
   8   5   1   26.32    1.69 
   8  -5  -1   27.27    2.64 
  -8   5  -1   28.37    2.49 
  -8  -5   1   28.44    1.64 
  -8  -5   1   27.93    1.61 
  -8   5  -1   27.33    2.25 
  -8   5  -1   26.26    2.60 
   8  -5  -1   26.66    2.28 
  -8   5  -1   29.24    2.50 
   8   5   1   30.20    1.87 
   8  -5  -1   27.93    2.16 
  -8   5  -1   28.15    2.29 
  -8  -5   1   30.75    1.72 
   8   5   1   29.77    2.39 
  -8   5  -1   24.74    2.73 
   8  -5  -1   29.08    2.38 
   8  -5  -1   30.00    2.38 
   8   5   1   28.57    1.51 
  -8  -5   1   28.14    1.72 
   8   5   1   30.76    1.94 
  -8  -5   1   28.60    1.50 
   9   5  -1   34.72    1.99 
  -9   5   1   37.32    3.07 
   9  -5   1   37.96    1.63 
  -9   5   1   37.63    2.71 
  -9   5   1   26.82    3.63 
  -9  -5  -1   35.11    1.99 
  -9  -5  -1   34.04    2.22 
  -9  -5  -1   36.72    2.15 
  -9   5   1   34.05    2.39 
  -9  -5  -1   35.46    1.90 
  -9   5   1   32.29    4.27 
   9  -5   1   34.82    2.73 
   9  -5   1   31.55    3.06 
  -9   5   1   33.52    2.64 
   9   5  -1   37.55    2.64 
   9   5  -1   33.61    1.91 
   9  -5   1   33.76    2.73 
  -9  -5  -1   36.08    2.25 
   9  -5   1   34.71    2.79 
   9   5  -1   34.91    1.79 
   9   5  -1   35.97    1.85 
   9  -5   1   38.61    2.75 
   9   5  -1   33.36    1.95 
  -9   5  -1   33.40    2.45 
  -9   5  -1   34.22    2.74 
   9   5   1   32.15    2.16 
  -9  -5   1   32.14    2.61 
   9   5   1   29.12    1.78 
  -9   5  -1   32.12    2.65 
   9  -5  -1   30.81    3.01 
   9  -5  -1   30.40    2.68 
  -9   5  -1   30.64    3.02 
   9  -5  -1   33.71    2.66 
   9   5   1   31.09    2.01 
   9  -5  -1   29.58    2.65 
   9   5   1   30.33    2.11 
   9   5   1   27.43    2.51 
  -9  -5   1   33.16    2.02 
  -9   5  -1   33.02    3.32 
   9  -5  -1   30.13    2.61 
  -9  -5   1   35.24    2.01 
  -9  -5   1   31.58    1.71 
  -9  -5   1   31.94    1.85 
   9   5   1   29.78    1.91 
  -9   5  -1   30.88    2.69 
  10   5  -1   14.18    1.89 
 -10   5   1   14.12    1.90 
  10  -5   1   14.37    1.95 
 -10  -5  -1   15.66    1.78 
  10   5  -1   12.89    1.57 
 -10   5   1   12.37    1.71 
  10  -5   1   10.09    1.87 
  10  -5   1   14.04    2.11 
 -10  -5  -1   15.99    1.95 
  10   5  -1   11.83    1.63 
 -10   5   1   15.74    2.01 
 -10  -5  -1   14.26    2.00 
 -10   5   1   14.68    1.97 
 -10  -5  -1   18.13    2.07 
  10  -5   1   15.09    2.30 
  10  -5   1   15.61    2.09 
  10   5  -1   15.66    1.86 
 -10  -5  -1   13.66    1.80 
  10   5  -1   12.18    1.72 
  10   5  -1   17.43    1.93 
  10  -5   1   16.62    1.27 
 -10   5   1   12.16    2.26 
 -10   5  -1    6.23    1.64 
 -10   5  -1    9.53    1.66 
 -10  -5   1   11.82    1.29 
  10   5   1   11.41    1.54 
 -10  -5   1   10.97    1.22 
  10   5   1   12.06    1.83 
  10  -5  -1    7.92    1.73 
  10  -5  -1    9.71    1.90 
 -10   5  -1    9.08    1.95 
  10   5   1   12.89    1.56 
  10  -5  -1    9.59    2.23 
  10  -5  -1   11.90    1.97 
  10   5   1   14.94    1.83 
 -10  -5   1   11.26    1.33 
 -10   5  -1   12.99    2.03 
 -10   5  -1   11.77    2.01 
  10  -5  -1   13.30    1.94 
  10   5   1   13.29    1.49 
  10   5   1   13.40    1.69 
 -10   5  -1   12.81    2.02 
 -10  -5   1   12.57    1.37 
 -10  -5   1   13.44    1.95 
  11  -5   1   14.19    2.25 
  11   5  -1   12.57    1.58 
  11   5  -1   12.69    1.66 
  11   5  -1   15.54    2.10 
 -11   5   1   14.80    2.27 
  11  -5   1   12.95    1.17 
 -11  -5  -1   16.12    2.22 
  11   5  -1   16.49    2.07 
 -11  -5  -1   15.31    1.68 
 -11  -5  -1   15.48    1.75 
 -11  -5  -1   11.02    1.61 
 -11   5   1   17.11    2.29 
 -11   5   1   11.95    1.88 
  11   5  -1   13.01    1.38 
 -11   5   1   11.32    1.94 
 -11  -5  -1   11.34    1.54 
 -11   5   1   11.49    2.26 
 -11   5   1   12.76    2.47 
  11  -5   1   10.93    2.46 
  11  -5   1   13.52    2.11 
  11   5   1    9.52    1.69 
  11   5   1    9.72    1.49 
 -11  -5   1   12.62    1.52 
  11   5   1   13.09    1.72 
 -11  -5   1   10.47    1.32 
 -11   5  -1   11.62    2.20 
 -11  -5   1   10.36    1.88 
 -11  -5   1    7.72    1.41 
 -11   5  -1   11.82    2.16 
  11  -5  -1    9.69    1.95 
 -11   5  -1    7.56    2.12 
  11   5   1    8.39    1.35 
 -11   5  -1   12.57    2.27 
  11  -5  -1    9.54    2.44 
  11  -5  -1   11.45    2.21 
 -11   5  -1    8.13    1.88 
 -11  -5   1    8.58    1.70 
 -11  -5   1   12.86    1.45 
  11   5   1   13.49    2.01 
 -11   5  -1   10.03    2.23 
  12  -5   1   26.50    2.89 
 -12  -5  -1   31.76    2.81 
 -12   5   1   30.26    3.43 
 -12   5   1   30.00    3.52 
  12  -5   1   30.88    3.74 
 -12   5   1   34.11    4.31 
 -12  -5  -1   33.84    3.04 
  12   5  -1   27.82    3.28 
 -12   5   1   24.29    2.74 
 -12  -5  -1   32.34    2.80 
  12   5  -1   29.71    2.91 
 -12   5   1   26.93    2.92 
  12   5   1   36.72    4.79 
  12  -5  -1   32.38    3.93 
 -12   5  -1   28.12    3.75 
 -12   5  -1   33.34    3.93 
 -12  -5   1   31.30    3.66 
 -12  -5   1   33.15    2.83 
  12   5   1   30.89    3.48 
 -12   5  -1   34.62    4.27 
 -12  -5   1   28.24    2.59 
 -12   5  -1   29.09    3.62 
 -12  -5   1   29.69    2.47 
 -12  -5   1   32.32    2.80 
  12  -5  -1   30.84    3.54 
 -12   5  -1   28.65    3.86 
  13  -5   1   17.79    3.13 
 -13   5   1   15.01    2.69 
 -13   5   1   12.17    3.11 
 -13  -5  -1   21.50    2.98 
 -13  -5  -1   10.77    1.99 
  13   5  -1   22.05    2.69 
 -13   5   1   14.43    2.81 
 -13   5  -1   15.27    2.90 
 -13  -5   1   13.45    1.86 
  13  -5  -1   15.45    3.00 
 -13   5  -1    6.39    2.55 
 -13   5  -1    9.56    3.03 
 -13  -5   1   14.21    1.83 
  13   5   1   16.77    2.61 
   0   6  -1   -0.33    0.52 
   0  -6  -1    0.93    0.58 
   0  -6  -1    0.07    0.58 
   0  -6  -1    0.14    0.58 
   0  -6   1    1.16    0.61 
   0   6  -1    0.47    0.46 
   0  -6   1    0.83    0.55 
   0   6   1    0.71    0.61 
   0  -6   1    0.32    0.47 
   0   6  -1    0.26    0.47 
   0   6  -1    0.58    0.64 
   0  -6   1    0.73    0.53 
   0   6   1    0.51    0.58 
   0  -6  -1   -0.05    0.45 
   0   6  -1    0.80    0.49 
   0  -6   1    0.64    0.57 
   0   6  -1    0.16    0.53 
   0  -6  -1    0.72    0.55 
   0   6   1    0.36    0.47 
   0  -6  -1    0.38    0.52 
   0  -6  -1    0.51    0.60 
   0  -6   1    0.00    0.44 
   0   6   1    0.91    0.53 
   0   6   1    0.35    0.57 
   0  -6   1    0.62    0.63 
  -1  -6  -1   80.59    2.50 
  -1   6   1   80.46    2.66 
   1  -6   1   80.99    2.65 
   1   6  -1   66.75    2.84 
  -1  -6  -1   78.94    2.51 
   1  -6   1   81.52    2.59 
   1   6  -1   78.98    2.38 
  -1  -6  -1   79.28    2.53 
  -1   6   1   78.27    2.60 
  -1  -6  -1   78.30    2.30 
   1  -6   1   80.83    2.60 
  -1   6   1   82.72    2.67 
  -1   6   1   78.85    2.63 
  -1  -6  -1   80.92    2.68 
   1  -6   1   79.43    2.59 
  -1   6   1   79.29    2.58 
  -1   6   1   77.43    2.58 
   1   6  -1   78.85    2.69 
   1  -6   1   80.58    2.54 
  -1   6   1   80.29    2.51 
  -1  -6  -1   78.11    2.66 
   1  -6   1   82.40    2.73 
   1  -6   1   82.39    2.56 
  -1  -6  -1   79.72    2.53 
   1  -6  -1   73.79    2.35 
  -1  -6   1   71.31    2.49 
   1   6   1   70.09    2.30 
   1   6   1   74.53    2.17 
  -1   6  -1   69.92    2.37 
  -1  -6   1   74.49    2.25 
  -1  -6   1   70.95    2.55 
   1   6   1   73.04    2.53 
  -1  -6   1   69.52    2.22 
   1  -6  -1   70.91    2.44 
  -1  -6   1   69.53    2.22 
   1  -6  -1   71.14    2.44 
  -1   6  -1   68.11    3.17 
   1  -6  -1   72.64    2.46 
  -1   6  -1   70.88    2.37 
  -1  -6   1   72.81    2.24 
  -1   6  -1   75.55    2.52 
   1  -6  -1   74.50    2.50 
   1  -6  -1   73.55    2.49 
   1   6   1   72.13    2.32 
  -1   6  -1   74.93    2.46 
  -1   6  -1   69.73    2.46 
  -1  -6   1   70.55    2.21 
   1   6   1   74.27    2.36 
   1   6   1   70.69    2.32 
   1  -6  -1   71.31    2.46 
   2  -6   1   27.86    1.61 
   2  -6   1   22.45    1.26 
  -2  -6  -1   22.99    1.55 
  -2  -6  -1   25.65    1.28 
  -2   6   1   23.86    1.36 
  -2   6   1   20.82    1.35 
   2  -6   1   25.02    1.43 
  -2  -6  -1   23.53    1.24 
   2   6  -1   23.33    1.08 
   2  -6   1   23.05    1.46 
  -2   6   1   26.31    1.64 
  -2  -6  -1   22.19    1.24 
  -2   6   1   24.15    1.23 
  -2  -6  -1   25.57    1.29 
   2  -6   1   24.63    1.41 
  -2   6   1   24.77    1.56 
   2  -6   1   21.92    1.55 
  -2   6   1   24.29    1.46 
   2   6  -1   26.39    1.62 
   2   6  -1   23.68    1.07 
   2  -6   1   25.13    1.49 
  -2  -6  -1   24.26    0.91 
   2   6  -1   23.11    1.10 
   2   6  -1   23.76    1.08 
  -2   6   1   21.86    1.32 
  -2  -6   1   21.56    1.52 
  -2   6  -1   22.76    1.41 
  -2   6  -1   22.51    1.38 
  -2   6  -1   21.35    1.59 
   2  -6  -1   19.29    1.40 
  -2  -6   1   23.08    1.09 
   2  -6  -1   20.97    1.17 
   2  -6  -1   23.07    1.43 
   2  -6  -1   20.59    1.34 
   2  -6  -1   21.86    1.51 
   2   6   1   21.41    1.17 
   2   6   1   22.73    1.27 
  -2  -6   1   20.81    1.07 
   2   6   1   22.16    1.16 
  -2  -6   1   22.66    1.11 
  -2  -6   1   19.97    1.46 
  -2   6  -1   20.87    1.40 
   2   6   1   20.98    1.53 
   2  -6  -1   24.17    1.44 
  -2   6  -1   20.73    1.46 
   2  -6  -1   22.75    1.39 
  -2  -6   1   20.33    1.07 
  -2   6  -1   21.36    1.38 
  -3   6   1   48.59    2.09 
   3  -6   1   45.55    2.01 
   3  -6   1   49.41    2.06 
  -3  -6  -1   46.80    1.77 
  -3  -6  -1   48.22    1.78 
  -3   6   1   48.66    2.10 
   3  -6   1   47.64    1.77 
  -3  -6  -1   45.73    1.76 
  -3  -6  -1   47.14    2.14 
   3   6  -1   48.96    2.21 
  -3   6   1   45.81    1.94 
   3  -6   1   46.90    2.09 
   3  -6   1   49.51    2.14 
   3   6  -1   43.97    1.54 
  -3   6   1   50.18    2.19 
  -3  -6  -1   46.83    1.73 
   3  -6   1   48.15    2.24 
  -3   6   1   46.78    2.00 
   3   6  -1   48.09    1.59 
  -3   6   1   47.42    2.23 
   3  -6   1   46.19    2.06 
   3   6  -1   48.59    1.56 
   3   6   1   59.77    2.01 
   3  -6  -1   58.82    2.27 
  -3   6  -1   60.66    2.37 
  -3   6  -1   60.55    2.54 
   3  -6  -1   57.18    2.38 
   3  -6  -1   59.47    1.90 
  -3  -6   1   57.35    1.83 
  -3   6  -1   57.40    2.29 
  -3   6  -1   57.52    2.31 
   3   6   1   61.57    2.47 
   3   6   1   55.58    1.98 
   3   6   1   55.76    2.00 
  -3  -6   1   57.23    2.35 
  -3  -6   1   56.70    1.81 
  -3   6  -1   57.02    2.24 
   3  -6  -1   62.07    2.43 
  -3   6  -1   60.97    2.36 
   3  -6  -1   58.40    2.47 
  -3  -6   1   60.05    1.88 
   3  -6  -1   58.45    2.30 
   3  -6  -1   60.42    2.38 
   4  -6   1   25.55    1.79 
   4  -6   1   25.70    1.77 
  -4   6   1   25.72    1.80 
  -4  -6  -1   26.01    1.35 
   4   6  -1   25.04    1.11 
   4   6  -1   26.95    1.81 
   4   6  -1   27.42    1.08 
   4  -6   1   25.06    1.71 
  -4  -6  -1   25.62    1.26 
  -4   6   1   26.52    1.84 
  -4   6   1   25.79    1.81 
   4  -6   1   25.27    1.25 
  -4  -6  -1   26.11    1.75 
   4   6  -1   25.60    1.07 
  -4  -6  -1   24.33    1.28 
  -4   6   1   23.40    1.66 
  -4   6   1   26.44    1.69 
  -4  -6  -1   27.10    1.34 
   4  -6   1   22.62    1.56 
   4  -6   1   25.70    1.90 
  -4   6   1   25.28    1.48 
   4  -6   1   24.14    1.70 
  -4  -6   1   32.74    1.20 
   4   6   1   31.73    1.94 
  -4   6  -1   32.49    1.91 
   4  -6  -1   28.42    1.71 
   4  -6  -1   31.04    1.81 
   4  -6  -1   33.45    1.91 
   4   6   1   28.84    1.44 
  -4  -6   1   31.31    1.23 
   4  -6  -1   30.84    1.76 
   4  -6  -1   30.46    2.00 
  -4   6  -1   29.23    1.69 
   4   6   1   30.38    1.37 
   4  -6  -1   29.90    1.20 
  -4  -6   1   31.77    1.26 
  -4  -6   1   28.73    1.80 
  -4   6  -1   29.94    2.01 
   4   6   1   30.07    1.38 
  -4  -6   1   28.30    1.17 
  -4   6  -1   29.91    1.81 
   4   6   1   31.17    1.41 
  -4   6  -1   30.69    1.71 
  -4   6  -1   29.64    1.94 
   4  -6  -1   30.41    1.71 
   5   6  -1    1.61    0.50 
  -5   6   1    1.91    0.73 
   5  -6   1    1.70    1.21 
  -5   6   1    2.31    0.84 
  -5   6   1    1.96    0.98 
   5  -6   1    1.45    0.86 
  -5  -6  -1    2.03    0.65 
   5  -6   1    2.00    0.88 
  -5   6   1    1.18    0.82 
   5   6  -1    2.51    0.98 
   5   6  -1    2.03    0.46 
  -5  -6  -1    1.92    0.66 
   5  -6   1    1.27    0.97 
   5   6  -1    1.33    0.44 
  -5  -6  -1    2.07    0.57 
  -5  -6  -1    1.80    0.61 
  -5   6   1    1.05    1.02 
   5  -6   1    2.04    0.99 
   5  -6   1    4.91    1.02 
  -5   6   1    2.54    1.04 
  -5  -6  -1    2.61    0.93 
   5  -6  -1    3.19    1.02 
   5   6   1    2.69    0.64 
   5  -6  -1    2.75    1.25 
   5   6   1    3.24    0.61 
  -5  -6   1    3.07    0.53 
  -5  -6   1    2.53    0.55 
  -5   6  -1    1.11    0.99 
   5  -6  -1    2.24    0.43 
  -5   6  -1    2.23    0.96 
  -5   6  -1    2.54    1.05 
  -5   6  -1    3.43    0.97 
  -5  -6   1    2.13    0.50 
   5   6   1    2.68    0.60 
   5  -6  -1    2.66    0.87 
  -5  -6   1    3.10    0.54 
  -5  -6   1    3.31    0.96 
  -5   6  -1    2.49    0.83 
   5  -6  -1    3.97    1.11 
  -5   6  -1    1.20    0.93 
   5  -6  -1    3.20    0.98 
   5   6   1    4.95    1.14 
  -5  -6   1    3.18    0.53 
   5  -6  -1    1.64    0.83 
   5   6   1    1.86    0.65 
   6  -6   1   21.65    1.95 
   6   6  -1   23.18    1.12 
  -6  -6  -1   21.75    1.70 
  -6   6   1   21.44    1.67 
  -6   6   1   26.40    2.08 
  -6  -6  -1   23.79    1.42 
   6   6  -1   20.15    1.70 
   6  -6   1   22.59    1.93 
   6  -6   1   25.02    1.99 
   6   6  -1   22.07    1.21 
   6  -6   1   24.39    2.16 
   6   6  -1   22.25    1.92 
  -6  -6  -1   22.97    1.44 
  -6   6   1   21.91    2.22 
  -6   6   1   22.82    1.85 
  -6  -6  -1   20.18    1.31 
  -6   6   1   23.01    2.00 
   6  -6   1   21.88    1.99 
  -6   6   1   20.67    1.78 
   6  -6   1   23.12    1.85 
  -6  -6   1   22.02    1.14 
  -6   6  -1   24.79    2.01 
   6  -6  -1   25.21    1.92 
   6   6   1   23.45    2.01 
  -6  -6   1   23.35    1.19 
   6  -6  -1   20.77    2.26 
  -6   6  -1   22.95    1.91 
   6  -6  -1   22.75    0.89 
   6   6   1   22.69    1.34 
  -6  -6   1   23.09    1.19 
   6   6   1   24.02    1.39 
  -6  -6   1   24.44    1.23 
   6  -6  -1   27.12    1.83 
  -6   6  -1   21.53    1.73 
  -6  -6   1   22.84    2.06 
   6   6   1   19.59    2.12 
  -6   6  -1   20.47    1.90 
  -6   6  -1   27.42    2.26 
   6  -6  -1   21.46    2.00 
   6  -6  -1   23.34    1.93 
   6   6   1   22.83    1.37 
  -6   6  -1   22.38    2.06 
   6  -6  -1   22.87    2.13 
  -6  -6   1   23.99    1.25 
  -7  -6  -1   70.49    2.56 
   7   6  -1   72.77    2.39 
  -7   6   1   72.16    3.29 
   7  -6   1   69.62    3.15 
  -7   6   1   70.22    3.08 
   7   6  -1   66.84    2.23 
  -7   6   1   71.69    3.23 
  -7   6   1   66.04    2.84 
   7  -6   1   70.79    3.45 
   7   6  -1   68.07    2.26 
  -7  -6  -1   67.13    2.46 
  -7  -6  -1   70.40    2.57 
   7   6  -1   68.29    3.06 
   7  -6   1   69.37    3.01 
   7  -6   1   70.91    3.23 
  -7   6   1   73.49    3.49 
   7  -6   1   69.11    3.10 
  -7  -6  -1   71.02    2.58 
  -7   6   1   70.67    2.97 
   7  -6   1   68.89    3.15 
   7  -6  -1   63.41    2.72 
  -7   6  -1   65.35    3.09 
   7  -6  -1   64.17    2.90 
  -7   6  -1   61.05    2.93 
  -7   6  -1   58.71    2.77 
  -7  -6   1   60.83    2.14 
  -7  -6   1   58.30    2.78 
  -7  -6   1   65.53    2.23 
   7  -6  -1   62.74    2.99 
   7  -6  -1   62.33    2.96 
  -7   6  -1   61.29    3.30 
  -7  -6   1   59.31    2.09 
   7   6   1   59.40    2.40 
  -7  -6   1   63.99    2.17 
   7   6   1   60.86    2.29 
   7   6   1   68.63    3.08 
  -7  -6   1   62.06    2.20 
   7  -6  -1   62.21    2.94 
   7  -6  -1   60.87    3.27 
  -7   6  -1   61.56    2.98 
   7   6   1   58.33    2.30 
   8  -6   1   10.91    1.63 
   8   6  -1   12.65    1.31 
   8  -6   1   12.94    1.73 
  -8   6   1   10.03    1.39 
   8  -6   1    7.56    1.49 
  -8   6   1    9.24    1.50 
  -8  -6  -1   11.86    1.55 
   8   6  -1   11.96    1.21 
  -8   6   1   12.70    2.02 
  -8  -6  -1   11.16    1.53 
   8   6  -1   10.58    1.58 
  -8   6   1    8.77    1.54 
  -8   6   1   14.64    2.06 
   8   6  -1   11.64    1.15 
  -8  -6  -1   14.67    1.56 
  -8   6   1   13.72    1.79 
   8  -6   1   11.41    1.74 
   8  -6   1   11.27    1.76 
  -8  -6  -1    9.62    1.10 
   8  -6   1   12.28    1.63 
   8   6   1   11.53    1.63 
  -8  -6   1   12.16    1.29 
  -8   6  -1   13.78    1.86 
   8  -6  -1   14.82    1.85 
  -8  -6   1   14.82    1.34 
   8  -6  -1   14.89    1.79 
  -8   6  -1   10.95    1.56 
   8   6   1   12.52    1.46 
  -8   6  -1   13.34    1.97 
   8   6   1   15.70    1.61 
  -8  -6   1   13.58    1.40 
   8  -6  -1   13.11    1.73 
  -8   6  -1   13.49    1.73 
   8  -6  -1   15.21    1.84 
   8  -6  -1   14.20    1.95 
   8  -6  -1   13.25    1.54 
  -8  -6   1   11.39    1.21 
  -8  -6   1   11.62    1.35 
  -8   6  -1   12.49    1.59 
   8   6   1   14.43    1.59 
  -8   6  -1   11.61    1.72 
   8   6   1   12.19    1.42 
   9  -6   1   10.05    1.84 
  -9   6   1    8.11    1.45 
   9  -6   1    7.98    1.69 
   9   6  -1    8.40    1.00 
  -9  -6  -1    9.00    1.23 
   9  -6   1    6.48    1.68 
  -9   6   1    7.15    1.53 
  -9   6   1    6.36    1.78 
  -9   6   1   10.18    1.83 
  -9   6   1   10.24    1.74 
   9  -6   1    7.32    1.57 
  -9  -6  -1    7.59    1.15 
  -9  -6  -1    9.30    1.27 
  -9   6   1    7.78    1.71 
   9  -6   1    7.78    1.95 
   9   6  -1    8.97    1.62 
  -9  -6  -1   10.22    1.27 
   9   6  -1    6.81    0.90 
   9  -6   1    9.50    1.64 
   9   6  -1    9.50    1.16 
   9   6   1    7.66    1.10 
  -9   6  -1    8.87    1.74 
  -9  -6   1    9.06    1.10 
   9   6   1   10.85    1.34 
   9   6   1    9.60    1.28 
   9   6   1    9.05    1.68 
  -9  -6   1    9.17    1.07 
  -9   6  -1    6.89    1.49 
   9  -6  -1   11.15    1.84 
   9  -6  -1    5.62    1.79 
  -9  -6   1    8.04    0.98 
   9  -6  -1    8.02    1.71 
   9  -6  -1   10.47    1.88 
  -9  -6   1    9.38    1.34 
  -9   6  -1    8.03    1.82 
  -9   6  -1    5.65    1.85 
  -9  -6   1    8.84    1.16 
  -9   6  -1    7.17    1.78 
   9  -6  -1    9.65    1.77 
   9   6   1    8.59    1.17 
 -10   6   1   48.20    2.98 
  10  -6   1   47.51    3.54 
  10   6  -1   48.16    2.44 
  10  -6   1   46.72    3.44 
 -10   6   1   45.35    3.82 
 -10  -6  -1   50.21    2.98 
  10   6  -1   46.06    2.14 
 -10  -6  -1   48.18    2.63 
  10  -6   1   47.92    3.91 
  10  -6   1   51.64    1.74 
 -10   6   1   47.97    3.33 
 -10   6   1   47.90    3.41 
  10   6  -1   50.20    3.29 
 -10  -6  -1   56.19    2.69 
  10  -6   1   53.93    3.50 
 -10   6   1   45.30    3.42 
  10  -6   1   50.52    3.53 
  10   6  -1   45.22    2.18 
 -10   6   1   45.56    3.28 
 -10  -6  -1   44.31    2.40 
  10   6   1   47.77    2.48 
  10  -6  -1   43.42    3.88 
 -10   6  -1   52.94    3.55 
 -10  -6   1   48.61    2.46 
  10   6   1   43.52    3.22 
 -10   6  -1   46.31    3.69 
 -10  -6   1   51.29    2.39 
  10  -6  -1   42.72    3.41 
 -10  -6   1   47.94    2.20 
 -10  -6   1   49.15    2.28 
 -10   6  -1   49.99    3.20 
 -10   6  -1   47.55    3.37 
  10   6   1   46.26    2.54 
 -10  -6   1   47.38    2.39 
  10   6   1   52.17    2.71 
  10  -6  -1   49.48    3.51 
 -10   6  -1   45.13    3.39 
 -10   6  -1   52.93    3.48 
  10  -6  -1   52.72    3.33 
  10   6   1   50.94    2.72 
  10  -6  -1   44.84    3.29 
 -11  -6  -1    0.60    1.84 
 -11   6   1    2.74    1.63 
 -11   6   1    7.87    2.14 
 -11  -6  -1    4.94    1.51 
  11  -6   1    2.08    1.88 
 -11   6   1    0.91    2.07 
 -11   6   1    3.34    1.92 
 -11   6   1    6.05    1.99 
 -11  -6  -1    4.19    1.23 
 -11  -6  -1    3.50    1.34 
  11  -6   1    2.59    2.09 
 -11  -6  -1    2.85    1.34 
 -11   6   1   -2.10    1.84 
  11   6  -1    3.19    1.09 
  11   6  -1    5.13    1.35 
  11   6   1    4.14    1.32 
  11  -6  -1   -0.54    1.79 
  11   6   1    6.12    1.53 
  11   6   1    4.12    1.83 
 -11   6  -1    5.62    2.13 
 -11   6  -1    3.75    2.21 
 -11   6  -1    2.64    2.14 
 -11   6  -1    3.88    1.80 
 -11   6  -1    6.04    2.09 
 -11   6  -1    2.38    2.01 
  11   6   1    5.08    1.57 
 -11  -6   1    3.43    1.20 
  11  -6  -1    6.57    2.18 
 -11  -6   1    2.26    1.25 
 -11  -6   1    3.27    1.13 
 -11  -6   1    2.55    1.25 
 -12  -6  -1   15.19    2.60 
 -12  -6  -1   11.61    1.77 
 -12   6   1   11.28    2.28 
 -12   6   1   10.31    2.52 
  12   6  -1   11.47    2.24 
  12   6  -1   10.49    1.86 
 -12   6   1   13.19    2.92 
  12  -6   1   10.16    2.71 
 -12   6   1    6.56    2.54 
  12  -6   1   10.26    2.81 
 -12  -6  -1   11.54    1.82 
 -12   6   1   12.86    2.60 
 -12   6  -1   14.20    2.81 
 -12   6  -1   15.57    2.74 
  12   6   1   11.24    2.38 
 -12  -6   1   11.92    1.55 
 -12  -6   1   16.96    2.44 
 -12   6  -1   13.79    2.51 
 -12   6  -1   18.86    2.88 
 -12   6  -1   15.31    2.82 
  12  -6  -1   13.57    2.67 
 -12  -6   1   12.27    1.62 
 -12  -6   1   11.39    1.77 
 -13   6   1   13.92    2.93 
 -13   6   1   10.59    3.15 
 -13   6   1    5.04    2.65 
  13   6  -1   13.31    2.66 
 -13  -6  -1    7.65    1.89 
 -13  -6  -1    3.69    1.81 
  13  -6   1   10.96    3.14 
  13  -6  -1   11.99    3.05 
 -13  -6   1   13.02    1.77 
  13   6   1   10.77    2.69 
 -13   6  -1   16.13    3.22 
 -13   6  -1    6.52    2.65 
 -13   6  -1    9.26    3.22 
 -13  -6   1    9.50    1.76 
   0  -7   1   20.82    1.29 
   0  -7  -1   20.31    1.51 
   0  -7   1   23.79    1.34 
   0  -7  -1   23.43    1.34 
   0  -7  -1   20.07    1.37 
   0  -7  -1   22.66    1.45 
   0   7   1   23.37    1.45 
   0   7  -1   23.38    1.54 
   0   7   1   24.54    1.39 
   0  -7   1   19.20    1.48 
   0   7  -1   22.90    1.30 
   0  -7   1   21.48    1.33 
   0  -7  -1   21.42    1.40 
   0  -7  -1   22.41    1.33 
   0  -7   1   21.57    1.61 
   0   7  -1   21.53    1.32 
   0   7   1   22.21    1.51 
   0   7  -1   22.72    1.26 
   0   7  -1   21.14    1.35 
   0   7  -1   24.00    1.56 
   0  -7   1   23.02    1.42 
   0  -7  -1   21.78    1.45 
   0  -7   1   24.92    1.41 
   0   7   1   22.09    1.35 
  -1   7   1   35.64    1.76 
  -1  -7  -1   38.55    1.68 
   1  -7   1   34.73    1.82 
  -1   7   1   35.48    1.66 
  -1   7   1   39.38    1.75 
  -1  -7  -1   37.25    1.67 
  -1  -7  -1   37.48    1.69 
  -1  -7  -1   37.00    1.49 
  -1  -7  -1   39.30    1.75 
   1  -7   1   39.30    1.78 
   1   7  -1   38.54    1.60 
   1  -7   1   37.99    1.76 
  -1  -7  -1   37.93    1.94 
  -1  -7  -1   37.43    1.87 
   1  -7   1   41.15    1.94 
  -1   7   1   38.14    1.88 
  -1   7   1   39.50    1.88 
  -1   7   1   38.13    1.84 
   1  -7   1   39.92    1.82 
   1   7  -1   36.94    1.56 
   1  -7   1   34.45    1.75 
   1  -7   1   41.14    1.76 
   1   7  -1   37.65    1.55 
  -1   7   1   37.33    1.78 
   1   7  -1   37.26    1.95 
   1   7   1   45.73    1.83 
  -1  -7   1   48.35    1.80 
   1   7   1   48.09    1.74 
  -1  -7   1   45.96    2.16 
   1  -7  -1   46.02    1.92 
   1  -7  -1   44.62    2.00 
   1  -7  -1   45.58    2.03 
  -1  -7   1   48.25    1.84 
  -1   7  -1   48.24    2.08 
  -1   7  -1   48.13    2.04 
  -1  -7   1   43.90    1.76 
   1  -7  -1   43.83    1.97 
   1   7   1   47.36    2.08 
  -1  -7   1   45.42    2.07 
   1  -7  -1   45.29    1.93 
  -1   7  -1   49.45    2.05 
   1   7   1   47.00    1.90 
   1  -7  -1   48.81    2.12 
  -1   7  -1   49.08    1.95 
  -1   7  -1   45.83    1.92 
  -1  -7   1   49.29    1.78 
   1   7   1   45.70    1.86 
  -1  -7   1   46.13    1.79 
   1  -7  -1   45.63    2.04 
   1   7   1   44.74    1.84 
  -1   7  -1   46.30    2.05 
  -1   7  -1   51.54    2.03 
  -2  -7  -1  109.06    3.59 
   2  -7   1  116.00    3.64 
  -2   7   1  111.57    3.52 
  -2  -7  -1  106.19    3.27 
  -2   7   1  107.53    3.45 
  -2   7   1  109.79    3.60 
  -2  -7  -1  110.01    2.96 
   2   7  -1  108.21    3.13 
   2  -7   1  109.11    3.32 
   2  -7   1  110.72    3.49 
  -2  -7  -1  109.18    3.28 
   2  -7   1  112.12    3.53 
  -2   7   1  103.86    3.41 
   2   7  -1  106.70    3.60 
   2  -7   1  114.27    3.65 
  -2  -7  -1  109.30    3.31 
   2   7  -1  108.18    3.16 
   2  -7   1  112.65    3.55 
  -2  -7  -1  109.09    3.31 
   2  -7   1  114.50    3.54 
  -2  -7  -1  112.92    3.65 
  -2   7   1  107.24    3.57 
  -2   7   1  110.16    3.53 
   2   7  -1  105.74    3.15 
   2   7  -1  109.86    3.15 
  -2   7   1  108.32    3.25 
   2   7   1  103.33    3.49 
  -2  -7   1  104.07    3.09 
   2  -7  -1  109.56    3.48 
   2  -7  -1  108.26    3.47 
  -2  -7   1  102.84    3.50 
  -2  -7   1  106.10    3.07 
  -2  -7   1  104.25    3.00 
  -2  -7   1  107.38    3.50 
   2   7   1  109.41    3.20 
  -2   7  -1  109.65    3.46 
   2  -7  -1  106.93    3.49 
  -2  -7   1  102.69    3.07 
   2   7   1  104.17    3.21 
  -2  -7   1  100.86    3.06 
   2  -7  -1  105.80    3.45 
   2  -7  -1  104.79    3.44 
  -2   7  -1  107.40    3.48 
  -2   7  -1  103.67    3.32 
  -2   7  -1  107.00    3.40 
   2  -7  -1  107.07    3.17 
   2  -7  -1  105.40    3.48 
   2   7   1  105.91    3.21 
  -2   7  -1  108.10    3.43 
  -2   7  -1  101.43    3.51 
  -3   7   1   44.12    2.10 
   3  -7   1   45.78    2.18 
   3  -7   1   43.02    1.78 
   3  -7   1   45.25    2.19 
  -3   7   1   44.86    1.97 
  -3  -7  -1   44.64    1.76 
  -3  -7  -1   43.84    1.79 
  -3  -7  -1   46.04    1.81 
   3   7  -1   44.07    1.57 
   3   7  -1   43.98    2.20 
   3   7  -1   46.58    1.61 
   3  -7   1   43.71    2.12 
   3  -7   1   45.25    2.07 
  -3   7   1   44.53    2.28 
  -3  -7  -1   40.80    2.11 
   3   7  -1   44.20    1.63 
   3  -7   1   43.55    2.20 
  -3   7   1   44.72    2.10 
  -3  -7  -1   42.24    1.78 
   3   7  -1   43.54    1.61 
   3  -7   1   44.34    2.05 
  -3   7   1   45.68    2.12 
  -3   7   1   46.08    2.18 
  -3   7  -1   42.18    2.02 
   3   7   1   40.24    1.67 
  -3   7  -1   39.93    2.10 
   3  -7  -1   41.18    2.16 
  -3   7  -1   39.85    2.21 
  -3  -7   1   41.23    1.57 
  -3  -7   1   41.47    2.11 
   3  -7  -1   43.12    2.13 
  -3   7  -1   38.93    1.96 
  -3  -7   1   38.54    1.52 
   3  -7  -1   39.84    2.04 
   3   7   1   40.14    1.67 
   3  -7  -1   40.54    1.99 
   3   7   1   42.00    1.73 
   3   7   1   39.92    2.09 
  -3   7  -1   42.27    1.91 
   3  -7  -1   39.02    2.03 
  -3  -7   1   40.21    1.52 
   3   7   1   37.35    1.63 
   3  -7  -1   41.84    2.00 
  -3  -7   1   41.31    1.62 
  -3   7  -1   38.37    1.98 
   3  -7  -1   40.74    1.61 
  -3  -7   1   37.74    2.03 
  -4  -7  -1   65.10    2.24 
  -4  -7  -1   65.39    2.26 
  -4   7   1   66.24    2.88 
   4   7  -1   65.06    2.00 
   4  -7   1   62.30    2.60 
   4  -7   1   62.35    2.18 
  -4   7   1   63.54    2.64 
   4  -7   1   66.70    2.75 
  -4   7   1   62.05    2.62 
   4   7  -1   62.50    1.98 
   4  -7   1   67.73    2.68 
   4  -7   1   62.03    2.63 
  -4  -7  -1   62.73    2.64 
  -4   7   1   67.17    2.78 
  -4   7   1   67.65    2.80 
  -4  -7  -1   60.71    2.19 
  -4   7   1   65.60    2.48 
   4   7  -1   66.62    2.78 
   4  -7   1   64.81    2.62 
   4   7  -1   63.05    2.04 
   4  -7   1   63.88    2.79 
  -4  -7  -1   60.49    2.22 
  -4  -7   1   50.34    2.40 
  -4  -7   1   53.79    1.81 
  -4  -7   1   53.74    1.85 
   4   7   1   52.77    1.96 
  -4   7  -1   53.92    2.33 
   4  -7  -1   55.58    2.38 
  -4   7  -1   53.30    2.34 
  -4   7  -1   55.53    2.50 
   4  -7  -1   56.77    2.44 
   4  -7  -1   52.83    2.46 
  -4   7  -1   53.69    2.43 
   4  -7  -1   51.43    2.54 
   4   7   1   52.85    1.98 
  -4  -7   1   50.74    1.76 
   4  -7  -1   56.02    2.42 
  -4  -7   1   58.51    1.72 
  -4   7  -1   55.99    2.46 
   4  -7  -1   53.47    2.33 
   4   7   1   53.93    1.98 
  -4   7  -1   58.99    2.71 
   4   7   1   55.19    2.54 
   4  -7  -1   53.38    1.84 
  -4  -7   1   56.48    1.86 
   5   7  -1   19.69    1.11 
   5   7  -1   19.74    1.02 
  -5  -7  -1   19.99    1.33 
   5  -7   1   20.75    1.83 
   5  -7   1   18.70    1.98 
  -5   7   1   17.89    1.77 
   5  -7   1   20.70    1.21 
  -5   7   1   20.07    2.04 
   5  -7   1   21.63    1.78 
   5  -7   1   22.91    1.80 
   5   7  -1   24.26    1.96 
   5  -7   1   15.86    2.21 
  -5  -7  -1   16.80    2.15 
   5  -7   1   18.79    1.83 
   5   7  -1   20.12    1.03 
  -5   7   1   19.34    1.56 
  -5   7   1   21.76    1.98 
  -5   7   1   21.51    1.68 
  -5   7   1   19.95    1.91 
  -5  -7  -1   18.50    1.23 
  -5  -7  -1   20.91    1.36 
  -5   7  -1   18.89    1.97 
   5  -7  -1   19.41    1.72 
  -5   7  -1   21.20    1.81 
   5   7   1   20.70    1.28 
  -5   7  -1   19.85    1.71 
   5  -7  -1   19.00    1.04 
   5  -7  -1   20.99    1.98 
  -5   7  -1   20.35    1.79 
  -5  -7   1   23.00    1.19 
   5   7   1   21.10    1.95 
   5  -7  -1   22.47    1.79 
  -5   7  -1   22.22    2.14 
  -5  -7   1   19.60    2.62 
   5  -7  -1   22.90    1.84 
  -5  -7   1   20.08    1.07 
   5  -7  -1   22.08    1.96 
  -5  -7   1   23.06    1.02 
  -5  -7   1   22.16    1.15 
   5   7   1   21.92    1.36 
   5   7   1   21.77    1.29 
   5  -7  -1   22.41    1.77 
   5   7   1   18.46    1.56 
  -5   7  -1   23.57    1.99 
   6   7  -1   23.01    2.16 
   6  -7   1   24.47    2.09 
  -6   7   1   20.53    1.91 
   6  -7   1   23.72    2.28 
   6  -7   1   24.08    2.19 
  -6   7   1   23.80    2.14 
   6  -7   1   21.61    2.06 
  -6   7   1   21.69    1.77 
  -6   7   1   24.75    1.79 
   6  -7   1   22.63    1.89 
   6   7  -1   22.85    1.16 
   6   7  -1   24.73    1.27 
  -6  -7  -1   21.87    1.48 
  -6  -7  -1   25.25    1.50 
  -6   7   1   22.80    2.28 
  -6  -7  -1   22.09    1.48 
  -6  -7  -1   21.02    1.36 
   6  -7   1   20.23    1.24 
  -6   7   1   25.55    2.11 
   6   7  -1   23.00    1.15 
   6   7   1   16.40    1.26 
  -6   7  -1   18.20    2.09 
  -6   7  -1   18.62    1.89 
  -6  -7   1   15.73    1.87 
  -6  -7   1   18.62    1.19 
   6  -7  -1   14.95    1.98 
   6  -7  -1   17.59    1.95 
  -6  -7   1   17.78    1.18 
   6   7   1   19.10    2.06 
   6   7   1   17.32    1.27 
   6   7   1   15.19    1.57 
  -6   7  -1   19.55    2.23 
  -6  -7   1   18.62    1.01 
   6  -7  -1   18.40    1.97 
   6  -7  -1   19.79    1.86 
   6  -7  -1   16.87    2.16 
  -6  -7   1   18.89    1.09 
  -6   7  -1   15.15    2.13 
  -6   7  -1   18.83    1.90 
   6   7   1   14.47    1.51 
   6  -7  -1   17.88    0.92 
  -6  -7   1   18.21    1.15 
   6  -7  -1   18.03    1.74 
  -6   7  -1   18.71    1.98 
  -7  -7  -1   61.91    2.45 
  -7  -7  -1   58.58    2.31 
  -7  -7  -1   62.44    2.42 
  -7   7   1   68.92    3.24 
  -7   7   1   64.30    3.20 
   7  -7   1   64.99    3.23 
   7  -7   1   62.87    3.36 
   7  -7   1   66.14    3.11 
   7   7  -1   63.50    2.10 
   7   7  -1   69.74    3.15 
  -7  -7  -1   65.22    2.47 
  -7   7   1   61.48    3.02 
   7   7  -1   59.80    2.21 
   7   7  -1   60.18    2.08 
   7  -7   1   59.82    2.10 
  -7   7   1   63.01    3.42 
  -7   7   1   60.66    3.03 
   7  -7   1   62.95    3.14 
   7  -7   1   61.58    2.98 
   7  -7   1   70.11    3.27 
   7  -7  -1   59.34    2.90 
   7  -7  -1   60.52    2.97 
  -7   7  -1   62.51    3.39 
   7  -7  -1   60.94    2.87 
  -7   7  -1   57.24    2.90 
   7   7   1   57.79    2.29 
  -7   7  -1   64.48    3.20 
  -7  -7   1   58.44    2.06 
  -7  -7   1   61.89    2.20 
   7  -7  -1   57.56    3.00 
  -7  -7   1   59.63    2.11 
  -7   7  -1   59.30    2.99 
  -7  -7   1   61.34    2.16 
  -7  -7   1   61.08    2.91 
   7   7   1   59.31    2.31 
  -7  -7   1   62.62    2.01 
   7   7   1   58.73    2.37 
  -7   7  -1   60.42    3.20 
   7  -7  -1   61.81    3.12 
   7  -7  -1   59.48    3.35 
   7   7   1   62.89    3.07 
  -7   7  -1   60.59    2.93 
  -8   7   1    1.20    1.57 
  -8  -7  -1   -0.30    0.78 
  -8   7   1    0.03    1.08 
  -8  -7  -1    0.83    0.88 
  -8  -7  -1   -1.02    0.80 
   8  -7   1   -1.62    1.30 
   8  -7   1    1.70    1.58 
   8  -7   1    0.30    1.46 
  -8   7   1   -0.11    1.31 
   8  -7   1    1.11    1.23 
   8  -7   1   -0.99    1.32 
   8   7  -1    0.95    0.77 
  -8  -7  -1   -0.39    0.77 
   8   7  -1   -0.46    0.60 
   8  -7   1    1.98    1.39 
   8  -7   1    0.30    0.59 
   8   7  -1    0.68    1.36 
  -8   7   1    0.82    1.40 
   8   7  -1   -0.25    0.63 
  -8   7   1    0.79    1.27 
  -8  -7   1   -0.96    0.71 
   8  -7  -1   -0.92    1.50 
  -8  -7   1   -0.09    0.72 
   8   7   1   -0.23    0.76 
   8   7   1    1.35    1.33 
   8  -7  -1   -0.67    1.15 
   8  -7  -1   -2.17    1.25 
  -8   7  -1    0.85    1.31 
  -8   7  -1    0.10    2.15 
   8  -7  -1    1.58    1.30 
   8   7   1   -1.04    0.77 
   8  -7  -1    1.10    1.36 
   8  -7  -1    0.73    1.17 
  -8  -7   1   -1.20    0.61 
  -8  -7   1    0.13    0.68 
  -8  -7   1    0.55    0.78 
  -8   7  -1    1.90    1.51 
  -8   7  -1   -0.63    1.19 
  -8   7  -1    0.45    1.41 
  -8   7  -1    1.49    1.42 
  -9  -7  -1    0.66    0.95 
  -9   7   1    0.11    1.44 
  -9   7   1   -2.51    1.53 
   9  -7   1   -0.53    1.59 
  -9   7   1   -0.73    1.53 
   9   7  -1    1.41    0.89 
   9  -7   1    1.06    0.60 
  -9  -7  -1    0.20    0.99 
  -9   7   1    1.63    1.42 
   9   7  -1    1.94    1.51 
  -9   7   1   -0.19    1.60 
   9   7  -1   -0.06    0.70 
   9  -7   1   -1.24    1.62 
   9  -7   1    0.21    1.51 
  -9  -7  -1    0.45    0.91 
   9  -7   1    0.43    1.34 
   9  -7   1   -0.01    1.66 
  -9  -7  -1    1.73    1.01 
   9  -7   1    2.27    1.67 
   9   7  -1    1.48    0.75 
  -9   7   1    0.90    1.28 
   9   7   1    1.77    1.06 
  -9  -7   1    0.15    0.88 
   9   7   1   -0.83    1.42 
  -9  -7   1    0.12    0.78 
   9  -7  -1   -1.25    1.45 
   9  -7  -1   -0.53    1.44 
  -9  -7   1    0.93    0.82 
  -9  -7   1   -1.08    0.75 
  -9   7  -1    0.52    1.48 
  -9   7  -1   -1.52    1.29 
   9   7   1    0.31    0.94 
   9  -7  -1   -1.49    1.52 
  -9   7  -1    0.94    1.41 
  -9   7  -1    2.00    1.80 
  -9  -7   1   -0.91    0.71 
   9  -7  -1   -1.61    1.45 
   9   7   1    0.05    0.86 
   9  -7  -1    0.35    1.75 
  -9   7  -1   -2.09    1.58 
  -9   7  -1    2.65    1.58 
   9  -7  -1    0.68    1.31 
  10  -7   1    1.50    2.01 
  10   7  -1    1.06    1.63 
 -10   7   1    1.89    1.88 
 -10   7   1    4.85    1.84 
 -10  -7  -1    5.12    1.22 
 -10   7   1    6.13    1.89 
 -10  -7  -1    5.45    2.12 
 -10  -7  -1    5.52    1.33 
  10  -7   1    5.56    2.03 
  10   7  -1    1.61    2.87 
  10  -7   1    5.79    2.02 
 -10   7   1    2.05    1.53 
 -10  -7  -1    2.78    1.09 
  10   7  -1    4.06    1.11 
  10  -7   1    1.57    2.27 
  10   7  -1    3.05    0.90 
 -10   7   1    4.73    2.14 
 -10   7   1    4.90    1.73 
  10   7  -1    3.91    0.93 
 -10   7  -1    4.01    2.05 
 -10  -7   1    5.82    1.16 
 -10   7  -1    3.92    1.76 
 -10   7  -1    6.37    1.79 
 -10   7  -1    5.83    1.91 
 -10  -7   1    5.06    1.02 
 -10   7  -1    4.18    2.10 
 -10  -7   1    5.89    1.02 
  10  -7  -1    6.19    2.03 
  10   7   1    7.96    1.95 
  10  -7  -1    2.21    2.22 
  10  -7  -1   10.18    2.07 
 -10  -7   1    6.67    1.14 
  10   7   1    4.28    1.31 
  10  -7  -1    4.84    1.82 
  10   7   1    4.95    2.11 
 -10  -7   1    6.04    1.06 
  10   7   1    4.29    1.11 
  10   7   1    3.67    1.22 
 -10   7  -1    7.25    2.04 
 -11  -7  -1    7.53    1.45 
  11   7  -1    9.41    1.45 
  11  -7   1    3.91    2.96 
  11   7  -1    8.23    1.17 
 -11   7   1   12.21    2.67 
 -11   7   1    7.51    2.25 
  11   7  -1    7.94    1.55 
 -11   7   1    7.23    2.35 
 -11   7   1    6.83    2.25 
 -11   7   1    6.34    2.15 
 -11  -7  -1    7.93    1.64 
  11   7  -1    6.89    2.04 
  11  -7   1   14.11    2.47 
 -11  -7  -1    5.78    1.35 
 -11   7   1    6.05    1.94 
 -11  -7  -1    6.36    1.42 
  11   7   1   10.75    1.43 
  11  -7  -1    8.72    2.26 
  11   7   1    8.51    2.50 
 -11  -7   1    7.20    1.17 
 -11   7  -1    7.48    2.22 
 -11  -7   1    7.09    1.29 
  11  -7  -1    8.82    2.23 
 -11   7  -1    7.45    2.03 
 -11   7  -1    0.76    2.20 
 -11  -7   1    7.49    1.38 
 -11   7  -1    8.29    2.21 
 -11   7  -1    3.64    2.26 
 -11  -7   1    7.17    1.38 
  11   7   1    4.04    1.94 
  11   7   1    7.64    1.64 
 -11   7  -1    5.72    2.35 
  12   7  -1   16.63    1.95 
 -12   7   1   17.50    2.61 
 -12   7   1   22.71    3.05 
  12  -7   1   23.06    3.17 
 -12   7   1   20.81    3.40 
 -12  -7  -1   20.93    2.63 
 -12   7   1   23.85    2.98 
 -12   7   1   29.07    3.78 
 -12  -7  -1   24.73    2.68 
  12   7  -1   23.12    2.77 
 -12   7  -1   16.83    2.88 
 -12   7  -1   18.36    4.30 
  12  -7  -1   23.96    3.12 
 -12   7  -1   26.98    3.54 
 -12  -7   1   19.91    2.29 
 -12  -7   1   20.29    2.56 
 -12  -7   1   20.13    2.11 
  12   7   1   18.43    2.78 
 -12   7  -1   18.64    2.86 
 -12   7  -1   31.10    4.27 
  13   7  -1   30.04    3.36 
 -13   7   1   27.19    3.70 
 -13  -7  -1   26.42    3.02 
 -13   7   1   24.85    4.19 
 -13   7  -1   23.60    3.59 
 -13  -7   1   21.29    2.60 
 -13   7  -1   24.05    3.77 
  13   7   1   25.64    3.29 
   0  -8  -1   83.01    3.05 
   0  -8  -1   83.39    2.87 
   0   8  -1   81.77    2.72 
   0  -8   1   83.24    3.07 
   0   8   1   82.54    2.99 
   0  -8   1   87.80    2.86 
   0   8  -1   81.00    2.74 
   0  -8  -1   81.49    2.86 
   0   8   1   82.18    2.75 
   0   8   1   81.75    2.94 
   0   8  -1   84.98    2.81 
   0   8   1   82.88    2.78 
   0  -8   1   84.05    2.81 
   0   8   1   86.55    2.89 
   0   8   1   81.30    2.78 
   0  -8  -1   79.59    2.86 
   0  -8   1   82.11    2.79 
   0  -8   1   81.40    2.91 
   0   8  -1   79.98    2.98 
   0  -8  -1   81.35    2.75 
   0  -8   1   82.71    2.77 
   0  -8   1   82.94    2.77 
   0   8  -1   81.67    2.95 
   0  -8  -1   80.86    2.88 
   0   8  -1   82.14    2.77 
   0  -8  -1   82.24    2.87 
  -1  -8  -1  158.03    4.56 
   1   8  -1  159.26    4.43 
  -1  -8  -1  155.15    4.80 
  -1  -8  -1  158.20    4.73 
  -1   8   1  157.61    4.59 
   1  -8   1  155.86    4.64 
  -1  -8  -1  155.22    4.34 
   1  -8   1  162.68    4.67 
   1   8  -1  158.50    4.79 
  -1   8   1  160.76    4.66 
   1   8  -1  159.28    4.44 
   1  -8   1  161.21    4.64 
   1  -8   1  155.43    4.63 
  -1   8   1  158.12    4.68 
  -1  -8  -1  159.44    4.58 
   1  -8   1  155.17    4.61 
   1  -8   1  160.37    4.70 
  -1  -8  -1  157.50    4.56 
  -1   8   1  159.34    4.72 
   1  -8   1  158.04    4.83 
  -1   8   1  155.96    4.63 
  -1   8   1  154.50    4.68 
  -1   8   1  160.24    4.74 
  -1  -8  -1  161.09    4.60 
   1   8  -1  163.32    4.51 
   1  -8  -1  154.41    4.48 
   1   8   1  147.84    4.32 
  -1   8  -1  146.49    4.33 
   1  -8  -1  147.60    4.46 
   1  -8  -1  152.33    4.47 
   1   8   1  146.77    4.28 
   1  -8  -1  148.45    4.40 
   1   8   1  149.69    4.51 
   1   8   1  144.36    4.30 
   1  -8  -1  143.67    4.32 
   1  -8  -1  149.01    4.45 
  -1  -8   1  146.78    4.18 
  -1  -8   1  143.38    4.52 
  -1  -8   1  145.37    4.23 
   1  -8  -1  147.15    4.54 
  -1   8  -1  144.91    4.34 
  -1  -8   1  146.31    4.21 
  -1  -8   1  144.78    4.47 
  -1  -8   1  149.17    4.23 
  -1   8  -1  147.47    4.40 
  -1   8  -1  150.59    4.44 
  -1   8  -1  147.78    4.52 
  -1   8  -1  153.45    4.44 
  -1  -8   1  146.03    4.23 
   1   8   1  150.25    4.30 
   2  -8   1   88.26    3.18 
  -2  -8  -1   88.66    3.18 
  -2  -8  -1   85.85    2.50 
   2  -8   1   86.69    3.06 
  -2   8   1   89.53    3.17 
  -2  -8  -1   85.42    2.87 
   2   8  -1   87.71    3.18 
  -2   8   1   83.11    3.01 
  -2   8   1   82.56    2.96 
  -2  -8  -1   86.06    2.85 
   2   8  -1   85.35    2.71 
   2  -8   1   90.22    3.12 
  -2   8   1   88.66    3.09 
   2  -8   1   86.36    3.01 
  -2  -8  -1   84.82    2.83 
   2   8  -1   83.22    2.67 
  -2   8   1   87.45    3.11 
   2  -8   1   83.05    3.03 
  -2  -8  -1   89.28    3.25 
   2  -8   1   87.65    3.20 
   2  -8   1   86.95    2.90 
   2   8  -1   77.82    3.47 
   2   8  -1   86.76    2.70 
  -2  -8  -1   86.05    2.86 
  -2   8   1   86.48    2.82 
  -2   8   1   85.71    3.03 
  -2   8  -1   93.24    3.21 
   2  -8  -1   92.19    3.22 
  -2  -8   1   89.37    2.81 
   2  -8  -1   89.25    3.19 
   2  -8  -1   94.20    3.25 
  -2   8  -1   92.26    3.17 
   2   8   1   92.52    2.94 
   2  -8  -1   92.15    3.25 
  -2  -8   1   88.57    2.73 
  -2  -8   1   88.93    2.85 
  -2   8  -1   84.04    3.03 
  -2  -8   1   89.50    3.28 
  -2  -8   1   93.55    2.86 
   2   8   1   87.52    2.92 
   2   8   1   91.50    3.30 
  -2   8  -1   92.12    3.20 
  -2  -8   1   91.69    3.26 
   2  -8  -1   94.67    3.25 
  -2   8  -1   89.92    3.12 
   2  -8  -1   91.56    2.96 
   2   8   1   92.51    2.98 
  -2  -8   1   91.05    2.85 
  -2   8  -1   88.70    3.28 
   2  -8  -1   96.82    3.28 
   3  -8   1   54.85    2.14 
   3  -8   1   55.09    2.48 
  -3  -8  -1   54.16    2.13 
   3   8  -1   53.04    1.94 
  -3  -8  -1   57.44    2.14 
   3   8  -1   55.95    1.97 
  -3   8   1   56.18    2.59 
  -3   8   1   52.39    2.40 
   3  -8   1   57.71    2.52 
  -3  -8  -1   53.88    2.47 
  -3   8   1   59.61    2.57 
   3  -8   1   54.38    2.38 
  -3   8   1   56.06    2.36 
  -3   8   1   53.53    2.31 
   3  -8   1   56.24    2.62 
   3   8  -1   56.62    1.94 
   3   8  -1   53.72    1.90 
   3   8  -1   58.87    2.60 
   3  -8   1   56.32    2.48 
  -3   8   1   57.80    2.50 
  -3  -8  -1   53.61    2.09 
  -3  -8  -1   54.86    1.59 
   3  -8   1   58.52    2.56 
   3  -8  -1   68.99    2.74 
   3  -8  -1   70.90    2.81 
  -3   8  -1   70.29    2.82 
   3   8   1   66.25    2.38 
  -3   8  -1   71.68    2.82 
   3   8   1   69.89    2.40 
  -3   8  -1   61.59    2.64 
  -3  -8   1   68.57    2.26 
   3   8   1   66.25    2.35 
   3  -8  -1   65.82    2.74 
  -3  -8   1   63.26    2.21 
  -3   8  -1   65.90    2.65 
  -3  -8   1   67.10    2.83 
  -3  -8   1   68.61    2.23 
   3   8   1   64.24    2.76 
  -3   8  -1   68.13    2.61 
   3  -8  -1   67.78    2.77 
   3  -8  -1   66.50    2.31 
  -3  -8   1   67.71    2.08 
   3  -8  -1   66.09    2.70 
   3  -8  -1   66.86    2.80 
   3   8   1   65.29    2.32 
  -3  -8   1   64.67    2.73 
  -3   8  -1   67.52    2.88 
  -3  -8   1   63.77    2.53 
   4  -8   1   21.68    1.39 
  -4   8   1   22.93    1.97 
   4   8  -1   23.53    1.21 
  -4   8   1   22.90    1.70 
   4   8  -1   26.01    1.28 
  -4  -8  -1   27.70    1.50 
  -4  -8  -1   25.62    1.39 
  -4  -8  -1   24.07    1.97 
  -4   8   1   25.89    1.86 
  -4   8   1   23.99    1.72 
   4  -8   1   23.03    1.95 
  -4   8   1   22.67    2.07 
   4  -8   1   24.14    1.96 
   4   8  -1   26.31    1.98 
  -4  -8  -1   25.66    1.50 
   4  -8   1   24.43    1.96 
   4   8  -1   22.81    1.17 
   4  -8   1   24.52    2.12 
  -4   8   1   22.90    1.99 
   4   8  -1   24.41    1.20 
  -4  -8  -1   25.83    1.48 
   4  -8   1   24.31    1.90 
   4  -8   1   23.88    1.76 
   4   8   1   22.26    1.62 
   4  -8  -1   23.85    1.32 
  -4   8  -1   25.27    2.05 
   4  -8  -1   23.64    2.39 
  -4  -8   1   25.53    1.32 
   4  -8  -1   27.21    2.03 
   4  -8  -1   25.57    1.91 
  -4   8  -1   25.36    1.77 
   4  -8  -1   25.28    1.83 
   4   8   1   26.26    1.45 
  -4  -8   1   24.51    1.22 
  -4   8  -1   23.39    1.86 
  -4  -8   1   25.74    2.01 
  -4  -8   1   19.74    2.11 
  -4  -8   1   26.39    1.28 
   4  -8  -1   23.57    1.84 
   4   8   1   25.14    1.37 
   4  -8  -1   25.72    1.95 
  -4  -8   1   23.91    1.05 
  -4   8  -1   18.45    2.10 
  -4  -8   1   26.77    1.33 
   4   8   1   27.91    1.53 
  -4   8  -1   25.62    2.11 
  -4  -8   1   26.18    1.12 
  -4   8  -1   27.75    2.02 
   4   8   1   25.24    2.03 
   5  -8   1    7.80    1.44 
   5  -8   1    8.87    1.30 
  -5   8   1   10.56    1.49 
  -5   8   1    8.36    1.39 
  -5   8   1    7.53    1.40 
   5   8  -1    8.73    0.89 
   5  -8   1    9.64    1.45 
   5  -8   1    8.03    1.08 
   5   8  -1    9.57    0.90 
   5   8  -1    8.84    1.42 
   5  -8   1    6.70    1.30 
  -5   8   1    8.80    1.46 
  -5   8   1    9.08    1.27 
  -5  -8  -1    8.91    1.21 
  -5  -8  -1    8.06    1.28 
   5  -8   1    8.05    1.32 
  -5  -8  -1    8.20    1.08 
   5  -8   1    9.01    1.35 
  -5  -8  -1   10.48    1.21 
  -5   8   1    7.91    1.50 
   5   8  -1   10.46    1.01 
  -5   8  -1    6.40    1.29 
  -5  -8   1    9.91    0.98 
   5  -8  -1   12.02    1.37 
  -5  -8   1    9.50    1.04 
  -5  -8   1    8.15    1.28 
   5  -8  -1    9.24    0.97 
   5  -8  -1    8.44    1.37 
  -5   8  -1    9.95    1.51 
   5  -8  -1    9.86    1.37 
  -5  -8   1   11.17    1.02 
   5   8   1    9.12    1.13 
  -5   8  -1    7.85    1.34 
  -5  -8   1   10.91    1.03 
  -5  -8   1    8.17    0.89 
   5   8   1   10.68    1.14 
  -5   8  -1    7.67    1.22 
   5   8   1    9.80    1.21 
   5   8   1    8.59    1.32 
   5  -8  -1   10.88    1.47 
   5  -8  -1   10.38    1.41 
   5  -8  -1    9.24    1.42 
  -5   8  -1    7.84    1.50 
  -6  -8  -1   48.03    2.07 
   6   8  -1   47.33    1.82 
   6  -8   1   43.68    2.84 
   6  -8   1   45.56    2.92 
  -6  -8  -1   45.97    2.66 
   6   8  -1   44.62    2.76 
  -6   8   1   48.09    2.67 
  -6   8   1   49.29    2.68 
   6  -8   1   46.91    2.74 
   6   8  -1   44.21    1.67 
  -6  -8  -1   47.03    2.02 
   6  -8   1   48.69    2.83 
  -6   8   1   50.26    2.82 
  -6  -8  -1   50.86    2.08 
   6  -8   1   49.41    2.72 
   6   8  -1   46.64    1.69 
  -6   8   1   47.97    2.92 
   6  -8   1   44.89    1.84 
  -6   8   1   46.29    2.64 
   6  -8   1   45.22    2.77 
  -6  -8  -1   45.69    1.93 
   6   8   1   44.63    2.03 
   6  -8  -1   46.81    2.54 
  -6  -8   1   47.17    1.79 
   6   8   1   48.32    2.77 
  -6  -8   1   47.85    1.83 
  -6   8  -1   48.23    2.51 
  -6  -8   1   43.55    1.71 
   6   8   1   38.42    2.28 
  -6   8  -1   47.81    2.68 
   6  -8  -1   47.58    2.70 
   6  -8  -1   51.85    2.80 
   6  -8  -1   47.35    2.79 
  -6   8  -1   49.45    3.02 
   6  -8  -1   48.22    2.72 
   6   8   1   47.81    1.96 
   6  -8  -1   46.75    2.88 
   6  -8  -1   44.60    1.63 
  -6  -8   1   46.11    1.81 
   6   8   1   45.02    1.95 
  -6   8  -1   43.93    2.65 
  -6   8  -1   50.09    2.75 
  -6   8  -1   45.90    2.77 
  -6  -8   1   46.21    2.66 
  -7   8   1   42.75    3.14 
  -7  -8  -1   40.23    2.00 
  -7   8   1   43.46    2.87 
   7  -8   1   37.30    1.66 
   7  -8   1   38.15    2.85 
   7  -8   1   44.74    2.89 
  -7   8   1   38.73    2.67 
   7  -8   1   41.52    2.80 
  -7  -8  -1   34.85    1.84 
  -7  -8  -1   39.34    1.96 
  -7   8   1   39.54    2.72 
  -7   8   1   37.38    2.38 
   7  -8   1   37.71    2.93 
  -7  -8  -1   41.86    2.04 
   7   8  -1   35.76    1.54 
   7   8  -1   37.08    1.59 
   7   8  -1   35.03    1.77 
   7   8  -1   40.43    2.82 
   7  -8   1   45.31    2.79 
  -7   8   1   43.63    2.87 
   7  -8   1   37.62    2.55 
   7  -8  -1   35.39    2.63 
  -7   8  -1   32.25    2.44 
  -7   8  -1   34.11    2.64 
  -7   8  -1   34.60    2.82 
   7   8   1   38.68    1.84 
  -7   8  -1   37.46    2.50 
  -7  -8   1   35.51    1.43 
   7  -8  -1   38.35    2.79 
  -7   8  -1   34.05    2.70 
   7  -8  -1   37.01    2.51 
   7  -8  -1   33.96    2.97 
   7   8   1   35.41    2.69 
   7   8   1   36.64    1.92 
  -7  -8   1   35.76    1.69 
   7   8   1   31.82    1.77 
  -7  -8   1   36.93    1.68 
   7  -8  -1   37.85    2.80 
  -7   8  -1   34.49    2.97 
   7   8   1   31.35    1.93 
   7  -8  -1   33.91    1.25 
   7  -8  -1   38.13    2.71 
  -7  -8   1   33.25    1.54 
  -7  -8   1   33.92    2.47 
   8  -8   1   58.56    3.43 
  -8  -8  -1   55.27    2.42 
  -8   8   1   50.15    3.23 
  -8  -8  -1   51.74    2.27 
   8  -8   1   54.38    3.14 
   8  -8   1   53.70    3.65 
   8  -8   1   54.02    3.13 
   8  -8   1   52.16    1.95 
   8  -8   1   56.07    3.43 
   8   8  -1   59.58    3.37 
   8  -8   1   51.87    3.29 
   8   8  -1   52.05    1.94 
   8   8  -1   55.44    1.98 
  -8  -8  -1   53.48    3.72 
   8   8  -1   54.32    2.18 
   8   8  -1   51.42    2.11 
  -8   8   1   52.61    3.31 
  -8   8   1   52.57    2.88 
  -8   8   1   64.40    3.76 
  -8  -8  -1   56.37    2.44 
  -8   8   1   55.36    3.40 
  -8   8   1   53.95    3.24 
   8   8   1   53.01    2.29 
  -8  -8   1   53.25    2.19 
   8   8   1   56.08    2.45 
  -8  -8   1   49.46    2.01 
  -8  -8   1   53.76    2.07 
  -8   8  -1   55.35    3.09 
  -8   8  -1   54.29    3.26 
  -8  -8   1   55.29    2.16 
   8  -8  -1   52.08    3.25 
   8  -8  -1   53.36    3.01 
  -8  -8   1   54.20    1.80 
  -8   8  -1   51.92    3.05 
   8  -8  -1   51.95    3.31 
  -8   8  -1   58.37    3.40 
  -8   8  -1   60.42    3.49 
   8  -8  -1   58.20    3.72 
   8  -8  -1   49.24    3.00 
   8  -8  -1   53.32    3.25 
   8   8   1   50.35    2.26 
   8   8   1   48.11    2.41 
   8   8   1   53.50    3.31 
  -8   8  -1   54.31    3.62 
   9  -8   1    4.01    1.71 
  -9   8   1    0.79    1.58 
   9  -8   1    3.49    0.68 
  -9  -8  -1    2.93    1.10 
  -9   8   1    0.73    1.51 
   9   8  -1    2.46    0.95 
   9   8  -1    1.93    2.45 
  -9   8   1    1.02    1.72 
   9  -8   1    5.29    1.55 
   9  -8   1    3.59    2.06 
  -9   8   1    1.87    1.33 
   9  -8   1    3.85    1.74 
   9   8  -1    2.57    0.89 
   9   8  -1    1.56    0.74 
  -9  -8  -1    1.81    1.05 
   9   8  -1    2.59    0.73 
  -9   8   1    0.86    1.72 
  -9  -8  -1    3.56    1.07 
   9  -8   1    1.10    1.59 
  -9  -8  -1    1.79    0.97 
   9  -8   1    1.78    1.85 
  -9   8   1    2.89    1.77 
  -9   8  -1    0.95    1.66 
   9  -8  -1    4.69    1.88 
   9   8   1    2.40    0.95 
  -9   8  -1    0.42    1.46 
   9  -8  -1    2.79    2.06 
   9   8   1    3.36    1.93 
  -9   8  -1    4.24    1.83 
   9  -8  -1    3.42    1.46 
  -9  -8   1    2.55    0.92 
   9  -8  -1    3.30    1.77 
  -9   8  -1    3.00    1.77 
   9   8   1   -0.27    1.03 
  -9  -8   1    3.16    0.64 
   9  -8  -1    4.41    1.69 
   9  -8  -1    4.10    1.76 
   9   8   1    3.01    1.02 
  -9  -8   1    4.74    0.98 
  -9  -8   1    3.75    0.87 
  -9   8  -1    1.98    1.64 
   9   8   1    1.62    1.10 
  -9   8  -1    4.60    1.85 
 -10   8   1   30.94    3.03 
 -10   8   1   31.13    3.37 
  10   8  -1   29.99    1.64 
  10   8  -1   28.74    2.02 
  10   8  -1   27.90    3.21 
  10  -8   1   26.21    3.38 
  10  -8   1   38.53    3.90 
  10   8  -1   28.50    1.93 
 -10  -8  -1   27.88    2.03 
  10  -8   1   32.51    3.13 
 -10   8   1   27.67    3.11 
 -10   8   1   24.94    2.81 
  10   8  -1   26.37    1.62 
 -10   8   1   34.04    3.45 
 -10  -8  -1   32.44    2.35 
 -10  -8  -1   32.82    2.32 
 -10   8   1   25.98    3.27 
  10   8   1   33.34    2.34 
 -10  -8   1   30.39    1.97 
 -10  -8   1   29.32    1.85 
 -10  -8   1   31.28    1.83 
 -10   8  -1   26.36    2.93 
  10  -8  -1   33.46    3.04 
  10  -8  -1   31.35    3.50 
  10   8   1   34.77    3.37 
  10  -8  -1   30.14    3.39 
  10   8   1   30.89    2.43 
 -10   8  -1   30.68    3.52 
 -10  -8   1   29.39    2.10 
 -10   8  -1   35.18    3.45 
 -10   8  -1   30.97    3.22 
  10   8   1   23.81    2.05 
 -10   8  -1   41.59    3.52 
  10   8   1   26.78    2.34 
 -11   8   1    5.01    2.24 
 -11  -8  -1    8.86    1.51 
 -11   8   1    6.14    2.37 
  11  -8   1    8.41    2.54 
 -11  -8  -1    7.33    1.47 
 -11  -8  -1    9.97    1.76 
 -11   8   1    6.82    2.37 
  11   8  -1   10.13    2.28 
 -11   8   1    9.44    2.54 
 -11   8   1    9.55    2.61 
  11  -8   1    3.73    2.41 
 -11   8   1    2.23    1.87 
  11   8  -1    7.64    1.35 
 -11  -8  -1    6.97    1.60 
  11   8  -1    8.14    1.03 
  11   8   1    4.42    1.64 
  11  -8  -1    1.71    2.18 
  11   8   1    2.99    2.13 
 -11  -8   1    5.78    1.05 
 -11   8  -1    4.59    2.16 
 -11  -8   1    6.72    1.35 
  11  -8  -1    9.33    2.50 
 -11   8  -1    3.72    2.37 
 -11   8  -1    5.13    2.28 
 -11   8  -1    9.98    2.60 
 -11   8  -1    5.84    2.26 
 -11  -8   1    4.07    1.21 
 -11  -8   1    8.42    1.16 
 -11   8  -1    2.99    2.28 
  11   8   1    4.65    1.79 
  11   8   1    3.91    1.35 
 -12   8   1    2.53    2.46 
  12   8  -1   -0.32    1.63 
 -12   8   1    4.51    2.33 
 -12  -8  -1   -1.42    1.47 
 -12   8   1   -0.57    2.30 
 -12   8   1    4.09    3.19 
 -12   8   1   -2.00    2.50 
  12   8  -1    7.49    2.52 
 -12  -8  -1    2.05    1.49 
  12  -8   1   -1.86    2.60 
 -12   8  -1    4.96    2.91 
 -12   8  -1   -3.73    2.46 
 -12  -8   1    2.31    1.17 
 -12  -8   1    2.55    1.45 
 -12   8  -1   -1.40    2.36 
  12  -8  -1   -3.19    2.71 
 -12   8  -1    0.10    3.02 
 -12  -8   1    3.77    1.32 
  12   8   1    4.27    2.46 
   0  -9  -1   48.90    2.19 
   0  -9  -1   53.00    2.45 
   0   9   1   49.56    2.14 
   0  -9  -1   48.00    2.19 
   0  -9   1   50.81    2.45 
   0  -9  -1   49.74    2.24 
   0  -9   1   45.72    2.05 
   0   9  -1   48.01    2.05 
   0   9  -1   47.09    2.10 
   0   9  -1   46.90    2.23 
   0   9  -1   48.60    2.13 
   0   9  -1   51.62    2.37 
   0  -9   1   51.23    2.13 
   0  -9  -1   50.04    2.26 
   0  -9   1   45.34    2.24 
   0  -9   1   48.04    2.09 
   0   9   1   52.08    2.16 
   0   9   1   49.89    2.13 
   0  -9  -1   49.14    2.06 
   0   9   1   51.18    2.25 
   0   9   1   48.41    2.31 
   0   9  -1   46.27    2.01 
   0  -9  -1   47.38    2.15 
   0  -9   1   47.43    2.14 
   0  -9   1   45.22    2.08 
   0   9   1   47.34    2.09 
  -1  -9  -1   51.61    2.43 
  -1   9   1   46.85    2.25 
  -1  -9  -1   49.25    2.34 
   1   9  -1   51.29    2.42 
   1  -9   1   43.92    2.06 
   1   9  -1   47.89    1.97 
  -1   9   1   53.77    2.33 
  -1   9   1   50.09    2.34 
   1  -9   1   50.56    2.21 
   1   9  -1   46.51    2.02 
  -1  -9  -1   46.03    1.89 
   1   9  -1   48.26    1.99 
  -1   9   1   47.77    2.19 
   1  -9   1   46.83    2.20 
  -1   9   1   51.15    2.23 
  -1  -9  -1   45.52    2.10 
   1  -9   1   52.71    2.26 
   1  -9   1   49.42    2.29 
  -1  -9  -1   47.31    2.14 
  -1   9   1   50.21    2.20 
   1  -9   1   48.76    2.44 
  -1   9   1   50.16    2.32 
  -1  -9  -1   47.78    2.12 
   1  -9   1   50.63    2.28 
  -1  -9  -1   50.01    2.13 
  -1  -9   1   43.69    1.91 
   1  -9  -1   48.40    2.27 
   1   9   1   43.87    1.99 
  -1  -9   1   50.32    2.42 
   1   9   1   46.35    1.99 
   1   9   1   40.56    1.96 
   1  -9  -1   43.76    2.13 
   1  -9  -1   45.99    2.22 
   1   9   1   48.16    2.09 
   1  -9  -1   46.56    2.33 
  -1   9  -1   46.79    2.17 
   1   9   1   46.31    2.32 
   1  -9  -1   45.35    2.16 
  -1   9  -1   43.33    2.18 
  -1  -9   1   47.38    1.96 
   1  -9  -1   45.72    2.07 
  -1   9  -1   43.58    2.04 
  -1   9  -1   47.73    2.21 
  -1   9  -1   42.24    2.05 
  -1  -9   1   41.55    1.93 
  -1  -9   1   46.22    2.01 
   1  -9  -1   44.73    2.07 
  -1  -9   1   46.96    2.26 
  -1  -9   1   41.64    1.88 
  -1   9  -1   45.55    2.21 
  -2  -9  -1   31.43    1.99 
   2  -9   1   31.78    1.91 
   2  -9   1   32.35    2.05 
  -2  -9  -1   33.53    1.76 
  -2  -9  -1   28.35    1.99 
  -2   9   1   35.23    2.06 
  -2   9   1   32.87    1.94 
  -2  -9  -1   29.98    1.36 
   2  -9   1   33.48    2.05 
   2   9  -1   30.61    1.53 
  -2  -9  -1   31.91    1.72 
  -2   9   1   29.18    1.82 
  -2  -9  -1   30.56    1.70 
  -2   9   1   31.84    1.86 
   2  -9   1   31.61    1.78 
   2  -9   1   30.61    1.96 
   2  -9   1   32.90    1.97 
  -2   9   1   31.46    1.74 
  -2  -9  -1   35.78    1.79 
   2   9  -1   31.23    1.52 
  -2   9   1   29.04    1.79 
   2  -9   1   33.77    1.94 
  -2   9   1   32.64    2.07 
   2   9  -1   32.32    2.06 
   2   9  -1   30.02    1.56 
   2   9  -1   33.53    1.64 
   2  -9  -1   25.52    1.76 
  -2   9  -1   29.97    1.93 
  -2  -9   1   31.37    2.10 
  -2  -9   1   28.67    1.53 
  -2  -9   1   28.70    1.53 
   2  -9  -1   30.59    2.03 
   2  -9  -1   30.44    1.97 
  -2  -9   1   29.99    1.44 
   2   9   1   29.03    1.87 
   2   9   1   29.32    1.63 
  -2   9  -1   30.04    1.90 
  -2  -9   1   28.44    1.58 
  -2   9  -1   32.87    1.99 
  -2  -9   1   29.71    2.03 
   2   9   1   29.94    1.61 
  -2   9  -1   29.11    2.05 
   2  -9  -1   27.47    1.66 
   2  -9  -1   30.54    2.02 
   2   9   1   33.80    2.11 
   2  -9  -1   30.71    1.92 
  -2   9  -1   24.51    2.07 
  -2  -9   1   28.97    1.56 
  -2   9  -1   30.24    1.84 
   2  -9  -1   31.38    1.92 
   3  -9   1   35.42    2.20 
   3   9  -1   32.59    1.55 
  -3  -9  -1   36.28    1.76 
  -3   9   1   33.28    1.95 
  -3  -9  -1   34.22    1.73 
  -3  -9  -1   37.35    2.28 
  -3  -9  -1   36.34    1.81 
   3  -9   1   36.41    2.14 
   3   9  -1   26.91    1.94 
  -3  -9  -1   31.30    1.72 
  -3   9   1   35.38    2.15 
   3  -9   1   34.75    2.01 
  -3  -9  -1   33.14    1.20 
   3  -9   1   32.98    1.94 
  -3   9   1   29.35    2.33 
   3   9  -1   32.45    1.51 
   3  -9   1   36.36    2.19 
   3   9  -1   37.41    2.28 
   3  -9   1   32.24    1.75 
  -3   9   1   34.56    2.27 
   3  -9   1   30.86    3.11 
  -3   9   1   37.24    2.25 
  -3   9   1   31.36    2.05 
   3   9  -1   29.80    1.53 
  -3  -9  -1   33.30    2.12 
   3   9   1   23.43    1.50 
  -3  -9   1   25.29    2.00 
   3   9   1   20.40    1.45 
   3  -9  -1   25.68    2.00 
  -3  -9   1   26.09    1.41 
   3  -9  -1   24.62    1.89 
  -3  -9   1   23.12    1.19 
  -3   9  -1   22.93    2.06 
   3  -9  -1   22.20    2.00 
   3   9   1   24.55    1.49 
   3   9   1   27.03    2.07 
   3  -9  -1   21.87    1.83 
   3  -9  -1   24.53    1.96 
  -3  -9   1   22.87    1.42 
  -3  -9   1   22.77    1.36 
  -3   9  -1   22.56    1.98 
  -3   9  -1   26.92    2.00 
  -3   9  -1   23.53    1.80 
   3  -9  -1   23.27    1.51 
   3   9   1   21.64    1.40 
  -3  -9   1   23.69    1.92 
  -3   9  -1   28.42    1.95 
  -3   9  -1   23.02    1.79 
   3  -9  -1   27.17    1.96 
   4  -9   1   32.10    1.74 
  -4   9   1   33.24    2.01 
   4   9  -1   37.25    2.36 
  -4   9   1   35.25    2.37 
  -4  -9  -1   34.99    1.73 
   4   9  -1   33.87    1.57 
  -4   9   1   35.94    2.44 
  -4   9   1   34.74    2.05 
   4  -9   1   33.70    2.28 
   4   9  -1   33.56    1.50 
   4  -9   1   29.69    2.57 
   4   9  -1   31.09    1.52 
   4  -9   1   32.40    2.32 
  -4  -9  -1   30.27    1.73 
   4  -9   1   29.61    2.12 
  -4   9   1   33.64    2.35 
   4   9  -1   31.97    1.45 
  -4   9   1   29.48    2.08 
   4  -9   1   34.23    2.13 
  -4  -9  -1   31.46    1.65 
   4  -9   1   34.69    2.32 
  -4  -9  -1   29.96    2.24 
  -4   9  -1   36.44    2.34 
   4  -9  -1   31.61    1.63 
   4   9   1   33.33    1.97 
   4  -9  -1   38.76    2.36 
   4  -9  -1   32.93    2.36 
   4   9   1   32.82    1.70 
  -4  -9   1   35.97    1.60 
  -4   9  -1   32.42    2.13 
   4   9   1   36.37    2.33 
   4   9   1   30.31    1.63 
  -4   9  -1   35.91    2.07 
   4  -9  -1   33.72    2.20 
  -4   9  -1   31.18    2.08 
  -4   9  -1   33.96    2.42 
  -4  -9   1   30.61    1.28 
   4  -9  -1   33.51    2.31 
  -4  -9   1   35.14    2.33 
  -4   9  -1   32.06    2.16 
  -4  -9   1   34.17    2.29 
  -4  -9   1   31.98    1.49 
   4  -9  -1   33.76    2.22 
  -4  -9   1   35.77    1.65 
   4  -9  -1   32.16    2.21 
  -4  -9   1   33.54    1.59 
  -4  -9   1   34.48    1.36 
   4   9   1   38.67    1.79 
  -5   9   1   48.19    2.71 
  -5  -9  -1   48.47    2.70 
   5   9  -1   50.75    1.84 
  -5  -9  -1   52.02    2.22 
  -5  -9  -1   51.52    2.16 
   5  -9   1   51.49    2.94 
   5   9  -1   48.26    1.80 
  -5   9   1   47.39    2.84 
   5   9  -1   48.68    2.80 
  -5  -9  -1   50.92    2.14 
   5  -9   1   46.16    2.06 
   5  -9   1   50.09    2.73 
  -5   9   1   47.09    2.69 
  -5   9   1   48.32    2.67 
   5   9  -1   49.37    1.92 
  -5   9   1   53.91    3.02 
  -5  -9  -1   50.71    2.07 
   5  -9   1   47.71    2.81 
   5  -9   1   46.35    2.57 
   5  -9   1   53.21    2.72 
  -5   9   1   46.19    3.42 
   5  -9   1   49.60    2.64 
  -5   9  -1   52.11    2.94 
  -5  -9   1   53.48    2.01 
   5  -9  -1   51.64    2.86 
   5  -9  -1   52.64    2.87 
   5   9   1   55.06    2.13 
   5   9   1   52.26    2.26 
  -5   9  -1   50.97    2.74 
  -5   9  -1   50.51    2.58 
  -5  -9   1   53.14    2.89 
  -5  -9   1   53.17    1.99 
  -5  -9   1   48.13    1.55 
  -5   9  -1   50.79    2.58 
  -5  -9   1   51.11    2.72 
   5  -9  -1   50.75    1.97 
   5  -9  -1   56.01    2.72 
   5  -9  -1   46.33    2.78 
   5  -9  -1   47.83    2.60 
  -5  -9   1   48.64    1.91 
  -5   9  -1   47.94    2.73 
  -5  -9   1   50.50    1.88 
   5  -9  -1   51.86    2.88 
   5   9   1   52.89    2.20 
   5   9   1   55.69    2.90 
   5   9   1   51.05    2.08 
  -5   9  -1   47.62    2.71 
   6  -9   1    1.10    1.25 
  -6  -9  -1    4.39    0.90 
   6  -9   1    2.60    1.41 
   6  -9   1    4.25    1.38 
   6   9  -1    3.47    0.66 
   6   9  -1    3.69    0.83 
   6  -9   1    1.61    1.24 
  -6  -9  -1    2.85    1.23 
  -6  -9  -1    3.59    0.81 
   6   9  -1    4.06    0.64 
   6  -9   1    3.91    0.83 
   6  -9   1    3.75    1.37 
  -6  -9  -1    4.21    0.90 
  -6   9   1    2.57    1.34 
  -6   9   1    2.43    1.09 
  -6   9   1    3.97    1.30 
  -6   9   1    4.51    1.46 
  -6   9   1    1.11    1.36 
  -6   9   1    3.65    1.43 
   6  -9   1    4.99    1.43 
   6   9  -1    3.23    1.42 
  -6  -9   1    5.02    0.73 
  -6  -9   1    6.06    0.80 
  -6  -9   1    5.48    1.43 
   6   9   1    5.73    0.94 
   6   9   1    6.22    0.90 
   6  -9  -1    4.71    1.40 
  -6   9  -1    6.49    1.65 
   6  -9  -1    4.78    1.33 
  -6  -9   1    6.08    0.80 
  -6   9  -1    4.42    1.26 
   6  -9  -1    5.77    0.75 
  -6   9  -1    4.91    1.39 
   6  -9  -1    3.67    1.51 
   6   9   1    5.66    1.53 
   6  -9  -1    3.02    1.36 
   6   9   1    4.43    0.83 
   6  -9  -1    3.32    1.31 
  -6   9  -1    5.52    1.43 
  -6   9  -1    8.49    1.72 
   6  -9  -1    7.06    1.38 
  -6   9  -1    2.51    1.35 
   7   9  -1   56.53    2.13 
  -7  -9  -1   60.03    2.43 
   7  -9   1   57.67    3.41 
   7  -9   1   56.66    3.33 
   7   9  -1   57.71    2.20 
   7  -9   1   59.34    3.30 
  -7   9   1   52.21    5.20 
   7  -9   1   64.70    3.73 
  -7  -9  -1   58.32    2.33 
  -7   9   1   56.18    3.40 
  -7   9   1   57.96    2.94 
  -7  -9  -1   57.35    2.42 
   7   9  -1   55.38    2.00 
   7   9  -1   60.49    3.45 
   7  -9   1   63.01    3.22 
   7  -9   1   62.50    3.43 
  -7  -9  -1   59.98    2.49 
   7  -9   1   59.94    2.21 
  -7   9   1   56.90    3.25 
  -7   9   1   60.58    3.35 
  -7   9   1   57.28    3.42 
   7   9  -1   58.61    2.03 
  -7  -9   1   62.97    3.36 
  -7  -9   1   66.83    2.28 
   7   9   1   69.75    3.56 
   7   9   1   60.09    2.45 
   7  -9  -1   68.88    3.24 
  -7   9  -1   65.68    3.60 
  -7  -9   1   68.19    2.40 
  -7   9  -1   70.14    3.61 
   7  -9  -1   68.71    3.57 
   7  -9  -1   62.30    3.75 
  -7  -9   1   68.55    2.37 
  -7  -9   1   61.13    2.21 
   7   9   1   68.41    2.63 
   7   9   1   63.77    2.50 
   7  -9  -1   63.49    2.05 
   7  -9  -1   67.28    3.49 
  -7   9  -1   63.41    5.62 
  -7   9  -1   64.13    3.25 
   7  -9  -1   71.64    3.62 
   7  -9  -1   61.39    3.43 
   7   9   1   61.65    2.64 
  -7   9  -1   67.11    3.42 
   8   9  -1   11.20    1.13 
  -8  -9  -1   12.28    1.31 
  -8   9   1    9.16    1.55 
   8   9  -1   10.86    1.11 
  -8   9   1   13.61    2.06 
  -8   9   1    7.98    1.74 
  -8   9   1   13.30    2.01 
   8  -9   1   12.18    1.86 
   8  -9   1    9.39    1.23 
  -8  -9  -1   12.19    1.58 
   8  -9   1    7.25    2.14 
  -8  -9  -1    9.47    1.12 
   8  -9   1   10.47    1.97 
   8  -9   1    9.50    1.86 
  -8   9   1   10.35    1.82 
   8   9  -1    8.91    1.10 
   8  -9   1    9.01    1.89 
   8   9  -1   11.29    2.81 
   8  -9   1   11.56    1.95 
   8   9  -1    9.66    1.27 
  -8  -9  -1   10.56    1.22 
  -8   9   1   11.46    2.14 
   8  -9  -1   11.22    1.91 
   8   9   1   11.08    1.53 
  -8  -9   1   16.32    1.47 
  -8   9  -1   13.26    1.83 
  -8   9  -1   13.43    2.07 
  -8   9  -1   15.01    2.28 
   8  -9  -1   11.74    1.91 
  -8  -9   1   13.47    1.91 
   8   9   1   11.51    1.49 
   8  -9  -1   11.02    2.00 
   8   9   1   11.54    1.30 
  -8   9  -1   11.74    1.89 
  -8  -9   1   12.49    1.30 
   8  -9  -1   12.58    1.97 
   8   9   1   14.17    1.73 
  -8   9  -1   13.95    2.28 
   8   9   1   11.29    2.42 
  -8   9  -1   14.22    2.06 
   8  -9  -1   15.21    1.86 
   8  -9  -1    9.94    2.23 
   9   9  -1   10.06    1.10 
   9   9  -1   12.22    2.11 
   9   9  -1   10.81    1.43 
  -9   9   1    8.52    1.69 
   9  -9   1   11.63    1.13 
  -9  -9  -1   13.29    1.75 
   9  -9   1    6.57    2.40 
   9  -9   1   12.71    2.33 
  -9  -9  -1   11.07    1.57 
  -9   9   1   12.37    2.25 
  -9   9   1   11.32    2.23 
  -9  -9  -1   11.77    1.39 
   9   9  -1   11.74    1.22 
  -9   9   1   12.37    2.31 
   9  -9   1   11.04    2.07 
  -9  -9  -1   12.29    1.37 
  -9   9   1   11.33    2.23 
   9  -9   1    7.98    2.05 
   9   9  -1   13.32    1.57 
   9   9   1    8.21    1.14 
  -9  -9   1   10.76    1.18 
   9   9   1   12.05    2.12 
   9   9   1    8.92    1.20 
   9   9   1    9.57    1.35 
  -9   9  -1    6.37    1.77 
   9  -9  -1    7.91    2.21 
  -9  -9   1    8.88    1.08 
  -9   9  -1   11.97    2.18 
  -9   9  -1   10.00    2.05 
   9  -9  -1    9.03    2.21 
  -9   9  -1    7.40    2.07 
  -9   9  -1   14.91    2.27 
   9  -9  -1   10.68    2.24 
   9  -9  -1    7.34    2.34 
  -9  -9   1   10.23    1.30 
  -9   9  -1    7.85    2.26 
   9  -9  -1    8.00    2.04 
   9   9   1   10.77    1.39 
   9  -9  -1   11.14    1.79 
  10   9  -1    8.75    0.86 
 -10  -9  -1   11.97    1.49 
 -10   9   1   14.70    2.51 
 -10   9   1    8.89    2.51 
 -10   9   1    7.84    1.88 
 -10  -9  -1    7.58    1.40 
  10   9  -1    8.55    1.14 
  10   9  -1    8.12    2.21 
  10   9  -1    9.71    1.14 
  10  -9   1    8.92    1.96 
 -10  -9  -1    7.83    1.21 
 -10   9   1    6.98    2.13 
  10  -9   1    6.72    2.21 
 -10   9   1    7.96    2.37 
  10  -9   1   12.47    2.48 
 -10  -9  -1    9.97    1.47 
 -10   9   1    7.52    2.40 
  10   9  -1    8.57    1.27 
  10  -9  -1   10.94    2.27 
 -10   9  -1   11.10    2.54 
 -10   9  -1    8.18    2.33 
 -10   9  -1   10.26    2.08 
  10   9   1    9.68    1.55 
 -10   9  -1   14.14    2.74 
 -10   9  -1   13.17    2.43 
 -10  -9   1   12.07    1.36 
  10  -9  -1   15.35    2.43 
 -10  -9   1   13.21    1.39 
  10   9   1   10.34    1.49 
  10   9   1   10.93    1.35 
  10   9   1   10.31    2.18 
 -10  -9   1   11.82    1.26 
 -10   9  -1   11.33    2.36 
  11   9  -1    9.13    2.44 
 -11   9   1    9.56    2.56 
 -11   9   1    7.00    4.06 
  11  -9   1   14.41    2.93 
 -11   9   1    9.69    2.77 
 -11   9   1    9.26    2.58 
 -11   9   1    9.34    2.24 
 -11   9   1    9.87    2.97 
  11   9  -1   10.06    1.38 
  11  -9   1   10.71    2.72 
 -11  -9  -1   12.90    1.75 
 -11  -9  -1    9.07    1.49 
 -11  -9  -1    8.46    1.54 
  11  -9  -1    9.36    2.69 
  11   9   1    7.83    1.79 
 -11  -9   1    8.34    1.32 
 -11   9  -1   13.74    2.97 
 -11  -9   1   11.40    1.44 
  11   9   1   12.12    2.57 
 -11   9  -1    8.86    2.76 
 -11  -9   1   10.05    1.14 
 -11   9  -1   12.43    2.67 
 -11   9  -1   12.88    2.83 
 -11   9  -1    6.52    2.36 
 -11   9  -1   11.79    2.93 
  11  -9  -1   12.78    2.84 
 -12  -9  -1    1.49    1.55 
  12   9  -1    3.35    2.68 
 -12  -9  -1    4.30    1.56 
 -12   9   1    1.02    3.05 
 -12   9   1    0.90    2.60 
  12  -9   1    6.21    3.10 
 -12   9   1   -2.91    2.48 
  12   9   1   -0.59    2.59 
 -12   9  -1    0.99    2.92 
 -12   9  -1   -3.54    2.52 
 -12  -9   1    0.07    1.25 
  12  -9  -1    5.61    3.07 
 -12   9  -1    2.54    2.65 
 -12  -9   1   -2.86    1.76 
   0  10   1  147.07    4.54 
   0  10  -1  143.89    4.75 
   0 -10   1  150.01    4.83 
   0 -10   1  145.84    4.48 
   0  10  -1  148.85    4.47 
   0 -10  -1  143.88    4.53 
   0 -10  -1  145.32    4.62 
   0  10  -1  135.83    4.77 
   0 -10  -1  151.11    4.60 
   0 -10   1  143.62    4.48 
   0  10   1  152.98    4.61 
   0 -10   1  141.88    4.62 
   0 -10   1  145.24    4.51 
   0  10  -1  147.23    4.67 
   0 -10  -1  146.69    4.42 
   0  10  -1  154.25    4.55 
   0 -10  -1  148.73    4.81 
   0  10   1  140.51    4.56 
   0 -10  -1  151.25    4.61 
   0  10   1  144.51    4.48 
   0  10   1  148.23    4.65 
   0  10  -1  143.85    4.45 
   0 -10  -1  148.14    4.59 
   0 -10   1  144.49    4.47 
   0 -10   1  149.71    4.47 
   0  10   1  149.61    4.47 
   1 -10   1   19.87    1.70 
  -1 -10  -1   20.05    1.40 
  -1  10   1   20.64    1.74 
   1 -10   1   20.72    1.67 
  -1 -10  -1   18.98    1.67 
   1  10  -1   21.08    1.61 
  -1  10   1   21.06    1.77 
   1 -10   1   17.86    1.70 
   1 -10   1   19.20    1.74 
  -1 -10  -1   18.09    1.55 
  -1 -10  -1   18.73    1.93 
   1 -10   1   19.20    1.89 
   1  10  -1   20.71    1.90 
  -1 -10  -1   20.57    1.61 
  -1  10   1   12.15    2.17 
  -1 -10  -1   21.10    1.57 
  -1  10   1   20.55    1.81 
  -1  10   1   18.81    1.51 
   1  10  -1   20.61    1.46 
  -1  10   1   17.79    1.79 
   1 -10   1   20.41    1.76 
   1 -10   1   19.54    1.70 
   1 -10  -1   16.83    1.64 
  -1 -10   1   17.58    1.76 
  -1 -10   1   16.30    1.58 
  -1 -10   1   16.64    1.40 
  -1  10  -1   14.80    1.48 
   1 -10  -1   21.52    1.88 
   1 -10  -1   18.57    1.80 
   1  10   1   16.42    1.48 
   1 -10  -1   20.34    1.79 
   1 -10  -1   15.32    1.60 
  -1  10  -1   15.46    1.74 
  -1  10  -1   15.52    1.52 
   1 -10  -1   15.79    1.58 
  -1 -10   1   16.04    1.89 
  -1 -10   1   18.73    1.56 
   1 -10  -1   15.98    1.64 
  -1 -10   1   16.41    1.41 
   1  10   1   15.28    1.48 
   1  10   1   20.10    1.49 
  -1  10  -1   19.06    1.72 
  -1 -10   1   17.24    1.45 
   1  10   1   17.94    1.84 
  -1  10  -1   18.91    1.70 
   1  10   1   15.96    1.51 
   2 -10   1   13.70    1.56 
  -2 -10  -1   13.51    1.83 
   2 -10   1   16.33    1.93 
  -2  10   1   16.77    1.84 
   2  10  -1   14.33    1.28 
  -2 -10  -1   15.21    1.16 
   2 -10   1   14.28    1.59 
   2 -10   1   15.68    1.75 
  -2  10   1   15.14    1.85 
   2  10  -1   16.54    1.41 
   2  10  -1   14.21    1.27 
   2 -10   1   16.54    1.76 
  -2  10   1   16.33    1.76 
  -2  10   1   14.82    1.48 
  -2  10   1   14.34    1.57 
  -2 -10  -1   15.70    1.56 
  -2 -10  -1   14.06    1.47 
  -2 -10  -1   18.16    1.92 
   2 -10   1   14.60    1.66 
  -2 -10  -1   14.60    1.47 
   2  10  -1   13.79    1.33 
   2 -10   1   17.33    1.71 
  -2 -10  -1   13.58    1.45 
   2  10  -1   15.99    1.92 
  -2  10  -1   11.90    1.66 
   2 -10  -1   11.50    1.37 
  -2 -10   1   12.80    1.32 
   2 -10  -1   15.58    1.80 
  -2 -10   1   12.61    1.19 
   2 -10  -1   12.75    1.40 
  -2  10  -1   13.55    1.66 
  -2  10  -1   12.83    1.77 
   2  10   1   14.62    1.40 
  -2 -10   1   12.27    1.45 
  -2  10  -1   11.81    1.58 
  -2 -10   1   12.99    1.82 
   2 -10  -1   13.75    1.76 
  -2  10  -1   11.50    1.59 
   2 -10  -1   13.73    1.69 
   2 -10  -1   17.21    1.63 
  -2 -10   1   14.49    1.42 
   2 -10  -1   14.86    1.53 
   2  10   1   12.88    1.41 
   2  10   1   14.15    1.86 
   2  10   1   13.61    1.43 
  -2  10  -1   14.39    1.76 
  -2 -10   1   11.96    1.30 
  -2 -10   1   11.28    1.35 
   3  10  -1   14.23    1.93 
  -3 -10  -1   16.88    1.97 
   3 -10   1   16.50    1.78 
  -3 -10  -1   15.74    1.47 
  -3 -10  -1   15.90    1.53 
  -3  10   1   13.34    2.10 
   3  10  -1   15.44    1.43 
   3 -10   1   16.78    1.93 
  -3  10   1   16.52    1.81 
   3 -10   1   19.21    1.95 
  -3 -10  -1   15.62    2.01 
  -3  10   1   15.64    2.03 
  -3 -10  -1   15.50    1.48 
   3 -10   1   15.93    1.87 
   3 -10   1   17.43    1.96 
  -3 -10  -1   15.15    0.96 
  -3  10   1   17.91    1.95 
   3 -10   1   15.72    1.57 
   3  10  -1   13.86    1.24 
   3  10  -1   17.32    1.31 
  -3  10   1   16.29    1.79 
  -3 -10  -1   16.87    1.47 
   3  10  -1   15.00    1.33 
  -3  10   1   14.77    1.75 
   3 -10   1   15.30    1.81 
   3  10   1   18.91    1.53 
   3  10   1   18.71    1.46 
   3 -10  -1   20.15    1.60 
   3 -10  -1   18.13    2.01 
  -3 -10   1   19.42    1.40 
  -3 -10   1   22.06    1.50 
  -3 -10   1   19.67    1.23 
   3  10   1   19.67    2.07 
   3  10   1   23.53    1.61 
  -3 -10   1   18.38    1.39 
  -3 -10   1   21.46    1.95 
  -3  10  -1   20.45    1.89 
  -3  10  -1   19.23    1.97 
  -3  10  -1   25.12    2.11 
  -3  10  -1   22.69    1.93 
  -3 -10   1   19.65    2.07 
   3 -10  -1   21.86    1.80 
   3  10   1   19.43    1.48 
   3 -10  -1   23.54    2.06 
  -3  10  -1   21.55    2.14 
   3 -10  -1   18.81    2.02 
  -3  10  -1   17.35    1.82 
   3 -10  -1   19.74    1.99 
   3 -10  -1   22.91    1.97 
  -4 -10  -1   43.44    2.07 
   4  10  -1   38.22    1.73 
   4  10  -1   36.28    2.56 
   4  10  -1   35.03    1.65 
  -4 -10  -1   35.84    1.87 
   4  10  -1   41.73    2.63 
   4 -10   1   43.24    2.66 
   4 -10   1   40.25    2.54 
  -4 -10  -1   37.37    1.99 
  -4 -10  -1   36.45    2.50 
  -4 -10  -1   39.68    2.00 
  -4  10   1   40.21    2.62 
   4 -10   1   39.49    1.99 
   4 -10   1   36.59    2.53 
   4 -10   1   39.65    2.48 
  -4  10   1   36.52    2.40 
   4  10  -1   38.19    1.76 
  -4 -10  -1   36.94    2.62 
   4 -10   1   35.17    2.39 
  -4  10   1   42.43    2.66 
   4 -10   1   39.43    2.51 
  -4  10   1   36.14    2.56 
  -4  10   1   39.48    2.29 
   4 -10  -1   36.31    2.48 
   4  10   1   35.61    2.58 
  -4  10  -1   36.35    2.30 
  -4 -10   1   32.22    1.63 
   4 -10  -1   35.49    1.85 
  -4  10  -1   35.88    2.52 
   4  10   1   33.92    1.77 
  -4 -10   1   37.36    1.80 
   4  10   1   33.56    1.81 
   4 -10  -1   34.69    2.51 
   4 -10  -1   37.32    2.44 
  -4 -10   1   37.26    1.78 
  -4  10  -1   34.02    2.18 
   4 -10  -1   35.56    2.40 
  -4 -10   1   39.79    1.74 
   4 -10  -1   34.55    2.50 
  -4 -10   1   33.89    2.49 
   4 -10  -1   34.14    2.42 
  -4 -10   1   32.12    2.38 
  -4 -10   1   33.47    1.38 
   4  10   1   36.77    1.93 
  -4  10  -1   36.37    2.35 
  -4  10  -1   35.19    2.52 
  -4  10  -1   30.25    2.29 
   4  10   1   34.20    1.89 
  -5 -10  -1   23.08    1.60 
   5  10  -1   22.46    1.35 
   5 -10   1   22.08    2.48 
  -5  10   1   23.60    2.44 
   5 -10   1   23.29    1.66 
   5 -10   1   25.84    2.45 
  -5 -10  -1   26.07    2.35 
   5 -10   1   24.36    2.14 
  -5  10   1   17.05    2.86 
  -5  10   1   27.61    2.32 
   5 -10   1   28.32    2.50 
  -5 -10  -1   24.10    1.69 
  -5  10   1   24.32    2.47 
  -5  10   1   25.35    2.59 
   5 -10   1   18.08    2.26 
  -5 -10  -1   25.94    1.80 
   5  10  -1   21.76    1.45 
   5  10  -1   20.63    1.32 
   5 -10   1   24.90    2.38 
  -5  10   1   20.39    2.08 
   5  10  -1   21.38    1.76 
   5  10  -1   27.02    2.52 
  -5  10  -1   18.25    2.18 
  -5 -10   1   20.34    2.33 
  -5 -10   1   20.86    1.42 
   5 -10  -1   22.43    2.30 
   5 -10  -1   17.92    1.47 
   5 -10  -1   20.76    2.45 
  -5 -10   1   22.94    2.33 
  -5  10  -1   16.96    1.95 
   5  10   1   21.40    1.64 
  -5 -10   1   20.63    1.47 
   5  10   1   17.82    1.44 
  -5  10  -1   22.35    2.45 
   5 -10  -1   17.49    2.28 
  -5  10  -1   22.20    2.52 
   5  10   1   20.73    1.66 
  -5  10  -1   18.05    2.03 
   5 -10  -1   20.57    3.21 
  -5 -10   1   19.49    1.47 
   5  10   1   20.74    1.52 
  -5  10  -1   20.82    2.39 
  -5 -10   1   16.07    1.26 
  -5 -10   1   17.35    0.88 
   5 -10  -1   20.81    2.39 
   5  10   1   15.79    2.29 
   5 -10  -1   16.87    1.95 
  -6 -10  -1   14.52    1.87 
  -6  10   1   12.63    1.80 
  -6  10   1   12.46    1.85 
  -6  10   1   10.09    1.45 
   6  10  -1   13.05    1.15 
   6 -10   1   10.55    1.69 
  -6  10   1   13.88    2.00 
  -6 -10  -1   11.86    1.54 
   6 -10   1   10.78    1.78 
   6 -10   1   13.02    1.90 
   6 -10   1   11.68    1.44 
   6  10  -1   12.63    1.13 
  -6 -10  -1   13.38    1.42 
   6  10  -1   14.52    1.33 
  -6  10   1   11.39    1.80 
   6 -10   1   13.26    1.76 
  -6  10   1   14.57    2.06 
  -6 -10  -1   14.35    1.57 
   6 -10   1   11.72    1.79 
   6  10  -1   13.50    1.84 
   6 -10   1   13.87    1.95 
  -6 -10  -1   12.14    1.57 
   6 -10  -1   11.81    1.71 
  -6 -10   1   12.97    1.86 
  -6  10  -1   11.18    1.97 
  -6  10  -1   11.86    1.63 
   6 -10  -1    8.45    1.77 
   6 -10  -1   12.85    1.91 
  -6 -10   1   13.92    1.28 
  -6  10  -1   13.71    1.88 
  -6 -10   1   11.57    1.71 
   6  10   1   12.53    1.44 
   6 -10  -1   11.64    1.62 
   6 -10  -1   12.15    1.26 
   6 -10  -1   11.72    1.86 
   6  10   1   14.12    1.90 
  -6 -10   1   12.50    1.36 
  -6  10  -1   12.85    1.95 
   6  10   1   11.78    1.54 
  -6 -10   1   11.05    1.16 
   6  10   1   12.74    1.39 
  -6 -10   1   14.54    1.34 
  -6  10  -1   10.74    1.79 
  -6  10  -1   11.59    1.73 
   6 -10  -1   12.72    1.79 
  -7  10   1    3.30    1.46 
  -7  10   1    2.79    1.25 
  -7  10   1    3.17    1.86 
  -7 -10  -1    2.96    1.03 
   7 -10   1    2.37    1.56 
  -7  10   1   -0.73    1.58 
   7  10  -1    3.45    0.71 
  -7  10   1    0.98    1.67 
  -7 -10  -1    4.58    0.94 
   7 -10   1    4.83    1.70 
   7 -10   1    2.58    1.54 
   7  10  -1    3.16    0.85 
   7  10  -1    2.46    0.66 
  -7 -10  -1    4.28    1.02 
   7 -10   1    0.90    1.58 
   7 -10   1    0.57    1.63 
  -7 -10  -1    2.27    1.00 
   7  10  -1    2.31    0.77 
   7 -10   1    4.60    1.59 
  -7  10   1    3.05    1.67 
   7 -10   1    2.81    0.88 
  -7  10  -1    1.39    2.60 
  -7  10  -1    6.50    1.79 
   7  10   1    5.92    1.09 
  -7 -10   1    5.07    0.91 
  -7  10  -1    4.97    1.67 
   7 -10  -1    6.41    1.82 
   7  10   1    5.68    0.99 
   7  10   1    5.45    1.11 
   7  10   1    5.26    2.87 
  -7  10  -1    1.27    1.47 
   7 -10  -1    2.74    1.52 
  -7 -10   1    6.31    0.93 
   7 -10  -1    6.63    1.89 
   7 -10  -1    8.20    1.59 
   7 -10  -1    5.16    1.74 
  -7 -10   1    6.48    0.87 
   7 -10  -1    8.42    1.68 
   7 -10  -1    5.67    0.77 
  -7  10  -1    4.25    1.71 
   7  10   1    5.38    0.96 
  -7 -10   1    6.57    1.62 
  -7  10  -1    4.05    1.43 
  -8  10   1   35.87    3.53 
  -8  10   1   29.95    2.81 
   8 -10   1   33.30    2.93 
   8 -10   1   26.72    3.15 
   8 -10   1   34.51    3.02 
   8  10  -1   32.16    1.77 
  -8 -10  -1   28.25    1.85 
  -8  10   1   32.95    2.75 
   8  10  -1   26.99    1.63 
  -8  10   1   26.28    2.79 
   8  10  -1   31.99    1.50 
  -8  10   1   32.19    3.10 
  -8 -10  -1   28.56    2.06 
   8 -10   1   32.04    3.62 
  -8  10   1   36.24    4.36 
   8  10  -1   32.65    3.20 
   8 -10   1   32.72    3.25 
   8 -10   1   28.94    3.20 
  -8 -10  -1   30.72    2.02 
   8 -10   1   31.61    1.68 
   8 -10  -1   33.01    2.88 
  -8 -10   1   29.66    1.52 
   8 -10  -1   28.03    3.19 
   8  10   1   27.35    2.04 
   8 -10  -1   25.51    3.51 
  -8 -10   1   29.53    1.73 
  -8 -10   1   27.86    3.02 
   8 -10  -1   25.36    3.07 
   8  10   1   27.85    2.03 
   8  10   1   33.39    3.14 
  -8  10  -1   28.19    2.79 
  -8  10  -1   27.02    2.78 
   8 -10  -1   30.18    3.14 
  -8 -10   1   27.27    1.55 
   8  10   1   25.77    1.83 
  -8  10  -1   23.39    2.68 
  -8  10  -1   26.92    2.73 
  -8 -10   1   26.96    1.71 
   8 -10  -1   26.76    3.66 
  -8  10  -1   30.32    3.44 
   8  10   1   26.32    1.89 
  -8  10  -1   30.31    3.19 
   9  10  -1    0.31    0.94 
   9  10  -1    2.08    0.87 
  -9  10   1    2.67    1.94 
  -9 -10  -1    2.40    1.12 
   9 -10   1    3.61    2.13 
   9 -10   1    2.28    1.92 
   9  10  -1    1.94    0.67 
  -9  10   1    1.02    1.50 
  -9 -10  -1    1.35    1.00 
   9  10  -1   -0.39    1.82 
   9 -10   1    0.76    0.74 
  -9  10   1    0.05    1.80 
  -9  10   1    1.60    2.04 
   9  10  -1    1.17    0.64 
  -9 -10  -1    0.94    1.08 
   9 -10   1    2.85    1.68 
   9 -10   1    6.87    2.21 
  -9  10   1    4.27    2.18 
  -9  10  -1    2.48    1.88 
   9 -10  -1   -1.55    1.97 
   9  10   1    0.15    1.93 
   9  10   1    0.16    1.05 
  -9  10  -1    2.90    2.12 
  -9  10  -1    3.73    2.02 
  -9  10  -1    3.12    1.77 
   9 -10  -1    2.91    1.67 
  -9  10  -1    4.71    2.16 
   9  10   1    3.35    1.02 
  -9 -10   1    1.84    0.96 
   9 -10  -1   -1.26    1.87 
  -9 -10   1    3.09    0.92 
  -9  10  -1    3.12    2.15 
  -9 -10   1    1.16    0.97 
  -9 -10   1    3.66    0.80 
   9  10   1    1.73    1.17 
   9  10   1    2.26    1.15 
   9 -10  -1   -1.17    1.90 
 -10 -10  -1    3.97    1.30 
 -10  10   1    3.48    2.11 
  10  10  -1    4.65    2.19 
 -10 -10  -1    2.90    1.16 
  10 -10   1    6.28    2.50 
 -10 -10  -1    3.98    1.41 
  10  10  -1    3.94    1.10 
  10 -10   1    3.57    2.35 
 -10  10   1    2.90    1.81 
 -10  10   1    6.03    2.18 
 -10  10   1    4.52    2.53 
 -10  10   1    5.42    2.32 
  10  10  -1    4.04    1.04 
  10 -10   1    2.02    1.96 
 -10  10  -1    2.19    2.28 
 -10 -10   1    4.94    1.10 
 -10  10  -1    5.16    2.50 
 -10  10  -1    3.71    2.09 
 -10 -10   1    4.11    1.14 
 -10  10  -1    2.99    2.28 
 -10 -10   1    3.16    0.84 
  10  10   1    3.42    2.22 
 -10  10  -1    5.61    2.71 
 -10 -10   1    4.76    0.84 
  10 -10  -1    1.49    2.45 
 -10  10  -1    1.90    2.42 
  10  10   1    3.40    1.43 
  10 -10  -1    6.68    2.41 
  10 -10  -1    4.87    1.89 
 -11  10   1   17.17    2.84 
  11 -10   1   15.42    3.00 
 -11  10   1   16.13    3.03 
 -11  10   1   13.59    3.28 
  11 -10   1   23.37    2.93 
 -11 -10  -1   19.96    2.43 
  11  10  -1   18.43    3.04 
  11  10  -1   18.32    1.85 
 -11  10   1   22.77    3.37 
 -11 -10  -1   23.63    2.76 
 -11  10   1   17.51    2.67 
  11 -10   1   24.57    3.37 
 -11 -10   1   16.63    2.11 
 -11  10  -1   15.62    2.86 
  11  10   1   10.71    2.78 
  11 -10  -1   13.90    2.86 
  11 -10  -1   18.82    2.57 
 -11  10  -1   17.92    3.00 
  11 -10  -1   15.64    2.92 
 -11 -10   1   15.93    1.93 
 -11  10  -1   11.36    2.99 
  11  10   1   16.21    1.97 
 -12  10   1    5.42    2.82 
 -12  10   1    1.29    3.28 
 -12 -10  -1    3.56    1.58 
  12  10  -1    5.16    2.95 
  12 -10   1    7.48    3.20 
 -12 -10   1    3.96    1.30 
  12  10   1    0.45    2.85 
 -12  10  -1   -0.95    3.08 
 -12  10  -1    8.34    3.10 
  12 -10  -1    4.18    3.23 
   0  11  -1   35.47    2.09 
   0 -11  -1   28.47    2.12 
   0  11   1   33.96    1.97 
   0  11   1   32.30    2.12 
   0  11  -1   32.28    2.28 
   0 -11  -1   31.74    2.05 
   0 -11   1   28.83    2.19 
   0 -11   1   30.43    1.92 
   0 -11  -1   31.74    2.07 
   0 -11  -1   31.04    1.93 
   0 -11   1   31.50    1.95 
   0 -11  -1   32.23    2.13 
   0  11  -1   28.91    1.95 
   0 -11  -1   37.83    2.41 
   0  11  -1   30.93    1.98 
   0  11   1   33.03    2.28 
   0 -11   1   32.45    2.09 
   0 -11   1   37.13    2.45 
   0 -11   1   32.57    2.01 
   0  11   1   35.27    2.18 
   0 -11   1   31.04    1.99 
   0 -11  -1   32.14    2.11 
   0  11   1   31.78    1.99 
  -1 -11  -1   16.01    1.62 
  -1 -11  -1   16.99    1.69 
  -1 -11  -1   17.25    1.67 
  -1  11   1   15.82    1.77 
   1 -11   1   15.72    1.69 
  -1  11   1   13.57    1.83 
   1  11  -1   15.41    1.53 
   1 -11   1   17.79    1.80 
  -1  11   1   16.18    1.73 
  -1 -11  -1   15.24    1.64 
   1  11  -1   14.21    1.48 
   1 -11   1   16.28    2.17 
   1 -11   1   14.68    1.78 
   1  11  -1   16.24    1.57 
   1  11  -1   16.46    1.99 
  -1  11   1   14.00    1.62 
   1 -11   1   18.79    2.09 
  -1 -11  -1   14.69    1.72 
   1 -11   1   17.05    1.79 
  -1  11   1   17.08    1.84 
  -1 -11  -1   15.02    1.44 
   1 -11   1   16.20    1.72 
  -1 -11  -1   15.56    1.95 
  -1  11  -1   20.65    1.76 
   1  11   1   20.44    1.76 
   1  11   1   20.87    1.66 
   1  11   1   22.74    1.80 
   1  11   1   20.29    2.06 
  -1 -11   1   18.42    1.60 
  -1 -11   1   21.20    2.02 
  -1  11  -1   19.73    1.74 
  -1 -11   1   21.47    1.63 
   1 -11  -1   23.50    2.04 
  -1 -11   1   21.19    1.62 
   1 -11  -1   22.40    1.89 
   1  11   1   19.39    1.70 
   1 -11  -1   21.70    1.97 
   1 -11  -1   21.86    2.15 
  -1  11  -1   18.83    1.73 
  -1 -11   1   21.44    1.77 
  -1 -11   1   20.90    1.68 
  -1  11  -1   17.80    1.91 
   1 -11  -1   21.54    1.91 
  -1  11  -1   19.79    1.93 
  -1 -11   1   23.09    2.21 
   1 -11  -1   20.63    1.92 
   1 -11  -1   20.79    1.87 
   2  11  -1    4.96    1.42 
   2  11  -1    4.89    0.90 
  -2 -11  -1    5.43    1.12 
   2 -11   1    4.37    1.32 
   2  11  -1    4.27    0.85 
   2  11  -1    5.31    0.99 
  -2  11   1    6.42    1.36 
  -2 -11  -1    5.58    0.99 
  -2 -11  -1    4.95    1.28 
  -2  11   1    4.71    1.08 
  -2  11   1    5.26    1.24 
   2 -11   1    4.58    1.28 
   2 -11   1    6.35    1.27 
   2 -11   1    5.08    1.24 
   2  11  -1    3.92    0.94 
  -2 -11  -1    4.56    0.98 
  -2  11   1    3.14    1.02 
  -2 -11  -1    4.91    1.09 
   2 -11   1    6.24    1.20 
   2 -11   1    6.74    1.32 
  -2 -11  -1    5.54    0.78 
   2 -11   1    6.07    1.13 
  -2  11   1    5.39    1.29 
  -2  11   1    4.18    1.13 
  -2 -11  -1    6.15    1.31 
  -2  11   1    4.65    1.16 
   2  11   1    4.48    1.00 
  -2  11  -1    3.44    1.05 
  -2 -11   1    3.98    0.82 
   2 -11  -1    3.86    1.24 
   2 -11  -1    3.94    1.09 
  -2 -11   1    4.46    0.91 
   2  11   1    4.12    1.03 
   2  11   1    3.20    1.19 
  -2  11  -1    4.97    1.12 
   2  11   1    5.03    0.98 
   2 -11  -1    4.14    1.14 
  -2 -11   1    4.85    1.03 
  -2 -11   1    3.77    0.92 
  -2  11  -1    4.38    1.33 
   2 -11  -1    3.97    1.33 
  -2 -11   1    3.59    1.19 
   2 -11  -1    3.47    1.18 
  -2 -11   1    4.49    1.22 
  -2  11  -1    6.61    1.31 
  -2 -11   1    3.89    0.93 
   2 -11  -1    5.36    1.30 
  -2  11  -1    6.45    1.18 
   2 -11  -1    2.93    1.29 
   3  11  -1    6.72    1.02 
   3 -11   1    6.84    1.17 
   3  11  -1    6.42    0.91 
  -3 -11  -1    8.54    1.19 
   3 -11   1    6.03    1.22 
  -3  11   1    7.39    1.39 
  -3 -11  -1    7.70    0.95 
   3 -11   1    9.24    1.56 
  -3 -11  -1    7.61    1.11 
   3 -11   1    6.60    1.46 
   3 -11   1    7.94    1.38 
   3  11  -1    8.22    1.07 
  -3  11   1    7.27    1.40 
  -3 -11  -1    7.60    1.17 
  -3  11   1    7.71    1.46 
  -3 -11  -1    8.22    1.12 
   3 -11   1    8.62    1.43 
   3  11  -1    9.23    1.03 
  -3 -11  -1    9.27    1.65 
   3 -11   1    8.59    1.50 
  -3  11   1    7.09    1.28 
  -3  11   1    7.58    1.32 
  -3 -11  -1   10.27    1.57 
  -3  11   1    5.78    1.38 
   3  11  -1   10.00    1.60 
   3 -11  -1    8.14    1.36 
  -3  11  -1   11.69    1.64 
  -3 -11   1    9.54    1.57 
   3 -11  -1   10.59    1.62 
  -3 -11   1    9.62    1.15 
  -3 -11   1   10.29    1.44 
  -3 -11   1   11.53    1.64 
   3 -11  -1    9.94    1.49 
   3  11   1   10.35    1.40 
  -3  11  -1    8.61    1.50 
  -3 -11   1   10.53    1.12 
   3 -11  -1    9.76    1.50 
  -3  11  -1    9.88    1.45 
   3 -11  -1   11.03    1.61 
  -3  11  -1    8.19    1.39 
  -3 -11   1    8.69    1.33 
   3  11   1   10.41    1.67 
  -3 -11   1   10.01    1.32 
   3  11   1    7.80    1.02 
   3  11   1    9.05    1.19 
  -3  11  -1    8.21    1.39 
  -3  11  -1   10.76    1.45 
   3 -11  -1    8.29    1.40 
   3 -11  -1    8.73    1.20 
   3  11   1    9.76    1.12 
  -4  11   1   15.85    2.10 
  -4  11   1   17.39    2.15 
  -4  11   1   20.59    2.48 
   4 -11   1   18.70    2.19 
   4  11  -1   20.34    2.36 
  -4  11   1   23.90    2.20 
   4 -11   1   18.52    2.31 
  -4  11   1   21.65    2.04 
   4  11  -1   20.43    1.41 
  -4 -11  -1   21.68    2.38 
  -4 -11  -1   21.74    1.77 
   4 -11   1   20.24    2.39 
  -4 -11  -1   14.92    1.54 
  -4 -11  -1   15.66    2.28 
   4  11  -1   15.53    1.65 
   4 -11   1   18.66    2.25 
   4 -11   1   19.22    1.76 
   4  11  -1   18.71    1.53 
   4 -11   1   19.49    2.29 
   4 -11   1   20.46    2.36 
  -4 -11  -1   19.20    1.73 
  -4 -11  -1   17.41    1.69 
   4  11  -1   17.22    1.44 
  -4  11   1   19.99    2.37 
  -4  11  -1   19.90    2.01 
  -4 -11   1   22.58    2.31 
   4  11   1   19.97    1.60 
  -4 -11   1   22.00    1.67 
   4 -11  -1   25.29    2.22 
   4 -11  -1   20.31    2.07 
  -4 -11   1   21.32    1.51 
  -4 -11   1   22.13    2.39 
  -4 -11   1   25.48    1.62 
   4  11   1   21.69    1.74 
  -4  11  -1   24.49    2.19 
  -4 -11   1   26.50    1.72 
   4  11   1   22.56    1.70 
  -4  11  -1   26.27    2.56 
  -4 -11   1   22.41    1.23 
   4 -11  -1   22.34    1.75 
  -4  11  -1   25.96    2.47 
   4 -11  -1   23.41    2.40 
  -4  11  -1   22.50    2.18 
  -4  11  -1   20.84    2.23 
   4 -11  -1   27.58    2.41 
   4  11   1   24.09    2.47 
   4 -11  -1   20.03    2.30 
   4 -11  -1   21.31    2.31 
   4  11   1   23.88    1.77 
   5 -11   1   17.76    2.41 
   5  11  -1   18.92    1.54 
  -5 -11  -1   20.20    1.66 
   5 -11   1   21.36    2.47 
  -5  11   1   18.14    2.39 
  -5 -11  -1   20.42    1.67 
   5  11  -1   17.59    1.34 
   5  11  -1   16.29    1.45 
  -5 -11  -1   20.63    1.82 
   5  11  -1   20.14    2.57 
  -5  11   1   16.94    2.04 
  -5  11   1   19.63    2.58 
  -5 -11  -1   24.92    2.68 
   5 -11   1   18.70    2.61 
  -5 -11  -1   19.88    2.45 
  -5  11   1   19.07    2.19 
   5  11  -1   20.31    1.43 
   5 -11   1   18.62    2.37 
  -5  11   1   24.49    2.75 
  -5  11   1   21.59    2.38 
  -5 -11  -1   17.68    1.76 
   5 -11   1   23.21    2.33 
   5 -11   1   19.67    1.72 
   5 -11   1   20.97    2.40 
  -5  11  -1   22.29    2.35 
   5 -11  -1   21.21    1.66 
  -5 -11   1   25.81    1.69 
   5 -11  -1   21.65    2.51 
  -5  11  -1   19.28    2.29 
  -5  11  -1   17.75    2.37 
  -5 -11   1   20.27    1.56 
   5  11   1   19.04    1.62 
  -5 -11   1   23.45    2.54 
   5  11   1   23.82    1.75 
  -5  11  -1   23.84    2.62 
  -5 -11   1   24.01    1.69 
   5 -11  -1   21.77    2.59 
   5  11   1   20.75    2.51 
   5  11   1   20.86    1.75 
   5 -11  -1   22.62    2.63 
  -5  11  -1   20.29    2.42 
   5 -11  -1   22.43    2.50 
  -5 -11   1   20.63    2.47 
  -5 -11   1   19.72    0.94 
   5  11   1   23.51    1.84 
  -5 -11   1   22.80    1.49 
  -5  11  -1   24.56    2.67 
   5 -11  -1   20.14    2.42 
   5 -11  -1   24.31    2.50 
   6  11  -1   44.90    2.06 
  -6 -11  -1   47.94    2.32 
   6  11  -1   43.06    1.87 
   6 -11   1   45.34    2.88 
   6 -11   1   49.20    3.24 
   6 -11   1   42.67    3.32 
   6 -11   1   44.55    2.20 
  -6 -11  -1   42.66    2.13 
  -6 -11  -1   44.68    3.14 
  -6  11   1   41.69    3.01 
   6 -11   1   50.17    3.17 
  -6  11   1   40.99    3.19 
  -6  11   1   48.87    3.56 
  -6  11   1   46.14    3.25 
   6 -11   1   41.28    3.11 
  -6 -11  -1   48.50    2.25 
  -6  11   1   47.02    3.09 
   6 -11   1   44.83    3.18 
  -6  11   1   45.38    2.86 
   6  11  -1   41.51    1.81 
  -6  11  -1   41.57    2.84 
  -6  11  -1   43.67    3.47 
  -6  11  -1   43.62    3.01 
  -6 -11   1   48.39    3.31 
  -6 -11   1   44.05    3.11 
  -6 -11   1   42.59    1.89 
   6  11   1   45.13    2.33 
   6 -11  -1   40.15    2.01 
   6 -11  -1   42.88    3.38 
  -6  11  -1   44.05    2.88 
   6  11   1   41.23    3.76 
   6  11   1   43.65    2.29 
   6 -11  -1   48.87    3.02 
  -6 -11   1   46.72    2.10 
   6  11   1   43.51    2.17 
  -6 -11   1   45.35    2.07 
  -6  11  -1   45.65    3.10 
   6  11   1   41.85    2.11 
   6 -11  -1   41.97    3.05 
  -6  11  -1   43.67    3.28 
   6 -11  -1   46.99    3.20 
  -6 -11   1   45.46    2.00 
   6 -11  -1   48.78    3.06 
   6 -11  -1   43.31    3.17 
  -7  11   1   40.76    3.10 
  -7 -11  -1   40.94    2.15 
   7 -11   1   35.59    3.63 
  -7  11   1   45.68    3.58 
   7  11  -1   50.06    3.43 
  -7  11   1   40.27    3.27 
   7 -11   1   47.74    3.27 
   7 -11   1   42.64    2.11 
  -7 -11  -1   44.44    2.30 
  -7  11   1   46.11    3.38 
  -7  11   1   41.62    2.89 
   7  11  -1   42.47    1.78 
  -7  11   1   49.40    3.35 
   7 -11   1   48.66    3.13 
   7 -11   1   44.68    3.47 
   7 -11   1   47.42    3.46 
  -7 -11  -1   45.38    2.29 
   7  11  -1   44.24    2.08 
  -7 -11  -1   49.37    2.41 
   7 -11   1   42.26    3.37 
   7  11  -1   45.48    1.81 
   7  11  -1   41.28    1.95 
  -7  11  -1   47.22    3.35 
  -7 -11   1   45.12    3.34 
  -7  11  -1   50.73    3.50 
   7  11   1   40.76    2.39 
  -7 -11   1   46.42    3.34 
  -7  11  -1   51.30    3.62 
   7 -11  -1   42.87    3.73 
   7 -11  -1   41.21    3.11 
   7 -11  -1   47.81    3.29 
   7  11   1   41.09    2.52 
   7 -11  -1   44.91    3.07 
   7 -11  -1   41.84    1.89 
   7  11   1   43.49    3.41 
  -7  11  -1   38.95    3.04 
   7 -11  -1   45.82    3.51 
  -7 -11   1   45.39    2.09 
  -7 -11   1   46.52    1.96 
   7  11   1   45.62    2.20 
  -7  11  -1   42.98    3.43 
   7  11   1   42.68    2.13 
  -7 -11   1   46.62    2.11 
  -7  11  -1   48.38    3.36 
   7 -11  -1   40.45    5.25 
  -8  11   1   20.09    2.58 
   8 -11   1   20.32    2.62 
  -8 -11  -1   22.34    1.94 
   8 -11   1   18.71    1.63 
  -8 -11  -1   19.67    1.95 
   8 -11   1   23.21    2.67 
  -8 -11  -1   21.57    1.96 
  -8  11   1   25.18    3.51 
  -8  11   1   19.87    2.51 
  -8 -11  -1   17.84    1.70 
   8  11  -1   19.04    1.30 
   8  11  -1   19.90    1.65 
   8 -11   1   18.28    2.55 
   8  11  -1   16.32    1.50 
   8  11  -1   22.53    3.23 
  -8  11   1   21.29    2.62 
  -8  11   1   19.41    2.62 
   8 -11   1   18.32    2.38 
   8  11  -1   16.24    1.24 
   8 -11   1   20.52    2.38 
   8  11   1   18.53    2.44 
  -8  11  -1   20.68    2.72 
  -8  11  -1   20.14    3.02 
   8  11   1   18.95    2.02 
  -8 -11   1   17.34    1.69 
   8  11   1   16.52    1.92 
  -8 -11   1   19.61    1.67 
  -8 -11   1   20.57    2.48 
  -8  11  -1   18.87    2.30 
   8 -11  -1   23.27    2.65 
   8  11   1   19.95    1.81 
   8 -11  -1   21.08    2.62 
  -8 -11   1   19.72    1.47 
  -8  11  -1   17.17    2.11 
   8 -11  -1   15.53    2.37 
  -8  11  -1   15.24    2.26 
   8  11   1   16.30    1.69 
   8 -11  -1   15.88    2.51 
  -8 -11   1   17.99    2.35 
  -8 -11   1   20.30    1.40 
  -8  11  -1   18.16    2.66 
   8 -11  -1   17.38    2.15 
   9  11  -1    4.29    0.96 
  -9  11   1    4.94    2.18 
  -9  11   1    5.50    2.31 
   9 -11   1    6.01    2.29 
   9 -11   1    3.45    1.94 
  -9 -11  -1    2.71    1.10 
  -9  11   1    0.99    2.07 
  -9 -11  -1    4.08    1.22 
   9 -11   1    4.89    0.92 
   9 -11   1    5.83    2.27 
   9  11  -1    8.34    2.23 
  -9  11   1    6.28    1.84 
   9 -11   1    5.62    2.35 
  -9 -11  -1    3.70    1.20 
   9  11  -1    3.49    1.04 
  -9  11   1    6.66    2.45 
  -9 -11   1    3.89    1.06 
   9  11   1    2.79    1.07 
  -9  11  -1    2.23    1.99 
   9 -11  -1    5.50    2.43 
   9 -11  -1    5.24    2.09 
  -9  11  -1    7.02    2.55 
   9 -11  -1    1.96    1.82 
  -9  11  -1    2.49    2.09 
   9  11   1    6.78    1.47 
  -9  11  -1    1.80    2.27 
  -9  11  -1    6.09    1.92 
  -9 -11   1    2.25    0.82 
   9  11   1    6.30    2.27 
  -9 -11   1    3.57    0.81 
   9 -11  -1    1.55    2.12 
   9  11   1    3.82    1.34 
  -9  11  -1    0.41    2.31 
 -10  11   1   17.05    2.43 
 -10  11   1   17.69    2.76 
 -10 -11  -1   16.91    1.73 
  10 -11   1   12.99    2.86 
  10  11  -1   17.49    2.72 
  10  11  -1   14.31    1.35 
  10 -11   1   19.35    2.92 
 -10 -11  -1   15.72    1.57 
 -10  11   1   12.23    2.70 
 -10  11   1   13.85    2.98 
 -10  11   1   17.83    3.05 
  10 -11   1   16.51    2.52 
 -10 -11  -1   16.28    1.79 
 -10  11  -1   18.30    3.12 
  10  11   1   18.21    2.46 
 -10  11  -1   16.47    2.98 
  10 -11  -1   23.65    2.94 
  10 -11  -1   20.96    3.08 
  10  11   1   19.85    2.96 
 -10  11  -1   16.86    2.69 
 -10  11  -1   15.29    2.98 
 -10 -11   1   21.00    1.92 
  10 -11  -1   21.15    2.56 
  10  11   1   18.61    1.97 
 -10  11  -1   20.03    3.17 
 -10 -11   1   17.47    1.19 
 -11  11   1    1.50    3.05 
  11  11  -1    1.20    2.70 
  11 -11   1   10.80    2.83 
  11 -11   1    1.86    2.78 
 -11  11   1    4.80    2.73 
 -11 -11  -1    4.49    1.47 
  11 -11   1    6.11    2.50 
 -11 -11  -1    5.88    1.43 
 -11  11   1   -2.63    2.47 
 -11 -11   1    4.64    1.28 
 -11  11  -1    3.49    3.06 
  11 -11  -1    6.52    2.89 
  11 -11  -1    4.55    2.41 
 -11  11  -1    6.54    2.78 
  11  11   1    2.36    2.69 
  11 -11  -1    4.36    3.08 
 -11  11  -1    4.88    2.90 
  11  11   1    7.56    2.09 
   0 -12  -1  176.00    5.37 
   0 -12   1  179.30    5.47 
   0 -12  -1  181.13    5.59 
   0 -12  -1  178.16    5.57 
   0 -12  -1  181.25    5.68 
   0 -12   1  179.18    5.47 
   0  12   1  181.98    5.59 
   0 -12   1  179.24    5.50 
   0  12   1  172.40    5.47 
   0 -12   1  179.69    5.67 
   0  12  -1  184.08    5.56 
   0 -12  -1  179.83    5.88 
   0 -12   1  182.65    5.47 
   0 -12   1  179.28    5.89 
   0 -12  -1  185.12    5.58 
   0  12  -1  157.52    5.57 
   0 -12  -1  177.10    5.59 
   0 -12   1  180.26    5.48 
   0  12  -1  175.09    5.39 
   0  12   1  178.09    5.61 
   0  12  -1  171.27    5.64 
   0  12   1  174.35    5.63 
   1  12  -1    2.16    0.91 
  -1 -12  -1   -0.24    1.01 
   1 -12   1    0.07    1.09 
   1  12  -1    1.12    1.08 
  -1  12   1    1.45    1.28 
   1 -12   1    1.96    1.17 
  -1  12   1    1.46    1.06 
  -1  12   1    1.60    1.13 
  -1 -12  -1    0.24    1.14 
  -1 -12  -1    2.11    1.08 
  -1 -12  -1    3.09    1.14 
   1 -12   1    1.70    1.32 
   1 -12   1    1.77    1.14 
  -1 -12  -1    4.44    1.38 
   1 -12   1    1.06    1.04 
  -1  12   1    3.34    1.24 
   1  12  -1    1.70    1.34 
  -1 -12  -1    1.83    0.84 
  -1 -12  -1    0.69    0.98 
   1 -12   1    1.87    1.08 
   1 -12   1    3.73    1.36 
   1  12  -1    2.89    1.07 
  -1  12   1    3.35    1.16 
   1  12   1    1.49    0.97 
   1  12   1    1.58    1.00 
  -1  12  -1    0.70    0.95 
  -1  12  -1    2.52    1.24 
  -1 -12   1    1.70    1.20 
  -1 -12   1    2.31    0.94 
  -1 -12   1    1.21    0.95 
   1 -12  -1    3.19    1.23 
   1  12   1    1.92    0.98 
   1 -12  -1    2.23    1.17 
  -1 -12   1    1.30    1.26 
   1  12   1    0.63    1.22 
   1 -12  -1    1.16    1.21 
  -1 -12   1    2.08    0.91 
  -1  12  -1    1.25    1.09 
  -1  12  -1    3.09    1.00 
   1 -12  -1    2.69    1.26 
  -1 -12   1    2.55    1.06 
   1  12   1    2.46    1.09 
  -1  12  -1    2.26    1.18 
   1 -12  -1    1.09    1.16 
  -1 -12   1    1.91    1.05 
   1 -12  -1    1.79    1.10 
   1 -12  -1    1.42    1.05 
  -2 -12  -1   19.65    1.93 
  -2 -12  -1   18.84    1.45 
  -2  12   1   21.30    2.06 
  -2 -12  -1   20.82    1.90 
   2 -12   1   20.57    2.35 
  -2  12   1   19.67    2.03 
   2 -12   1   21.56    2.22 
   2  12  -1   19.32    1.67 
   2  12  -1   20.61    1.65 
   2  12  -1   20.60    2.36 
   2 -12   1   18.20    2.11 
  -2 -12  -1   20.24    1.81 
   2 -12   1   19.54    2.10 
  -2 -12  -1   17.06    2.22 
  -2  12   1   22.77    2.21 
  -2  12   1   21.56    2.28 
  -2 -12  -1   20.18    2.41 
   2  12  -1   18.85    1.66 
   2 -12   1   18.50    2.11 
  -2  12   1   22.88    2.03 
   2 -12   1   21.70    2.24 
  -2  12   1   17.64    2.26 
  -2  12   1   17.86    2.00 
  -2 -12  -1   19.55    1.84 
   2  12  -1   18.70    1.82 
   2 -12   1   20.62    2.02 
   2  12   1   11.46    1.54 
  -2  12  -1   15.77    1.89 
   2 -12  -1   15.37    2.10 
  -2 -12   1   17.36    2.28 
   2 -12  -1   14.88    2.00 
   2 -12  -1   17.69    2.16 
   2  12   1   15.93    2.25 
   2  12   1   17.75    1.85 
  -2  12  -1   17.33    1.94 
  -2 -12   1   15.23    1.50 
   2 -12  -1   18.31    2.14 
  -2 -12   1   14.13    1.61 
  -2 -12   1   15.64    2.19 
  -2 -12   1   19.39    1.80 
  -2  12  -1   18.19    2.11 
   2 -12  -1   19.98    1.97 
   2 -12  -1   17.76    2.08 
   2  12   1   18.54    1.86 
   2  12   1   18.41    1.71 
  -2 -12   1   14.86    1.65 
  -2 -12   1   19.70    1.72 
  -2  12  -1   18.92    2.18 
  -2  12  -1   14.71    2.05 
   2 -12  -1   21.81    2.35 
  -3 -12  -1   19.12    2.29 
   3  12  -1   16.58    1.64 
  -3 -12  -1   15.43    1.64 
  -3  12   1   13.03    1.73 
  -3 -12  -1   18.73    2.45 
   3 -12   1   15.99    1.94 
  -3 -12  -1   14.16    1.75 
  -3  12   1   16.46    2.32 
  -3  12   1   12.85    1.74 
   3  12  -1   12.95    1.88 
   3  12  -1   13.73    1.60 
   3  12  -1   13.29    1.54 
  -3 -12  -1   17.36    1.85 
   3 -12   1   12.94    1.65 
   3 -12   1   12.24    1.66 
   3 -12   1   13.69    1.79 
   3 -12   1   14.75    1.62 
   3 -12   1   14.37    1.78 
  -3  12   1   14.39    1.73 
   3  12  -1   16.03    1.50 
  -3 -12  -1   13.82    1.65 
  -3 -12  -1   11.98    1.17 
   3 -12   1   16.33    2.00 
  -3  12   1   13.41    1.61 
  -3  12   1   14.61    1.73 
   3 -12  -1   18.87    2.40 
   3 -12  -1   13.78    1.71 
  -3  12  -1   13.49    1.69 
  -3 -12   1   13.88    1.61 
  -3 -12   1   18.08    1.73 
   3 -12  -1   19.84    2.23 
  -3  12  -1   16.42    2.17 
   3 -12  -1   19.43    2.35 
   3  12   1   16.81    1.77 
   3  12   1   17.21    2.02 
   3 -12  -1   16.93    1.93 
   3  12   1   16.66    1.66 
  -3 -12   1   13.97    1.90 
  -3 -12   1   16.81    2.29 
   3 -12  -1   12.27    1.78 
  -3  12  -1   15.91    2.05 
  -3 -12   1   14.07    1.72 
  -3 -12   1   14.40    1.35 
  -3 -12   1   17.41    1.73 
  -3  12  -1   15.74    2.07 
   3  12   1   15.66    1.84 
   3  12   1   15.26    1.67 
   3 -12  -1   14.39    1.75 
  -3  12  -1   15.82    1.85 
  -4 -12  -1   13.64    1.93 
  -4  12   1   12.49    1.88 
   4  12  -1   13.78    1.97 
   4 -12   1   12.79    1.79 
   4  12  -1   14.39    1.59 
   4  12  -1   11.94    1.46 
   4 -12   1   13.00    1.83 
   4 -12   1    9.60    1.69 
  -4  12   1   14.88    1.89 
  -4 -12  -1   11.05    1.58 
  -4 -12  -1   11.71    1.39 
   4  12  -1   13.35    1.76 
   4 -12   1   14.17    1.93 
  -4  12   1   10.43    1.58 
   4 -12   1   12.67    1.68 
  -4  12   1   14.39    1.99 
  -4 -12  -1   12.67    1.41 
   4 -12   1   10.08    1.63 
  -4 -12  -1   10.27    1.72 
   4  12  -1   12.17    1.38 
  -4 -12  -1   12.06    1.37 
   4 -12   1   14.62    1.89 
  -4  12   1   11.76    1.74 
  -4  12   1   15.09    2.09 
  -4 -12   1   21.64    1.71 
  -4 -12   1   18.26    1.74 
  -4  12  -1   17.63    1.98 
  -4 -12   1   15.25    1.90 
  -4  12  -1   18.54    2.27 
  -4  12  -1   16.88    2.28 
  -4 -12   1   14.84    1.56 
  -4 -12   1   19.18    1.71 
  -4  12  -1   20.07    2.58 
   4  12   1   21.50    2.54 
   4 -12  -1   19.47    2.24 
   4 -12  -1   18.58    2.22 
   4  12   1   17.47    1.76 
  -4  12  -1   17.89    2.22 
  -4 -12   1   17.93    1.25 
   4 -12  -1   14.88    1.80 
   4 -12  -1   18.98    2.53 
   4  12   1   20.59    1.68 
   4 -12  -1   18.67    2.46 
   4  12   1   16.37    1.82 
   4 -12  -1   18.62    1.85 
  -4  12  -1   18.46    2.59 
   4 -12  -1   18.77    2.41 
  -4 -12   1   18.83    2.58 
   4  12   1   19.34    1.84 
   5  12  -1   13.62    1.61 
   5 -12   1    8.04    2.63 
   5  12  -1   13.99    1.49 
  -5 -12  -1   12.84    1.70 
   5  12  -1   10.71    1.34 
   5 -12   1   12.63    1.97 
   5 -12   1   10.69    1.86 
   5 -12   1   12.02    1.42 
  -5 -12  -1   15.30    1.76 
  -5 -12  -1   11.63    1.91 
   5  12  -1   14.91    1.51 
  -5  12   1   13.76    1.94 
  -5  12   1   13.68    3.04 
  -5  12   1   12.55    1.76 
  -5  12   1   12.65    1.86 
   5 -12   1   12.99    1.87 
  -5  12   1   14.40    2.05 
   5 -12   1   14.85    1.94 
  -5  12   1   13.33    1.96 
  -5 -12  -1   10.74    1.33 
   5  12  -1   16.05    2.15 
  -5 -12  -1   14.92    1.89 
  -5 -12  -1   11.76    1.97 
  -5  12  -1   13.18    2.00 
  -5 -12   1   11.77    1.44 
   5 -12  -1    9.72    2.02 
  -5 -12   1   12.86    2.00 
  -5  12  -1    9.79    1.61 
  -5  12  -1   13.84    2.03 
   5  12   1   11.57    1.31 
   5  12   1    9.32    1.18 
  -5 -12   1   12.37    1.30 
   5 -12  -1   12.17    1.95 
   5 -12  -1   10.11    1.89 
   5 -12  -1   11.61    1.68 
   5  12   1   11.36    1.41 
   5 -12  -1   13.91    1.88 
   5 -12  -1    9.44    1.71 
   5  12   1   14.34    1.77 
  -5 -12   1   11.14    1.52 
  -5 -12   1   10.47    1.13 
  -5  12  -1   12.82    1.89 
  -5  12  -1    9.20    1.70 
   5 -12  -1   11.26    1.83 
   5  12   1    9.08    1.82 
  -6 -12  -1    2.55    1.00 
  -6  12   1    3.03    1.84 
   6 -12   1    3.13    1.82 
  -6 -12  -1    1.92    1.77 
  -6  12   1    0.94    1.58 
   6  12  -1    2.25    1.66 
   6 -12   1    0.30    1.02 
  -6  12   1    2.73    1.40 
  -6 -12  -1    1.52    1.63 
   6 -12   1    2.52    1.71 
  -6  12   1    1.03    1.65 
   6 -12   1    1.34    1.68 
   6 -12   1    4.77    1.83 
   6 -12   1    2.01    1.78 
  -6  12   1    1.51    1.64 
   6 -12   1    3.97    1.97 
   6  12  -1    3.96    0.97 
   6  12  -1    3.45    0.85 
  -6 -12  -1    2.26    1.10 
  -6 -12  -1    4.22    1.07 
   6  12  -1    2.41    0.77 
  -6 -12  -1    1.92    1.10 
  -6  12   1    2.78    1.85 
  -6 -12   1    3.20    1.67 
  -6 -12   1    3.66    1.00 
  -6  12  -1    3.81    1.71 
  -6  12  -1    1.87    1.86 
  -6 -12   1    3.23    0.96 
  -6  12  -1    3.45    1.87 
  -6 -12   1    1.39    1.69 
   6 -12  -1   -0.43    1.54 
   6  12   1    3.64    1.00 
  -6  12  -1    3.71    1.82 
  -6 -12   1    3.51    0.95 
  -6 -12   1    2.46    0.83 
   6 -12  -1    3.11    1.87 
   6  12   1    3.37    1.11 
  -6  12  -1    5.10    1.53 
   6 -12  -1    4.23    1.80 
   6  12   1    3.78    0.96 
   6 -12  -1    3.37    1.81 
   6  12   1    4.29    1.79 
   6  12   1    2.24    1.14 
   6 -12  -1    3.33    1.61 
   6 -12  -1    0.42    1.61 
   6 -12  -1    2.57    0.97 
  -7  12   1    2.88    1.54 
   7 -12   1    2.10    1.64 
   7 -12   1    2.33    1.80 
  -7  12   1   -1.31    1.76 
  -7 -12  -1    0.96    0.94 
   7 -12   1   -0.56    1.82 
  -7 -12  -1    0.24    1.07 
  -7 -12  -1    2.19    1.10 
   7 -12   1    0.53    1.01 
   7  12  -1    1.73    1.81 
   7  12  -1    1.97    0.75 
   7  12  -1    1.81    0.89 
  -7  12   1    2.29    1.90 
   7  12  -1    1.31    0.74 
  -7 -12  -1    0.36    1.05 
  -7  12   1    3.16    1.93 
   7  12  -1    1.82    0.94 
  -7  12   1    3.73    1.91 
   7 -12   1    0.20    1.70 
  -7  12   1    1.60    1.92 
   7 -12   1   -4.74    1.99 
   7 -12   1    0.47    1.89 
  -7 -12  -1    6.24    1.94 
  -7 -12   1    1.97    1.77 
   7 -12  -1   -1.23    1.87 
   7  12   1    3.31    1.04 
   7  12   1    1.97    1.69 
   7 -12  -1    1.67    0.90 
  -7  12  -1    3.01    1.69 
  -7  12  -1    0.56    1.80 
  -7  12  -1    2.30    1.76 
   7 -12  -1    0.07    2.11 
  -7  12  -1    3.06    2.00 
  -7  12  -1    1.59    1.60 
   7 -12  -1    1.91    1.97 
   7 -12  -1    3.03    1.82 
   7  12   1    1.87    1.17 
  -7 -12   1    2.65    0.90 
  -7 -12   1   -0.07    1.78 
  -7 -12   1    3.29    0.97 
   7 -12  -1    2.49    1.67 
   7 -12  -1    0.79    1.67 
   7  12   1    2.85    0.99 
  -7  12  -1    3.61    2.01 
  -7 -12   1    1.66    0.96 
   7  12   1    3.18    1.82 
   8 -12   1   17.76    2.67 
   8  12  -1    9.65    0.90 
   8 -12   1   14.12    2.59 
   8  12  -1   10.53    1.49 
  -8  12   1    4.15    2.08 
  -8  12   1   13.41    2.55 
  -8  12   1   11.96    2.25 
  -8 -12  -1   10.48    1.33 
   8 -12   1    9.31    2.46 
   8 -12   1   10.83    1.27 
   8  12  -1   13.30    2.39 
  -8  12   1    9.35    2.34 
   8 -12   1   11.21    2.22 
  -8  12   1   10.02    1.91 
  -8  12   1   13.08    2.45 
  -8 -12  -1   11.01    1.63 
   8  12  -1   12.26    1.17 
  -8 -12  -1   10.14    1.43 
   8  12  -1   13.10    1.66 
  -8 -12   1   12.60    1.35 
  -8  12  -1    8.72    2.02 
   8 -12  -1   11.14    1.29 
   8  12   1   14.72    2.46 
  -8 -12   1   10.95    1.23 
   8 -12  -1   14.32    2.45 
  -8 -12   1   14.36    1.67 
  -8  12  -1   10.39    2.55 
  -8  12  -1    9.41    2.28 
   8 -12  -1   10.75    2.48 
   8  12   1   10.91    1.40 
   8 -12  -1   11.04    2.37 
   8 -12  -1   11.11    2.15 
  -8  12  -1    7.03    2.45 
  -8 -12   1   12.35    2.41 
  -8  12  -1    9.30    2.34 
  -8 -12   1   10.09    1.06 
   8  12   1   11.06    1.33 
   8  12   1   12.62    1.70 
   8  12   1    9.91    1.48 
  -8  12  -1    9.01    2.97 
  -9  12   1    0.96    2.28 
  -9 -12  -1    1.61    1.27 
   9 -12   1    1.68    2.19 
   9  12  -1    1.28    1.04 
  -9  12   1   -0.07    1.91 
   9  12  -1    1.60    1.02 
   9 -12   1    1.31    0.99 
  -9  12   1    0.11    2.05 
  -9  12   1   -3.14    2.16 
  -9 -12  -1    1.71    1.13 
  -9 -12  -1    1.14    1.20 
   9 -12   1    2.21    2.24 
   9 -12   1   -2.70    2.35 
   9 -12   1    0.80    2.40 
   9  12  -1   -3.28    2.14 
  -9  12   1    4.82    2.33 
  -9 -12   1    2.63    1.05 
  -9 -12   1    0.89    0.76 
   9  12   1    1.21    1.37 
   9 -12  -1    1.61    2.16 
  -9  12  -1   -0.14    2.26 
  -9 -12   1    0.33    1.01 
   9 -12  -1    1.57    1.96 
  -9  12  -1   -0.48    2.49 
  -9 -12   1    3.14    2.13 
  -9  12  -1    3.39    2.17 
   9  12   1   -1.81    2.19 
  -9 -12   1    2.93    0.82 
   9 -12  -1    0.31    2.49 
  -9  12  -1    2.99    2.44 
  -9  12  -1   -0.48    2.34 
 -10  12   1    7.39    2.73 
 -10  12   1    5.28    2.94 
  10 -12   1    1.77    2.82 
 -10  12   1   11.07    2.88 
 -10  12   1    5.99    2.86 
  10  12  -1    6.76    2.61 
  10 -12   1    7.11    2.44 
 -10 -12  -1    6.60    1.56 
 -10  12   1    4.84    2.43 
  10 -12   1   -0.56    2.75 
 -10 -12  -1    5.14    1.28 
 -10 -12   1    2.92    2.57 
 -10  12  -1    5.37    2.95 
  10 -12  -1    6.82    2.34 
  10 -12  -1    7.52    3.02 
  10  12   1    6.99    1.72 
  10  12   1    0.99    2.51 
 -10 -12   1    6.73    1.19 
 -10 -12   1    8.07    1.23 
  10 -12  -1   11.51    3.06 
 -10  12  -1    2.15    2.64 
 -10  12  -1    1.78    2.72 
 -10  12  -1    7.66    2.71 
  11 -12   1   17.04    3.10 
 -11 -12  -1   18.55    2.21 
 -11  12   1   15.74    4.58 
 -11  12   1   17.12    3.54 
  11  12  -1   16.23    3.21 
  11 -12   1    9.78    3.30 
  11 -12   1   11.81    3.97 
 -11  12   1   18.30    4.30 
 -11  12  -1   12.38    3.42 
  11  12   1   11.21    3.08 
 -11  12  -1    4.85    3.68 
 -11 -12   1    9.49    1.30 
  11 -12  -1   14.11    2.84 
 -11  12  -1    7.29    3.30 
 -11 -12   1    8.13    2.96 
  11 -12  -1   14.67    3.59 
   0 -13  -1   28.40    2.16 
   0  13  -1   32.73    2.57 
   0  13   1   30.58    2.38 
   0  13  -1   31.64    2.16 
   0 -13   1   33.70    2.31 
   0  13   1   26.96    2.21 
   0 -13  -1   31.38    2.31 
   0  13  -1   22.18    2.93 
   0  13  -1   30.26    2.13 
   0  13  -1   30.01    2.34 
   0 -13   1   27.72    2.27 
   0 -13   1   33.49    2.71 
   0 -13  -1   31.18    2.41 
   0 -13   1   29.00    2.27 
   0 -13  -1   25.72    2.52 
   0 -13  -1   30.65    2.43 
   0  13   1   27.86    2.43 
   0 -13  -1   30.22    2.76 
   0  13   1   29.17    2.52 
   0 -13   1   27.26    2.53 
   0 -13   1   27.82    2.26 
   0 -13  -1   30.40    2.28 
  -1  13   1    6.87    1.37 
  -1  13   1    6.71    1.52 
   1  13  -1    4.81    1.25 
  -1 -13  -1    6.45    1.11 
   1 -13   1    5.72    1.26 
   1 -13   1    7.59    1.57 
  -1  13   1    6.53    1.32 
   1 -13   1    8.01    1.67 
   1 -13   1    5.91    1.41 
   1 -13   1    6.15    1.32 
  -1 -13  -1    8.19    1.60 
   1 -13   1    8.63    1.44 
  -1 -13  -1    6.33    1.39 
   1  13  -1    7.11    1.38 
  -1 -13  -1    7.96    1.48 
   1 -13   1    8.84    1.61 
  -1 -13  -1    7.89    1.71 
  -1 -13  -1    5.25    1.23 
   1  13  -1    6.03    1.57 
  -1 -13  -1    7.41    1.36 
   1  13  -1    6.09    1.17 
  -1  13   1    9.37    1.58 
  -1  13   1    7.04    1.42 
   1  13   1   10.80    1.71 
   1 -13  -1    8.26    1.41 
  -1  13  -1   11.23    1.76 
  -1  13  -1    8.21    1.38 
  -1  13  -1   10.28    1.63 
   1 -13  -1   10.77    1.56 
   1  13   1   10.02    1.34 
  -1  13  -1    8.46    1.40 
   1 -13  -1   10.97    1.58 
   1 -13  -1    9.56    1.47 
  -1 -13   1   12.32    1.75 
   1  13   1    9.31    1.38 
  -1 -13   1   10.93    1.43 
  -1 -13   1   11.11    1.77 
  -1  13  -1   11.34    1.51 
   1 -13  -1    7.63    1.49 
   1 -13  -1    8.13    1.66 
  -1 -13   1    9.34    1.32 
  -1 -13   1    8.19    1.25 
  -1 -13   1    9.70    1.64 
  -1 -13   1   11.12    1.48 
   1  13   1    9.42    1.70 
   1  13   1   12.18    1.59 
   1 -13  -1    9.95    1.56 
  -2 -13  -1   18.54    2.05 
   2 -13   1   20.38    2.58 
  -2  13   1   16.37    1.88 
  -2 -13  -1   19.78    2.51 
   2  13  -1   20.27    2.48 
  -2  13   1   12.52    1.69 
   2 -13   1   17.95    2.19 
   2  13  -1   20.36    1.91 
   2  13  -1   17.70    1.75 
  -2 -13  -1   15.80    1.93 
   2 -13   1   18.26    2.36 
   2 -13   1   15.91    1.83 
  -2  13   1   13.34    1.69 
   2 -13   1   18.45    2.36 
  -2  13   1   14.32    1.84 
   2  13  -1   12.69    1.70 
   2  13  -1   18.32    1.81 
  -2 -13  -1   15.38    1.55 
   2 -13   1   18.74    2.28 
  -2 -13  -1   15.16    1.95 
  -2  13   1   15.79    2.09 
  -2  13   1   16.51    2.27 
  -2 -13  -1   18.80    2.46 
  -2 -13  -1   20.23    2.04 
   2 -13   1   19.73    2.27 
   2 -13  -1   21.13    2.35 
  -2 -13   1   22.68    1.96 
   2  13   1   20.79    2.52 
   2 -13  -1   19.85    2.34 
   2  13   1   19.05    1.95 
  -2 -13   1   18.52    1.73 
   2 -13  -1   21.40    2.33 
   2 -13  -1   21.33    2.21 
   2  13   1   20.02    1.93 
  -2  13  -1   21.61    2.37 
  -2 -13   1   22.10    2.02 
   2 -13  -1   23.70    2.46 
  -2 -13   1   23.39    2.52 
  -2 -13   1   19.12    2.57 
  -2  13  -1   22.39    2.48 
  -2 -13   1   17.18    1.88 
   2  13   1   20.08    2.09 
   2  13   1   23.13    2.16 
   2 -13  -1   21.89    2.56 
  -2 -13   1   21.55    1.93 
  -2  13  -1   17.91    2.14 
  -2  13  -1   22.50    2.36 
   2 -13  -1   19.58    2.35 
  -2  13  -1   16.88    2.15 
  -3  13   1   54.16    3.11 
   3 -13   1   52.00    3.30 
   3 -13   1   60.02    3.22 
   3  13  -1   51.21    2.59 
  -3  13   1   52.73    3.05 
   3 -13   1   55.24    3.39 
  -3  13   1   61.88    3.35 
   3 -13   1   50.72    3.06 
   3 -13   1   50.68    2.83 
  -3 -13  -1   56.02    2.70 
   3  13  -1   49.77    2.41 
  -3 -13  -1   51.46    2.71 
   3  13  -1   58.19    2.60 
  -3 -13  -1   49.99    2.06 
   3 -13   1   54.32    3.26 
   3  13  -1   49.92    2.48 
  -3 -13  -1   50.92    3.21 
  -3  13   1   55.38    3.31 
  -3 -13  -1   52.28    2.71 
   3  13  -1   50.09    4.61 
  -3  13   1   53.36    3.06 
  -3  13   1   56.56    3.31 
  -3  13  -1   53.58    3.05 
  -3  13  -1   55.53    3.21 
   3 -13  -1   52.48    2.81 
   3  13   1   48.70    2.62 
  -3 -13   1   52.08    3.34 
  -3  13  -1   63.42    3.39 
  -3  13  -1   52.28    3.06 
  -3 -13   1   59.14    4.94 
  -3 -13   1   59.61    2.65 
   3 -13  -1   54.55    3.39 
  -3 -13   1   53.71    2.79 
  -3 -13   1   52.62    2.27 
   3 -13  -1   58.27    3.10 
   3 -13  -1   59.32    4.50 
   3  13   1   54.92    3.94 
  -3  13  -1   60.47    3.31 
  -3 -13   1   58.82    3.12 
  -3 -13   1   52.40    2.55 
   3 -13  -1   56.53    3.23 
   3  13   1   55.78    2.67 
   3  13   1   57.05    2.76 
   3 -13  -1   59.48    3.30 
   3 -13  -1   52.27    3.20 
   3  13   1   51.03    2.57 
   4  13  -1   26.28    2.96 
   4  13  -1   29.47    2.06 
   4 -13   1   24.68    2.45 
   4  13  -1   23.19    1.86 
  -4 -13  -1   28.95    2.12 
   4 -13   1   27.16    2.29 
  -4 -13  -1   23.67    2.00 
   4 -13   1   24.06    2.43 
  -4  13   1   27.19    2.88 
   4 -13   1   22.11    2.79 
  -4 -13  -1   27.77    2.95 
  -4  13   1   21.61    2.56 
  -4  13   1   27.10    2.93 
  -4 -13  -1   21.71    2.14 
   4 -13   1   25.07    2.87 
  -4 -13  -1   22.03    2.15 
  -4  13   1   25.17    2.67 
  -4 -13  -1   22.81    2.80 
  -4  13   1   25.13    2.50 
   4 -13   1   26.88    2.81 
   4 -13   1   27.90    2.72 
  -4  13   1   27.71    3.01 
   4  13  -1   22.66    1.98 
   4  13  -1   22.58    1.73 
  -4  13  -1   29.08    2.75 
  -4 -13   1   28.07    1.96 
  -4  13  -1   24.71    2.69 
   4  13   1   31.75    2.94 
  -4  13  -1   30.28    2.71 
   4 -13  -1   33.19    2.96 
  -4 -13   1   30.67    2.13 
   4  13   1   20.99    2.05 
   4  13   1   29.85    2.29 
  -4 -13   1   26.41    2.92 
   4  13   1   28.08    2.00 
   4 -13  -1   30.61    2.88 
   4 -13  -1   26.82    2.81 
  -4  13  -1   32.56    2.94 
  -4 -13   1   31.47    2.13 
   4  13   1   27.53    2.20 
  -4 -13   1   27.84    2.92 
   4 -13  -1   34.76    2.71 
  -4 -13   1   30.72    2.04 
   4 -13  -1   27.82    2.59 
  -4  13  -1   26.85    2.92 
  -4 -13   1   29.67    1.55 
   4 -13  -1   31.54    2.86 
  -5  13   1   20.34    2.31 
   5  13  -1   21.90    1.64 
   5  13  -1   25.86    3.01 
   5 -13   1   20.88    2.56 
   5 -13   1   18.13    2.14 
  -5 -13  -1   21.40    2.10 
   5 -13   1   26.04    2.92 
  -5 -13  -1   20.34    2.17 
  -5  13   1   27.06    3.56 
   5  13  -1   17.32    1.85 
  -5 -13  -1   24.11    2.12 
   5 -13   1   19.20    2.56 
  -5 -13  -1   28.13    3.08 
   5 -13   1   26.60    3.17 
   5  13  -1   23.85    1.96 
  -5  13   1   17.90    2.14 
   5  13  -1   18.98    1.77 
  -5  13   1   23.86    3.05 
  -5 -13  -1   21.00    2.86 
   5 -13   1   20.78    2.43 
  -5  13   1   23.14    3.09 
  -5 -13  -1   21.07    1.95 
  -5  13   1   21.97    2.56 
   5 -13   1   16.12    2.13 
  -5 -13   1   28.61    1.93 
  -5  13  -1   29.57    3.15 
   5 -13  -1   24.25    2.16 
   5  13   1   23.77    2.11 
   5  13   1   27.65    3.01 
  -5 -13   1   24.08    3.05 
  -5 -13   1   25.95    2.10 
  -5  13  -1   26.21    3.07 
   5  13   1   23.32    2.09 
  -5 -13   1   30.96    3.10 
  -5 -13   1   27.51    1.94 
   5 -13  -1   24.78    2.57 
   5 -13  -1   24.69    2.96 
  -5  13  -1   23.00    2.82 
   5 -13  -1   25.33    2.94 
  -5  13  -1   26.84    2.76 
  -5 -13   1   24.64    1.80 
   5 -13  -1   26.17    3.15 
   5  13   1   20.80    2.08 
   5 -13  -1   25.40    2.72 
  -5  13  -1   23.04    2.73 
   5  13   1   19.50    1.87 
   5 -13  -1   25.05    2.68 
  -5  13  -1   25.13    2.85 
  -6 -13  -1   13.64    1.56 
   6 -13   1   14.16    2.11 
   6 -13   1   13.12    1.81 
   6  13  -1   12.96    1.60 
  -6  13   1   14.52    2.35 
  -6  13   1   17.83    2.33 
   6  13  -1   14.58    2.19 
   6 -13   1   15.75    2.32 
  -6  13   1   12.86    2.33 
   6 -13   1   15.42    2.41 
   6  13  -1   13.87    1.43 
  -6  13   1   15.62    2.03 
  -6  13   1   17.97    2.51 
  -6 -13  -1   15.01    2.26 
  -6  13   1   18.90    2.32 
   6 -13   1   15.37    2.58 
  -6 -13  -1   18.00    1.94 
  -6 -13  -1   12.09    1.41 
   6  13  -1   14.64    1.45 
   6 -13   1   24.27    3.02 
  -6 -13  -1   13.20    1.55 
  -6 -13  -1   13.16    2.21 
   6 -13   1   15.87    2.36 
   6  13   1   12.89    1.76 
   6 -13  -1   16.90    2.43 
  -6 -13   1   10.80    2.19 
  -6 -13   1   14.57    2.21 
  -6 -13   1   14.17    1.69 
   6 -13  -1   13.85    2.18 
  -6  13  -1   14.89    2.33 
   6  13   1   11.62    1.43 
  -6 -13   1   14.25    1.54 
   6 -13  -1   13.09    2.41 
   6  13   1   17.08    2.47 
  -6  13  -1   11.59    2.17 
  -6  13  -1   20.47    2.67 
  -6 -13   1   15.01    1.44 
  -6  13  -1   11.80    2.03 
   6 -13  -1   14.68    2.33 
   6 -13  -1   12.93    1.86 
  -6  13  -1   14.70    2.37 
  -6  13  -1   11.95    1.95 
   6  13   1   16.51    2.02 
  -6 -13   1   15.00    1.66 
   6 -13  -1   14.10    2.32 
   6  13   1   14.27    1.64 
  -7  13   1   21.48    2.67 
  -7  13   1   24.55    2.95 
   7  13  -1   16.36    1.58 
   7 -13   1   19.22    2.50 
  -7 -13  -1   14.42    2.49 
  -7  13   1   21.77    2.76 
   7 -13   1   22.41    2.13 
  -7  13   1   19.33    2.59 
  -7 -13  -1   21.86    2.16 
  -7  13   1   19.33    2.71 
   7  13  -1   17.42    1.90 
   7 -13   1   20.85    2.56 
   7 -13   1   18.66    2.40 
  -7 -13  -1   19.02    1.90 
   7 -13   1   18.30    2.70 
   7 -13   1   17.78    2.58 
  -7 -13  -1   18.70    2.19 
  -7  13   1   22.10    2.88 
   7  13  -1   20.51    1.69 
  -7 -13  -1   14.47    2.52 
   7  13  -1   16.71    2.46 
   7 -13  -1   23.37    2.88 
  -7  13  -1   20.29    2.65 
   7 -13  -1   24.29    3.26 
  -7  13  -1   23.40    2.55 
   7  13   1   22.13    2.30 
   7 -13  -1   20.61    2.73 
   7 -13  -1   24.17    3.18 
  -7  13  -1   26.68    3.14 
   7  13   1   21.93    2.10 
  -7 -13   1   30.10    3.39 
  -7 -13   1   19.86    1.70 
   7 -13  -1   23.49    2.93 
  -7 -13   1   24.27    1.93 
  -7  13  -1   17.46    2.48 
   7 -13  -1   22.89    1.82 
   7  13   1   28.73    3.52 
  -7 -13   1   26.58    1.92 
  -7  13  -1   25.66    2.82 
  -7  13  -1   21.85    2.91 
   7  13   1   21.82    1.93 
   8  13  -1    5.74    0.85 
  -8  13   1    4.33    2.30 
  -8 -13  -1    5.83    1.42 
  -8  13   1    3.71    2.39 
   8 -13   1    3.35    2.36 
   8  13  -1    5.29    1.19 
   8  13  -1    5.72    1.05 
  -8 -13  -1    6.13    2.34 
  -8 -13  -1    5.77    1.23 
   8  13  -1    5.78    0.79 
  -8  13   1    3.36    2.22 
  -8 -13  -1    6.64    1.39 
  -8  13   1    4.26    2.35 
   8 -13   1    1.34    2.08 
  -8 -13  -1    8.40    1.36 
   8 -13   1    5.77    1.26 
   8  13  -1    6.46    2.50 
   8 -13   1    2.00    2.36 
  -8  13   1    5.11    1.99 
  -8 -13   1    8.64    1.03 
   8 -13  -1   12.36    2.34 
  -8 -13   1    9.08    1.24 
  -8  13  -1    3.45    2.18 
  -8  13  -1    6.70    2.44 
  -8  13  -1   12.30    2.47 
  -8 -13   1    8.81    1.07 
   8 -13  -1    5.38    2.43 
   8 -13  -1    8.34    1.07 
   8  13   1    8.53    1.56 
   8  13   1    6.57    1.24 
  -8 -13   1    9.34    1.26 
  -8  13  -1    8.58    2.64 
   8 -13  -1    2.31    2.49 
   8  13   1    9.59    1.43 
  -8  13  -1    8.36    2.30 
  -8 -13   1    9.85    2.47 
   8 -13  -1    9.46    2.52 
   8  13   1    7.78    2.62 
  -9 -13  -1    2.40    1.46 
  -9 -13  -1   -0.80    1.35 
  -9  13   1   -2.53    2.36 
  -9  13   1    0.73    2.17 
  -9 -13  -1    1.74    1.25 
   9 -13   1   -1.19    2.47 
  -9  13   1   -0.94    2.51 
  -9 -13  -1    1.99    2.49 
   9 -13   1    2.29    2.76 
   9  13  -1   -0.24    1.12 
  -9  13   1   -1.02    2.49 
  -9  13   1   -4.05    2.49 
   9  13  -1    0.00    2.52 
   9 -13   1    4.62    2.33 
  -9 -13   1   -0.02    0.74 
  -9 -13   1    2.13    2.26 
   9  13   1   -0.37    1.50 
   9 -13  -1    4.40    2.30 
  -9  13  -1    7.20    2.60 
   9  13   1    1.18    2.52 
  -9 -13   1   -0.48    0.74 
  -9  13  -1    3.89    2.68 
  -9  13  -1    0.54    2.23 
  -9  13  -1   -2.56    2.66 
  -9 -13   1    2.05    1.07 
  -9 -13   1    1.02    1.11 
   9 -13  -1   -4.17    2.75 
   9 -13  -1    0.14    2.56 
  10 -13   1    1.83    2.63 
 -10 -13  -1    3.22    2.81 
 -10  13   1    9.25    3.10 
 -10 -13  -1    3.62    1.34 
  10 -13   1   -0.45    2.65 
 -10  13   1    1.67    2.86 
  10  13  -1    2.77    2.74 
 -10  13   1    4.24    3.13 
 -10 -13  -1   -0.34    1.47 
  10 -13   1    3.20    3.19 
 -10 -13   1    3.31    1.18 
  10 -13  -1    4.77    3.43 
 -10 -13   1    2.17    1.21 
 -10 -13   1    5.68    2.78 
 -10  13  -1    4.93    4.99 
 -10  13  -1    5.43    3.20 
  10  13   1    3.10    2.80 
  10  13   1    5.39    2.05 
 -10  13  -1    4.98    3.00 
 -10  13  -1    5.95    2.99 
  10 -13  -1    2.38    2.50 
  10 -13  -1    1.78    2.69 
   0 -14   1   42.25    2.71 
   0  14  -1   34.73    2.53 
   0  14  -1   42.03    2.95 
   0  14   1   42.96    2.82 
   0 -14   1   36.10    2.94 
   0 -14  -1   38.23    2.58 
   0 -14  -1   38.75    2.67 
   0 -14  -1   34.84    2.59 
   0 -14   1   35.88    2.55 
   0  14  -1   39.65    2.52 
   0  14   1   39.33    2.65 
   0 -14   1   36.00    3.47 
   0  14   1   31.28    2.46 
   0 -14  -1   40.81    2.95 
   0 -14   1   34.67    3.13 
   0  14  -1   38.39    2.70 
   0  14   1   42.03    2.97 
   0 -14   1   40.18    3.41 
   0 -14   1   39.69    2.66 
   0  14   1   42.69    2.80 
   1 -14   1   14.87    1.85 
  -1  14   1   17.50    2.37 
   1 -14   1   14.14    1.70 
  -1 -14  -1   10.73    1.82 
  -1 -14  -1   19.39    2.12 
  -1 -14  -1   15.86    2.09 
  -1 -14  -1   15.65    2.09 
   1  14  -1   14.63    1.77 
  -1  14   1   15.30    1.85 
  -1  14   1   16.30    1.89 
   1 -14   1   12.32    1.75 
  -1 -14  -1   14.40    2.81 
  -1 -14  -1   17.23    1.91 
  -1  14   1   14.48    1.93 
   1 -14   1   13.01    2.26 
   1  14  -1   16.78    1.89 
   1  14  -1   16.15    2.07 
   1  14  -1   11.27    1.55 
  -1  14   1   14.80    1.79 
  -1 -14  -1   11.84    1.66 
   1 -14   1   21.35    2.40 
   1  14  -1   14.62    2.07 
   1 -14   1   16.33    2.32 
   1  14   1    8.85    2.39 
   1 -14  -1   11.79    1.75 
  -1  14  -1   12.65    1.75 
   1 -14  -1   15.31    1.90 
  -1 -14   1   10.60    1.40 
  -1 -14   1   11.52    1.61 
   1 -14  -1   11.18    1.58 
  -1  14  -1   12.99    1.89 
  -1  14  -1   15.23    2.14 
   1  14   1   11.55    1.57 
   1 -14  -1   12.96    2.67 
   1  14   1   13.20    1.65 
   1 -14  -1    9.28    2.06 
   1  14   1   10.10    1.73 
  -1 -14   1   11.36    1.96 
  -1 -14   1   12.29    1.57 
   1  14   1   13.97    2.03 
   1 -14  -1   13.63    1.87 
  -1 -14   1   14.87    2.06 
  -1 -14   1   12.62    1.59 
  -1 -14   1   13.49    1.90 
  -2 -14  -1   19.74    2.19 
   2 -14   1   26.42    2.86 
   2 -14   1   19.84    2.25 
   2  14  -1   22.84    2.00 
   2  14  -1   18.04    1.99 
   2 -14   1   24.42    2.50 
  -2  14   1   21.22    2.41 
  -2 -14  -1   20.44    1.82 
  -2 -14  -1   23.93    2.73 
  -2  14   1   24.44    2.75 
   2  14  -1   28.76    2.83 
  -2 -14  -1   21.01    2.90 
   2  14  -1   21.45    2.16 
  -2 -14  -1   26.91    2.75 
   2  14  -1   20.74    2.00 
  -2  14   1   21.70    2.43 
  -2 -14  -1   22.40    2.14 
   2 -14   1   19.86    2.51 
   2 -14   1   17.34    1.93 
   2 -14   1   25.72    2.56 
  -2 -14  -1   21.61    2.30 
  -2  14   1   23.91    2.68 
  -2  14  -1   19.48    2.56 
   2 -14  -1   21.10    2.43 
  -2 -14   1   17.19    1.87 
  -2 -14   1   19.50    2.09 
   2 -14  -1   24.05    3.11 
   2  14   1   18.43    2.24 
  -2 -14   1   20.76    2.16 
   2  14   1   20.91    2.34 
  -2  14  -1   18.54    2.39 
   2 -14  -1   22.86    2.62 
  -2  14  -1   25.00    2.64 
  -2 -14   1   21.61    2.87 
   2  14   1   22.83    2.16 
  -2  14  -1   17.06    2.36 
  -2 -14   1   21.22    2.08 
  -2 -14   1   24.04    2.16 
   2  14   1   19.62    2.14 
   2 -14  -1   22.67    2.58 
   2 -14  -1   19.30    2.46 
  -2  14  -1   26.34    2.71 
   2 -14  -1   23.00    2.47 
   2 -14  -1   24.49    2.39 
   2  14   1   19.43    2.50 
  -2 -14   1   20.81    2.73 
  -3 -14  -1    0.29    1.16 
   3 -14   1    1.76    1.54 
   3  14  -1    0.80    1.12 
   3 -14   1    0.51    1.59 
  -3 -14  -1   -0.04    1.57 
  -3  14   1   -0.99    1.39 
  -3  14   1   -0.32    1.28 
  -3  14   1   -1.70    1.57 
   3  14  -1   -0.12    1.01 
   3  14  -1    0.10    1.15 
  -3  14   1   -1.09    1.60 
  -3 -14  -1    1.21    1.17 
   3 -14   1    1.23    1.54 
  -3  14   1    0.14    1.34 
   3  14  -1    0.40    1.64 
  -3 -14  -1    2.02    2.13 
   3  14  -1    1.77    1.00 
  -3 -14  -1    0.46    0.78 
   3 -14   1    2.37    1.56 
   3 -14   1   -0.83    1.28 
  -3  14   1    0.13    1.52 
  -3 -14  -1    1.15    1.18 
  -3 -14  -1    1.61    1.69 
   3 -14   1   -0.13    1.59 
   3 -14  -1    2.71    1.37 
   3  14   1    1.97    1.64 
   3 -14  -1    1.86    1.65 
   3 -14  -1    3.03    1.56 
   3 -14  -1    0.44    1.66 
  -3 -14   1   -0.20    1.14 
  -3 -14   1    0.22    1.12 
   3 -14  -1    3.55    1.62 
  -3  14  -1    1.38    1.45 
  -3 -14   1    0.88    0.86 
  -3  14  -1    3.47    1.66 
   3  14   1   -0.58    1.04 
   3  14   1    1.75    1.20 
  -3  14  -1    0.25    1.38 
   3  14   1    2.00    1.08 
   3 -14  -1   -0.34    1.38 
   3  14   1    1.15    1.28 
  -3 -14   1    1.71    1.55 
  -3 -14   1    0.97    1.65 
  -3  14  -1    2.07    1.61 
  -3 -14   1   -0.72    1.13 
  -3  14  -1    0.31    1.30 
  -3 -14   1   -0.84    1.07 
  -4  14   1   22.52    2.82 
   4  14  -1   19.07    1.96 
   4 -14   1   17.98    2.26 
   4 -14   1   21.74    2.82 
  -4  14   1   15.92    2.13 
   4 -14   1   17.70    2.30 
   4 -14   1   19.19    2.39 
  -4 -14  -1   15.96    2.37 
  -4  14   1   21.78    2.72 
   4  14  -1   18.77    2.42 
  -4  14   1   23.27    3.04 
   4  14  -1   18.62    1.97 
   4 -14   1   20.92    2.86 
   4  14  -1   18.25    1.81 
  -4 -14  -1   14.73    2.07 
  -4 -14  -1   22.60    2.96 
   4 -14   1   18.13    2.40 
  -4 -14  -1   19.88    1.06 
  -4  14   1   25.90    3.05 
  -4 -14  -1   17.82    1.82 
   4  14  -1   18.63    2.01 
  -4 -14  -1   19.04    2.17 
   4 -14   1   19.02    2.29 
  -4  14   1   19.84    2.37 
   4 -14  -1   22.25    2.54 
  -4  14  -1   16.44    2.01 
  -4  14  -1   18.43    2.62 
   4 -14  -1   20.96    2.45 
  -4 -14   1   22.05    2.07 
  -4 -14   1   22.74    2.11 
  -4 -14   1   17.95    2.37 
   4 -14  -1   14.91    3.20 
   4 -14  -1   17.30    2.30 
  -4 -14   1   18.93    2.33 
  -4  14  -1   19.51    2.79 
  -4 -14   1   17.18    1.90 
   4  14   1   16.84    2.09 
   4 -14  -1   18.27    2.28 
  -4  14  -1   18.75    2.40 
  -4  14  -1   20.97    2.72 
  -4 -14   1   22.07    2.03 
   4 -14  -1   20.45    2.78 
   4  14   1   18.20    2.00 
   4  14   1   22.07    2.98 
   4  14   1   18.53    2.22 
   4  14   1   20.84    2.15 
  -4 -14   1   15.93    1.43 
   4 -14  -1   15.62    2.17 
  -5 -14  -1   20.77    2.25 
  -5  14   1   23.19    2.88 
  -5 -14  -1   18.67    2.35 
  -5  14   1   21.62    2.60 
  -5  14   1   18.49    2.37 
  -5 -14  -1   25.11    3.19 
  -5  14   1   17.81    2.42 
  -5 -14  -1   18.02    2.07 
  -5  14   1   19.92    2.78 
   5 -14   1   18.93    2.33 
  -5 -14  -1   22.04    2.23 
   5 -14   1   19.87    2.41 
   5  14  -1   21.05    2.12 
   5 -14   1   22.16    2.67 
  -5 -14  -1   18.48    2.41 
   5 -14   1   22.37    3.12 
  -5  14   1   17.27    2.38 
   5  14  -1   19.70    1.75 
   5 -14   1   19.80    2.37 
   5 -14   1   22.95    3.13 
   5 -14   1   17.82    2.28 
   5  14  -1   18.32    2.38 
   5  14  -1   16.03    1.90 
  -5 -14   1   22.85    2.03 
   5 -14  -1   22.83    3.19 
   5 -14  -1   22.34    3.00 
   5 -14  -1   23.11    2.32 
  -5 -14   1   26.73    3.38 
  -5  14  -1   20.38    2.91 
  -5 -14   1   16.45    2.45 
   5 -14  -1   23.44    2.85 
   5  14   1   25.57    2.28 
  -5  14  -1   19.61    2.32 
   5  14   1   20.21    2.02 
  -5 -14   1   22.01    2.05 
  -5 -14   1   19.52    2.13 
   5  14   1   18.49    2.33 
  -5  14  -1   21.52    2.59 
   5 -14  -1   20.66    2.62 
  -5  14  -1   19.03    2.71 
   5 -14  -1   24.13    3.16 
  -5  14  -1   21.80    4.02 
  -5 -14   1   22.17    1.88 
   5  14   1   23.25    2.64 
   5  14   1   18.48    2.24 
   5 -14  -1   23.91    4.47 
  -6  14   1   19.25    2.53 
  -6 -14  -1   21.15    2.26 
  -6 -14  -1   14.93    1.62 
  -6  14   1   18.64    2.68 
   6 -14   1   20.89    2.63 
   6 -14   1   17.02    2.40 
  -6  14   1   14.77    2.07 
   6  14  -1   14.81    1.60 
  -6  14   1   16.53    2.57 
  -6 -14  -1   15.79    1.68 
   6  14  -1   15.48    1.64 
  -6  14   1   17.70    2.60 
  -6 -14  -1   18.38    2.50 
  -6 -14  -1   18.86    2.37 
  -6  14   1   20.43    3.18 
   6 -14   1   17.85    2.64 
   6 -14   1   23.93    3.27 
   6 -14   1   16.91    2.43 
   6  14  -1   17.93    1.82 
   6  14  -1   13.03    1.52 
   6 -14   1   16.96    2.35 
   6  14  -1   12.86    2.47 
  -6 -14   1   12.94    2.30 
   6 -14  -1   17.95    2.42 
   6  14   1   13.01    1.73 
   6  14   1   15.11    1.89 
  -6  14  -1   13.73    2.51 
   6 -14  -1   17.12    2.62 
  -6  14  -1   18.10    2.48 
   6 -14  -1   10.69    2.41 
   6 -14  -1   15.54    2.08 
   6  14   1   16.68    2.56 
  -6 -14   1   13.81    1.90 
   6  14   1   17.49    2.17 
  -6  14  -1   17.39    2.36 
   6  14   1   13.66    1.91 
  -6 -14   1   12.88    1.52 
  -6  14  -1   15.71    2.47 
  -6 -14   1   13.50    1.82 
  -6 -14   1   15.01    1.74 
  -6  14  -1   18.11    2.67 
   6 -14  -1   15.95    2.59 
   7 -14   1   -1.39    2.14 
   7 -14   1   -0.11    2.01 
  -7 -14  -1    0.68    1.25 
  -7  14   1   -1.07    2.17 
   7  14  -1   -0.89    1.19 
   7  14  -1    0.65    1.04 
  -7 -14  -1   -0.73    1.14 
   7 -14   1    5.57    2.29 
   7  14  -1    0.57    0.88 
  -7  14   1    1.51    1.98 
  -7 -14  -1    1.46    1.31 
   7  14  -1   -2.00    2.08 
   7 -14   1    2.00    2.09 
   7  14  -1    0.27    0.93 
  -7 -14  -1    0.89    1.31 
  -7  14   1   -1.74    1.83 
  -7 -14  -1    2.96    2.20 
  -7  14   1   -1.23    2.26 
  -7  14  -1   -0.52    2.00 
  -7 -14   1   -0.88    1.04 
  -7  14  -1    2.19    2.08 
   7 -14  -1    2.31    2.06 
   7 -14  -1    2.08    2.32 
  -7  14  -1    1.16    2.07 
  -7  14  -1    0.71    2.14 
  -7  14  -1    1.59    2.06 
  -7 -14   1   -1.10    2.04 
   7 -14  -1    3.35    2.15 
   7  14   1    1.04    1.14 
  -7 -14   1    1.21    1.11 
   7  14   1    2.25    2.35 
   7 -14  -1    2.08    1.22 
   7  14   1    0.63    1.42 
  -7 -14   1    0.34    1.15 
   7 -14  -1    3.03    2.34 
   8  14  -1   15.43    2.98 
   8  14  -1   16.34    2.08 
  -8  14   1   14.70    2.85 
  -8 -14  -1   18.39    2.35 
   8 -14   1   11.88    2.77 
   8 -14   1   14.10    2.93 
  -8  14   1    9.45    2.60 
  -8 -14  -1    8.63    2.79 
   8  14  -1    9.99    1.26 
  -8  14   1   14.69    2.92 
  -8 -14  -1   11.42    1.59 
   8  14  -1   13.81    1.45 
   8 -14   1    7.43    2.55 
  -8  14   1   11.22    2.76 
  -8 -14  -1   11.64    1.70 
   8 -14   1    7.27    2.53 
  -8  14   1    8.50    2.41 
  -8 -14   1   12.93    1.66 
   8 -14  -1   11.95    2.54 
  -8 -14   1   17.41    2.03 
  -8 -14   1   16.57    1.58 
  -8 -14   1   13.99    1.48 
   8 -14  -1   13.80    2.99 
   8  14   1   18.93    2.81 
   8 -14  -1   16.18    2.96 
   8  14   1   15.68    1.92 
   8 -14  -1   19.62    3.24 
  -8  14  -1   14.24    2.82 
  -8 -14   1   17.15    2.76 
  -8  14  -1   17.87    3.09 
  -8  14  -1   17.11    2.79 
  -8  14  -1   14.89    2.78 
   9 -14   1    3.06    2.97 
  -9  14   1    4.09    2.71 
   9 -14   1   -0.76    2.97 
  -9  14   1   -3.19    2.62 
  -9 -14  -1    0.14    1.46 
   9 -14   1    2.32    2.67 
  -9  14   1    3.99    2.96 
  -9 -14  -1    0.82    1.35 
  -9  14   1    1.08    2.73 
   9  14  -1   -2.00    2.74 
  -9 -14  -1   -4.31    2.61 
  -9  14  -1    4.66    2.75 
  -9 -14   1    4.97    1.22 
   9  14   1    2.88    1.73 
  -9  14  -1    0.88    2.99 
   9 -14  -1    3.39    2.96 
   9  14   1    4.27    2.58 
  -9  14  -1    0.68    2.82 
  -9  14  -1   -4.70    2.58 
  -9 -14   1    3.48    1.15 
   9 -14  -1    1.94    2.88 
   9 -14  -1   -2.78    2.45 
  -9 -14   1    2.99    2.53 
  10 -14   1    2.89    3.19 
 -10 -14  -1    3.25    1.44 
 -10  14   1   10.16    3.50 
 -10  14   1    2.96    3.72 
  10 -14   1    3.10    3.05 
  10 -14   1    0.90    3.18 
 -10 -14  -1    4.16    1.61 
  10  14  -1    7.96    3.08 
 -10 -14  -1    0.83    3.06 
 -10  14  -1   -3.31    3.20 
 -10  14  -1    2.34    3.38 
 -10 -14   1    6.41    1.24 
 -10 -14   1    2.99    1.71 
  10 -14  -1    2.09    2.97 
  10 -14  -1    8.43    3.01 
  10  14   1   13.46    3.25 
 -10 -14   1    6.99    2.89 
  10 -14  -1   -1.24    3.45 
   0 -15   1    2.14    1.42 
   0 -15   1    4.18    1.57 
   0 -15   1    3.11    1.75 
   0 -15   1    3.65    1.36 
   0  15  -1    3.80    1.60 
   0  15   1    3.44    1.39 
   0 -15   1    4.27    1.74 
   0 -15  -1    2.70    1.46 
   0 -15  -1    4.15    1.33 
   0 -15  -1    4.66    1.58 
   0 -15  -1    5.25    1.57 
   0 -15   1    3.31    1.31 
   0 -15  -1    3.12    1.44 
   0  15   1    7.26    1.59 
   0  15   1    2.33    1.56 
   0 -15   1    3.34    1.49 
   0 -15  -1    4.04    1.72 
   0  15   1    2.61    1.48 
   0  15  -1    3.87    1.76 
   0  15  -1    4.20    1.30 
   0 -15  -1    1.35    1.57 
  -1 -15  -1    5.82    1.82 
  -1 -15  -1    2.28    1.65 
   1  15  -1    3.70    1.27 
   1  15  -1    3.65    1.40 
  -1  15   1    2.64    1.49 
   1 -15   1    0.26    1.34 
   1 -15   1    2.05    1.52 
  -1 -15  -1    2.23    1.26 
  -1 -15  -1    2.72    1.46 
  -1  15   1    2.62    1.53 
  -1 -15  -1    1.10    1.15 
  -1 -15  -1    1.81    1.40 
   1 -15   1    2.08    1.60 
  -1  15   1    0.80    1.70 
   1 -15   1    1.48    1.44 
   1 -15   1    4.24    1.80 
  -1 -15  -1    0.52    1.33 
   1 -15   1    2.03    1.44 
   1  15  -1    1.19    1.22 
   1  15  -1    1.80    1.56 
  -1  15   1    2.17    1.38 
   1  15  -1   -0.32    1.41 
   1  15   1    4.99    1.63 
  -1 -15   1    5.65    1.46 
   1 -15  -1    6.09    1.73 
   1 -15  -1    1.87    1.53 
   1 -15  -1    4.82    1.60 
  -1 -15   1    5.38    1.45 
  -1 -15   1    3.09    1.24 
  -1 -15   1    3.23    1.27 
  -1  15  -1    3.60    1.53 
  -1 -15   1    7.39    2.04 
   1  15   1    3.53    1.45 
   1 -15  -1    2.64    1.62 
   1  15   1    2.94    1.68 
  -1 -15   1    1.62    1.36 
   1 -15  -1    2.98    1.36 
   1  15   1    4.23    1.39 
  -1  15  -1    3.60    1.54 
  -1  15  -1    3.58    1.66 
   1 -15  -1    3.13    1.42 
  -1 -15   1    2.57    1.66 
   1 -15  -1    2.51    1.69 
  -2  15   1   35.96    3.05 
   2  15  -1   38.52    2.53 
   2  15  -1   42.85    2.79 
   2  15  -1   38.95    3.38 
  -2  15   1   39.79    3.06 
  -2 -15  -1   46.25    3.38 
   2 -15   1   44.15    3.15 
   2 -15   1   43.93    3.22 
   2 -15   1   43.23    3.11 
  -2 -15  -1   42.41    2.89 
   2 -15   1   35.42    3.11 
  -2  15   1   42.45    3.33 
  -2 -15  -1   40.42    2.84 
   2 -15   1   39.44    3.13 
  -2  15   1   43.02    3.28 
   2 -15   1   40.80    3.14 
   2 -15   1   45.68    3.49 
   2  15  -1   35.60    2.50 
  -2 -15  -1   44.04    2.72 
  -2 -15  -1   35.27    3.28 
   2  15  -1   42.62    2.85 
  -2 -15  -1   36.43    2.74 
  -2 -15  -1   35.22    2.28 
   2  15   1   35.33    2.80 
   2 -15  -1   43.07    3.12 
   2 -15  -1   42.27    3.29 
  -2 -15   1   38.88    2.70 
  -2 -15   1   40.02    2.66 
  -2  15  -1   39.23    2.93 
   2  15   1   35.84    2.70 
  -2 -15   1   41.54    2.67 
  -2  15  -1   36.39    2.87 
  -2 -15   1   40.42    3.45 
   2 -15  -1   43.02    3.39 
  -2 -15   1   37.76    2.41 
   2  15   1   40.56    2.99 
  -2  15  -1   40.11    2.77 
   2  15   1   38.41    2.73 
  -2 -15   1   37.10    3.41 
   2 -15  -1   38.22    2.96 
  -2  15  -1   42.75    3.11 
   2 -15  -1   39.18    3.11 
  -2 -15   1   35.84    2.60 
  -2  15  -1   38.94    3.27 
   2  15   1   40.26    3.35 
   2 -15  -1   38.58    2.87 
   2 -15  -1   39.73    3.14 
  -3 -15  -1   15.21    2.20 
   3  15  -1   14.11    2.24 
   3 -15   1   14.63    1.94 
   3  15  -1   11.30    1.55 
   3  15  -1   15.71    2.16 
   3 -15   1   10.05    1.96 
  -3 -15  -1   11.16    1.55 
   3 -15   1   20.96    2.90 
  -3 -15  -1   13.34    1.70 
  -3 -15  -1   14.85    1.78 
   3 -15   1   10.50    2.00 
  -3  15   1   15.13    2.32 
  -3  15   1   12.69    1.96 
  -3  15   1   10.71    2.04 
  -3 -15  -1   15.67    2.42 
  -3 -15  -1   10.73    1.64 
   3 -15   1   12.21    1.97 
  -3 -15  -1   16.85    2.31 
   3 -15   1   15.61    2.24 
   3 -15   1   13.85    2.04 
   3  15  -1   10.94    1.45 
   3  15  -1   13.29    1.65 
  -3  15   1   12.61    3.33 
   3  15   1   13.63    1.72 
  -3 -15   1   14.43    2.25 
   3 -15  -1   15.57    2.19 
  -3 -15   1   13.91    1.72 
   3 -15  -1   16.30    2.25 
  -3 -15   1   17.54    2.28 
  -3  15  -1   16.68    2.24 
  -3 -15   1   15.04    2.13 
  -3 -15   1   13.21    1.35 
   3 -15  -1   15.24    2.14 
   3 -15  -1   17.18    2.31 
   3 -15  -1   13.88    2.04 
   3 -15  -1   15.43    1.91 
  -3 -15   1   14.39    2.30 
   3  15   1   17.77    2.42 
   3  15   1   20.49    2.51 
  -3  15  -1   12.89    2.12 
  -3  15  -1   14.21    2.09 
  -3  15  -1   13.61    2.08 
  -3  15  -1   15.23    2.21 
   3  15   1   16.18    1.86 
   3 -15  -1   17.07    2.25 
   3  15   1   12.83    1.64 
  -3 -15   1   21.29    2.25 
  -4 -15  -1    2.24    1.36 
   4  15  -1    3.86    1.32 
  -4 -15  -1    4.35    2.76 
  -4 -15  -1    1.91    1.38 
  -4  15   1    2.93    1.82 
   4  15  -1    3.44    1.11 
   4 -15   1    1.52    1.94 
  -4  15   1    2.72    3.06 
   4 -15   1    0.92    1.72 
   4 -15   1    3.87    1.95 
   4  15  -1    1.55    1.33 
  -4  15   1    3.38    1.87 
  -4 -15  -1    4.77    1.47 
   4 -15   1    1.68    1.82 
   4 -15   1    5.69    1.93 
  -4 -15  -1    3.25    1.43 
  -4  15   1    3.83    1.77 
   4 -15   1    6.24    2.08 
   4 -15   1    5.38    1.61 
  -4  15   1    3.71    1.87 
   4  15  -1    3.39    1.30 
  -4 -15  -1    4.16    2.11 
   4  15  -1    1.93    1.96 
  -4  15   1    2.76    2.29 
   4 -15  -1    2.57    1.99 
   4  15   1    5.21    2.06 
   4  15   1    4.69    1.28 
  -4 -15   1    4.96    1.30 
  -4  15  -1    2.83    1.77 
  -4 -15   1    5.44    1.35 
   4 -15  -1    1.53    1.82 
   4  15   1    5.25    1.49 
   4 -15  -1    1.75    1.49 
   4  15   1    5.26    1.44 
  -4 -15   1    3.28    1.30 
  -4  15  -1    5.43    1.84 
  -4  15  -1    4.41    1.87 
   4  15   1    4.70    1.45 
  -4 -15   1    4.93    1.31 
  -4 -15   1    4.88    2.03 
   4 -15  -1    6.01    1.86 
  -4  15  -1    5.82    2.04 
   4 -15  -1    1.23    1.71 
  -4 -15   1    0.24    3.00 
   4 -15  -1    2.78    1.81 
  -4 -15   1    4.79    0.89 
   4 -15  -1    4.86    2.09 
  -5 -15  -1    7.37    1.53 
  -5 -15  -1    7.17    1.61 
   5 -15   1    7.89    2.19 
   5 -15   1    6.92    2.06 
  -5  15   1    8.85    2.09 
  -5 -15  -1    6.11    1.45 
  -5  15   1    8.78    2.18 
   5  15  -1    4.54    1.59 
  -5  15   1    6.53    2.12 
  -5  15   1    9.54    2.01 
   5  15  -1    6.92    2.31 
   5 -15   1    7.08    2.12 
  -5  15   1    7.72    2.30 
   5 -15   1    7.60    2.22 
  -5 -15  -1    5.93    2.14 
   5  15  -1    8.28    1.49 
   5 -15   1    8.08    2.56 
   5  15  -1    8.57    1.23 
   5 -15   1    7.08    2.35 
   5 -15   1    8.45    1.69 
  -5 -15  -1    5.79    1.41 
   5  15  -1    6.19    1.64 
   5 -15  -1   12.98    2.53 
  -5  15  -1    8.42    2.30 
   5 -15  -1   11.59    1.71 
   5  15   1   12.90    2.47 
  -5 -15   1    7.70    1.39 
   5 -15  -1   13.02    2.45 
  -5 -15   1   10.30    1.57 
  -5 -15   1   11.43    1.55 
   5 -15  -1    9.01    2.25 
  -5 -15   1   12.68    2.51 
  -5  15  -1    9.20    2.16 
   5 -15  -1    6.91    2.09 
  -5  15  -1    7.25    2.09 
   5 -15  -1   16.71    2.52 
   5  15   1   11.35    1.66 
  -5  15  -1    7.77    2.16 
   5  15   1   10.93    1.50 
   5 -15  -1   12.83    2.25 
  -5 -15   1    8.83    1.37 
   5  15   1    9.93    1.71 
   6  15  -1    1.71    1.07 
  -6  15   1    1.76    2.30 
  -6  15   1    5.65    2.36 
   6 -15   1    0.48    2.37 
  -6  15   1    0.04    2.07 
   6 -15   1    5.41    2.11 
  -6 -15  -1    3.27    2.33 
   6 -15   1    4.63    1.58 
   6 -15   1    3.53    2.43 
   6 -15   1    1.78    2.21 
  -6  15   1    0.74    1.93 
  -6 -15  -1    2.75    1.41 
   6  15  -1    0.93    1.21 
   6 -15   1    1.12    2.24 
  -6 -15  -1    1.24    1.50 
  -6 -15  -1    1.74    1.41 
   6  15  -1   -0.46    2.15 
  -6 -15  -1    1.75    1.32 
   6  15  -1    3.34    1.38 
  -6  15   1    6.03    2.42 
   6  15   1    2.35    1.55 
  -6 -15   1    0.71    1.19 
  -6  15  -1    2.31    2.18 
   6 -15  -1   -1.07    2.26 
   6  15   1    0.92    2.04 
  -6 -15   1    1.29    1.12 
  -6 -15   1    1.04    1.22 
   6 -15  -1   -0.57    2.14 
  -6 -15   1    1.63    1.34 
   6 -15  -1    5.71    2.93 
   6 -15  -1    2.36    1.41 
   6  15   1    3.80    1.43 
  -6  15  -1    4.49    2.24 
  -6  15  -1    2.09    2.08 
  -6 -15   1    0.77    2.24 
   6 -15  -1    1.44    2.02 
   6  15   1    2.75    1.22 
   6 -15  -1    2.17    2.16 
   7 -15   1    3.61    2.76 
  -7 -15  -1    6.07    1.59 
  -7 -15  -1    4.21    1.51 
   7  15  -1    3.09    1.06 
   7 -15   1    4.22    2.46 
  -7  15   1    4.67    2.48 
   7 -15   1    0.05    1.56 
  -7  15   1   -1.19    2.48 
   7  15  -1    1.83    1.35 
  -7  15   1    2.18    2.46 
  -7  15   1    2.93    2.53 
   7 -15   1    0.17    2.56 
  -7 -15  -1    2.95    1.43 
   7  15  -1    3.00    2.55 
  -7 -15  -1    6.19    2.50 
   7 -15   1    3.54    2.67 
   7  15   1    4.94    1.73 
   7  15   1    2.06    2.31 
   7 -15  -1    2.19    2.42 
  -7  15  -1    6.73    3.85 
  -7  15  -1   -0.30    2.96 
  -7  15  -1    6.59    2.68 
   7 -15  -1    4.45    1.64 
   7 -15  -1    2.40    2.34 
  -7 -15   1    1.76    1.56 
  -7 -15   1    4.95    1.33 
   7 -15  -1    2.40    2.36 
   7  15   1    4.57    1.79 
   7 -15  -1    8.04    2.72 
  -7 -15   1    4.60    2.31 
  -7 -15   1    3.92    1.33 
  -8  15   1    2.93    2.73 
  -8  15   1   13.12    2.84 
   8 -15   1    8.58    2.75 
   8 -15   1   13.83    3.26 
   8  15  -1   10.38    2.86 
  -8  15   1   10.13    4.38 
   8 -15   1    5.27    2.75 
  -8  15   1   11.94    3.12 
   8  15  -1    8.28    1.52 
   8 -15   1   11.82    3.23 
  -8 -15  -1   18.20    3.18 
  -8 -15  -1    9.45    1.61 
  -8 -15  -1   13.71    1.80 
   8  15   1   13.28    2.98 
  -8  15  -1    6.78    2.97 
   8 -15  -1    8.34    2.70 
  -8 -15   1   11.19    1.48 
   8 -15  -1    7.04    2.88 
  -8 -15   1    4.29    2.58 
   8 -15  -1    9.39    2.81 
  -8 -15   1    7.68    1.42 
  -8  15  -1   12.30    3.12 
  -9 -15  -1    1.34    2.82 
  -9 -15  -1    3.95    1.48 
   9 -15   1   -1.08    3.24 
  -9  15   1    2.52    2.70 
   9  15  -1    3.93    2.97 
  -9  15   1    4.15    3.15 
  -9 -15  -1    3.85    1.65 
   9 -15   1    2.67    3.21 
  -9  15   1   -0.54    2.96 
   9 -15   1   -4.75    2.79 
  -9  15  -1   -0.75    2.98 
  -9  15  -1   -2.13    2.98 
   9  15   1    1.73    2.94 
  -9 -15   1    0.93    1.25 
  -9 -15   1   -0.46    2.78 
   9 -15  -1    1.77    2.90 
   9 -15  -1    5.63    3.23 
  -9 -15   1    1.54    1.43 
   9 -15  -1   -5.73    3.13 
   0  16   1    1.25    1.45 
   0  16   1    1.14    1.52 
   0  16  -1   -2.02    1.48 
   0 -16   1   -1.00    1.34 
   0  16   1   -0.72    1.63 
   0 -16  -1    2.13    1.77 
   0 -16   1    0.89    1.56 
   0 -16  -1   -3.09    1.45 
   0 -16  -1   -0.11    1.44 
   0 -16   1    3.77    1.99 
   0 -16   1    1.39    1.50 
   0 -16  -1   -1.35    1.57 
   0 -16  -1   -0.63    1.32 
   0  16  -1    3.77    1.48 
   0 -16  -1    0.77    1.61 
   0 -16  -1   -1.69    1.79 
   0  16   1    0.95    1.57 
   0 -16   1   -0.25    1.53 
   0  16  -1   -0.26    1.66 
   0  16   1   -1.09    1.55 
   0 -16   1   -0.67    1.36 
   0 -16   1    1.82    1.77 
   1  16  -1   17.22    2.57 
   1  16  -1   18.19    2.14 
  -1 -16  -1   14.44    1.71 
  -1 -16  -1   14.44    2.09 
   1 -16   1   12.23    1.89 
  -1  16   1   15.98    2.21 
   1  16  -1   13.12    1.87 
   1 -16   1   13.02    2.00 
  -1 -16  -1   12.56    1.90 
  -1 -16  -1   16.32    2.49 
  -1 -16  -1   20.15    2.55 
   1 -16   1   14.24    2.04 
  -1 -16  -1   16.35    2.38 
   1  16  -1   12.81    2.07 
   1  16  -1   13.40    1.90 
   1 -16   1   11.17    2.18 
   1 -16   1   16.37    2.26 
  -1  16   1   10.01    1.90 
  -1 -16  -1   12.67    1.81 
  -1  16   1   16.44    2.23 
   1 -16   1   16.61    2.19 
   1 -16   1   14.55    2.10 
   1 -16  -1   12.31    2.03 
   1  16   1   14.94    2.05 
  -1 -16   1   10.54    1.65 
   1 -16  -1   12.14    2.09 
  -1 -16   1   10.68    1.80 
  -1 -16   1   10.10    2.24 
   1  16   1   11.27    2.32 
  -1  16  -1   11.05    1.94 
  -1  16  -1   10.88    2.03 
   1  16   1   14.35    2.07 
  -1 -16   1   10.60    1.63 
   1  16   1   12.33    2.10 
  -1 -16   1   10.76    2.30 
   1 -16  -1   10.48    2.05 
   1 -16  -1   10.46    2.07 
   1 -16  -1   12.36    2.15 
  -1 -16   1    9.97    1.77 
  -1  16  -1   10.68    2.03 
  -1  16  -1   16.32    2.14 
   1 -16  -1   14.53    2.18 
  -1 -16   1   14.80    1.98 
   1 -16  -1   12.28    1.85 
   2 -16   1   23.88    2.97 
  -2  16   1   20.07    2.39 
   2 -16   1   19.54    2.31 
  -2  16   1   19.14    2.27 
  -2  16   1   26.19    3.14 
   2  16  -1   21.61    2.69 
   2 -16   1   27.61    3.00 
  -2 -16  -1   18.83    2.64 
   2 -16   1   25.72    3.43 
  -2 -16  -1   26.44    2.79 
  -2 -16  -1   21.92    2.77 
   2  16  -1   27.95    3.37 
  -2 -16  -1   20.71    2.62 
  -2 -16  -1   22.65    2.76 
   2 -16   1   22.30    3.00 
   2 -16   1   22.29    3.03 
  -2 -16  -1   24.67    2.61 
   2 -16   1   25.18    3.11 
  -2 -16  -1   22.04    2.22 
   2  16  -1   23.44    2.69 
   2  16  -1   21.11    2.35 
  -2 -16   1   25.49    3.56 
   2 -16  -1   24.79    3.26 
   2 -16  -1   25.84    3.17 
   2 -16  -1   27.01    3.14 
  -2  16  -1   30.67    3.17 
   2  16   1   27.03    3.30 
  -2 -16   1   19.92    2.51 
  -2 -16   1   24.52    2.53 
   2 -16  -1   24.97    3.02 
   2  16   1   22.71    2.94 
   2 -16  -1   26.31    3.48 
  -2  16  -1   32.93    3.15 
   2 -16  -1   24.39    3.14 
   2  16   1   25.35    2.79 
  -2 -16   1   28.66    2.67 
   2  16   1   22.03    2.89 
   2 -16  -1   26.25    3.14 
  -2 -16   1   27.79    2.60 
  -2 -16   1   29.41    3.57 
   3 -16   1    5.76    2.20 
  -3  16   1    4.29    2.03 
  -3 -16  -1    5.12    1.60 
   3  16  -1    3.61    1.52 
  -3 -16  -1    5.50    1.67 
   3 -16   1    7.97    2.02 
   3 -16   1    7.61    2.16 
   3 -16   1    5.50    2.18 
   3 -16   1    4.17    1.75 
   3  16  -1    3.46    1.52 
  -3 -16  -1    6.61    2.14 
   3  16  -1    6.54    2.06 
   3 -16   1    8.06    2.12 
  -3 -16  -1    6.24    1.61 
  -3  16   1    2.66    1.98 
   3 -16   1    9.38    1.98 
  -3 -16  -1    4.22    1.03 
  -3 -16  -1    6.57    1.60 
   3  16  -1    7.88    1.41 
   3 -16  -1    4.81    2.08 
   3 -16  -1    8.41    1.99 
  -3 -16   1    6.47    1.65 
   3 -16  -1    3.13    1.73 
   3  16   1    5.17    1.69 
  -3 -16   1    6.67    1.58 
   3  16   1    8.01    1.84 
  -3  16  -1    5.01    2.12 
  -3  16  -1    7.35    2.21 
   3  16   1    3.63    1.39 
  -3 -16   1    3.23    1.14 
  -3 -16   1    5.76    2.29 
   3  16   1    7.67    2.25 
   3 -16  -1    5.74    2.12 
   3 -16  -1    9.61    2.00 
   3 -16  -1    7.09    2.09 
   3 -16  -1    6.86    2.07 
  -3  16  -1    6.44    3.24 
  -3 -16   1    3.91    1.47 
  -3 -16   1    7.13    1.55 
   4  16  -1    3.27    1.55 
  -4 -16  -1    4.38    1.52 
   4 -16   1    6.51    2.15 
   4 -16   1    6.46    2.21 
  -4 -16  -1    2.78    1.52 
   4  16  -1    4.52    1.33 
  -4  16   1    2.12    2.11 
   4  16  -1    2.42    2.10 
  -4 -16  -1    3.80    2.08 
   4 -16   1    4.70    2.11 
   4 -16   1    4.04    2.41 
  -4 -16  -1    5.81    1.61 
  -4  16   1    4.45    2.25 
  -4 -16  -1    3.63    0.67 
  -4  16   1    3.22    2.34 
   4 -16   1    5.72    2.25 
   4  16  -1    7.36    1.58 
   4 -16   1    5.12    1.70 
  -4 -16  -1    6.30    1.63 
   4 -16   1    7.64    2.33 
  -4  16   1   10.19    2.39 
  -4 -16   1    3.27    1.41 
   4 -16  -1    3.10    1.93 
  -4 -16   1    3.14    1.38 
   4  16   1    4.21    1.39 
  -4 -16   1    2.59    1.34 
   4 -16  -1    0.81    2.01 
   4 -16  -1    0.04    1.89 
  -4 -16   1   -1.59    2.04 
  -4  16  -1    5.58    2.18 
   4  16   1    3.05    1.61 
   4  16   1    5.66    1.75 
  -4 -16   1    3.44    0.95 
   4 -16  -1    4.87    1.67 
   4 -16  -1    1.18    2.27 
  -4  16  -1    3.16    1.96 
   4 -16  -1    2.81    2.06 
  -4 -16   1    1.36    1.44 
   4  16   1    3.70    2.24 
   4 -16  -1    1.75    2.03 
   5 -16   1   27.32    3.11 
   5 -16   1   25.77    3.05 
  -5 -16  -1   22.20    2.62 
   5 -16   1   19.83    2.95 
  -5  16   1   26.77    3.79 
   5 -16   1   26.39    3.16 
   5  16  -1   21.57    2.19 
  -5 -16  -1   19.75    2.53 
   5  16  -1   24.30    3.06 
   5 -16   1   24.82    3.04 
  -5  16   1   29.11    3.85 
   5  16  -1   28.05    2.62 
   5  16  -1   22.37    2.74 
  -5 -16  -1   24.21    2.77 
  -5 -16  -1   25.74    2.38 
  -5 -16  -1   27.01    3.22 
  -5  16   1   25.78    3.13 
   5 -16   1   23.65    3.03 
  -5 -16   1   30.91    2.82 
   5 -16  -1   24.15    3.00 
  -5  16  -1   24.91    3.05 
  -5 -16   1   25.80    2.33 
   5 -16  -1   25.74    2.99 
  -5 -16   1   30.29    2.37 
   5  16   1   27.65    2.70 
  -5 -16   1   21.27    2.98 
  -5  16  -1   23.94    2.91 
   5  16   1   25.86    2.53 
   5 -16  -1   30.44    3.36 
   5  16   1   29.46    3.95 
   5  16   1   24.95    3.34 
   5 -16  -1   30.75    3.28 
  -5 -16   1   30.80    2.64 
   5 -16  -1   26.93    2.88 
   5 -16  -1   29.67    3.88 
   6 -16   1   19.53    2.99 
  -6  16   1   20.55    3.08 
   6 -16   1   20.05    2.94 
  -6 -16  -1   17.09    1.99 
   6 -16   1   19.31    2.99 
  -6 -16  -1   16.48    3.07 
  -6 -16  -1   17.65    2.15 
   6 -16   1   17.70    3.09 
   6  16  -1   16.44    2.84 
   6 -16   1   18.30    2.12 
  -6  16   1   20.62    3.03 
  -6  16   1   18.13    2.83 
   6  16  -1   13.13    1.89 
  -6 -16  -1   17.25    1.95 
  -6 -16   1   18.61    2.97 
  -6  16  -1   19.27    3.07 
   6 -16  -1   16.69    2.05 
  -6 -16   1   15.36    1.92 
  -6 -16   1   17.48    2.42 
   6 -16  -1   15.98    2.76 
   6  16   1   13.69    2.73 
   6 -16  -1   32.15    4.31 
   6  16   1   17.31    2.53 
  -6 -16   1   19.04    2.23 
   6 -16  -1   19.00    2.96 
  -6  16  -1   23.33    3.19 
   6 -16  -1   18.26    2.95 
  -7  16   1   -2.37    2.74 
  -7 -16  -1    3.65    1.63 
   7 -16   1    3.15    2.56 
  -7 -16  -1    3.94    1.63 
   7 -16   1   -0.10    3.07 
  -7  16   1   -0.04    2.66 
   7  16  -1    3.37    1.64 
   7 -16   1    4.40    2.68 
  -7 -16  -1    4.19    2.50 
  -7  16   1    3.44    2.57 
   7  16  -1    1.73    2.59 
   7 -16   1    1.14    2.53 
  -7 -16   1    3.35    1.29 
  -7 -16   1    6.19    1.60 
   7 -16  -1    4.02    2.92 
  -7  16  -1    1.36    2.72 
  -7 -16   1    3.05    2.69 
   7  16   1    2.89    2.66 
   7 -16  -1   -1.26    2.56 
  -7  16  -1   -0.48    2.74 
  -7 -16   1    3.01    1.47 
   7 -16  -1    3.41    2.83 
   7 -16  -1    2.58    2.90 
  -8 -16  -1    2.60    2.85
[truncated: 9,190,107 more chars]
